# Supplementary material
Source: Elsevier journal article supplement (https://univ-rennes.hal.science/hal-01532174v1/file/mmc3.zip)
Supplement: mmc3 [file mmc3.zip]

Archive with 2 entries (2 files):
- Complex_5.cif
- CHECKCIF-complex_5.pdf
