# Supplementary material
Source: Elsevier journal article supplement (https://univ-rennes.hal.science/hal-01532174v1/file/mmc3.zip)
Supplement: mmc3 [file mmc3.zip › Complex_5.cif]

data_mf_jc_jc014_0m
_audit_creation_date              2016-08-14
_audit_creation_method
;
Olex2 1.2
(compiled 2016.02.19 svn.r3266 for OlexSys, GUI svn.r5155)
;
_publ_contact_author_address      ?
_publ_contact_author_email        ?
_publ_contact_author_name         ''
_publ_contact_author_phone        ?
_publ_section_references
;
Burla, M.C., Caliandro, R., Camalli, M., Carrozzini, B., Cascarano, G.L.,
 De Caro, L., Giacovazzo, C., Polidori, G., Siliqi, D., Spagna, R.
 (2007). J. Appl. Cryst. 40, 609-613.

Dolomanov, O.V., Bourhis, L.J., Gildea, R.J, Howard, J.A.K. & Puschmann, H.
 (2009), J. Appl. Cryst. 42, 339-341.

Sheldrick, G.M. (2008). Acta Cryst. A64, 112-122.
;
_chemical_name_common             ?
_chemical_name_systematic         ?
_chemical_formula_moiety          'C25 H22 Cu N2 O4, C H2 Cl2'
_chemical_formula_sum             'C26 H24 Cl2 Cu N2 O4'
_chemical_formula_weight          562.91
_chemical_melting_point           ?
loop_
  _atom_type_symbol
  _atom_type_description
  _atom_type_scat_dispersion_real
  _atom_type_scat_dispersion_imag
  _atom_type_scat_source
 'C' 'C' 0.0033 0.0016 'International Tables Vol C Tables 4.2.6.8 and 6.1.1.4'
 'H' 'H' 0.0000 0.0000 'International Tables Vol C Tables 4.2.6.8 and 6.1.1.4'
 'Cl' 'Cl' 0.1484 0.1585 'International Tables Vol C Tables 4.2.6.8 and 6.1.1.4'
 'Cu' 'Cu' 0.3201 1.2651 'International Tables Vol C Tables 4.2.6.8 and 6.1.1.4'
 'N' 'N' 0.0061 0.0033 'International Tables Vol C Tables 4.2.6.8 and 6.1.1.4'
 'O' 'O' 0.0106 0.0060 'International Tables Vol C Tables 4.2.6.8 and 6.1.1.4'

_shelx_space_group_comment
;
The symmetry employed for this shelxl refinement is uniquely defined
by the following loop, which should always be used as a source of
symmetry information in preference to the above space-group names.
They are only intended as comments.
;
_space_group_crystal_system       'triclinic'
_space_group_IT_number            2
_space_group_name_H-M_alt         'P -1'
_space_group_name_Hall            '-P 1'
loop_
  _space_group_symop_operation_xyz
 'x, y, z'
 '-x, -y, -z'

_cell_length_a                    7.3942(4)
_cell_length_b                    12.9514(7)
_cell_length_c                    13.1842(6)
_cell_angle_alpha                 99.6020(10)
_cell_angle_beta                  97.8760(10)
_cell_angle_gamma                 96.109(2)
_cell_volume                      1222.31(11)
_cell_formula_units_Z             2
_cell_measurement_reflns_used     9679
_cell_measurement_temperature     296(2)
_cell_measurement_theta_max       25.90
_cell_measurement_theta_min       2.80
_shelx_estimated_absorpt_T_max    ?
_shelx_estimated_absorpt_T_min    ?
_exptl_absorpt_coefficient_mu     1.149
_exptl_absorpt_correction_T_max   0.7454
_exptl_absorpt_correction_T_min   0.6611
_exptl_absorpt_correction_type    multi-scan
_exptl_absorpt_process_details
;
SADABS-2014/5 (Bruker,2014/5) was used for absorption correction.
wR2(int) was 0.0620 before and 0.0543 after correction.
The Ratio of minimum to maximum transmission is 0.8869.
The \l/2 correction factor is 0.00150.
;
_exptl_absorpt_special_details    ?
_exptl_crystal_colour             'clear dark green'
_exptl_crystal_colour_lustre      clear
_exptl_crystal_colour_modifier    dark
_exptl_crystal_colour_primary     green
_exptl_crystal_density_diffrn     1.529
_exptl_crystal_density_meas       .
_exptl_crystal_density_method     ?
_exptl_crystal_description        plate
_exptl_crystal_F_000              578
_exptl_crystal_size_max           0.32
_exptl_crystal_size_mid           0.252
_exptl_crystal_size_min           0.038
_exptl_transmission_factor_max    ?
_exptl_transmission_factor_min    ?
_diffrn_reflns_av_R_equivalents   0.0521
_diffrn_reflns_av_unetI/netI      0.0215
_diffrn_reflns_Laue_measured_fraction_full 0.999
_diffrn_reflns_Laue_measured_fraction_max 0.994
_diffrn_reflns_limit_h_max        9
_diffrn_reflns_limit_h_min        -9
_diffrn_reflns_limit_k_max        16
_diffrn_reflns_limit_k_min        -16
_diffrn_reflns_limit_l_max        16
_diffrn_reflns_limit_l_min        -16
_diffrn_reflns_number             65735
_diffrn_reflns_point_group_measured_fraction_full 0.999
_diffrn_reflns_point_group_measured_fraction_max 0.994
_diffrn_reflns_theta_full         26.000
_diffrn_reflns_theta_max          26.472
_diffrn_reflns_theta_min          2.459
_diffrn_ambient_temperature       296.15
_diffrn_detector_area_resol_mean  ?
_diffrn_measured_fraction_theta_full 0.999
_diffrn_measured_fraction_theta_max 0.994
_diffrn_measurement_device_type   'Bruker APEX-II CCD'
_diffrn_measurement_method        '\f and \w scans'
_diffrn_radiation_monochromator   'graphite'
_diffrn_radiation_type            MoK\a
_diffrn_radiation_wavelength      0.71073
_diffrn_source                    ?
_diffrn_standards_number          0
_reflns_Friedel_coverage          0.000
_reflns_Friedel_fraction_full     .
_reflns_Friedel_fraction_max      .
_reflns_number_gt                 4009
_reflns_number_total              5030
_reflns_special_details
;
 Reflections were merged by SHELXL according to the crystal
 class for the calculation of statistics and refinement.
 
 _reflns_Friedel_fraction is defined as the number of unique
 Friedel pairs measured divided by the number that would be
 possible theoretically, ignoring centric projections and
 systematic absences.
;
_reflns_threshold_expression      'I > 2\s(I)'
_computing_cell_refinement        'SAINT v8.27A (Bruker, 2012)'
_computing_data_collection        ?
_computing_data_reduction         'SAINT v8.27A (Bruker, 2012)'
_computing_molecular_graphics     'Olex2 (Dolomanov et al., 2009)'
_computing_publication_material   'Olex2 (Dolomanov et al., 2009)'
_computing_structure_refinement   'XL (Sheldrick, 2008)'
_computing_structure_solution     'SIR2004 (Burla et al., 2007)'
_refine_diff_density_max          0.917
_refine_diff_density_min          -0.812
_refine_diff_density_rms          0.069
_refine_ls_extinction_coef        .
_refine_ls_extinction_method      none
_refine_ls_goodness_of_fit_ref    1.089
_refine_ls_hydrogen_treatment     mixed
_refine_ls_matrix_type            full
_refine_ls_number_parameters      318
_refine_ls_number_reflns          5030
_refine_ls_number_restraints      0
_refine_ls_R_factor_all           0.0668
_refine_ls_R_factor_gt            0.0455
_refine_ls_restrained_S_all       1.089
_refine_ls_shift/su_max           0.001
_refine_ls_shift/su_mean          0.000
_refine_ls_structure_factor_coef  Fsqd
_refine_ls_weighting_details
'w=1/[\s^2^(Fo^2^)+(0.0530P)^2^+1.5800P] where P=(Fo^2^+2Fc^2^)/3'
_refine_ls_weighting_scheme       calc
_refine_ls_wR_factor_gt           0.1098
_refine_ls_wR_factor_ref          0.1287
_refine_special_details           ?
_olex2_refinement_description
;
1. Fixed Uiso
 At 1.2 times of:
  All C(H) groups
 At 1.5 times of:
  All C(H,H,H) groups
2.a Free rotating group:
 Cl2(Cl1,C26,H26A,H26B)
2.b Aromatic/amide H refined with riding coordinates:
 C3(H3), C4(H4), C6(H6), C7(H7), C9(H9), C13(H13), C14(H14), C15(H15),
 C16(H16), C18(H18), C21(H21), C23(H23), C24(H24)
2.c Idealised Me refined as rotating group:
 C1(H1A,H1B,H1C), C11(H11A,H11B,H11C), C25(H25A,H25B,H25C)
;
_atom_sites_solution_hydrogens    mixed
_atom_sites_solution_primary      direct
_atom_sites_solution_secondary    ?
loop_
  _atom_site_label
  _atom_site_type_symbol
  _atom_site_fract_x
  _atom_site_fract_y
  _atom_site_fract_z
  _atom_site_U_iso_or_equiv
  _atom_site_adp_type
  _atom_site_occupancy
  _atom_site_site_symmetry_order
  _atom_site_calc_flag
  _atom_site_refinement_flags_posn
  _atom_site_refinement_flags_adp
  _atom_site_refinement_flags_occupancy
  _atom_site_disorder_assembly
  _atom_site_disorder_group
 Cu1 Cu 0.68558(6) 0.66145(3) 0.54116(3) 0.03894(14) Uani 1 1 d . . . . .
 O1 O 0.6851(4) 0.75569(17) 0.66893(18) 0.0492(6) Uani 1 1 d . . . . .
 O2 O 0.7675(3) 0.55965(16) 0.62021(16) 0.0414(5) Uani 1 1 d . . . . .
 O3 O 0.7906(4) 1.0731(2) 1.0948(2) 0.0631(7) Uani 1 1 d . . . . .
 O4 O 0.9783(4) 0.2399(2) 0.6861(2) 0.0602(7) Uani 1 1 d . . . . .
 N1 N 0.6404(4) 0.7686(2) 0.4553(2) 0.0389(6) Uani 1 1 d . . . . .
 N2 N 0.6568(3) 0.56727(19) 0.40928(19) 0.0357(5) Uani 1 1 d . . . . .
 C1 C 0.7404(6) 1.0208(4) 1.1744(3) 0.0686(11) Uani 1 1 d . . . . .
 H1A H 0.6119 0.9933 1.1583 0.103 Uiso 1 1 calc GR . . . .
 H1B H 0.7632 1.0696 1.2395 0.103 Uiso 1 1 calc GR . . . .
 H1C H 0.8120 0.9637 1.1797 0.103 Uiso 1 1 calc GR . . . .
 C2 C 0.7640(5) 1.0169(3) 0.9952(3) 0.0449(7) Uani 1 1 d . . . . .
 C3 C 0.8151(5) 1.0714(3) 0.9212(3) 0.0499(8) Uani 1 1 d . . . . .
 H3 H 0.8625 1.1425 0.9402 0.060 Uiso 1 1 calc R . . . .
 C4 C 0.7973(5) 1.0223(3) 0.8190(3) 0.0468(8) Uani 1 1 d . . . . .
 H4 H 0.8315 1.0609 0.7696 0.056 Uiso 1 1 calc R . . . .
 C5 C 0.7286(4) 0.9153(2) 0.7882(3) 0.0418(7) Uani 1 1 d . . . . .
 C6 C 0.6764(5) 0.8620(3) 0.8641(3) 0.0505(8) Uani 1 1 d . . . . .
 H6 H 0.6296 0.7907 0.8453 0.061 Uiso 1 1 calc R . . . .
 C7 C 0.6913(5) 0.9109(3) 0.9672(3) 0.0531(9) Uani 1 1 d . . . . .
 H7 H 0.6533 0.8735 1.0166 0.064 Uiso 1 1 calc R . . . .
 C8 C 0.7130(4) 0.8570(2) 0.6796(3) 0.0410(7) Uani 1 1 d . . . . .
 C9 C 0.7290(5) 0.9112(3) 0.5983(3) 0.0500(8) Uani 1 1 d . . . . .
 H9 H 0.7658 0.9837 0.6171 0.060 Uiso 1 1 calc R . . . .
 C10 C 0.6966(5) 0.8700(2) 0.4916(3) 0.0435(7) Uani 1 1 d . . . . .
 C11 C 0.7372(6) 0.9485(3) 0.4221(3) 0.0635(11) Uani 1 1 d . . . . .
 H11A H 0.7761 0.9130 0.3605 0.095 Uiso 1 1 calc GR . . . .
 H11B H 0.8332 1.0031 0.4588 0.095 Uiso 1 1 calc GR . . . .
 H11C H 0.6280 0.9794 0.4029 0.095 Uiso 1 1 calc GR . . . .
 C12 C 0.5821(4) 0.7233(3) 0.3497(3) 0.0412(7) Uani 1 1 d . . . . .
 C13 C 0.5045(5) 0.7731(3) 0.2710(3) 0.0528(9) Uani 1 1 d . . . . .
 H13 H 0.4901 0.8442 0.2866 0.063 Uiso 1 1 calc R . . . .
 C14 C 0.4495(5) 0.7184(3) 0.1712(3) 0.0592(10) Uani 1 1 d . . . . .
 H14 H 0.4052 0.7540 0.1191 0.071 Uiso 1 1 calc R . . . .
 C15 C 0.4588(6) 0.6126(4) 0.1470(3) 0.0620(10) Uani 1 1 d . . . . .
 H15 H 0.4210 0.5764 0.0790 0.074 Uiso 1 1 calc R . . . .
 C16 C 0.5248(5) 0.5597(3) 0.2240(3) 0.0531(9) Uani 1 1 d . . . . .
 H16 H 0.5263 0.4871 0.2082 0.064 Uiso 1 1 calc R . . . .
 C17 C 0.5888(4) 0.6139(3) 0.3247(3) 0.0419(7) Uani 1 1 d . . . . .
 C18 C 0.6965(5) 0.4719(2) 0.3966(2) 0.0414(7) Uani 1 1 d . . . . .
 H18 H 0.6782 0.4345 0.3286 0.050 Uiso 1 1 calc R . . . .
 C19 C 0.7650(4) 0.4185(2) 0.4760(3) 0.0405(7) Uani 1 1 d . . . . .
 C20 C 0.8000(4) 0.4651(2) 0.5834(2) 0.0366(6) Uani 1 1 d . . . . .
 C21 C 0.8727(4) 0.4038(2) 0.6548(3) 0.0419(7) Uani 1 1 d . . . . .
 H21 H 0.8962 0.4323 0.7256 0.050 Uiso 1 1 calc R . . . .
 C22 C 0.9091(4) 0.3030(3) 0.6213(3) 0.0450(8) Uani 1 1 d . . . . .
 C23 C 0.8770(5) 0.2576(3) 0.5157(3) 0.0559(9) Uani 1 1 d . . . . .
 H23 H 0.9035 0.1896 0.4937 0.067 Uiso 1 1 calc R . . . .
 C24 C 0.8062(5) 0.3145(3) 0.4453(3) 0.0539(9) Uani 1 1 d . . . . .
 H24 H 0.7842 0.2841 0.3750 0.065 Uiso 1 1 calc R . . . .
 C25 C 1.0318(5) 0.2837(3) 0.7928(3) 0.0601(10) Uani 1 1 d . . . . .
 H25A H 1.1188 0.3461 0.8003 0.090 Uiso 1 1 calc GR . . . .
 H25B H 1.0874 0.2331 0.8281 0.090 Uiso 1 1 calc GR . . . .
 H25C H 0.9254 0.3018 0.8226 0.090 Uiso 1 1 calc GR . . . .
 Cl2 Cl 1.2141(3) 0.65209(19) 0.87433(14) 0.1703(12) Uani 1 1 d . . . A -1
 Cl1 Cl 0.8525(3) 0.63269(16) 0.94241(15) 0.1576(10) Uani 1 1 d G . . A -1
 C26 C 0.9834(3) 0.6761(3) 0.8520(2) 0.0892(16) Uani 1 1 d G . . A -1
 H26A H 0.9216 0.6340 0.7748 0.12(2) Uiso 1 1 d G . . A -1
 H26B H 0.9825 0.7607 0.8584 0.14(2) Uiso 1 1 d G . . A -1

loop_
  _atom_site_aniso_label
  _atom_site_aniso_U_11
  _atom_site_aniso_U_22
  _atom_site_aniso_U_33
  _atom_site_aniso_U_23
  _atom_site_aniso_U_13
  _atom_site_aniso_U_12
 Cu1 0.0458(2) 0.0281(2) 0.0445(2) 0.00955(15) 0.00865(16) 0.00583(15)
 O1 0.0689(16) 0.0320(12) 0.0478(13) 0.0069(10) 0.0128(11) 0.0085(11)
 O2 0.0565(14) 0.0288(10) 0.0400(11) 0.0074(9) 0.0055(10) 0.0109(9)
 O3 0.083(2) 0.0565(16) 0.0500(14) 0.0081(12) 0.0121(13) 0.0087(14)
 O4 0.0606(16) 0.0446(14) 0.0819(19) 0.0258(13) 0.0084(14) 0.0173(12)
 N1 0.0380(14) 0.0341(13) 0.0480(15) 0.0138(11) 0.0091(11) 0.0070(11)
 N2 0.0335(13) 0.0355(13) 0.0392(13) 0.0122(10) 0.0053(10) 0.0022(10)
 C1 0.074(3) 0.088(3) 0.055(2) 0.026(2) 0.023(2) 0.025(2)
 C2 0.0429(18) 0.0425(18) 0.0485(18) 0.0035(14) 0.0058(14) 0.0126(14)
 C3 0.058(2) 0.0356(17) 0.054(2) 0.0057(15) 0.0046(16) 0.0058(15)
 C4 0.052(2) 0.0385(17) 0.0528(19) 0.0124(14) 0.0105(16) 0.0087(15)
 C5 0.0391(17) 0.0355(16) 0.0533(19) 0.0086(14) 0.0094(14) 0.0127(13)
 C6 0.055(2) 0.0379(18) 0.058(2) 0.0059(15) 0.0128(17) 0.0076(15)
 C7 0.059(2) 0.050(2) 0.057(2) 0.0185(17) 0.0177(17) 0.0107(17)
 C8 0.0387(17) 0.0332(16) 0.0508(18) 0.0048(13) 0.0074(14) 0.0079(13)
 C9 0.062(2) 0.0287(16) 0.062(2) 0.0102(14) 0.0143(17) 0.0088(15)
 C10 0.0447(18) 0.0342(16) 0.0559(19) 0.0161(14) 0.0095(15) 0.0104(14)
 C11 0.086(3) 0.0390(19) 0.068(2) 0.0220(18) 0.010(2) -0.0006(19)
 C12 0.0331(16) 0.0432(17) 0.0506(18) 0.0164(14) 0.0087(13) 0.0055(13)
 C13 0.045(2) 0.054(2) 0.063(2) 0.0241(18) 0.0046(17) 0.0097(16)
 C14 0.050(2) 0.072(3) 0.059(2) 0.030(2) -0.0012(17) 0.0093(19)
 C15 0.057(2) 0.080(3) 0.047(2) 0.0131(19) -0.0016(17) 0.008(2)
 C16 0.051(2) 0.056(2) 0.052(2) 0.0110(16) 0.0035(16) 0.0095(17)
 C17 0.0322(16) 0.0484(18) 0.0476(18) 0.0151(14) 0.0076(13) 0.0045(13)
 C18 0.0455(18) 0.0350(16) 0.0408(16) 0.0021(13) 0.0051(14) 0.0020(13)
 C19 0.0398(17) 0.0312(15) 0.0507(18) 0.0067(13) 0.0090(14) 0.0040(13)
 C20 0.0314(15) 0.0306(15) 0.0487(17) 0.0098(13) 0.0092(13) 0.0003(12)
 C21 0.0432(18) 0.0347(16) 0.0512(18) 0.0132(14) 0.0123(14) 0.0049(13)
 C22 0.0362(17) 0.0333(16) 0.069(2) 0.0185(15) 0.0099(15) 0.0048(13)
 C23 0.061(2) 0.0308(17) 0.075(3) 0.0060(16) 0.0074(19) 0.0124(16)
 C24 0.062(2) 0.0377(18) 0.059(2) -0.0014(15) 0.0069(18) 0.0104(16)
 C25 0.050(2) 0.063(2) 0.077(3) 0.037(2) 0.0092(19) 0.0150(18)
 Cl2 0.195(2) 0.215(2) 0.0972(12) -0.0206(13) -0.0176(13) 0.145(2)
 Cl1 0.220(2) 0.1174(14) 0.1143(14) 0.0491(12) -0.0240(14) -0.0496(15)
 C26 0.128(5) 0.064(3) 0.063(3) 0.002(2) -0.023(3) 0.022(3)

_geom_special_details
;
 All esds (except the esd in the dihedral angle between two l.s. planes)
 are estimated using the full covariance matrix.  The cell esds are taken
 into account individually in the estimation of esds in distances, angles
 and torsion angles; correlations between esds in cell parameters are only
 used when they are defined by crystal symmetry.  An approximate (isotropic)
 treatment of cell esds is used for estimating esds involving l.s. planes.
;
loop_
  _geom_bond_atom_site_label_1
  _geom_bond_atom_site_label_2
  _geom_bond_distance
  _geom_bond_site_symmetry_2
  _geom_bond_publ_flag
 Cu1 O1 1.909(2) . ?
 Cu1 O2 1.910(2) . ?
 Cu1 N1 1.960(2) . ?
 Cu1 N2 1.922(3) . ?
 O1 C8 1.288(4) . ?
 O2 C20 1.300(4) . ?
 O3 C1 1.412(5) . ?
 O3 C2 1.368(4) . ?
 O4 C22 1.365(4) . ?
 O4 C25 1.411(5) . ?
 N1 C10 1.322(4) . ?
 N1 C12 1.406(4) . ?
 N2 C17 1.414(4) . ?
 N2 C18 1.289(4) . ?
 C1 H1A 0.9600 . ?
 C1 H1B 0.9600 . ?
 C1 H1C 0.9600 . ?
 C2 C3 1.367(5) . ?
 C2 C7 1.389(5) . ?
 C3 H3 0.9300 . ?
 C3 C4 1.372(5) . ?
 C4 H4 0.9300 . ?
 C4 C5 1.396(5) . ?
 C5 C6 1.382(5) . ?
 C5 C8 1.485(5) . ?
 C6 H6 0.9300 . ?
 C6 C7 1.384(5) . ?
 C7 H7 0.9300 . ?
 C8 C9 1.387(5) . ?
 C9 H9 0.9300 . ?
 C9 C10 1.397(5) . ?
 C10 C11 1.512(5) . ?
 C11 H11A 0.9600 . ?
 C11 H11B 0.9600 . ?
 C11 H11C 0.9600 . ?
 C12 C13 1.401(5) . ?
 C12 C17 1.407(5) . ?
 C13 H13 0.9300 . ?
 C13 C14 1.371(6) . ?
 C14 H14 0.9300 . ?
 C14 C15 1.366(6) . ?
 C15 H15 0.9300 . ?
 C15 C16 1.381(5) . ?
 C16 H16 0.9300 . ?
 C16 C17 1.388(5) . ?
 C18 H18 0.9300 . ?
 C18 C19 1.415(5) . ?
 C19 C20 1.420(4) . ?
 C19 C24 1.418(4) . ?
 C20 C21 1.417(4) . ?
 C21 H21 0.9300 . ?
 C21 C22 1.373(5) . ?
 C22 C23 1.396(5) . ?
 C23 H23 0.9300 . ?
 C23 C24 1.361(5) . ?
 C24 H24 0.9300 . ?
 C25 H25A 0.9600 . ?
 C25 H25B 0.9600 . ?
 C25 H25C 0.9600 . ?
 Cl2 C26 1.7601 . ?
 Cl1 C26 1.7600 . ?
 C26 H26A 1.0847 . ?
 C26 H26B 1.0847 . ?

loop_
  _geom_angle_atom_site_label_1
  _geom_angle_atom_site_label_2
  _geom_angle_atom_site_label_3
  _geom_angle
  _geom_angle_site_symmetry_1
  _geom_angle_site_symmetry_3
  _geom_angle_publ_flag
 O1 Cu1 O2 88.68(9) . . ?
 O1 Cu1 N1 93.86(10) . . ?
 O1 Cu1 N2 173.56(11) . . ?
 O2 Cu1 N1 171.15(10) . . ?
 O2 Cu1 N2 94.37(10) . . ?
 N2 Cu1 N1 83.98(11) . . ?
 C8 O1 Cu1 123.8(2) . . ?
 C20 O2 Cu1 126.6(2) . . ?
 C2 O3 C1 118.2(3) . . ?
 C22 O4 C25 118.1(3) . . ?
 C10 N1 Cu1 121.4(2) . . ?
 C10 N1 C12 125.2(3) . . ?
 C12 N1 Cu1 111.9(2) . . ?
 C17 N2 Cu1 112.8(2) . . ?
 C18 N2 Cu1 124.9(2) . . ?
 C18 N2 C17 122.2(3) . . ?
 O3 C1 H1A 109.5 . . ?
 O3 C1 H1B 109.5 . . ?
 O3 C1 H1C 109.5 . . ?
 H1A C1 H1B 109.5 . . ?
 H1A C1 H1C 109.5 . . ?
 H1B C1 H1C 109.5 . . ?
 O3 C2 C7 124.2(3) . . ?
 C3 C2 O3 115.8(3) . . ?
 C3 C2 C7 120.0(3) . . ?
 C2 C3 H3 119.6 . . ?
 C2 C3 C4 120.7(3) . . ?
 C4 C3 H3 119.6 . . ?
 C3 C4 H4 119.5 . . ?
 C3 C4 C5 121.0(3) . . ?
 C5 C4 H4 119.5 . . ?
 C4 C5 C8 123.4(3) . . ?
 C6 C5 C4 117.3(3) . . ?
 C6 C5 C8 119.3(3) . . ?
 C5 C6 H6 118.8 . . ?
 C5 C6 C7 122.3(3) . . ?
 C7 C6 H6 118.8 . . ?
 C2 C7 H7 120.7 . . ?
 C6 C7 C2 118.7(3) . . ?
 C6 C7 H7 120.7 . . ?
 O1 C8 C5 115.1(3) . . ?
 O1 C8 C9 124.4(3) . . ?
 C9 C8 C5 120.6(3) . . ?
 C8 C9 H9 116.1 . . ?
 C8 C9 C10 127.8(3) . . ?
 C10 C9 H9 116.1 . . ?
 N1 C10 C9 121.7(3) . . ?
 N1 C10 C11 122.9(3) . . ?
 C9 C10 C11 115.3(3) . . ?
 C10 C11 H11A 109.5 . . ?
 C10 C11 H11B 109.5 . . ?
 C10 C11 H11C 109.5 . . ?
 H11A C11 H11B 109.5 . . ?
 H11A C11 H11C 109.5 . . ?
 H11B C11 H11C 109.5 . . ?
 N1 C12 C17 115.0(3) . . ?
 C13 C12 N1 126.9(3) . . ?
 C13 C12 C17 117.8(3) . . ?
 C12 C13 H13 119.6 . . ?
 C14 C13 C12 120.8(4) . . ?
 C14 C13 H13 119.6 . . ?
 C13 C14 H14 119.5 . . ?
 C15 C14 C13 121.0(3) . . ?
 C15 C14 H14 119.5 . . ?
 C14 C15 H15 120.2 . . ?
 C14 C15 C16 119.6(4) . . ?
 C16 C15 H15 120.2 . . ?
 C15 C16 H16 119.7 . . ?
 C15 C16 C17 120.6(4) . . ?
 C17 C16 H16 119.7 . . ?
 C12 C17 N2 114.9(3) . . ?
 C16 C17 N2 125.1(3) . . ?
 C16 C17 C12 120.0(3) . . ?
 N2 C18 H18 116.8 . . ?
 N2 C18 C19 126.4(3) . . ?
 C19 C18 H18 116.8 . . ?
 C18 C19 C20 123.3(3) . . ?
 C18 C19 C24 117.7(3) . . ?
 C24 C19 C20 119.0(3) . . ?
 O2 C20 C19 124.2(3) . . ?
 O2 C20 C21 118.1(3) . . ?
 C21 C20 C19 117.7(3) . . ?
 C20 C21 H21 119.4 . . ?
 C22 C21 C20 121.2(3) . . ?
 C22 C21 H21 119.4 . . ?
 O4 C22 C21 124.0(3) . . ?
 O4 C22 C23 114.8(3) . . ?
 C21 C22 C23 121.2(3) . . ?
 C22 C23 H23 120.5 . . ?
 C24 C23 C22 118.9(3) . . ?
 C24 C23 H23 120.5 . . ?
 C19 C24 H24 119.0 . . ?
 C23 C24 C19 122.1(3) . . ?
 C23 C24 H24 119.0 . . ?
 O4 C25 H25A 109.5 . . ?
 O4 C25 H25B 109.5 . . ?
 O4 C25 H25C 109.5 . . ?
 H25A C25 H25B 109.5 . . ?
 H25A C25 H25C 109.5 . . ?
 H25B C25 H25C 109.5 . . ?
 Cl2 C26 H26A 108.2 . . ?
 Cl2 C26 H26B 108.2 . . ?
 Cl1 C26 Cl2 112.9 . . ?
 Cl1 C26 H26A 108.1 . . ?
 Cl1 C26 H26B 108.1 . . ?
 H26A C26 H26B 111.4 . . ?

loop_
  _geom_torsion_atom_site_label_1
  _geom_torsion_atom_site_label_2
  _geom_torsion_atom_site_label_3
  _geom_torsion_atom_site_label_4
  _geom_torsion
  _geom_torsion_site_symmetry_1
  _geom_torsion_site_symmetry_2
  _geom_torsion_site_symmetry_3
  _geom_torsion_site_symmetry_4
  _geom_torsion_publ_flag
 Cu1 O1 C8 C5 -173.1(2) . . . . ?
 Cu1 O1 C8 C9 6.5(5) . . . . ?
 Cu1 O2 C20 C19 -5.3(4) . . . . ?
 Cu1 O2 C20 C21 175.6(2) . . . . ?
 Cu1 N1 C10 C9 -23.5(4) . . . . ?
 Cu1 N1 C10 C11 154.2(3) . . . . ?
 Cu1 N1 C12 C13 166.7(3) . . . . ?
 Cu1 N1 C12 C17 -7.2(3) . . . . ?
 Cu1 N2 C17 C12 9.4(3) . . . . ?
 Cu1 N2 C17 C16 -168.1(3) . . . . ?
 Cu1 N2 C18 C19 1.0(5) . . . . ?
 O1 C8 C9 C10 8.6(6) . . . . ?
 O2 C20 C21 C22 179.6(3) . . . . ?
 O3 C2 C3 C4 179.0(3) . . . . ?
 O3 C2 C7 C6 -178.1(3) . . . . ?
 O4 C22 C23 C24 179.4(3) . . . . ?
 N1 C12 C13 C14 -178.4(3) . . . . ?
 N1 C12 C17 N2 -1.3(4) . . . . ?
 N1 C12 C17 C16 176.4(3) . . . . ?
 N2 C18 C19 C20 0.0(5) . . . . ?
 N2 C18 C19 C24 -177.8(3) . . . . ?
 C1 O3 C2 C3 -179.9(3) . . . . ?
 C1 O3 C2 C7 -0.3(5) . . . . ?
 C2 C3 C4 C5 -0.7(5) . . . . ?
 C3 C2 C7 C6 1.6(5) . . . . ?
 C3 C4 C5 C6 1.2(5) . . . . ?
 C3 C4 C5 C8 -177.6(3) . . . . ?
 C4 C5 C6 C7 -0.3(5) . . . . ?
 C4 C5 C8 O1 165.7(3) . . . . ?
 C4 C5 C8 C9 -14.0(5) . . . . ?
 C5 C6 C7 C2 -1.0(6) . . . . ?
 C5 C8 C9 C10 -171.8(3) . . . . ?
 C6 C5 C8 O1 -13.1(4) . . . . ?
 C6 C5 C8 C9 167.2(3) . . . . ?
 C7 C2 C3 C4 -0.7(5) . . . . ?
 C8 C5 C6 C7 178.5(3) . . . . ?
 C8 C9 C10 N1 1.3(6) . . . . ?
 C8 C9 C10 C11 -176.5(4) . . . . ?
 C10 N1 C12 C13 -26.9(5) . . . . ?
 C10 N1 C12 C17 159.2(3) . . . . ?
 C12 N1 C10 C9 171.3(3) . . . . ?
 C12 N1 C10 C11 -11.0(5) . . . . ?
 C12 C13 C14 C15 3.9(6) . . . . ?
 C13 C12 C17 N2 -175.8(3) . . . . ?
 C13 C12 C17 C16 1.9(5) . . . . ?
 C13 C14 C15 C16 -0.1(6) . . . . ?
 C14 C15 C16 C17 -2.7(6) . . . . ?
 C15 C16 C17 N2 179.2(3) . . . . ?
 C15 C16 C17 C12 1.8(5) . . . . ?
 C17 N2 C18 C19 180.0(3) . . . . ?
 C17 C12 C13 C14 -4.7(5) . . . . ?
 C18 N2 C17 C12 -169.7(3) . . . . ?
 C18 N2 C17 C16 12.7(5) . . . . ?
 C18 C19 C20 O2 2.3(5) . . . . ?
 C18 C19 C20 C21 -178.5(3) . . . . ?
 C18 C19 C24 C23 178.4(3) . . . . ?
 C19 C20 C21 C22 0.4(5) . . . . ?
 C20 C19 C24 C23 0.5(5) . . . . ?
 C20 C21 C22 O4 -179.7(3) . . . . ?
 C20 C21 C22 C23 0.5(5) . . . . ?
 C21 C22 C23 C24 -0.8(5) . . . . ?
 C22 C23 C24 C19 0.3(6) . . . . ?
 C24 C19 C20 O2 -180.0(3) . . . . ?
 C24 C19 C20 C21 -0.8(4) . . . . ?
 C25 O4 C22 C21 -6.1(5) . . . . ?
 C25 O4 C22 C23 173.8(3) . . . . ?

_shelx_SHELXL_version_number      '2014/7'
_iucr_refine_instructions_details
;

    mf_jc_jc014_0m.res created by SHELXL-2014/7

TITL MF_JC_JC014_0m in P-1 #2
REM reset to P-1 #2
CELL 0.71073 7.3942 12.9514 13.1842 99.602 97.876 96.109
ZERR 2 0.0004 0.0007 0.0006 0.001 0.001 0.002
LATT 1
SFAC C H Cl Cu N O
UNIT 52 48 4 2 4 8
 
L.S. 4 0 0
PLAN  15
TEMP 23
BOND
MORE -1
BOND $H
CONF
fmap 2 53
acta 52
REM <olex2.extras>
REM <HklSrc "%.\\MF_JC_JC014_abs.hkl">
REM </olex2.extras>
 
WGHT    0.053000    1.580000
FVAR       0.38477
CU1   4    0.685578    0.661455    0.541159    11.00000    0.04580    0.02814 =
         0.04453    0.00955    0.00865    0.00583
O1    6    0.685118    0.755693    0.668930    11.00000    0.06894    0.03201 =
         0.04784    0.00686    0.01285    0.00851
O2    6    0.767526    0.559648    0.620213    11.00000    0.05648    0.02878 =
         0.04002    0.00744    0.00551    0.01094
O3    6    0.790617    1.073146    1.094753    11.00000    0.08264    0.05646 =
         0.04997    0.00814    0.01212    0.00870
O4    6    0.978334    0.239851    0.686112    11.00000    0.06058    0.04460 =
         0.08192    0.02581    0.00838    0.01729
N1    5    0.640355    0.768615    0.455261    11.00000    0.03802    0.03412 =
         0.04796    0.01382    0.00906    0.00701
N2    5    0.656827    0.567267    0.409278    11.00000    0.03353    0.03552 =
         0.03918    0.01217    0.00528    0.00219
C1    1    0.740415    1.020751    1.174435    11.00000    0.07397    0.08807 =
         0.05522    0.02617    0.02280    0.02533
AFIX 137
H1A   2    0.611940    0.993299    1.158290    11.00000   -1.50000
H1B   2    0.763162    1.069639    1.239497    11.00000   -1.50000
H1C   2    0.812003    0.963684    1.179704    11.00000   -1.50000
AFIX   0
C2    1    0.764022    1.016875    0.995190    11.00000    0.04294    0.04255 =
         0.04851    0.00353    0.00583    0.01255
C3    1    0.815120    1.071391    0.921153    11.00000    0.05773    0.03557 =
         0.05431    0.00567    0.00463    0.00578
AFIX  43
H3    2    0.862495    1.142540    0.940215    11.00000   -1.20000
AFIX   0
C4    1    0.797290    1.022298    0.819004    11.00000    0.05189    0.03851 =
         0.05277    0.01241    0.01050    0.00872
AFIX  43
H4    2    0.831476    1.060879    0.769588    11.00000   -1.20000
AFIX   0
C5    1    0.728627    0.915347    0.788162    11.00000    0.03907    0.03546 =
         0.05326    0.00861    0.00945    0.01269
C6    1    0.676409    0.861978    0.864109    11.00000    0.05545    0.03787 =
         0.05838    0.00589    0.01277    0.00758
AFIX  43
H6    2    0.629638    0.790725    0.845330    11.00000   -1.20000
AFIX   0
C7    1    0.691281    0.910864    0.967169    11.00000    0.05888    0.05004 =
         0.05669    0.01853    0.01769    0.01073
AFIX  43
H7    2    0.653347    0.873497    1.016643    11.00000   -1.20000
AFIX   0
C8    1    0.712954    0.857046    0.679645    11.00000    0.03868    0.03315 =
         0.05083    0.00482    0.00741    0.00794
C9    1    0.729049    0.911233    0.598305    11.00000    0.06175    0.02869 =
         0.06202    0.01021    0.01434    0.00880
AFIX  43
H9    2    0.765812    0.983661    0.617069    11.00000   -1.20000
AFIX   0
C10   1    0.696645    0.870023    0.491602    11.00000    0.04469    0.03415 =
         0.05589    0.01608    0.00954    0.01035
C11   1    0.737176    0.948538    0.422100    11.00000    0.08562    0.03902 =
         0.06761    0.02204    0.00970   -0.00065
AFIX 137
H11A  2    0.776088    0.913046    0.360486    11.00000   -1.50000
H11B  2    0.833183    1.003058    0.458766    11.00000   -1.50000
H11C  2    0.628000    0.979377    0.402908    11.00000   -1.50000
AFIX   0
C12   1    0.582083    0.723256    0.349665    11.00000    0.03314    0.04316 =
         0.05060    0.01638    0.00870    0.00547
C13   1    0.504499    0.773116    0.270956    11.00000    0.04520    0.05441 =
         0.06304    0.02412    0.00464    0.00972
AFIX  43
H13   2    0.490100    0.844196    0.286602    11.00000   -1.20000
AFIX   0
C14   1    0.449535    0.718448    0.171160    11.00000    0.05021    0.07192 =
         0.05922    0.03033   -0.00121    0.00935
AFIX  43
H14   2    0.405235    0.753961    0.119143    11.00000   -1.20000
AFIX   0
C15   1    0.458841    0.612621    0.146956    11.00000    0.05672    0.07999 =
         0.04676    0.01307   -0.00159    0.00822
AFIX  43
H15   2    0.420975    0.576401    0.078968    11.00000   -1.20000
AFIX   0
C16   1    0.524771    0.559716    0.223976    11.00000    0.05110    0.05568 =
         0.05198    0.01100    0.00347    0.00949
AFIX  43
H16   2    0.526293    0.487124    0.208246    11.00000   -1.20000
AFIX   0
C17   1    0.588792    0.613940    0.324672    11.00000    0.03220    0.04836 =
         0.04758    0.01506    0.00760    0.00447
C18   1    0.696457    0.471874    0.396587    11.00000    0.04548    0.03499 =
         0.04082    0.00206    0.00513    0.00204
AFIX  43
H18   2    0.678212    0.434490    0.328569    11.00000   -1.20000
AFIX   0
C19   1    0.764975    0.418485    0.475977    11.00000    0.03980    0.03120 =
         0.05067    0.00672    0.00901    0.00395
C20   1    0.799954    0.465105    0.583360    11.00000    0.03135    0.03057 =
         0.04874    0.00983    0.00917    0.00030
C21   1    0.872695    0.403786    0.654787    11.00000    0.04317    0.03468 =
         0.05115    0.01319    0.01227    0.00486
AFIX  43
H21   2    0.896210    0.432308    0.725591    11.00000   -1.20000
AFIX   0
C22   1    0.909068    0.303041    0.621334    11.00000    0.03617    0.03333 =
         0.06915    0.01846    0.00986    0.00481
C23   1    0.876969    0.257634    0.515693    11.00000    0.06133    0.03082 =
         0.07472    0.00603    0.00736    0.01236
AFIX  43
H23   2    0.903497    0.189647    0.493734    11.00000   -1.20000
AFIX   0
C24   1    0.806216    0.314471    0.445341    11.00000    0.06198    0.03769 =
         0.05863   -0.00137    0.00686    0.01044
AFIX  43
H24   2    0.784233    0.284136    0.374977    11.00000   -1.20000
AFIX   0
C25   1    1.031768    0.283740    0.792815    11.00000    0.05035    0.06300 =
         0.07681    0.03701    0.00921    0.01498
AFIX 137
H25A  2    1.118817    0.346101    0.800332    11.00000   -1.50000
H25B  2    1.087440    0.233129    0.828055    11.00000   -1.50000
H25C  2    0.925395    0.301848    0.822646    11.00000   -1.50000
AFIX   6
 
PART -1
CL2   3    1.214068    0.652095    0.874328    11.00000    0.19547    0.21545 =
         0.09716   -0.02064   -0.01764    0.14504
CL1   3    0.852503    0.632685    0.942413    11.00000    0.22042    0.11740 =
         0.11429    0.04914   -0.02398   -0.04955
C26   1    0.983415    0.676121    0.852022    11.00000    0.12808    0.06439 =
         0.06302    0.00202   -0.02256    0.02218
H26A  2    0.921594    0.633972    0.774842    11.00000    0.11978
H26B  2    0.982510    0.760651    0.858414    11.00000    0.14410
AFIX   0
HKLF 4
 
REM  MF_JC_JC014_0m in P-1 #2
REM R1 =  0.0455 for    4009 Fo > 4sig(Fo)  and  0.0668 for all    5030 data
REM    318 parameters refined using      0 restraints
 
END  
     
WGHT      0.0527      1.5916 

REM Highest difference peak  0.917,  deepest hole -0.812,  1-sigma level  0.069
Q1    1   0.9629  0.5782  0.9386  11.00000  0.05    0.92
Q2    1   1.2593  0.6775  0.8796  11.00000  0.05    0.61
Q3    1   1.1036  0.6242  0.9046  11.00000  0.05    0.58
Q4    1   1.1521  0.5960  0.8549  11.00000  0.05    0.52
Q5    1   0.8567  0.6588  0.9497  11.00000  0.05    0.50
Q6    1   0.8129  0.6449  0.9524  11.00000  0.05    0.48
Q7    1   1.2268  0.6974  0.8428  11.00000  0.05    0.47
Q8    1   0.8550  0.6231  0.8805  11.00000  0.05    0.37
Q9    1   0.9522  1.0154  0.3796  11.00000  0.05    0.32
Q10   1   0.7724  0.5180  0.5909  11.00000  0.05    0.31
Q11   1   0.5617  0.6598  0.3472  11.00000  0.05    0.31
Q12   1   0.6712  0.6609  0.5989  11.00000  0.05    0.30
Q13   1   0.5827  0.8219  0.4799  11.00000  0.05    0.29
Q14   1   0.6056  0.7234  0.4752  11.00000  0.05    0.28
Q15   1   1.1224  0.6344  0.8187  11.00000  0.05    0.28

  REM The information below was added by Olex2.
  REM
  REM R1 = 0.0455 for 4009 Fo > 4sig(Fo) and 0.0668 for all 65735 data
  REM n/a parameters refined using n/a restraints
  REM Highest difference peak 0.92, deepest hole -0.81
  REM Mean Shift 0, Max Shift 0.001.
  
  REM +++ Tabular Listing of Refinement Information +++
  REM R1_all = 0.0668
  REM R1_gt = 0.0455
  REM wR_ref = 0.1287
  REM GOOF = 1.089
  REM Shift_max = 0.001
  REM Shift_mean = 0
  REM Reflections_all = 65735
  REM Reflections_gt = 4009
  REM Parameters = n/a
  REM Hole = -0.81
  REM Peak = 0.92
  REM Flack = n/a
  
  
;
_olex2_submission_special_instructions 'No special instructions were received'
loop_
  _refln_index_h
  _refln_index_k
  _refln_index_l
  _refln_F_squared_meas
  _refln_F_squared_sigma
  _refln_scale_group_code
 -1 0 0 40.5477 1.37165 20
 -1 0 0 41.9745 1.56978 23
 -1 0 0 36.6822 1.61019 1
 -1 0 0 39.9893 1.67704 1
 -1 0 0 36.4977 1.45416 14
 1 0 0 39.5894 1.51074 14
 1 0 0 41.3066 1.37344 20
 1 0 0 36.5752 1.62637 1
 1 0 0 35.3217 1.6219 1
 1 0 0 39.4201 1.59031 23
 -2 0 0 2633.63 63.015 1
 -2 0 0 2778.01 62.7075 23
 -2 0 0 2628.74 62.9779 1
 -2 0 0 2613.33 63.2692 14
 -2 0 0 2771.59 62.4592 20
 2 0 0 2577.92 63.254 14
 2 0 0 2629.61 62.9855 1
 2 0 0 2515.55 63.605 8
 2 0 0 2744.5 62.9985 23
 2 0 0 2636.73 62.7504 1
 2 0 0 2630.67 63.194 5
 -3 0 0 134.729 4.58692 1
 -3 0 0 133.496 4.57626 1
 -3 0 0 136.27 4.22442 14
 -3 0 0 141.956 4.07099 20
 -3 0 0 148.521 4.36054 23
 3 0 0 134.036 3.62316 5
 3 0 0 136.824 4.59938 1
 3 0 0 132.454 4.49969 23
 3 0 0 132.82 4.19334 14
 3 0 0 133.408 4.60647 1
 3 0 0 129.132 3.84841 8
 -4 0 0 118.696 4.22212 23
 -4 0 0 118.554 4.24936 14
 -4 0 0 120.563 3.91754 20
 -4 0 0 115.12 4.51435 1
 4 0 0 121.027 4.60474 1
 4 0 0 106.582 3.63546 8
 4 0 0 113 4.56979 1
 4 0 0 116.584 3.27146 5
 4 0 0 114.544 4.09997 14
 4 0 0 113.404 4.53273 23
 -5 0 0 73.246 3.20596 20
 -5 0 0 76.8948 3.73881 14
 -5 0 0 79.2653 3.9992 1
 -5 0 0 72.3766 3.35179 4
 -5 0 0 76.5615 3.27472 23
 5 0 0 71.1766 4.05514 23
 5 0 0 72.0561 3.91129 1
 5 0 0 73.9564 3.50914 14
 5 0 0 70.7945 3.61497 1
 -6 0 0 36.9414 3.19868 4
 -6 0 0 36.0041 3.6268 1
 -6 0 0 29.0861 3.20819 14
 6 0 0 36.5911 3.74089 1
 6 0 0 34.7806 3.23285 14
 6 0 0 25.8804 3.15238 23
 6 0 0 29.174 3.47559 1
 -7 0 0 1.29615 2.08966 1
 -7 0 0 4.18253 2.22469 4
 -7 0 0 -1.2512 2.26653 14
 7 0 0 2.3319 2.06817 1
 7 0 0 3.04069 2.38178 14
 7 0 0 -2.7008 2.71259 23
 7 0 0 1.41685 2.11427 1
 -8 0 0 12.2166 2.98781 4
 -8 0 0 12.7494 2.58568 16
 -8 0 0 10.4973 3.02752 1
 8 0 0 8.49421 3.34634 23
 8 0 0 16.5545 3.08539 1
 8 0 0 13.3194 2.68615 1
 8 0 0 15.3285 3.53081 14
 -9 0 0 2.64892 1.65337 9
 -9 0 0 8.07248 3.5185 4
 -9 0 0 5.35616 2.86904 16
 -9 0 0 5.88453 3.25151 1
 9 0 0 0.5982 4.12982 14
 9 0 0 1.87229 3.07065 1
 9 0 0 -7.6314 2.96614 1
 9 -1 0 10.1488 3.25245 1
 9 -1 0 16.3815 4.69847 14
 9 -1 0 18.2111 3.54839 1
 9 -1 0 15.425 4.02436 23
 -9 1 0 16.1292 2.98881 16
 -9 1 0 9.60257 3.19422 1
 8 -1 0 6.37711 2.60923 1
 8 -1 0 9.06689 3.43149 14
 8 -1 0 5.31364 3.23203 23
 8 -1 0 11.418 2.94074 1
 -8 1 0 7.86549 2.37208 16
 -8 1 0 8.72945 2.943 1
 7 -1 0 33.9265 3.94445 1
 7 -1 0 29.404 3.52513 1
 7 -1 0 22.32 3.44951 23
 7 -1 0 34.2029 4.22635 14
 -7 1 0 34.9496 3.87692 1
 -7 1 0 26.4927 3.36782 4
 -7 1 0 30.9946 2.92342 16
 6 -1 0 71.0783 4.08962 23
 6 -1 0 71.5408 4.45916 1
 6 -1 0 78.4913 4.10588 14
 6 -1 0 74.1315 4.36282 1
 6 -1 0 65.3209 3.34369 8
 -6 1 0 72.8566 3.15587 16
 -6 1 0 78.2828 4.17901 14
 -6 1 0 78.9407 4.45749 1
 -6 1 0 77.5177 3.70686 4
 5 -1 0 15.9579 1.98839 14
 5 -1 0 15.7713 2.02467 8
 5 -1 0 19.2751 2.42757 1
 5 -1 0 16.737 2.1302 23
 5 -1 0 16.9979 2.32734 1
 -5 1 0 18.1821 2.17182 4
 -5 1 0 18.9185 2.12571 14
 -5 1 0 18.5359 2.36638 1
 -5 1 0 21.1967 2.8453 1
 -5 1 0 16.4942 1.75931 23
 4 -1 0 860.413 22.2187 23
 4 -1 0 871.762 21.92 14
 4 -1 0 884.009 22.2884 1
 4 -1 0 901.007 22.3604 1
 -4 1 0 874.63 21.6207 4
 -4 1 0 905.264 22.0038 14
 -4 1 0 888.904 22.287 1
 -4 1 0 883.19 22.3142 1
 -4 1 0 899.945 22.1406 23
 3 -1 0 8.86652 1.59783 1
 3 -1 0 7.11938 1.33287 14
 3 -1 0 9.66086 1.61242 1
 3 -1 0 8.08941 1.47834 23
 3 -1 0 7.4089 0.83316 17
 -3 1 0 9.0662 1.5554 1
 -3 1 0 8.01036 1.35441 14
 -3 1 0 8.00984 1.06905 4
 -3 1 0 6.3925 1.36649 23
 -3 1 0 9.392 1.6226 1
 2 -1 0 3102.17 71.4643 17
 2 -1 0 3021.16 72.5913 1
 2 -1 0 2995.09 72.4986 14
 2 -1 0 2974.79 72.0086 1
 2 -1 0 3058.5 72.4614 23
 -2 1 0 3209.89 71.7824 23
 -2 1 0 3100.34 71.8393 1
 -2 1 0 3018.03 72.9887 4
 -2 1 0 2932.24 71.9121 5
 -2 1 0 2988.11 72.7654 1
 -2 1 0 3028.88 72.0158 14
 1 -1 0 752.156 17.3457 23
 1 -1 0 700.309 17.2847 14
 1 -1 0 696.987 17.3534 1
 1 -1 0 750.186 17.0526 16
 1 -1 0 701.592 17.3481 1
 -1 1 0 733.745 17.0386 17
 -1 1 0 753.059 17.0517 16
 -1 1 0 703.34 17.3629 1
 -1 1 0 745.36 17.3279 23
 -1 1 0 692.817 17.3394 1
 -1 1 0 722.848 17.1844 13
 -1 -1 0 685.473 15.5172 20
 -1 -1 0 653.828 15.6856 1
 -1 -1 0 617.517 15.6271 15
 -1 -1 0 664.924 15.6665 23
 -1 -1 0 654.006 15.5398 14
 -1 -1 0 627.118 15.6166 9
 1 1 0 636.261 15.6962 1
 1 1 0 665.222 15.5451 14
 1 1 0 643.731 15.6069 9
 1 1 0 644.301 15.389 15
 -2 -1 0 675.076 15.971 23
 -2 -1 0 639.857 16.02 1
 -2 -1 0 627.111 15.7089 14
 -2 -1 0 641.109 15.5783 8
 -2 -1 0 665.573 15.6929 20
 2 1 0 663.349 15.9959 23
 2 1 0 639.69 15.734 14
 2 1 0 635.846 16.0152 1
 2 1 0 635.334 16.0244 1
 -3 -1 0 40.7318 2.70462 1
 -3 -1 0 45.2188 2.10031 20
 -3 -1 0 41.4324 2.21595 14
 -3 -1 0 45.2135 2.21071 23
 3 1 0 42.8843 2.72638 1
 3 1 0 39.7438 2.57275 23
 3 1 0 39.7118 2.74358 1
 3 1 0 39.0401 2.19143 14
 -4 -1 0 188.62 6.12097 1
 -4 -1 0 192.07 5.5691 20
 -4 -1 0 197.328 5.90112 14
 -4 -1 0 198.978 6.06624 23
 4 1 0 188.969 6.11826 23
 4 1 0 197.103 5.88942 14
 4 1 0 190.686 6.34508 1
 4 1 0 193.868 5.28647 5
 4 1 0 191.537 6.31441 1
 -5 -1 0 73.5019 3.25775 20
 -5 -1 0 72.6158 3.96531 1
 -5 -1 0 76.5447 3.44442 23
 -5 -1 0 74.4062 3.53078 14
 5 1 0 76.4909 4.04153 1
 5 1 0 72.9757 2.78979 5
 5 1 0 73.858 4.11975 23
 5 1 0 71.3838 3.5076 14
 5 1 0 78.5393 4.20805 1
 -6 -1 0 0.45842 1.90571 14
 -6 -1 0 0.17677 1.68095 20
 -6 -1 0 1.73836 1.97025 4
 -6 -1 0 -1.8142 1.80836 1
 6 1 0 -0.7381 2.38343 23
 6 1 0 2.46834 2.18159 1
 6 1 0 -0.4698 1.82986 1
 6 1 0 1.46917 1.99177 14
 -7 -1 0 19.8498 2.89939 14
 -7 -1 0 18.7615 2.78437 4
 -7 -1 0 18.0423 2.21449 20
 -7 -1 0 15.5295 2.38659 1
 -7 -1 0 15.6963 2.11344 9
 -7 -1 0 14.716 2.14418 15
 7 1 0 14.1266 3.28326 23
 7 1 0 17.1272 2.87083 14
 7 1 0 19.7874 3.21444 1
 7 1 0 17.288 2.55381 1
 -8 -1 0 0.61269 2.9325 4
 -8 -1 0 -0.6187 3.31079 14
 -8 -1 0 -2.2148 2.39244 1
 8 1 0 2.05809 3.26211 14
 8 1 0 1.61309 2.65984 1
 8 1 0 3.02988 2.66531 1
 9 -2 0 4.09559 4.30639 14
 9 -2 0 0.26689 3.14447 1
 9 -2 0 -0.4476 3.42546 23
 9 -2 0 6.81489 3.45807 1
 9 -2 0 -0.2214 3.63657 10
 -9 2 0 0.38317 3.12613 1
 -9 2 0 2.20895 3.76376 13
 -9 2 0 2.80456 2.68662 16
 8 -2 0 4.10612 3.25017 23
 8 -2 0 5.40271 2.64311 1
 8 -2 0 8.7143 2.71021 1
 8 -2 0 6.56414 3.29288 14
 -8 2 0 8.73322 2.95175 1
 -8 2 0 4.39197 2.19551 16
 7 -2 0 38.2204 3.87809 1
 7 -2 0 38.6938 3.28588 8
 7 -2 0 36.2575 4.45104 23
 7 -2 0 46.1999 4.12068 14
 7 -2 0 37.8396 4.02973 1
 -7 2 0 37.6145 4.02653 1
 -7 2 0 43.6244 2.95407 16
 6 -2 0 41.3842 3.90472 23
 6 -2 0 39.1751 2.88045 8
 6 -2 0 42.0779 3.2184 1
 6 -2 0 43.285 3.51927 14
 6 -2 0 42.9386 3.18623 1
 -6 2 0 35.7073 3.07688 1
 -6 2 0 37.4279 2.47435 16
 -6 2 0 38.0248 3.17098 1
 5 -2 0 119.112 4.89671 1
 5 -2 0 110.814 4.4389 14
 5 -2 0 106.173 4.79331 23
 5 -2 0 109.36 4.80763 1
 -5 2 0 119.918 4.91536 1
 -5 2 0 111.787 3.51695 16
 -5 2 0 112.029 4.81463 1
 -5 2 0 105.817 4.17712 23
 4 -2 0 17.6313 2.28688 14
 4 -2 0 17.8624 2.06352 1
 4 -2 0 16.0096 2.14217 1
 4 -2 0 14.4662 2.12577 23
 4 -2 0 19.7173 1.07519 17
 -4 2 0 20.9561 1.36458 16
 -4 2 0 19.3582 2.62096 1
 -4 2 0 18.3874 1.99529 23
 -4 2 0 17.1964 1.33809 22
 -4 2 0 22.5682 2.32697 14
 -4 2 0 18.4853 2.06165 1
 3 -2 0 530.059 13.9565 23
 3 -2 0 555.012 14.1341 1
 3 -2 0 522.638 14.0152 1
 3 -2 0 542.227 13.8832 14
 -3 2 0 567.263 13.2277 16
 -3 2 0 569.009 13.9589 23
 -3 2 0 553.053 14.0934 1
 -3 2 0 557.165 13.049 22
 -3 2 0 540.864 14.087 1
 2 -2 0 734.804 17.2704 10
 2 -2 0 722.106 17.8977 1
 2 -2 0 698.958 17.7898 14
 2 -2 0 744.43 17.282 16
 2 -2 0 701.585 17.4782 4
 2 -2 0 706.527 17.8394 23
 2 -2 0 738.51 17.9104 1
 -2 2 0 720.561 17.8618 1
 -2 2 0 756.537 17.281 16
 -2 2 0 746.469 17.189 17
 -2 2 0 712.253 17.5441 13
 -2 2 0 749.283 17.8442 23
 -2 2 0 730.617 17.9394 1
 1 -2 0 4.99697 1.05246 23
 1 -2 0 7.26246 0.67807 24
 1 -2 0 6.4462 0.69549 20
 1 -2 0 4.71649 0.73443 13
 1 -2 0 5.38157 0.64926 6
 1 -2 0 6.41082 0.6371 16
 1 -2 0 5.4039 0.99663 1
 1 -2 0 6.40177 1.03121 1
 -1 2 0 5.05108 0.97262 1
 -1 2 0 4.85267 0.60793 6
 -1 2 0 4.73249 0.80814 13
 -1 2 0 6.90783 0.82824 24
 -1 2 0 7.30874 0.99488 23
 -1 2 0 4.73829 1.03108 1
 0 -2 0 80.0649 2.17043 24
 0 -2 0 77.8875 2.48536 13
 0 -2 0 74.7662 2.5205 1
 0 -2 0 81.5228 2.2396 20
 0 -2 0 77.4959 2.48373 23
 0 -2 0 73.7498 2.53915 1
 0 -2 0 74.576 2.41963 21
 0 2 0 75.5692 2.43869 23
 0 2 0 73.2391 2.3663 21
 0 2 0 69.2821 2.53648 1
 0 2 0 77.0657 2.22497 24
 0 2 0 77.7667 2.21399 20
 -1 -2 0 24.4121 1.19942 24
 -1 -2 0 24.7203 1.07194 11
 -1 -2 0 23.0814 1.77408 1
 -1 -2 0 24.6778 1.36488 20
 -1 -2 0 23.8479 1.46165 21
 1 2 0 23.6787 1.54274 21
 1 2 0 25.924 0.76423 18
 1 2 0 23.787 1.85491 1
 1 2 0 25.9233 1.35598 24
 -2 -2 0 842.502 20.8871 14
 -2 -2 0 861.455 21.2475 1
 -2 -2 0 883.578 20.882 20
 -2 -2 0 859.508 20.8638 21
 -2 -2 0 882.536 21.1711 23
 2 2 0 857.314 21.2362 1
 2 2 0 879.182 20.8385 24
 -3 -2 0 75.4146 2.36214 15
 -3 -2 0 80.4207 2.73872 20
 -3 -2 0 77.4946 2.7579 8
 -3 -2 0 77.2209 2.36067 9
 -3 -2 0 78.7391 3.03526 14
 -3 -2 0 77.4831 3.21498 1
 -3 -2 0 82.0882 3.24847 23
 3 2 0 74.9938 2.91062 14
 3 2 0 76.3575 3.21006 1
 3 2 0 77.9633 3.54047 1
 -4 -2 0 89.3439 2.74336 9
 -4 -2 0 87.6088 4.13519 1
 -4 -2 0 94.4573 3.45608 20
 -4 -2 0 86.8933 2.76112 15
 -4 -2 0 95.4172 3.71208 23
 -4 -2 0 95.2695 3.55457 14
 4 2 0 90.228 4.1575 1
 4 2 0 90.6967 3.48314 14
 4 2 0 89.3414 4.11994 1
 -5 -2 0 -1.1294 1.40891 14
 -5 -2 0 1.47263 1.27147 23
 -5 -2 0 -0.6346 0.78238 9
 -5 -2 0 -0.311 1.85249 1
 -5 -2 0 0.05635 1.46431 20
 -5 -2 0 -0.1114 0.79894 15
 5 2 0 -0.5701 1.07284 5
 5 2 0 -3.1317 1.64407 1
 5 2 0 -0.2511 1.92453 1
 5 2 0 -0.2169 1.40769 14
 -6 -2 0 5.56827 0.98675 15
 -6 -2 0 4.3281 2.33219 1
 -6 -2 0 7.88173 1.93993 20
 -6 -2 0 5.04775 2.01988 14
 -6 -2 0 6.69195 0.98628 9
 6 2 0 2.70521 2.06172 1
 6 2 0 5.72324 1.49586 5
 6 2 0 5.42539 2.27331 1
 6 2 0 6.87619 2.11844 14
 -7 -2 0 4.19995 2.68299 4
 -7 -2 0 0.12594 2.31563 14
 -7 -2 0 0.37976 1.77924 1
 -7 -2 0 4.19356 1.71133 20
 7 2 0 -0.4114 1.98998 1
 7 2 0 0.07088 2.27905 1
 7 2 0 1.81014 2.59095 14
 -8 -2 0 -1.0394 3.17398 14
 -8 -2 0 1.19312 2.14087 1
 -8 -2 0 -0.0383 3.11999 4
 8 2 0 4.58711 2.82088 1
 8 2 0 -2.4393 1.86076 1
 8 2 0 0.55202 3.286 14
 9 -3 0 -2.6805 3.14668 10
 9 -3 0 0.78598 3.484 23
 9 -3 0 9.84466 4.59687 14
 9 -3 0 -3.2673 2.9938 1
 9 -3 0 10.2493 3.45023 1
 -9 3 0 -1.3779 3.62701 13
 -9 3 0 1.14345 2.60214 16
 -9 3 0 2.6141 3.12872 1
 8 -3 0 3.64917 2.43649 10
 8 -3 0 3.54351 2.65439 1
 8 -3 0 8.11493 2.55363 1
 8 -3 0 5.48006 2.38166 8
 8 -3 0 4.43888 3.18115 14
 8 -3 0 2.81974 3.19293 23
 -8 3 0 2.02738 2.58636 1
 -8 3 0 5.79001 3.00275 13
 -8 3 0 4.33129 2.09255 16
 7 -3 0 0.04517 2.41243 14
 7 -3 0 1.11012 1.83426 1
 7 -3 0 -0.5803 1.87897 8
 7 -3 0 -2.4211 1.9357 1
 7 -3 0 0.91038 2.74507 23
 7 -3 0 -0.5929 1.87367 10
 -7 3 0 0.01827 1.63006 16
 -7 3 0 0.90024 2.25785 1
 -7 3 0 1.63469 2.1621 13
 -7 3 0 -1.9116 2.16178 1
 6 -3 0 18.3747 2.58924 1
 6 -3 0 16.2086 1.81664 10
 6 -3 0 14.1592 2.55267 1
 6 -3 0 10.3358 2.71106 23
 6 -3 0 16.3445 2.45916 14
 -6 3 0 14.616 2.06111 13
 -6 3 0 14.5332 2.46009 1
 -6 3 0 12.3953 2.59577 1
 -6 3 0 14.2226 1.58737 16
 5 -3 0 5.00469 1.93559 1
 5 -3 0 1.77144 2.0298 23
 5 -3 0 0.03132 1.58896 1
 5 -3 0 3.7047 1.16538 10
 5 -3 0 4.17274 1.70017 14
 -5 3 0 2.19649 1.41612 13
 -5 3 0 3.97202 1.08806 16
 -5 3 0 2.27442 1.72871 1
 -5 3 0 4.45348 1.91627 1
 -5 3 0 5.32426 1.25752 23
 -5 3 0 4.61474 0.94658 22
 4 -3 0 106.65 4.3706 1
 4 -3 0 110.54 3.21601 10
 4 -3 0 100.022 4.30386 23
 4 -3 0 111.387 4.39496 1
 4 -3 0 107.895 4.14821 14
 -4 3 0 107.658 3.97091 23
 -4 3 0 103.594 2.74616 22
 -4 3 0 104.272 3.64428 13
 -4 3 0 103.316 4.38416 1
 -4 3 0 101.594 3.09251 16
 -4 3 0 103.334 4.28821 1
 3 -3 0 0.60287 0.54567 10
 3 -3 0 -0.8962 1.04825 23
 3 -3 0 -0.2552 1.38013 1
 3 -3 0 -1.0235 1.28627 14
 3 -3 0 1.29897 0.91654 4
 3 -3 0 1.37633 1.4487 1
 -3 3 0 1.56652 0.47209 17
 -3 3 0 2.95839 1.19852 23
 -3 3 0 1.97995 1.4599 1
 -3 3 0 0.91287 1.42928 1
 -3 3 0 0.57976 0.62449 16
 -3 3 0 0.75352 0.93083 13
 2 -3 0 446.304 11.5397 23
 2 -3 0 446.294 11.6049 1
 2 -3 0 447.871 11.6433 1
 2 -3 0 458.948 10.8915 16
 2 -3 0 466.13 10.6638 22
 2 -3 0 455.311 11.24 13
 2 -3 0 439.926 11.1433 24
 -2 3 0 477.188 11.5542 23
 -2 3 0 450.505 11.1053 6
 -2 3 0 443.562 10.7741 10
 -2 3 0 436.636 11.6034 1
 -2 3 0 471.24 10.8959 16
 -2 3 0 449.495 11.6103 1
 -2 3 0 452.834 11.2346 13
 1 -3 0 315.11 7.70019 16
 1 -3 0 314.584 8.00914 13
 1 -3 0 317.109 7.59898 7
 1 -3 0 310.018 8.19634 1
 1 -3 0 316.126 7.7252 6
 1 -3 0 276.259 7.83783 20
 1 -3 0 305.909 8.18488 1
 1 -3 0 337.308 7.8485 24
 1 -3 0 330.739 8.19626 23
 -1 3 0 311.65 8.23357 1
 -1 3 0 311.21 8.09437 23
 -1 3 0 319.831 7.87237 24
 -1 3 0 320.077 8.11188 21
 -1 3 0 316.397 8.01804 13
 -1 3 0 313.708 8.20273 1
 0 -3 0 2054.36 50.3195 1
 0 -3 0 2238.73 50.0903 20
 0 -3 0 2189.26 50.0247 24
 0 -3 0 2091.53 50.2764 23
 0 -3 0 2050.42 50.1383 21
 0 -3 0 2025.03 50.2399 13
 0 -3 0 2154.37 50.3635 1
 0 3 0 2133.72 50.3578 1
 0 3 0 2208.83 50.0491 24
 0 3 0 2020.15 50.1326 21
 0 3 0 2167.42 50.2764 23
 -1 -3 0 20.4275 1.15789 24
 -1 -3 0 19.6212 1.56258 21
 -1 -3 0 17.9268 1.13577 2
 -1 -3 0 18.7515 1.38917 20
 -1 -3 0 17.7458 1.57409 1
 -1 -3 0 18.3543 0.81112 18
 1 3 0 19.2422 1.72774 21
 1 3 0 19.9437 1.40968 24
 1 3 0 18.3059 1.99222 1
 -2 -3 0 60.1945 2.94483 1
 -2 -3 0 61.5573 2.55148 14
 -2 -3 0 63.6275 2.45796 21
 -2 -3 0 61.7288 2.38759 20
 2 3 0 63.0347 2.1698 15
 2 3 0 61.3214 2.00653 11
 2 3 0 62.9412 2.1609 9
 2 3 0 58.9576 2.98117 1
 2 3 0 65.9535 2.3729 24
 2 3 0 62.9601 1.59074 18
 -3 -3 0 -0.0318 1.49701 1
 -3 -3 0 0.16809 1.14088 14
 -3 -3 0 0.89877 1.07637 21
 -3 -3 0 -0.3053 1.12028 23
 -3 -3 0 1.24005 1.17421 20
 3 3 0 1.73748 1.14135 24
 3 3 0 0.01655 1.2103 1
 3 3 0 -0.0313 0.45249 18
 -4 -3 0 70.2173 2.93454 8
 -4 -3 0 70.755 3.0431 20
 -4 -3 0 71.6204 3.80688 1
 -4 -3 0 71.628 3.23834 23
 -4 -3 0 67.6828 3.12305 21
 -4 -3 0 71.8282 3.29142 14
 4 3 0 70.9903 3.78539 1
 4 3 0 69.8624 2.93997 24
 4 3 0 72.0874 3.81827 1
 -5 -3 0 15.6918 2.0878 21
 -5 -3 0 16.3648 2.47897 1
 -5 -3 0 18.7202 1.87905 20
 -5 -3 0 14.2719 1.7939 23
 -5 -3 0 15.1598 1.9588 14
 5 3 0 16.5388 2.5219 1
 5 3 0 14.8193 2.31789 1
 5 3 0 13.8852 1.94065 24
 -6 -3 0 26.0385 2.80125 20
 -6 -3 0 26.2522 3.46261 14
 -6 -3 0 23.2588 3.02159 1
 -6 -3 0 24.2601 2.87628 21
 6 3 0 25.1031 3.36504 1
 6 3 0 26.5547 2.68519 24
 6 3 0 22.3692 3.07081 1
 6 3 0 22.2939 2.74281 5
 -7 -3 0 2.32406 2.41226 14
 -7 -3 0 0.98865 3.22079 21
 -7 -3 0 0.16826 2.16484 1
 -7 -3 0 5.53536 2.20133 20
 7 3 0 3.8734 1.78415 18
 7 3 0 3.54238 1.91937 5
 7 3 0 3.27193 2.06854 1
 7 3 0 3.76474 2.50463 1
 7 3 0 4.13607 2.52429 24
 -8 -3 0 3.91011 3.45123 14
 -8 -3 0 -0.1127 2.63851 1
 -8 -3 0 5.19622 3.20973 20
 -8 -3 0 8.00226 3.84876 4
 8 3 0 11.5097 2.42976 18
 8 3 0 8.79645 2.7088 1
 8 3 0 4.7187 2.9326 24
 8 3 0 9.76036 2.88253 1
 9 -4 0 5.26661 3.44867 1
 9 -4 0 2.15454 3.20302 1
 9 -4 0 0.92949 4.51251 14
 9 -4 0 1.49653 2.40041 10
 9 -4 0 5.63846 3.21846 8
 9 -4 0 3.34317 3.29541 23
 -9 4 0 4.57912 3.7079 13
 -9 4 0 1.99197 2.58667 16
 -9 4 0 9.3482 3.36901 1
 8 -4 0 30.2842 3.29798 10
 8 -4 0 41.053 3.96047 1
 8 -4 0 29.8491 4.40416 8
 8 -4 0 45.1996 4.59486 1
 8 -4 0 44.8857 5.12793 23
 8 -4 0 43.3278 5.34553 14
 -8 4 0 36.8098 4.60307 13
 -8 4 0 31.634 3.0528 16
 -8 4 0 41.2271 4.4536 1
 -8 4 0 40.3149 4.31738 1
 7 -4 0 0.55015 2.18123 23
 7 -4 0 -0.8983 1.41507 10
 7 -4 0 0.46773 2.39047 14
 7 -4 0 0.74236 2.30693 1
 7 -4 0 -3.7527 2.03005 1
 -7 4 0 0.80563 2.07523 13
 -7 4 0 -2.8227 2.12147 1
 -7 4 0 0.60642 0.93126 22
 -7 4 0 -1.4728 1.51143 16
 -7 4 0 0.71414 2.4446 1
 6 -4 0 88.1138 4.51157 14
 6 -4 0 77.2296 3.02691 10
 6 -4 0 81.9711 4.59079 1
 6 -4 0 72.4381 4.64773 23
 6 -4 0 80.3396 4.53594 1
 -6 4 0 88.5266 4.70961 1
 -6 4 0 81.4535 3.87166 13
 -6 4 0 78.2783 4.57502 1
 -6 4 0 81.2064 3.04981 16
 -6 4 0 72.1649 2.16826 22
 5 -4 0 25.607 2.91263 14
 5 -4 0 28.5316 3.0549 1
 5 -4 0 27.5531 1.61484 10
 5 -4 0 27.8542 3.17551 23
 5 -4 0 26.3905 3.04233 1
 -5 4 0 26.3938 2.52962 13
 -5 4 0 31.0226 2.30824 23
 -5 4 0 24.5023 1.36047 5
 -5 4 0 30.5901 3.14164 1
 -5 4 0 26.9262 3.08099 1
 -5 4 0 27.631 1.73461 16
 4 -4 0 336.228 9.05533 4
 4 -4 0 360.479 10.0306 1
 4 -4 0 354.53 9.95971 1
 4 -4 0 344.881 9.75201 14
 4 -4 0 332.848 9.85461 23
 -4 4 0 349.37 9.99302 1
 -4 4 0 334.249 9.79047 1
 -4 4 0 342.652 8.39738 17
 -4 4 0 358.916 8.67587 16
 -4 4 0 370.471 9.77257 23
 -4 4 0 349.009 9.24251 13
 3 -4 0 13.3699 1.85251 1
 3 -4 0 19.1347 2.3571 14
 3 -4 0 14.3431 1.85352 1
 3 -4 0 14.8095 1.79469 23
 -3 4 0 15.694 1.03689 17
 -3 4 0 14.4404 1.72283 13
 -3 4 0 13.8585 1.81433 1
 -3 4 0 15.8784 1.56179 6
 -3 4 0 16.4055 1.10885 16
 -3 4 0 17.2008 1.57798 23
 -3 4 0 14.6557 1.90185 1
 2 -4 0 40.1624 1.98707 13
 2 -4 0 41.1112 2.48088 23
 2 -4 0 41.0889 2.5488 1
 2 -4 0 44.4108 1.82485 20
 2 -4 0 44.3646 2.54093 1
 -2 4 0 44.5947 2.51538 21
 -2 4 0 44.1628 1.9912 24
 -2 4 0 42.7597 2.50819 1
 -2 4 0 41.4304 1.72792 6
 -2 4 0 43.5683 2.28909 23
 -2 4 0 39.9319 2.52349 1
 -2 4 0 39.6553 2.14563 13
 1 -4 0 17.605 1.93606 13
 1 -4 0 19.0524 1.51909 20
 1 -4 0 19.0371 1.10936 24
 1 -4 0 17.3117 1.99 23
 1 -4 0 21.0474 2.07347 21
 1 -4 0 15.249 1.95915 1
 1 -4 0 16.6339 2.06451 1
 -1 4 0 18.882 1.96316 1
 -1 4 0 20.1165 2.13165 1
 -1 4 0 18.3027 1.49872 24
 -1 4 0 18.0969 1.78248 13
 -1 4 0 19.8651 1.3594 12
 -1 4 0 14.6906 1.6086 21
 -1 4 0 18.0312 1.77586 23
 0 -4 0 127.098 3.98643 21
 0 -4 0 123.607 4.04446 1
 0 -4 0 127.064 3.75967 20
 0 -4 0 127.163 3.48775 12
 0 -4 0 124.826 3.42907 3
 0 -4 0 127.049 4.16645 13
 0 -4 0 126.723 4.16933 23
 0 -4 0 121.947 4.22245 1
 0 4 0 120.942 3.9734 21
 0 4 0 132.724 3.65778 24
 0 4 0 129.489 4.08537 23
 0 4 0 121.284 4.041 1
 -1 -4 0 -0.1451 0.96511 21
 -1 -4 0 -0.2732 0.7182 20
 -1 -4 0 1.48198 1.06788 1
 1 4 0 1.61916 1.02811 24
 1 4 0 -0.2383 1.36548 1
 1 4 0 -0.1851 1.04145 21
 -2 -4 0 590.496 14.741 21
 -2 -4 0 597.684 15.2567 1
 -2 -4 0 593.794 14.7517 20
 2 4 0 587.469 14.684 24
 2 4 0 607.857 14.6327 9
 2 4 0 590.662 15.2398 1
 -3 -4 0 -0.3997 1.13299 14
 -3 -4 0 -1.1012 1.14298 23
 -3 -4 0 -1.0486 1.07712 21
 -3 -4 0 -0.643 1.13746 20
 -3 -4 0 -1.3298 1.53976 1
 3 4 0 -1.2135 0.72396 11
 3 4 0 0.83852 1.19376 24
 3 4 0 0.99339 1.61438 1
 -4 -4 0 74.6561 3.27684 8
 -4 -4 0 75.2675 3.95242 1
 -4 -4 0 81.2501 3.39455 14
 -4 -4 0 82.4897 3.59507 21
 -4 -4 0 81.9658 3.55177 23
 -4 -4 0 76.2885 3.24345 20
 4 4 0 82.0484 4.12706 1
 4 4 0 76.5689 2.10088 18
 4 4 0 77.2041 2.8031 11
 4 4 0 71.0699 3.14694 24
 -5 -4 0 74.433 4.36555 1
 -5 -4 0 78.1245 4.12925 21
 -5 -4 0 72.9419 3.51092 20
 -5 -4 0 73.827 3.6612 14
 -5 -4 0 74.6259 3.41458 8
 -5 -4 0 72.3343 3.53251 23
 5 4 0 79.4955 4.52229 1
 5 4 0 72.548 4.29506 1
 5 4 0 73.4853 3.40387 24
 5 4 0 72.1164 3.10733 11
 5 4 0 73.0094 2.31642 18
 -6 -4 0 5.29367 2.28771 1
 -6 -4 0 10.4767 2.10124 20
 -6 -4 0 11.0189 2.46549 14
 -6 -4 0 7.74757 2.5255 21
 6 4 0 11.3125 2.7225 1
 6 4 0 10.7819 2.07089 24
 6 4 0 7.77965 1.83265 11
 6 4 0 8.10708 1.22964 18
 6 4 0 8.97892 2.42601 1
 -7 -4 0 27.0882 3.11969 20
 -7 -4 0 23.2982 3.29881 1
 -7 -4 0 18.9101 3.80108 21
 -7 -4 0 24.1305 3.18812 14
 7 4 0 27.0006 3.5394 11
 7 4 0 25.8036 3.48787 1
 7 4 0 24.3448 2.65374 5
 7 4 0 33.7763 4.18748 1
 7 4 0 20.42 3.21474 24
 7 4 0 24.7666 2.23889 18
 -8 -4 0 -0.7371 2.36679 20
 -8 -4 0 -5.2117 2.36497 1
 -8 -4 0 -6.9897 3.39562 14
 8 4 0 2.11134 2.78345 11
 8 4 0 7.98026 2.82057 1
 8 4 0 -0.8842 2.44958 5
 8 4 0 -1.9341 2.73445 24
 8 4 0 -1.2316 2.45851 1
 9 -5 0 25.3872 4.94308 14
 -9 5 0 16.9997 3.82569 13
 -9 5 0 12.1876 3.39689 1
 8 -5 0 11.2454 3.45481 14
 8 -5 0 16.8838 3.52327 23
 8 -5 0 9.86938 2.93327 1
 -8 5 0 10.9438 2.96448 1
 -8 5 0 8.10007 2.7035 1
 -8 5 0 9.5068 3.49565 6
 -8 5 0 11.8154 2.99162 13
 -8 5 0 9.56819 2.10653 16
 7 -5 0 64.5626 4.65332 1
 7 -5 0 64.0307 4.36772 1
 7 -5 0 52.3859 4.21441 23
 7 -5 0 66.0539 4.71456 14
 -7 5 0 57.6979 4.41829 1
 -7 5 0 58.3862 2.99982 16
 -7 5 0 61.8051 4.66072 1
 -7 5 0 59.6764 4.48425 6
 -7 5 0 66.6169 4.25594 13
 6 -5 0 14.999 2.80614 23
 6 -5 0 14.6156 2.40238 14
 6 -5 0 13.6551 2.59949 1
 6 -5 0 18.7352 2.64959 1
 -6 5 0 15.1447 1.5781 16
 -6 5 0 15.5715 2.79183 1
 -6 5 0 14.0859 2.73844 1
 -6 5 0 15.9453 2.14495 13
 -6 5 0 11.5364 1.00733 5
 -6 5 0 13.8146 2.33419 6
 5 -5 0 80.5204 4.28339 1
 5 -5 0 77.5403 3.23018 4
 5 -5 0 74.9019 4.15232 14
 5 -5 0 74.1971 4.14558 1
 5 -5 0 74.8889 4.2938 23
 -5 5 0 78.4768 3.49448 13
 -5 5 0 79.6353 4.25514 1
 -5 5 0 80.1023 3.49774 6
 -5 5 0 75.4745 3.47802 23
 -5 5 0 80.383 4.27638 1
 4 -5 0 167.587 5.13874 4
 4 -5 0 177.548 6.07258 1
 4 -5 0 171.961 5.95362 14
 4 -5 0 173.91 6.00785 1
 4 -5 0 169.972 5.97301 23
 -4 5 0 172.137 5.54553 23
 -4 5 0 173.979 5.28524 13
 -4 5 0 175.438 6.05646 1
 -4 5 0 149.19 4.5516 16
 -4 5 0 180.217 6.05091 1
 -4 5 0 171.218 5.12428 6
 -4 5 0 171.905 4.45148 17
 3 -5 0 38.8468 2.18197 20
 3 -5 0 46.9661 2.97591 1
 3 -5 0 40.314 2.32937 13
 3 -5 0 39.1021 2.46121 14
 3 -5 0 40.8598 1.11584 22
 3 -5 0 44.0817 2.87439 1
 -3 5 0 46.0329 2.91563 21
 -3 5 0 44.2211 2.35945 13
 -3 5 0 38.5553 2.8171 1
 -3 5 0 41.9713 2.38579 23
 -3 5 0 41.4652 2.86378 1
 -3 5 0 39.9969 2.01268 6
 2 -5 0 56.3692 2.10546 6
 2 -5 0 59.1752 3.00572 1
 2 -5 0 55.4274 1.95799 7
 2 -5 0 55.2731 2.94143 23
 2 -5 0 54.8927 2.62714 13
 2 -5 0 57.6479 2.40104 20
 2 -5 0 54.9902 2.66848 1
 -2 5 0 57.2305 3.00321 21
 -2 5 0 54.0224 2.66708 13
 -2 5 0 55.6999 2.67641 1
 -2 5 0 60.4009 2.40357 24
 -2 5 0 59.5529 3.02391 1
 -2 5 0 59.2584 2.69931 23
 1 -5 0 390.287 10.2913 23
 1 -5 0 377.421 10.3391 1
 1 -5 0 385.486 10.1385 13
 1 -5 0 390.067 10.1421 21
 1 -5 0 383.315 10.2973 1
 1 -5 0 394.546 9.90711 20
 -1 5 0 383.936 10.3326 1
 -1 5 0 382.742 10.1697 13
 -1 5 0 383.659 9.65534 12
 -1 5 0 402.051 10.1992 23
 -1 5 0 375.336 10.2809 1
 -1 5 0 393.353 9.85525 24
 -1 5 0 388.322 10.1248 21
 0 -5 0 43.3937 2.72646 13
 0 -5 0 45.1634 2.44737 1
 0 -5 0 44.9684 1.74213 3
 0 -5 0 46.8133 2.7824 1
 0 -5 0 42.7845 1.86811 12
 0 -5 0 42.585 2.47577 21
 0 -5 0 47.5083 2.74138 23
 0 -5 0 46.3628 2.19016 20
 0 5 0 46.9609 2.50665 1
 0 5 0 45.2056 2.27792 23
 0 5 0 46.8367 2.15642 24
 -1 -5 0 278.243 7.52016 21
 -1 -5 0 287.379 7.46008 20
 -1 -5 0 274.104 7.84191 23
 -1 -5 0 281.639 7.9734 1
 1 5 0 271.922 7.93045 1
 1 5 0 287.486 7.35137 24
 1 5 0 280.15 7.16084 2
 1 5 0 267.036 6.91189 3
 -2 -5 0 82.4489 2.28179 18
 -2 -5 0 82.7275 3.19418 21
 -2 -5 0 88.9811 3.17162 20
 -2 -5 0 76.9937 3.72235 1
 -2 -5 0 82.0761 2.67205 2
 -2 -5 0 85.2715 2.66587 11
 2 5 0 86.4849 3.05959 24
 2 5 0 83.2133 3.50679 1
 2 5 0 84.6643 3.28863 21
 -3 -5 0 155.465 5.58625 1
 -3 -5 0 153.227 4.95803 14
 -3 -5 0 160.671 4.95343 20
 -3 -5 0 157.876 5.04412 21
 3 5 0 155.636 4.64967 15
 3 5 0 155.118 5.42723 1
 3 5 0 156.67 4.84181 24
 3 5 0 157.791 4.59116 9
 -4 -5 0 15.8694 2.08366 1
 -4 -5 0 13.5859 1.80682 14
 -4 -5 0 15.5155 2.011 21
 -4 -5 0 16.5503 2.1521 23
 -4 -5 0 14.337 1.80276 20
 4 5 0 13.3228 2.40809 1
 4 5 0 12.9583 1.87367 24
 -5 -5 0 0.52063 1.82961 21
 -5 -5 0 -1.1115 1.50427 8
 -5 -5 0 0.58859 1.30299 20
 -5 -5 0 -2.2133 1.78106 14
 -5 -5 0 -3.8017 1.77195 1
 5 5 0 1.55377 2.2919 1
 5 5 0 0.47019 1.61352 24
 5 5 0 -0.297 1.15681 11
 -6 -5 0 19.568 2.35918 8
 -6 -5 0 18.8411 2.69423 14
 -6 -5 0 18.9875 2.9146 1
 -6 -5 0 20.2412 3.10052 21
 -6 -5 0 18.3974 2.56835 20
 6 5 0 17.0365 2.90022 1
 6 5 0 17.6158 2.70251 1
 6 5 0 15.9089 1.91091 11
 -7 -5 0 5.02145 2.12247 1
 -7 -5 0 4.55119 3.94666 21
 -7 -5 0 5.78014 3.01731 14
 7 5 0 3.71826 2.54219 5
 7 5 0 6.87747 2.89728 24
 7 5 0 7.0486 2.72856 1
 7 5 0 5.26794 2.3751 1
 7 5 0 4.06774 2.0113 11
 -8 -5 0 7.34483 3.77173 14
 -8 -5 0 8.6021 3.18211 1
 -8 -5 0 6.5207 3.46054 20
 8 5 0 8.75527 3.09567 24
 8 5 0 18.2655 3.14724 1
 8 5 0 8.98985 3.15129 5
 8 5 0 8.33911 2.54743 11
 8 5 0 20.1002 3.61471 1
 8 -6 0 28.7624 3.89593 23
 8 -6 0 40.0355 4.26265 1
 8 -6 0 33.8281 4.41926 1
 8 -6 0 32.6626 4.38428 14
 -8 6 0 25.7752 3.80465 6
 -8 6 0 28.9486 2.94139 16
 -8 6 0 26.8827 3.54489 1
 -8 6 0 27.6816 3.37253 13
 -8 6 0 28.3456 3.80722 1
 7 -6 0 2.2984 2.45835 14
 7 -6 0 2.60892 2.26088 1
 7 -6 0 0.91149 2.09683 1
 7 -6 0 -2.5581 2.56855 23
 -7 6 0 0.50432 2.24892 1
 -7 6 0 2.86047 2.5489 6
 -7 6 0 0.57992 1.5833 16
 -7 6 0 -0.4266 2.26244 13
 6 -6 0 4.12506 2.32407 14
 6 -6 0 8.00441 2.36793 1
 6 -6 0 7.1148 2.29675 1
 6 -6 0 7.15108 2.73505 23
 -6 6 0 5.30394 2.05359 6
 -6 6 0 2.9466 1.40983 16
 -6 6 0 7.67407 2.44883 1
 -6 6 0 1.46708 2.09702 1
 -6 6 0 6.18792 1.9207 13
 5 -6 0 69.3343 4.32378 23
 5 -6 0 73.6003 4.23896 14
 5 -6 0 73.2843 3.33689 4
 5 -6 0 74.3268 4.31287 1
 5 -6 0 71.5199 4.25524 1
 -5 6 0 72.4341 2.32687 17
 -5 6 0 76.2981 2.7004 16
 -5 6 0 73.209 3.52786 13
 -5 6 0 75.7472 3.4275 6
 -5 6 0 75.429 4.42037 1
 -5 6 0 71.6746 4.25275 1
 -5 6 0 67.2679 3.40813 23
 4 -6 0 2.6864 1.633 1
 4 -6 0 1.00163 1.7247 14
 4 -6 0 2.79091 1.29101 20
 4 -6 0 2.86496 1.93461 23
 4 -6 0 3.532 1.48729 1
 -4 6 0 2.58596 1.4996 21
 -4 6 0 2.80685 1.44904 1
 -4 6 0 1.17455 1.56811 1
 -4 6 0 4.25556 1.1642 23
 -4 6 0 0.46413 1.12769 6
 -4 6 0 2.07582 0.92572 17
 -4 6 0 -0.1244 1.29367 13
 3 -6 0 156.036 5.01327 13
 3 -6 0 154.861 5.58491 23
 3 -6 0 156.114 4.80598 20
 3 -6 0 162.255 5.58903 1
 3 -6 0 163.563 5.44152 1
 3 -6 0 161.249 3.97304 22
 -3 6 0 159.56 5.55526 1
 -3 6 0 156.085 5.55249 1
 -3 6 0 156.514 5.03612 13
 -3 6 0 155.43 5.17822 23
 -3 6 0 158.026 5.45545 21
 2 -6 0 90.2279 3.53349 13
 2 -6 0 96.8243 3.99571 1
 2 -6 0 90.0091 3.9071 1
 2 -6 0 94.5731 3.34649 20
 2 -6 0 89.0016 3.00117 6
 -2 6 0 89.3422 3.89058 21
 -2 6 0 92.225 3.97077 1
 -2 6 0 97.1002 3.32176 24
 -2 6 0 92.9667 3.93539 1
 -2 6 0 94.8142 3.58542 23
 -2 6 0 92.776 3.22822 12
 -2 6 0 92.563 3.5812 13
 1 -6 0 0.01537 1.40887 21
 1 -6 0 2.80205 1.52348 1
 1 -6 0 0.90764 1.34819 13
 1 -6 0 0.24539 1.02529 20
 1 -6 0 1.7607 1.53955 1
 1 -6 0 -0.283 1.49176 23
 -1 6 0 3.90111 1.65929 1
 -1 6 0 2.96565 1.52766 21
 -1 6 0 1.02454 1.44985 1
 -1 6 0 3.1869 1.13287 24
 -1 6 0 2.1807 0.88464 12
 -1 6 0 3.07697 1.19563 23
 -1 6 0 3.45663 1.38852 13
 0 -6 0 32.4922 2.74338 13
 0 -6 0 34.9021 2.37629 1
 0 -6 0 33.2729 2.74799 1
 0 -6 0 38.8837 2.46367 21
 0 -6 0 33.7833 1.60009 3
 0 -6 0 33.8194 2.05249 20
 0 -6 0 34.3542 2.36078 23
 0 -6 0 34.8261 1.75886 12
 0 6 0 32.3148 2.81956 1
 0 6 0 35.7701 2.38201 23
 0 6 0 36.3502 2.0624 24
 0 6 0 33.0826 2.58708 21
 -1 -6 0 0.49582 1.47344 1
 -1 -6 0 2.93497 1.68228 13
 -1 -6 0 0.64933 1.14734 20
 -1 -6 0 0.85468 1.24935 21
 1 6 0 0.85955 1.28925 21
 1 6 0 -0.601 1.58969 1
 1 6 0 0.11271 1.16453 24
 1 6 0 0.8428 0.889 2
 -2 -6 0 101.802 4.26117 1
 -2 -6 0 99.9517 3.60926 20
 -2 -6 0 102.769 3.83705 21
 -2 -6 0 101.729 3.18958 11
 2 6 0 97.7938 3.52974 24
 2 6 0 99.8224 4.33072 1
 2 6 0 97.4606 3.77781 21
 -3 -6 0 13.932 1.77323 20
 -3 -6 0 14.4575 1.73728 21
 -3 -6 0 15.1529 1.84495 14
 -3 -6 0 15.4419 2.22213 1
 -3 -6 0 12.3278 1.48893 2
 3 6 0 12.1412 1.89955 1
 3 6 0 18.3513 1.94329 9
 3 6 0 16.3071 1.7241 24
 3 6 0 15.8458 2.05215 15
 -4 -6 0 2.72995 1.53158 23
 -4 -6 0 1.11934 2.00396 1
 -4 -6 0 2.25024 1.68239 14
 -4 -6 0 1.17815 1.65075 21
 -4 -6 0 -0.6973 1.54264 20
 4 6 0 -2.53 1.34223 24
 4 6 0 -1.6585 2.00633 1
 -5 -6 0 3.53448 2.33019 1
 -5 -6 0 4.37566 2.00927 8
 -5 -6 0 6.31897 2.05361 20
 -5 -6 0 6.66286 2.17477 14
 -5 -6 0 8.17321 2.55339 21
 5 6 0 7.76265 2.11984 1
 5 6 0 6.40682 1.88567 24
 -6 -6 0 12.8396 2.70761 14
 -6 -6 0 15.1279 3.53049 21
 -6 -6 0 10.3295 2.36122 20
 -6 -6 0 15.7599 2.46107 8
 -6 -6 0 8.96973 2.80423 1
 6 6 0 12.3276 2.63499 1
 6 6 0 13.2879 2.77239 24
 6 6 0 18.4299 3.17941 1
 -7 -6 0 -2.8538 2.87368 14
 -7 -6 0 -3.0121 2.56397 1
 -7 -6 0 -1.3444 2.89602 20
 -7 -6 0 4.23804 4.54638 21
 7 6 0 0.586 2.7308 24
 7 6 0 0.65928 2.19155 1
 7 6 0 1.92418 2.53762 1
 7 6 0 -3.5944 2.8348 5
 8 -7 0 3.32392 3.17493 14
 8 -7 0 -5.4177 2.60079 1
 8 -7 0 0.75931 3.40509 23
 8 -7 0 2.09127 2.82158 1
 -8 7 0 -1.662 3.3977 21
 -8 7 0 0.29339 2.79169 1
 -8 7 0 -2.6001 2.87584 13
 -8 7 0 -1.5619 3.18302 6
 -8 7 0 7.29174 2.97562 1
 7 -7 0 9.85984 2.49261 1
 7 -7 0 5.02167 2.3246 1
 7 -7 0 7.04594 3.12174 23
 7 -7 0 3.53042 2.56917 14
 -7 7 0 6.64346 2.4899 13
 -7 7 0 6.10623 2.48732 6
 -7 7 0 6.11797 3.23281 21
 -7 7 0 0.85744 2.18358 1
 -7 7 0 4.1089 0.85731 5
 -7 7 0 7.78277 2.57131 1
 6 -7 0 81.2617 3.87852 4
 6 -7 0 86.2354 5.27814 23
 6 -7 0 99.1725 5.18783 14
 6 -7 0 89.2277 4.84248 1
 6 -7 0 82.3213 4.92622 1
 -6 7 0 84.1749 4.34147 13
 -6 7 0 86.4744 4.11096 6
 -6 7 0 85.1768 5.06311 1
 -6 7 0 92.7348 5.25358 21
 -6 7 0 86.5839 4.99161 1
 5 -7 0 -0.456 1.99427 14
 5 -7 0 0.31847 2.129 1
 5 -7 0 -0.8819 2.19662 23
 5 -7 0 -1.2744 1.60217 20
 5 -7 0 1.35066 1.98055 1
 5 -7 0 1.16011 1.58456 4
 -5 7 0 -0.3281 1.44393 6
 -5 7 0 0.02703 1.99619 1
 -5 7 0 -1.7951 1.66246 13
 -5 7 0 1.11305 2.26257 21
 -5 7 0 0.39998 1.06656 17
 -5 7 0 -2.04 1.86015 1
 4 -7 0 26.2324 2.26588 20
 4 -7 0 23.9259 2.5024 13
 4 -7 0 23.2392 2.83004 23
 4 -7 0 22.4557 2.46015 1
 4 -7 0 24.9482 2.93245 1
 4 -7 0 23.6046 2.7099 14
 -4 7 0 28.3244 1.98964 17
 -4 7 0 24.9904 2.49197 1
 -4 7 0 23.4229 2.65559 13
 -4 7 0 26.2449 3.01198 1
 -4 7 0 26.7598 1.91634 23
 -4 7 0 22.2799 2.63641 21
 3 -7 0 -1.1633 1.83448 23
 3 -7 0 -0.5321 1.35411 13
 3 -7 0 -0.0057 0.839 7
 3 -7 0 0.06366 1.66741 1
 3 -7 0 1.04442 1.20151 1
 3 -7 0 2.16532 1.08786 20
 -3 7 0 -1.7054 1.36612 13
 -3 7 0 -1.5059 1.59612 1
 -3 7 0 -0.0608 1.30465 1
 -3 7 0 0.67236 1.3017 24
 -3 7 0 0.04108 1.38315 21
 -3 7 0 1.26996 1.09433 23
 2 -7 0 46.0359 2.44997 20
 2 -7 0 48.0232 2.97504 13
 2 -7 0 47.2286 2.15787 6
 2 -7 0 47.4082 2.78107 1
 2 -7 0 44.7021 3.26502 23
 2 -7 0 45.0973 3.10144 1
 -2 7 0 45.2147 2.43371 24
 -2 7 0 43.1456 3.2019 21
 -2 7 0 43.116 3.0546 1
 -2 7 0 46.8326 3.14827 1
 -2 7 0 49.6203 2.34714 12
 -2 7 0 45.241 2.79831 13
 -2 7 0 47.4219 2.45086 23
 1 -7 0 15.3828 2.14457 1
 1 -7 0 14.003 1.61553 20
 1 -7 0 15.0375 1.93104 23
 1 -7 0 14.281 2.08855 1
 1 -7 0 15.0604 1.85009 13
 1 -7 0 17.2795 1.91794 21
 -1 7 0 13.8879 1.67564 24
 -1 7 0 13.8608 1.69037 23
 -1 7 0 15.7927 0.95413 7
 -1 7 0 13.6754 2.08339 1
 -1 7 0 16.2412 1.76208 21
 -1 7 0 13.0944 2.08598 1
 0 -7 0 30.553 1.88571 20
 0 -7 0 28.1897 2.94369 23
 0 -7 0 34.2057 2.54479 21
 0 -7 0 31.5712 2.88642 13
 0 -7 0 31.7474 2.87002 1
 0 -7 0 29.9437 2.76917 1
 0 -7 0 33.1124 1.64593 3
 0 -7 0 33.0414 1.82348 12
 0 7 0 32.558 2.74732 21
 0 7 0 31.2164 2.40202 23
 0 7 0 29.637 2.9271 1
 0 7 0 29.4524 2.123 24
 -1 -7 0 16.5861 1.55677 20
 -1 -7 0 15.6957 2.14807 13
 -1 -7 0 14.219 2.24599 23
 -1 -7 0 15.658 1.78748 21
 -1 -7 0 15.5576 2.11364 1
 -1 -7 0 15.2581 2.15145 1
 1 7 0 14.9558 2.17862 1
 1 7 0 13.8874 1.8712 21
 1 7 0 18.0087 1.57667 24
 1 7 0 16.5781 1.75004 2
 -2 -7 0 62.2592 3.73995 23
 -2 -7 0 61.283 3.07507 21
 -2 -7 0 61.806 3.63889 1
 -2 -7 0 61.6116 2.55348 11
 -2 -7 0 56.5284 2.8615 20
 2 7 0 58.7687 2.21308 3
 2 7 0 54.4874 3.58858 1
 2 7 0 62.9162 2.66162 24
 2 7 0 60.7539 3.22174 21
 -3 -7 0 22.3415 2.28958 20
 -3 -7 0 24.9151 2.65472 21
 -3 -7 0 18.7397 2.52784 1
 -3 -7 0 21.9903 2.57736 14
 3 7 0 21.497 2.30568 9
 3 7 0 23.7397 2.60165 21
 3 7 0 25.7615 2.25938 24
 3 7 0 22.7244 2.55839 15
 3 7 0 25.3677 3.17552 1
 -4 -7 0 12.3542 2.18157 14
 -4 -7 0 10.728 1.39143 2
 -4 -7 0 7.2752 2.30963 1
 -4 -7 0 8.2871 1.9964 20
 -4 -7 0 13.1129 2.39359 21
 4 7 0 7.53814 2.02527 1
 4 7 0 11.9553 2.01593 24
 4 7 0 11.1935 1.56651 9
 -5 -7 0 15.0141 2.40697 1
 -5 -7 0 20.7664 2.69686 14
 -5 -7 0 15.9115 2.38871 20
 -5 -7 0 17.6565 2.39057 2
 -5 -7 0 17.2308 2.60251 8
 -5 -7 0 21.4641 3.12363 21
 5 7 0 20.2357 3.10959 1
 5 7 0 12.1402 2.2326 24
 -6 -7 0 1.69976 2.45526 1
 -6 -7 0 0.67776 2.25317 20
 -6 -7 0 -1.8603 3.65468 21
 -6 -7 0 -2.4161 2.61397 14
 -6 -7 0 2.28034 2.40246 8
 6 7 0 1.56247 2.25733 1
 6 7 0 -4.8708 2.50837 1
 6 7 0 3.02901 2.63463 24
 -7 -7 0 4.92506 3.15464 20
 -7 -7 0 7.75844 3.57844 14
 -7 -7 0 5.1558 2.82511 1
 -7 -7 0 -0.1818 5.21733 21
 7 7 0 7.43943 2.85743 1
 7 7 0 7.70425 3.30883 1
 7 7 0 10.8816 2.9538 24
 8 -8 0 1.58493 3.19613 23
 8 -8 0 7.9359 3.17283 1
 8 -8 0 2.5068 3.59831 14
 8 -8 0 3.11937 2.85872 1
 -8 8 0 12.5575 3.83124 21
 -8 8 0 5.47226 3.3697 6
 -8 8 0 1.43939 2.96382 1
 -8 8 0 2.79786 2.94501 1
 -8 8 0 -0.8053 3.18437 13
 7 -8 0 2.90843 2.13766 20
 7 -8 0 -0.0141 3.04765 23
 7 -8 0 -0.3535 2.61686 14
 7 -8 0 3.40181 2.24433 1
 7 -8 0 2.79694 2.42446 1
 -7 8 0 -1.0632 2.43745 1
 -7 8 0 -1.1993 2.50716 13
 -7 8 0 1.90362 2.46987 6
 -7 8 0 -1.6877 3.03475 21
 -7 8 0 1.4853 2.58578 1
 6 -8 0 50.2372 3.59001 4
 6 -8 0 42.3491 3.34126 20
 6 -8 0 50.225 4.62647 23
 6 -8 0 52.4943 4.48974 14
 6 -8 0 50.5464 3.68876 1
 6 -8 0 47.5977 4.17392 1
 -6 8 0 54.1135 4.7023 21
 -6 8 0 46.8112 3.79909 13
 -6 8 0 52.9416 3.5734 6
 -6 8 0 47.6766 4.16782 1
 -6 8 0 47.4445 2.1353 17
 -6 8 0 42.8695 3.67481 1
 5 -8 0 4.89755 2.02371 14
 5 -8 0 6.3887 2.65977 23
 5 -8 0 8.99765 2.02616 1
 5 -8 0 3.85501 1.83821 20
 5 -8 0 7.18159 2.18893 1
 -5 8 0 4.47096 2.31987 21
 -5 8 0 6.80414 2.29372 1
 -5 8 0 6.158 1.95379 1
 -5 8 0 6.26625 1.40849 17
 -5 8 0 4.97963 1.89323 13
 4 -8 0 164.584 5.66209 13
 4 -8 0 159.083 6.22472 14
 4 -8 0 155.713 4.82476 7
 4 -8 0 155.051 5.2239 20
 4 -8 0 154.272 3.87059 22
 4 -8 0 160.583 5.9475 1
 4 -8 0 143.995 6.19089 23
 4 -8 0 162.384 6.23436 1
 -4 8 0 157.215 6.15997 21
 -4 8 0 160.996 5.95471 1
 -4 8 0 156.828 5.61645 13
 -4 8 0 151.901 5.46539 23
 -4 8 0 159.002 6.22392 1
 3 -8 0 28.3089 3.311 23
 3 -8 0 33.3439 2.71357 13
 3 -8 0 30.493 2.35728 20
 3 -8 0 30.7682 2.68338 1
 3 -8 0 29.2381 3.00353 1
 -3 8 0 26.1214 3.24467 21
 -3 8 0 28.5113 2.73512 13
 -3 8 0 27.6889 2.23808 23
 -3 8 0 31.852 2.69771 1
 -3 8 0 30.9921 2.10645 24
 -3 8 0 28.6592 2.30994 12
 -3 8 0 31.4085 3.13691 1
 2 -8 0 140.187 5.19217 13
 2 -8 0 146.614 4.48857 6
 2 -8 0 141.737 5.59753 23
 2 -8 0 139.876 4.79736 20
 2 -8 0 146.488 5.33792 1
 2 -8 0 142.095 5.50205 1
 -2 8 0 145.778 5.24649 13
 -2 8 0 147.696 4.57473 12
 -2 8 0 140.499 5.36952 1
 -2 8 0 148.615 4.72716 24
 -2 8 0 144.487 5.43559 21
 -2 8 0 147.628 5.04051 23
 -2 8 0 147.875 5.59355 1
 1 -8 0 239.393 7.24488 21
 1 -8 0 233.323 7.58697 23
 1 -8 0 237.724 7.37205 13
 1 -8 0 241.579 7.65662 1
 1 -8 0 235.723 6.86898 20
 1 -8 0 232.756 7.55981 1
 -1 8 0 235.397 7.15702 23
 -1 8 0 235.318 7.61498 1
 -1 8 0 228.557 5.84495 7
 -1 8 0 237.513 7.67193 1
 -1 8 0 228.445 6.78111 24
 -1 8 0 229.204 7.30945 21
 0 -8 0 -0.929 1.59707 1
 0 -8 0 0.6318 1.68207 1
 0 -8 0 0.17446 1.68342 13
 0 -8 0 1.51849 1.33035 20
 0 -8 0 0.03816 1.38006 21
 0 -8 0 0.18822 0.95282 12
 0 -8 0 1.40646 1.95111 23
 0 -8 0 0.32384 0.82851 3
 0 8 0 -1.2681 1.27246 24
 0 8 0 -1.0721 1.19142 23
 0 8 0 0.81248 1.78138 1
 0 8 0 -0.9994 1.24696 2
 0 8 0 0.82332 1.61985 21
 -1 -8 0 166.725 6.07738 13
 -1 -8 0 156.192 5.10812 20
 -1 -8 0 168.32 5.59603 21
 -1 -8 0 156.665 5.78621 23
 -1 -8 0 156.395 5.73142 1
 -1 -8 0 168.932 6.06364 1
 1 8 0 163.78 6.08628 1
 1 8 0 158.879 5.15574 24
 1 8 0 162.559 5.60886 21
 1 8 0 163.927 5.0008 2
 -2 -8 0 -3.0741 1.36446 20
 -2 -8 0 -2.7955 1.93943 23
 -2 -8 0 0.42067 1.10939 11
 -2 -8 0 -2.8008 1.67919 1
 -2 -8 0 -0.6593 1.4571 21
 -2 -8 0 -1.2591 1.45835 13
 2 8 0 -1.2467 1.40383 24
 2 8 0 -3.7622 1.70435 1
 2 8 0 -2.4608 1.62715 21
 -3 -8 0 4.47443 2.08896 23
 -3 -8 0 5.47534 1.95901 21
 -3 -8 0 6.20205 1.797 20
 -3 -8 0 7.31065 2.18541 1
 3 8 0 5.66279 1.87784 21
 3 8 0 4.43593 2.18361 1
 3 8 0 6.01914 1.76076 9
 3 8 0 6.16106 1.77373 24
 3 8 0 5.17051 1.82524 15
 -4 -8 0 8.16102 2.1278 20
 -4 -8 0 9.68958 2.28512 14
 -4 -8 0 10.006 2.52869 21
 -4 -8 0 10.1709 2.4232 1
 4 8 0 7.83452 2.5848 1
 4 8 0 8.68176 2.05758 24
 4 8 0 11.2649 1.97302 15
 4 8 0 8.42339 1.7771 9
 -5 -8 0 5.04326 1.92487 1
 -5 -8 0 5.19424 1.47582 2
 -5 -8 0 3.76679 2.03137 20
 -5 -8 0 8.73635 3.29555 21
 -5 -8 0 5.22682 2.36167 14
 5 8 0 5.73509 2.71483 1
 5 8 0 4.99619 2.62471 24
 -6 -8 0 12.8376 3.16267 8
 -6 -8 0 13.5319 2.89233 1
 -6 -8 0 11.6276 2.00919 2
 -6 -8 0 11.9278 3.16453 14
 -6 -8 0 13.0378 4.39825 21
 6 8 0 16.5586 3.34062 1
 6 8 0 14.8854 3.29369 24
 -7 -8 0 6.52827 2.39296 2
 -7 -8 0 8.3295 3.37071 1
 -7 -8 0 9.67271 3.44076 8
 -7 -8 0 9.30198 3.86581 14
 -7 -8 0 1.85527 3.13497 20
 7 8 0 6.62039 3.01251 24
 7 8 0 4.13877 3.00413 1
 7 8 0 15.2584 3.56751 1
 8 -9 0 10.4431 3.51974 1
 8 -9 0 6.56384 3.75194 14
 8 -9 0 0.30338 3.00451 1
 8 -9 0 5.28611 3.64907 23
 8 -9 0 3.71776 3.28915 20
 -8 9 0 4.39726 3.75932 21
 -8 9 0 2.5172 3.12615 1
 -8 9 0 15.281 3.69544 1
 -8 9 0 4.38723 3.43017 13
 -8 9 0 6.08313 3.46316 6
 7 -9 0 0.80443 2.50429 1
 7 -9 0 1.99361 2.40277 4
 7 -9 0 0.03096 2.38822 1
 7 -9 0 3.91017 2.90081 14
 7 -9 0 0.21306 3.25501 23
 -7 9 0 -2.5488 2.45469 1
 -7 9 0 3.60658 2.88328 13
 -7 9 0 2.66519 3.13569 21
 -7 9 0 7.41059 2.76677 1
 6 -9 0 16.9358 3.04438 1
 6 -9 0 8.0769 2.42563 1
 6 -9 0 11.5358 2.33522 20
 6 -9 0 12.913 2.50324 4
 6 -9 0 12.0261 3.23109 23
 6 -9 0 14.8548 3.02097 14
 -6 9 0 19.6586 3.39666 21
 -6 9 0 17.4739 2.92185 1
 -6 9 0 11.8489 2.69584 13
 -6 9 0 14.2192 1.67949 17
 -6 9 0 12.6381 2.7817 1
 5 -9 0 93.4239 5.18662 1
 5 -9 0 98.3498 5.07847 1
 5 -9 0 86.8259 5.39798 23
 5 -9 0 94.1322 5.26543 14
 5 -9 0 90.7668 4.01473 7
 5 -9 0 88.8255 4.27668 20
 -5 9 0 87.1108 4.75761 13
 -5 9 0 90.1352 5.28172 1
 -5 9 0 99.3776 5.24816 1
 -5 9 0 93.5237 5.42186 21
 -5 9 0 93.2994 3.78861 17
 4 -9 0 49.7671 3.21923 20
 4 -9 0 48.7345 3.47897 1
 4 -9 0 47.6146 2.39476 7
 4 -9 0 47.8976 1.64213 19
 4 -9 0 51.6843 3.84291 1
 4 -9 0 48.5841 4.28956 23
 4 -9 0 49.8115 1.68759 19
 4 -9 0 49.433 1.84244 22
 4 -9 0 51.4806 3.87285 13
 -4 9 0 46.3251 4.2142 21
 -4 9 0 48.3866 3.76416 13
 -4 9 0 56.2747 4.07051 1
 -4 9 0 46.3293 3.5271 12
 -4 9 0 47.1652 3.44978 1
 -4 9 0 46.3745 1.76262 10
 3 -9 0 173.659 6.2454 1
 3 -9 0 166.524 5.06356 6
 3 -9 0 158.904 5.52561 20
 3 -9 0 167.017 6.5467 23
 3 -9 0 165.264 6.35364 1
 3 -9 0 169.226 6.07387 13
 -3 9 0 157.576 6.29356 21
 -3 9 0 171.789 6.40052 1
 -3 9 0 160.576 5.41504 24
 -3 9 0 172.684 6.17386 13
 -3 9 0 167.839 5.43877 12
 -3 9 0 161.279 5.74822 23
 -3 9 0 169.203 6.27276 1
 2 -9 0 187.583 5.65789 6
 2 -9 0 186.533 6.90249 23
 2 -9 0 184.622 5.97979 20
 2 -9 0 188.297 6.81946 1
 2 -9 0 193.845 6.53881 13
 2 -9 0 196.054 6.9147 1
 -2 9 0 191.76 5.67278 12
 -2 9 0 195.96 6.99858 1
 -2 9 0 186.772 5.99895 24
 -2 9 0 191.931 6.90087 1
 -2 9 0 187.312 6.68823 21
 -2 9 0 185.543 6.21636 23
 1 -9 0 -0.6855 1.81408 1
 1 -9 0 -1.8361 1.57041 21
 1 -9 0 0.24659 1.04472 20
 1 -9 0 1.56427 1.71033 23
 1 -9 0 -1.2306 1.70005 13
 1 -9 0 -1.3095 1.64248 1
 -1 9 0 -0.1519 1.90222 1
 -1 9 0 1.37932 1.44067 24
 -1 9 0 -0.5664 1.24813 23
 -1 9 0 1.03398 1.45061 21
 0 -9 0 203.551 6.79437 21
 0 -9 0 207.231 5.862 12
 0 -9 0 208.582 6.50492 20
 0 -9 0 205.619 7.22148 1
 0 -9 0 209.329 7.18705 13
 0 -9 0 204.662 7.24067 1
 0 -9 0 213.199 7.32055 23
 0 9 0 214.382 6.5478 2
 0 9 0 216.098 7.3732 1
 0 9 0 217.15 6.97056 21
 0 9 0 210.065 6.41806 24
 -1 -9 0 102.714 4.84099 1
 -1 -9 0 105.339 4.50483 21
 -1 -9 0 103.21 4.97274 13
 -1 -9 0 103.893 4.15192 20
 -1 -9 0 108.619 5.14631 23
 -1 -9 0 105.933 5.0014 1
 1 9 0 110.872 5.08738 1
 1 9 0 104.528 3.96024 2
 1 9 0 104.06 4.6029 21
 1 9 0 101.609 4.03826 24
 -2 -9 0 70.7666 3.62465 20
 -2 -9 0 67.7625 4.4933 23
 -2 -9 0 79.3773 3.31341 11
 -2 -9 0 78.1082 4.64939 13
 -2 -9 0 71.8847 4.06889 21
 -2 -9 0 71.639 4.26167 1
 2 9 0 72.1754 4.03272 21
 2 9 0 74.8436 3.28209 24
 2 9 0 68.7199 4.33026 1
 -3 -9 0 73.9134 3.86434 20
 -3 -9 0 78.6091 4.60144 1
 -3 -9 0 76.6961 4.89103 23
 -3 -9 0 82.6278 4.50313 21
 -3 -9 0 82.9113 4.92955 13
 3 9 0 77.5845 4.43598 15
 3 9 0 74.9613 4.74951 1
 3 9 0 75.208 2.90994 3
 3 9 0 80.0821 4.33392 21
 3 9 0 77.2711 3.758 24
 3 9 0 78.7171 4.26568 9
 -4 -9 0 0.0005 2.60088 21
 -4 -9 0 -3.0877 2.05306 1
 -4 -9 0 -2.2995 2.04457 14
 -4 -9 0 2.61456 2.06108 20
 4 9 0 0.6988 1.88315 9
 4 9 0 -0.3862 1.94869 15
 4 9 0 -0.4724 2.37897 1
 -5 -9 0 3.91923 3.56224 21
 -5 -9 0 6.00833 2.58516 1
 -5 -9 0 5.67193 2.88163 14
 -5 -9 0 5.1042 2.2762 20
 5 9 0 4.39501 2.85217 24
 5 9 0 6.91887 2.84293 1
 -6 -9 0 28.6598 4.11538 8
 -6 -9 0 28.1548 5.32545 21
 -6 -9 0 28.7418 3.92305 20
 -6 -9 0 31.257 3.89806 14
 -6 -9 0 30.6006 3.92227 1
 6 9 0 27.8809 3.59941 24
 7 -10 0 23.7196 3.21313 4
 7 -10 0 17.8437 3.97391 23
 7 -10 0 33.7117 4.1097 1
 7 -10 0 36.5686 4.46542 1
 7 -10 0 24.4183 3.72151 20
 7 -10 0 26.1115 3.76149 14
 -7 10 0 27.4935 3.51865 1
 -7 10 0 23.0952 3.68362 13
 -7 10 0 32.5185 4.28336 21
 6 -10 0 84.3706 4.7784 1
 6 -10 0 78.9786 4.44043 7
 6 -10 0 71.9799 4.98575 4
 6 -10 0 79.1027 4.33729 20
 6 -10 0 86.7083 5.84243 23
 6 -10 0 79.6872 5.21499 1
 6 -10 0 83.5294 5.50435 14
 -6 10 0 71.9693 5.16681 13
 -6 10 0 70.1924 3.5602 17
 -6 10 0 80.7978 5.82659 21
 -6 10 0 68.6818 5.04417 1
 -6 10 0 72.3975 4.54511 1
 5 -10 0 2.99849 2.62819 14
 5 -10 0 7.94517 3.123 23
 5 -10 0 5.89663 1.40124 19
 5 -10 0 5.82063 1.15222 19
 5 -10 0 5.13684 1.6158 7
 5 -10 0 6.59935 2.13592 1
 5 -10 0 7.79906 2.72453 1
 5 -10 0 7.25365 2.21662 20
 5 -10 0 5.40564 2.42747 13
 -5 10 0 9.53711 2.592 1
 -5 10 0 7.04084 2.06226 17
 -5 10 0 8.50414 2.89674 21
 -5 10 0 5.26043 2.45422 13
 -5 10 0 7.86331 2.23698 1
 -5 10 0 3.51617 2.53206 12
 4 -10 0 25.8596 3.41988 13
 4 -10 0 20.9113 2.71587 1
 4 -10 0 23.3403 1.87106 22
 4 -10 0 22.7219 2.9052 1
 4 -10 0 23.6443 2.24696 20
 4 -10 0 23.551 3.54121 23
 -4 10 0 21.6389 2.81836 13
 -4 10 0 22.5452 2.93557 1
 -4 10 0 24.6625 3.13189 12
 -4 10 0 22.0522 2.94695 1
 -4 10 0 22.6489 3.2537 21
 3 -10 0 64.7927 3.55712 20
 3 -10 0 69.8798 4.14589 13
 3 -10 0 74.5991 4.56284 1
 3 -10 0 69.6365 4.31319 1
 3 -10 0 71.8308 3.25839 6
 3 -10 0 65.3034 4.73745 23
 -3 10 0 72.8343 4.42672 1
 -3 10 0 68.6797 3.58483 12
 -3 10 0 71.5409 3.62736 24
 -3 10 0 61.505 4.56393 21
 -3 10 0 75.0805 4.56112 13
 -3 10 0 77.6178 4.69775 1
 2 -10 0 -1.078 1.38978 6
 2 -10 0 0.34391 2.03642 1
 2 -10 0 1.98683 1.92528 13
 2 -10 0 1.57006 2.0071 1
 2 -10 0 0.28368 1.57862 20
 2 -10 0 -0.546 2.45698 23
 -2 10 0 -2.6867 2.05069 1
 -2 10 0 1.3347 2.28351 21
 -2 10 0 0.64037 2.07753 1
 -2 10 0 -4.4878 1.61708 24
 1 -10 0 104.859 5.03064 13
 1 -10 0 111.698 5.33885 23
 1 -10 0 107.612 3.98579 3
 1 -10 0 114.292 4.94607 1
 1 -10 0 105.956 4.28942 20
 1 -10 0 114.264 5.1615 1
 1 -10 0 102.956 4.85472 21
 -1 10 0 102.648 4.83171 1
 -1 10 0 109.553 4.14941 24
 -1 10 0 110.203 5.08926 21
 -1 10 0 105.272 4.31855 23
 0 -10 0 133.009 4.96644 20
 0 -10 0 138.563 5.79818 1
 0 -10 0 131.805 5.42205 21
 0 -10 0 136.079 5.94577 23
 0 -10 0 132.243 5.50907 1
 0 -10 0 131.46 4.28518 12
 0 -10 0 136.326 5.49036 13
 0 10 0 135.682 5.59673 1
 0 10 0 135.82 5.6773 21
 0 10 0 140.065 5.14028 2
 0 10 0 130.556 4.70942 24
 -1 -10 0 10.906 2.50875 1
 -1 -10 0 10.2014 2.4323 1
 -1 -10 0 11.6432 2.77366 23
 -1 -10 0 8.48832 1.57627 12
 -1 -10 0 8.56278 2.25656 21
 -1 -10 0 8.75932 1.96563 20
 -1 -10 0 10.3765 2.14285 13
 1 10 0 14.5267 2.23251 24
 1 10 0 12.4555 2.35954 21
 1 10 0 10.9603 1.76254 2
 1 10 0 12.0428 2.57578 1
 -2 -10 0 178.809 7.00314 1
 -2 -10 0 179.168 5.75202 11
 -2 -10 0 152.478 6.68427 1
 -2 -10 0 172.799 6.6813 21
 -2 -10 0 170.167 6.11478 20
 -2 -10 0 181.972 7.15092 13
 -2 -10 0 180.84 6.86122 23
 2 10 0 173.368 5.95562 24
 2 10 0 178.849 7.14092 1
 2 10 0 185.554 6.58265 21
 -3 -10 0 21.2025 3.30124 21
 -3 -10 0 23.8997 2.98925 1
 -3 -10 0 19.1812 2.5604 20
 -3 -10 0 18.6025 2.91196 13
 -3 -10 0 19.2244 3.18561 23
 3 10 0 19.0319 2.81119 9
 3 10 0 21.4138 2.62227 24
 3 10 0 20.3709 2.90621 15
 3 10 0 19.0088 3.07001 1
 3 10 0 16.9507 2.77252 21
 -4 -10 0 27.5292 3.87223 23
 -4 -10 0 24.5518 3.31721 13
 -4 -10 0 27.7496 3.77074 21
 -4 -10 0 31.7993 3.48863 14
 -4 -10 0 22.6357 2.97886 1
 -4 -10 0 27.903 2.77523 20
 4 10 0 25.511 3.29982 24
 4 10 0 32.271 4.14678 15
 4 10 0 28.1335 3.56111 1
 4 10 0 30.0741 3.87562 9
 4 10 0 25.2728 2.67016 3
 -5 -10 0 41.4524 4.47828 1
 -5 -10 0 43.8674 4.41401 20
 -5 -10 0 40.0741 5.25434 21
 -5 -10 0 45.9266 5.42688 14
 -5 -10 0 49.8394 5.1949 13
 5 10 0 44.9918 4.74107 1
 5 10 0 44.3484 4.36682 24
 -6 -10 0 6.7902 3.72347 14
 -6 -10 0 3.05101 4.09433 8
 -6 -10 0 3.07697 2.45995 1
 -6 -10 0 6.64975 3.26189 20
 -6 -10 0 -1.0477 3.71702 13
 6 10 0 5.88367 3.407 24
 6 10 0 4.42085 3.37431 1
 7 -11 0 2.36865 3.06695 14
 7 -11 0 10.3867 3.47606 20
 7 -11 0 7.91171 3.10821 7
 7 -11 0 8.12087 3.01094 1
 7 -11 0 6.74046 3.54641 23
 7 -11 0 7.8145 3.33314 4
 -7 11 0 2.45775 2.9828 1
 -7 11 0 6.25687 3.61028 13
 -7 11 0 12.1756 3.88261 21
 -7 11 0 2.51628 2.73317 1
 6 -11 0 3.73218 1.50536 19
 6 -11 0 5.81054 2.36093 1
 6 -11 0 5.97611 2.90229 1
 6 -11 0 2.81147 3.40402 23
 6 -11 0 5.13703 2.66753 14
 6 -11 0 4.40371 2.12192 7
 -6 11 0 0.13625 3.25319 21
 -6 11 0 6.38368 3.15579 13
 -6 11 0 3.79578 2.1439 17
 -6 11 0 -0.3829 2.6625 1
 -6 11 0 2.58081 3.09231 12
 -6 11 0 11.1724 2.76356 1
 5 -11 0 20.6297 2.91564 14
 5 -11 0 19.9948 3.24865 1
 5 -11 0 19.2886 2.75733 20
 5 -11 0 19.1252 3.59081 23
 5 -11 0 22.1135 3.26364 13
 5 -11 0 20.7326 3.04822 1
 -5 11 0 22.4764 3.586 21
 -5 11 0 25.4947 2.79909 17
 -5 11 0 20.4392 3.37103 13
 -5 11 0 26.7957 3.40538 1
 -5 11 0 24.0071 3.34556 1
 -5 11 0 22.19 3.2019 12
 4 -11 0 50.0027 4.94019 23
 4 -11 0 52.2483 2.63517 22
 4 -11 0 47.4103 3.35123 20
 4 -11 0 47.5034 3.58658 1
 4 -11 0 53.0538 4.37112 13
 4 -11 0 55.1151 4.50571 1
 -4 11 0 53.9513 4.73378 21
 -4 11 0 51.4563 4.78986 13
 -4 11 0 56.4966 4.32955 1
 -4 11 0 52.1746 3.8802 12
 -4 11 0 55.6296 4.43547 1
 3 -11 0 1.90366 1.72513 20
 3 -11 0 -0.9197 2.16934 1
 3 -11 0 -0.2814 2.40393 13
 3 -11 0 -2.39 2.51613 23
 3 -11 0 0.05445 1.55669 6
 3 -11 0 2.90738 2.26438 1
 -3 11 0 3.35776 2.25243 1
 -3 11 0 -2.5139 1.85926 24
 -3 11 0 -2.3733 2.46724 21
 -3 11 0 0.13083 2.2047 1
 -3 11 0 2.31112 1.76162 12
 2 -11 0 53.3063 4.06789 1
 2 -11 0 49.0793 3.29722 20
 2 -11 0 45.5735 4.54012 23
 2 -11 0 53.9764 4.14914 1
 2 -11 0 55.8196 4.2491 13
 2 -11 0 54.7261 3.31121 6
 -2 11 0 54.4207 4.34058 1
 -2 11 0 55.144 4.23996 1
 -2 11 0 54.5061 4.45735 21
 -2 11 0 52.4492 3.38989 24
 1 -11 0 143.141 4.69187 3
 1 -11 0 141.467 6.30228 23
 1 -11 0 146.158 6.12064 13
 1 -11 0 125.793 6.03165 1
 1 -11 0 146.373 6.10773 1
 1 -11 0 128.912 5.73302 21
 1 -11 0 137.583 5.17754 20
 -1 11 0 140.055 5.19728 24
 -1 11 0 139.501 5.99547 21
 -1 11 0 122.098 6.02402 1
 0 -11 0 3.23303 2.27055 13
 0 -11 0 2.98155 1.85383 20
 0 -11 0 3.22886 2.18443 1
 0 -11 0 -1.4754 2.29345 21
 0 -11 0 5.82584 2.26543 1
 0 -11 0 3.59927 2.59613 23
 0 11 0 5.76153 2.30292 1
 0 11 0 4.44456 2.0384 2
 0 11 0 4.09694 1.92124 24
 0 11 0 3.26554 2.1968 21
 -1 -11 0 127.254 6.00699 1
 -1 -11 0 133.523 4.56559 12
 -1 -11 0 135.909 6.04028 1
 -1 -11 0 119.892 4.88848 20
 -1 -11 0 142.526 6.20539 13
 -1 -11 0 134.878 5.99575 23
 -1 -11 0 135.434 6.01703 21
 1 11 0 136.722 4.96924 2
 1 11 0 129.848 5.06616 24
 1 11 0 133.333 6.17296 1
 1 11 0 142.193 5.9312 21
 -2 -11 0 42.6036 3.62012 13
 -2 -11 0 37.3173 3.8335 1
 -2 -11 0 36.4918 4.55829 21
 -2 -11 0 36.8863 4.58199 23
 -2 -11 0 38.6593 3.97379 1
 -2 -11 0 44.94 3.35244 11
 -2 -11 0 34.5087 3.27842 20
 2 11 0 43.6211 4.16085 21
 2 11 0 46.2585 4.33226 1
 2 11 0 43.7923 3.15599 24
 -3 -11 0 54.5549 4.86821 13
 -3 -11 0 50.0031 5.69632 21
 -3 -11 0 54.6069 5.15664 23
 -3 -11 0 58.3283 3.97791 20
 -3 -11 0 59.5389 4.55635 1
 3 11 0 54.8366 4.50993 1
 3 11 0 57.6315 4.99258 21
 3 11 0 63.462 4.35183 24
 3 11 0 58.2979 4.98353 15
 3 11 0 52.2848 4.70873 9
 -4 -11 0 39.3384 4.12677 1
 -4 -11 0 34.8812 4.42853 23
 -4 -11 0 30.8789 3.84091 13
 -4 -11 0 35.0613 4.0296 14
 -4 -11 0 27.9972 4.87589 21
 4 11 0 41.3111 5.01364 15
 4 11 0 48.8757 4.76235 9
 4 11 0 42.3387 4.65005 1
 4 11 0 43.8937 4.18651 24
 -5 -11 0 1.81042 3.05945 20
 -5 -11 0 -4.6158 2.65017 1
 -5 -11 0 -1.1177 2.84355 13
 -5 -11 0 0.42887 3.41967 23
 -5 -11 0 -0.808 3.48679 14
 5 11 0 1.13908 3.21771 24
 5 11 0 1.07541 2.1485 3
 6 -12 0 2.77488 3.23176 1
 6 -12 0 -2.6531 2.9669 14
 6 -12 0 0.74845 2.63936 1
 6 -12 0 2.16435 3.24712 20
 6 -12 0 1.49939 3.40983 23
 -6 12 0 7.21029 2.82851 1
 -6 12 0 3.03392 3.42499 12
 -6 12 0 3.46495 3.16004 1
 -6 12 0 5.01625 3.67305 13
 -6 12 0 3.99373 2.47272 17
 -6 12 0 -0.3331 3.12961 21
 5 -12 0 20.6901 3.60583 13
 5 -12 0 23.3683 3.51072 1
 5 -12 0 8.13003 3.23407 14
 5 -12 0 17.1826 2.97271 1
 5 -12 0 21.5302 4.00728 23
 -5 12 0 16.264 3.02964 17
 -5 12 0 21.5502 3.40992 1
 -5 12 0 17.6784 3.5649 13
 -5 12 0 19.0957 3.27215 1
 -5 12 0 18.1188 3.61791 21
 -5 12 0 22.4624 3.40315 12
 4 -12 0 0.72924 2.51026 1
 4 -12 0 1.31457 1.76545 20
 4 -12 0 1.43081 2.08785 1
 4 -12 0 -3.5254 2.85681 13
 4 -12 0 -2.0706 2.74901 23
 -4 12 0 4.17827 2.41841 21
 -4 12 0 6.49658 2.45539 1
 -4 12 0 -1.6874 2.3121 1
 -4 12 0 0.78308 2.73743 24
 -4 12 0 2.01134 2.23969 12
 3 -12 0 40.3868 4.75281 23
 3 -12 0 49.701 4.05964 1
 3 -12 0 31.8579 3.09736 20
 3 -12 0 38.3502 3.17345 6
 3 -12 0 42.6294 4.46404 13
 3 -12 0 48.3646 4.4529 1
 -3 12 0 39.2416 4.60676 21
 -3 12 0 47.7048 4.14599 1
 -3 12 0 43.4919 4.31136 1
 2 -12 0 33.402 2.9673 20
 2 -12 0 37.0852 3.64968 1
 2 -12 0 28.6876 3.84024 23
 2 -12 0 32.648 3.82659 1
 2 -12 0 35.8109 3.30672 6
 2 -12 0 33.7351 4.51569 13
 -2 12 0 30.0425 4.04174 1
 -2 12 0 29.9337 3.44962 21
 1 -12 0 7.90884 1.62646 3
 1 -12 0 6.51028 1.7446 20
 1 -12 0 10.2109 2.39055 1
 1 -12 0 7.04076 2.41161 1
 1 -12 0 10.8618 2.99712 23
 1 -12 0 9.31084 2.50068 13
 1 -12 0 5.21424 2.67065 21
 -1 12 0 3.40845 2.46354 1
 -1 12 0 8.40314 2.10077 24
 -1 12 0 10.7805 2.51633 2
 -1 12 0 12.7312 2.78536 21
 0 -12 0 66.5455 4.77743 13
 0 -12 0 58.6861 3.66802 20
 0 -12 0 78.6313 4.848 1
 0 -12 0 59.913 5.14388 21
 0 -12 0 71.1709 4.64475 23
 0 -12 0 57.806 3.92883 1
 0 12 0 67.8089 4.76076 21
 0 12 0 76.3166 4.99326 1
 0 12 0 67.9202 2.6624 19
 0 12 0 71.7315 4.33698 2
 0 12 0 72.5397 3.83635 24
 -1 -12 0 25.4872 3.31127 13
 -1 -12 0 26.4694 3.73729 23
 -1 -12 0 28.1017 3.08629 1
 -1 -12 0 25.1123 2.72649 12
 -1 -12 0 26.3943 3.57731 1
 -1 -12 0 23.398 2.8283 20
 -1 -12 0 21.235 3.63637 21
 1 12 0 30.5038 3.16321 1
 1 12 0 28.1777 3.37255 21
 -2 -12 0 33.4873 4.38893 13
 -2 -12 0 40.9269 4.19644 23
 -2 -12 0 42.4337 3.79653 11
 -2 -12 0 39.1774 4.12878 1
 -2 -12 0 28.7162 3.7351 1
 -2 -12 0 37.2615 4.42707 21
 -2 -12 0 32.2315 3.33999 20
 2 12 0 43.0374 4.36292 1
 2 12 0 39.784 3.8068 21
 2 12 0 37.5269 3.93878 24
 -3 -12 0 21.7588 4.69306 21
 -3 -12 0 24.2798 3.54192 13
 -3 -12 0 22.6942 3.91366 23
 -3 -12 0 26.1908 3.27485 1
 -3 -12 0 27.0738 3.56974 1
 3 12 0 23.3974 3.57845 21
 3 12 0 25.4961 3.56445 1
 3 12 0 33.9018 4.01473 15
 3 12 0 25.639 3.23969 24
 3 12 0 26.2944 3.83614 9
 -4 -12 0 2.10902 3.30351 23
 -4 -12 0 -0.8414 2.80049 1
 -4 -12 0 -5.3544 2.54526 13
 -4 -12 0 2.95687 3.7009 14
 -4 -12 0 1.6548 3.0832 20
 4 12 0 -0.3413 3.33208 15
 4 12 0 1.12639 2.77689 24
 4 12 0 -1.9813 2.18972 1
 4 12 0 1.1261 3.00139 9
 -5 -12 0 -2.0278 3.56871 13
 -5 -12 0 4.95349 4.35414 14
 -5 -12 0 1.51381 3.67657 23
 5 12 0 6.24183 3.8067 1
 6 -13 0 4.66846 3.90736 23
 6 -13 0 9.53716 3.56417 14
 6 -13 0 3.23902 2.96105 1
 6 -13 0 4.91745 3.48782 20
 6 -13 0 3.72841 3.27199 1
 -6 13 0 6.12104 3.32946 1
 -6 13 0 9.6648 3.81619 21
 -6 13 0 4.62206 4.11854 12
 -6 13 0 5.01956 3.25821 1
 -6 13 0 11.1065 3.44595 17
 5 -13 0 -4.9188 3.02317 14
 5 -13 0 -4.07 2.8721 20
 5 -13 0 5.44077 3.8379 13
 5 -13 0 -6.1702 3.38016 23
 5 -13 0 4.38818 2.93437 1
 -5 13 0 -2.4758 2.53718 1
 -5 13 0 0.42628 2.70393 1
 -5 13 0 -0.1012 3.26019 21
 -5 13 0 3.52382 3.04258 12
 4 -13 0 19.7507 3.78098 13
 4 -13 0 15.3541 4.03441 23
 4 -13 0 18.9772 3.2606 1
 4 -13 0 21.4465 3.17409 1
 -4 13 0 8.56273 3.10495 1
 -4 13 0 17.1914 3.20281 1
 -4 13 0 18.0889 2.88085 12
 -4 13 0 15.0489 3.36618 24
 -4 13 0 22.7716 3.90567 21
 3 -13 0 8.93679 2.77229 1
 3 -13 0 14.2632 2.69332 1
 3 -13 0 14.3411 3.31879 13
 3 -13 0 7.65909 3.45518 23
 3 -13 0 10.4654 2.24568 20
 3 -13 0 7.7676 2.22859 6
 -3 13 0 9.7953 3.27914 24
 -3 13 0 11.5416 2.72732 1
 -3 13 0 12.4706 2.91899 1
 -3 13 0 9.0057 3.07735 21
 2 -13 0 2.21681 2.13942 20
 2 -13 0 2.36298 2.15415 6
 2 -13 0 4.39608 2.76829 13
 2 -13 0 4.96444 2.23317 3
 2 -13 0 -0.4584 2.98632 23
 2 -13 0 4.51771 2.47956 1
 2 -13 0 4.00061 2.16195 1
 -2 13 0 0.38974 2.54424 1
 -2 13 0 7.619 2.99309 24
 -2 13 0 1.93919 2.71939 21
 1 -13 0 -2.6298 2.84067 23
 1 -13 0 -0.4576 1.6067 1
 1 -13 0 -0.1417 1.78816 20
 1 -13 0 0.28624 2.63455 13
 -1 13 0 -0.0809 2.41251 2
 -1 13 0 -5.9617 2.27863 1
 -1 13 0 3.08176 2.70687 24
 -1 13 0 2.28398 2.66876 21
 0 -13 0 -0.9014 1.38593 20
 0 -13 0 -4.5424 1.88501 1
 0 -13 0 -0.0475 2.56524 13
 0 -13 0 0.07272 2.72198 23
 0 -13 0 -0.6638 2.29113 1
 0 13 0 -2.7044 2.27996 1
 0 13 0 0.3077 1.04511 19
 0 13 0 2.77554 2.29415 2
 0 13 0 -2.5557 2.59895 21
 0 13 0 1.87425 2.69458 24
 0 13 0 -0.2774 0.83365 19
 -1 -13 0 12.9078 2.7903 1
 -1 -13 0 10.5847 3.01356 13
 -1 -13 0 7.86571 2.42169 1
 -1 -13 0 7.85474 1.97507 20
 -1 -13 0 8.52087 1.9144 12
 -1 -13 0 12.6802 3.54397 23
 1 13 0 10.7379 2.93221 24
 1 13 0 11.6077 2.79572 1
 1 13 0 7.82456 3.15026 21
 -2 -13 0 24.7327 4.15317 23
 -2 -13 0 24.9758 3.37165 1
 -2 -13 0 26.1957 3.62023 13
 -2 -13 0 29.395 3.53192 12
 -2 -13 0 20.968 3.19296 1
 -2 -13 0 22.6751 2.98685 11
 2 13 0 19.6768 3.32287 24
 2 13 0 23.36 3.59668 1
 2 13 0 20.3685 3.40381 21
 -3 -13 0 11.5703 3.72617 23
 -3 -13 0 10.4551 2.96963 1
 -3 -13 0 9.49425 3.31526 20
 -3 -13 0 8.45417 2.93858 1
 -3 -13 0 6.54359 3.08278 13
 3 13 0 7.09307 2.99618 1
 3 13 0 6.3306 3.58341 9
 3 13 0 13.7377 3.52614 21
 3 13 0 9.36543 3.94839 15
 3 13 0 9.41842 3.36564 24
 -4 -13 0 -5.7147 2.88812 1
 -4 -13 0 7.10293 4.43123 14
 -4 -13 0 -4.4797 3.11387 13
 -4 -13 0 9.93494 3.22901 1
 -4 -13 0 -0.9965 3.32527 20
 -4 -13 0 3.50341 3.55231 23
 4 13 0 7.77121 4.14404 15
 4 13 0 -1.6553 3.40291 1
 4 13 0 12.5303 3.79349 9
 4 13 0 3.98286 3.23981 24
 5 -14 0 -1.3849 2.8558 1
 5 -14 0 -8.1246 3.2147 14
 5 -14 0 -0.9131 3.09123 1
 5 -14 0 2.81015 4.30409 13
 5 -14 0 -7.4478 3.61985 23
 5 -14 0 -3.4524 3.02795 20
 -5 14 0 4.84844 2.94969 1
 -5 14 0 0.47 3.274 12
 -5 14 0 -4.8243 3.04185 1
 -5 14 0 -1.9469 3.60479 21
 4 -14 0 1.49614 3.69511 13
 4 -14 0 -4.4352 3.5094 23
 4 -14 0 8.03333 3.09588 1
 4 -14 0 12.421 2.9899 1
 4 -14 0 8.43226 3.21078 20
 -4 14 0 -0.0359 3.07902 24
 -4 14 0 8.71596 3.04595 1
 -4 14 0 9.50871 3.51072 21
 -4 14 0 4.28141 3.13559 1
 3 -14 0 1.59721 2.4238 1
 3 -14 0 -0.3178 3.5575 13
 3 -14 0 1.88817 3.32878 23
 3 -14 0 -0.4442 2.91965 20
 3 -14 0 -1.6475 2.23073 6
 3 -14 0 2.45084 2.88488 1
 -3 14 0 0.98897 3.05961 24
 -3 14 0 -4.1535 2.7496 1
 -3 14 0 1.62303 3.03576 21
 2 -14 0 2.26809 3.12716 23
 2 -14 0 2.08277 2.30271 1
 2 -14 0 3.08074 3.21364 13
 2 -14 0 1.41081 2.50464 6
 2 -14 0 0.28515 2.26038 3
 2 -14 0 3.16278 2.50834 1
 -2 14 0 2.4772 2.78468 1
 -2 14 0 0.38017 2.72091 21
 -2 14 0 0.68458 2.8884 24
 1 -14 0 16.0337 3.5807 13
 1 -14 0 15.0083 2.64854 1
 1 -14 0 12.3608 3.53253 23
 1 -14 0 19.1942 2.82145 1
 -1 14 0 16.1207 3.38745 21
 -1 14 0 20.4529 2.84525 1
 -1 14 0 15.7654 3.41286 2
 -1 14 0 16.2769 3.05058 24
 0 -14 0 -1.8232 2.51669 1
 0 -14 0 -2.1798 2.88349 13
 0 -14 0 0.07019 2.29316 1
 0 -14 0 6.12398 3.14477 23
 0 14 0 -4.5493 2.63708 1
 0 14 0 0.33688 1.33141 7
 0 14 0 1.46176 2.85756 24
 0 14 0 -0.1035 2.66833 2
 0 14 0 -1.7121 2.82715 21
 -1 -14 0 2.09814 2.75386 1
 -1 -14 0 -0.5426 2.87943 13
 -1 -14 0 0.71023 2.58795 1
 -1 -14 0 5.5815 3.54935 23
 -1 -14 0 -4.1911 2.82147 20
 1 14 0 8.76919 3.13179 24
 1 14 0 -4.4228 3.02466 21
 1 14 0 9.75506 3.00589 1
 -2 -14 0 8.11064 3.09391 11
 -2 -14 0 6.06532 2.98805 1
 -2 -14 0 6.13774 3.17048 13
 -2 -14 0 3.88953 3.15779 20
 -2 -14 0 6.15727 3.6009 23
 -2 -14 0 6.41653 2.46678 12
 -2 -14 0 5.5973 2.79672 1
 2 14 0 2.34954 3.16114 24
 2 14 0 4.73506 3.07839 1
 2 14 0 6.05612 3.43983 21
 -3 -14 0 0.71861 3.22335 13
 -3 -14 0 1.62511 3.03729 1
 -3 -14 0 5.23137 3.1645 1
 -3 -14 0 -4.1251 2.93408 12
 -3 -14 0 -3.78 2.36624 20
 -3 -14 0 7.87967 4.00702 23
 3 14 0 -2.7195 4.36791 15
 3 14 0 4.9248 3.6216 21
 3 14 0 -4.0092 3.10461 24
 3 14 0 -2.0253 4.16859 9
 3 14 0 9.25521 3.30405 1
 4 -15 0 6.1484 3.50904 20
 4 -15 0 -3.622 3.9257 23
 4 -15 0 13.8684 3.23042 1
 4 -15 0 2.48391 3.37145 1
 4 -15 0 4.32487 4.49314 13
 -4 15 0 5.69762 3.32493 1
 -4 15 0 -1.2303 3.35934 24
 -4 15 0 1.88702 3.57783 21
 -4 15 0 -2.209 3.38515 1
 3 -15 0 11.3355 3.43089 3
 3 -15 0 10.2708 2.91514 1
 3 -15 0 8.61001 3.15236 20
 3 -15 0 10.0718 4.44897 13
 3 -15 0 11.2307 3.82309 23
 3 -15 0 5.5059 3.34658 1
 3 -15 0 10.2945 2.79751 6
 -3 15 0 9.20932 3.68119 24
 -3 15 0 8.19513 3.42387 21
 -3 15 0 6.62089 3.22096 1
 2 -15 0 26.3167 4.56486 13
 2 -15 0 18.3487 4.27974 23
 2 -15 0 23.1249 3.3172 1
 2 -15 0 20.2 2.75894 3
 2 -15 0 18.5742 3.30091 6
 2 -15 0 13.8963 3.35878 20
 2 -15 0 32.2172 3.90353 1
 -2 15 0 20.4331 4.05135 2
 -2 15 0 25.6996 3.7328 1
 -2 15 0 27.0984 3.9487 21
 -2 15 0 19.3004 3.48968 24
 1 -15 0 0.00876 3.098 20
 1 -15 0 0.07954 2.55767 1
 1 -15 0 1.14265 3.18522 23
 1 -15 0 -4.525 3.40443 13
 1 -15 0 -4.2055 2.7793 1
 -1 15 0 3.93492 2.98924 1
 -1 15 0 -2.1033 3.12219 21
 -1 15 0 7.421 3.04618 24
 -1 15 0 2.35538 3.38222 2
 0 -15 0 15.7602 2.95675 1
 0 -15 0 4.67713 3.0575 20
 0 -15 0 14.5619 3.80311 23
 0 -15 0 10.008 3.11666 1
 0 -15 0 9.19056 3.58491 13
 0 15 0 5.66752 3.11673 1
 0 15 0 9.40152 3.37943 2
 0 15 0 12.3831 3.27739 24
 0 15 0 12.9601 3.49347 21
 -1 -15 0 4.11141 2.71411 1
 -1 -15 0 7.13171 3.26142 13
 -1 -15 0 9.24815 3.14326 1
 -1 -15 0 -2.2011 2.92291 20
 -1 -15 0 7.9557 3.96768 23
 1 15 0 6.04847 3.0049 1
 1 15 0 6.73581 3.36254 24
 1 15 0 1.71269 3.58663 21
 -1 16 -1 8.97161 3.70211 21
 -1 16 -1 4.88114 3.38035 24
 -1 16 -1 6.82342 3.92866 2
 -1 16 -1 15.699 3.51102 1
 1 -16 1 7.86586 4.18583 13
 1 -16 1 7.77273 3.52481 20
 1 -16 1 4.86012 2.97961 1
 1 -16 1 4.50931 3.72085 23
 1 -16 1 11.8481 3.31788 1
 -2 16 -1 7.80837 3.44437 1
 -2 16 -1 4.7218 4.20235 2
 -2 16 -1 12.1483 3.7244 21
 2 -16 1 6.12613 4.6311 13
 2 -16 1 5.52835 2.83673 3
 2 -16 1 7.83101 3.21921 1
 2 -16 1 11.5147 3.11438 1
 2 15 -1 -1.9278 3.29405 21
 2 15 -1 -0.214 2.97953 24
 2 15 -1 8.05184 2.72564 1
 -2 -15 1 -1.5887 2.83077 13
 -2 -15 1 0.23997 3.69274 11
 -2 -15 1 6.92133 3.05843 1
 -2 -15 1 -2.6428 3.04992 20
 -2 -15 1 -4.9397 2.87635 1
 -2 -15 1 2.07841 3.46649 23
 1 15 -1 14.823 3.50242 24
 1 15 -1 3.40733 3.41192 21
 1 15 -1 11.3258 3.27766 1
 -1 -15 1 8.71227 2.98513 1
 -1 -15 1 6.38587 3.1108 1
 -1 -15 1 7.2033 3.55461 23
 -1 -15 1 6.27194 3.22519 13
 -1 -15 1 6.5723 3.37839 20
 -1 -15 1 10.5453 3.80844 11
 0 15 -1 3.46259 1.75142 7
 0 15 -1 5.81325 2.9718 2
 0 15 -1 4.83695 3.32357 24
 0 15 -1 -1.428 3.03983 1
 0 15 -1 2.74279 3.28298 21
 0 -15 1 3.95161 2.33668 1
 0 -15 1 4.54762 3.01098 1
 0 -15 1 9.46131 3.44682 23
 0 -15 1 1.90694 2.77908 20
 0 -15 1 8.91999 3.07377 13
 -1 15 -1 5.80675 3.31425 2
 -1 15 -1 5.35051 3.20886 24
 -1 15 -1 9.20636 3.46813 21
 -1 15 -1 4.27612 2.64896 1
 1 -15 1 -1.4265 2.54591 1
 1 -15 1 3.86988 3.50521 13
 1 -15 1 3.84194 2.6728 1
 1 -15 1 2.65307 3.43018 23
 1 -15 1 3.85679 3.06063 20
 -2 15 -1 1.11993 3.0166 1
 -2 15 -1 13.8273 3.49097 21
 -2 15 -1 7.39474 3.50353 24
 2 -15 1 8.17277 2.79306 3
 2 -15 1 7.6857 2.88775 1
 2 -15 1 7.26268 2.5829 6
 2 -15 1 6.89321 3.25172 20
 2 -15 1 5.31275 3.74257 13
 2 -15 1 3.57858 3.52531 23
 -3 15 -1 -3.1891 3.14905 21
 -3 15 -1 2.02745 2.8901 1
 -3 15 -1 0.59673 3.16283 24
 3 -15 1 2.14095 3.17882 20
 3 -15 1 -2.7084 3.43083 23
 3 -15 1 4.76138 4.03317 13
 3 -15 1 8.17791 2.94037 1
 3 -15 1 10.3767 2.85317 1
 3 -15 1 1.08285 3.40632 3
 -4 15 -1 -5.507 3.37121 1
 -4 15 -1 0.12449 3.21395 1
 -4 15 -1 -2.9575 3.39227 24
 -4 15 -1 2.01071 3.44307 21
 4 -15 1 5.28948 3.37668 20
 4 -15 1 -0.8802 2.86473 22
 4 -15 1 -5.4693 3.53084 23
 4 -15 1 -0.6584 3.40631 1
 4 -15 1 -5.0419 3.42465 14
 4 -15 1 0.05389 4.54291 13
 4 -15 1 6.54835 3.15288 1
 3 14 -1 0.0309 4.01121 9
 3 14 -1 3.56057 3.31218 21
 3 14 -1 -0.4423 3.12299 24
 3 14 -1 6.57555 3.43112 1
 -3 -14 1 2.9901 2.58565 12
 -3 -14 1 9.16152 4.09204 23
 -3 -14 1 -1.1584 3.48979 20
 -3 -14 1 -0.3567 3.16932 1
 -3 -14 1 6.60049 3.52528 13
 -3 -14 1 9.30303 3.14176 1
 2 14 -1 -3.8978 2.68498 1
 2 14 -1 0.13071 2.97418 24
 2 14 -1 0.32013 3.15755 21
 -2 -14 1 -4.6223 2.02622 13
 -2 -14 1 -3.4047 2.91013 23
 -2 -14 1 1.82314 3.10816 11
 -2 -14 1 -0.7841 1.8416 12
 -2 -14 1 -5.1675 3.09387 20
 1 14 -1 7.57069 2.96275 1
 1 14 -1 0.44096 2.8741 24
 1 14 -1 -1.5774 3.11505 21
 -1 -14 1 -0.2513 2.13545 20
 -1 -14 1 5.43101 2.34695 1
 -1 -14 1 1.25249 2.66109 13
 -1 -14 1 3.91847 2.86355 1
 -1 -14 1 0.47464 3.16601 23
 0 14 -1 -1.6358 2.53984 1
 0 14 -1 6.97722 2.55245 2
 0 14 -1 3.00936 1.72794 7
 0 14 -1 -3.428 2.82301 21
 0 14 -1 0.13617 2.80163 24
 0 -14 1 1.60155 2.6247 13
 0 -14 1 1.87269 2.22048 1
 0 -14 1 -1.5341 2.46863 1
 0 -14 1 6.05792 2.61626 23
 -1 14 -1 16.6563 3.16639 2
 -1 14 -1 23.295 3.3261 24
 -1 14 -1 26.2735 3.5501 1
 -1 14 -1 20.7562 3.50341 21
 1 -14 1 12.0394 2.94615 1
 1 -14 1 16.2883 2.80427 1
 1 -14 1 14.2066 3.1771 13
 1 -14 1 14.7417 3.77169 23
 -2 14 -1 33.421 4.0034 21
 -2 14 -1 31.1179 3.80849 1
 -2 14 -1 30.9724 3.69728 24
 2 -14 1 26.6058 4.09533 23
 2 -14 1 32.9199 4.08671 3
 2 -14 1 26.5668 4.18581 13
 2 -14 1 33.009 3.66482 6
 2 -14 1 39.881 4.00961 1
 2 -14 1 35.8541 3.52315 1
 -3 14 -1 4.79855 3.19554 24
 -3 14 -1 7.49905 2.92486 1
 -3 14 -1 7.71517 2.74319 1
 -3 14 -1 4.03357 3.23989 21
 3 -14 1 8.4711 3.54847 13
 3 -14 1 2.00766 3.07148 23
 3 -14 1 5.67519 3.01537 20
 3 -14 1 8.03145 2.6241 1
 3 -14 1 5.19223 2.86891 1
 -4 14 -1 14.4659 3.38762 1
 -4 14 -1 10.8503 3.53205 24
 -4 14 -1 24.1341 3.49881 1
 -4 14 -1 19.4782 3.85966 21
 4 -14 1 20.5466 3.34853 1
 4 -14 1 18.9298 4.38452 13
 4 -14 1 19.0864 2.93623 20
 4 -14 1 9.82324 3.36574 14
 4 -14 1 24.8445 3.78064 1
 4 -14 1 16.9265 2.71342 22
 4 -14 1 17.3542 4.17308 23
 -5 14 -1 2.33047 3.26354 12
 -5 14 -1 11.6667 3.19915 1
 -5 14 -1 -2.1603 3.13788 21
 -5 14 -1 4.59546 3.05105 1
 5 -14 1 0.96869 3.2604 20
 5 -14 1 6.06465 3.13487 1
 5 -14 1 5.66798 3.30263 1
 5 -14 1 -4.8998 2.9244 14
 5 -14 1 3.34836 4.33731 13
 5 -14 1 -6.1468 3.64934 23
 4 13 -1 8.33599 3.55868 9
 4 13 -1 4.52102 3.44598 1
 4 13 -1 7.6447 3.29394 24
 4 13 -1 7.84236 3.85547 15
 -4 -13 1 5.89418 3.1981 13
 -4 -13 1 11.2545 3.35421 20
 -4 -13 1 11.9946 3.14262 1
 -4 -13 1 0.4064 3.1464 1
 -4 -13 1 14.4366 3.64019 23
 -4 -13 1 7.40294 3.93568 14
 3 13 -1 15.4985 3.3958 21
 3 13 -1 19.4218 3.50397 24
 3 13 -1 14.1572 3.17438 1
 -3 -13 1 17.0246 3.46028 20
 -3 -13 1 15.1176 3.15266 1
 -3 -13 1 16.5419 3.12269 1
 -3 -13 1 15.1795 3.42403 13
 -3 -13 1 16.3887 3.85419 23
 2 13 -1 20.4211 3.28872 21
 2 13 -1 17.351 3.29196 1
 2 13 -1 16.0291 3.32284 24
 -2 -13 1 21.5099 3.2025 13
 -2 -13 1 14.9519 2.84953 1
 -2 -13 1 21.8691 2.87445 12
 -2 -13 1 22.2641 3.1958 11
 -2 -13 1 13.0671 4.97487 21
 -2 -13 1 15.6276 3.17469 1
 -2 -13 1 20.0789 3.8946 23
 1 13 -1 3.7262 2.79553 21
 1 13 -1 1.98818 2.75205 24
 1 13 -1 1.72251 1.91909 2
 1 13 -1 -0.124 2.90762 19
 1 13 -1 9.92348 2.81917 1
 -1 -13 1 2.38252 4.02113 21
 -1 -13 1 0.34171 2.48603 1
 -1 -13 1 -1.1719 2.26525 13
 -1 -13 1 5.07581 2.35477 20
 -1 -13 1 7.67425 3.33712 23
 -1 -13 1 2.24933 2.39232 1
 0 13 -1 48.8203 4.12299 24
 0 13 -1 46.6873 4.41618 1
 0 13 -1 49.9067 4.14317 2
 0 13 -1 43.8698 2.09257 19
 0 13 -1 42.0134 4.54031 21
 0 13 -1 43.4661 3.03741 7
 0 -13 1 54.8898 4.91767 23
 0 -13 1 40.5046 4.01883 1
 0 -13 1 42.4159 3.74786 1
 0 -13 1 41.3997 4.64307 21
 0 -13 1 45.6548 4.56118 13
 0 -13 1 46.9603 3.74637 20
 -1 13 -1 37.545 4.53737 21
 -1 13 -1 36.3999 4.14084 1
 -1 13 -1 32.6832 3.63777 24
 1 -13 1 32.7221 3.41483 20
 1 -13 1 31.2577 3.92865 23
 1 -13 1 36.9443 3.16593 3
 1 -13 1 33.8393 3.82302 1
 1 -13 1 32.8092 3.74138 1
 1 -13 1 38.7707 4.51808 13
 -2 13 -1 4.47596 2.6104 21
 -2 13 -1 2.48627 2.92704 24
 -2 13 -1 5.51075 2.58795 1
 2 -13 1 4.9464 1.99329 6
 2 -13 1 3.69423 2.23556 20
 2 -13 1 7.14975 2.7546 23
 2 -13 1 5.3664 2.42046 3
 2 -13 1 3.05305 2.31845 1
 2 -13 1 8.26265 2.51438 1
 2 -13 1 3.08725 2.75035 13
 -3 13 -1 47.2819 4.96738 21
 -3 13 -1 43.758 4.29817 24
 -3 13 -1 50.6868 4.59573 1
 -3 13 -1 53.1954 4.43554 1
 3 -13 1 57.6186 4.32787 1
 3 -13 1 50.187 4.62554 1
 3 -13 1 41.4148 3.53189 20
 3 -13 1 42.1511 5.09149 23
 3 -13 1 59.4949 5.10897 13
 -4 13 -1 4.4034 2.73617 1
 -4 13 -1 1.09276 2.52112 21
 -4 13 -1 -2.9295 2.7643 24
 -4 13 -1 5.09197 2.34386 12
 -4 13 -1 3.75531 2.33137 1
 4 -13 1 -2.2792 2.33057 1
 4 -13 1 -0.315 3.08832 23
 4 -13 1 0.24614 2.07186 22
 4 -13 1 5.37212 2.67963 1
 4 -13 1 -2.2262 2.60114 14
 4 -13 1 1.12137 3.47595 13
 -5 13 -1 33.5903 4.24141 21
 -5 13 -1 33.5601 4.41714 1
 -5 13 -1 33.9441 3.75969 12
 -5 13 -1 37.1869 4.5838 1
 -5 13 -1 36.2934 4.49202 13
 5 -13 1 40.9363 4.83658 13
 5 -13 1 37.3684 4.69398 23
 5 -13 1 47.5902 4.90174 1
 5 -13 1 38.0387 4.94669 14
 5 -13 1 42.8627 4.64272 20
 -6 13 -1 0.20575 3.31485 1
 -6 13 -1 9.13233 4.20982 13
 -6 13 -1 9.38759 3.25349 1
 -6 13 -1 8.54817 3.48246 21
 -6 13 -1 8.71204 3.84288 12
 -6 13 -1 3.92433 3.29506 17
 6 -13 1 0.2904 3.14297 20
 6 -13 1 3.63011 3.85827 23
 6 -13 1 13.922 3.53505 14
 6 -13 1 9.43027 3.45406 1
 6 -13 1 0.134 3.02891 1
 5 12 -1 5.00113 2.56177 3
 5 12 -1 12.2338 3.61717 24
 5 12 -1 8.10946 3.60868 1
 -5 -12 1 8.93523 3.84532 23
 -5 -12 1 6.17083 3.55774 20
 -5 -12 1 8.3657 3.32192 1
 -5 -12 1 6.46576 3.91799 14
 -5 -12 1 0.64933 3.52871 13
 4 12 -1 17.7918 3.39464 1
 4 12 -1 15.0531 3.12763 24
 4 12 -1 15.8849 3.27067 9
 4 12 -1 16.178 3.4614 15
 -4 -12 1 21.0417 4.06248 23
 -4 -12 1 15.4953 3.11573 1
 -4 -12 1 17.3237 3.6367 14
 -4 -12 1 16.0168 3.24269 20
 -4 -12 1 15.9948 3.36682 13
 -4 -12 1 14.8323 5.22934 21
 3 12 -1 37.4182 4.64025 1
 3 12 -1 41.7111 4.09802 24
 3 12 -1 42.3952 4.91817 21
 -3 -12 1 35.2519 4.42872 23
 -3 -12 1 48.9574 4.40173 1
 -3 -12 1 40.6782 4.71419 13
 -3 -12 1 41.8138 3.75638 1
 -3 -12 1 40.2987 3.70879 20
 -3 -12 1 38.46 4.70074 21
 2 12 -1 1.0134 2.22583 1
 2 12 -1 -1.7611 2.4359 24
 2 12 -1 -3.5138 2.45968 21
 -2 -12 1 -1.4472 1.71624 1
 -2 -12 1 3.42593 3.27839 21
 -2 -12 1 2.94096 1.7721 20
 -2 -12 1 -2.4476 1.71444 1
 -2 -12 1 0.65416 2.96666 23
 -2 -12 1 1.1953 2.27781 11
 -2 -12 1 0.33066 2.36134 13
 1 12 -1 85.2835 5.11614 1
 1 12 -1 81.9478 5.21896 21
 1 12 -1 72.9664 3.84901 2
 -1 -12 1 75.7345 5.6673 21
 -1 -12 1 69.5177 4.92986 13
 -1 -12 1 79.0003 4.87569 1
 -1 -12 1 71.015 3.02066 12
 -1 -12 1 82.998 5.00097 1
 -1 -12 1 76.5536 4.17778 20
 -1 -12 1 82.1161 5.46898 23
 0 12 -1 32.4623 3.45971 2
 0 12 -1 34.2212 4.00463 21
 0 12 -1 27.4287 2.43368 24
 0 12 -1 33.8278 3.85803 1
 0 12 -1 28.0242 2.15766 19
 0 -12 1 30.4678 4.05117 13
 0 -12 1 24.2466 3.48596 21
 0 -12 1 27.7192 3.34466 1
 0 -12 1 26.6655 3.2776 1
 0 -12 1 24.8346 2.91313 20
 0 -12 1 28.7485 3.71142 23
 -1 12 -1 5.69846 2.46161 1
 -1 12 -1 11.6357 2.23079 24
 -1 12 -1 12.1461 2.63602 21
 1 -12 1 8.59871 1.95555 3
 1 -12 1 10.7606 2.53185 13
 1 -12 1 8.67931 2.15299 1
 1 -12 1 7.19412 2.63594 1
 1 -12 1 12.0056 2.28476 20
 1 -12 1 9.44448 3.08119 23
 -2 12 -1 38.0042 3.40773 1
 -2 12 -1 38.9864 3.24493 24
 -2 12 -1 51.023 4.52168 1
 -2 12 -1 40.6916 4.49588 21
 2 -12 1 39.7265 4.59612 23
 2 -12 1 46.4882 4.25505 1
 2 -12 1 46.4678 3.47457 1
 2 -12 1 35.6093 3.18677 20
 2 -12 1 32.356 4.14756 13
 2 -12 1 44.131 3.02293 6
 -3 12 -1 16.9846 2.96644 1
 -3 12 -1 15.1451 2.54629 1
 -3 12 -1 14.0971 3.17914 21
 3 -12 1 10.8179 2.3538 20
 3 -12 1 11.6183 2.44682 1
 3 -12 1 16.5401 3.54227 23
 3 -12 1 17.1766 3.10032 13
 3 -12 1 14.2783 2.8691 1
 -4 12 -1 10.4784 2.63252 1
 -4 12 -1 5.35564 2.37567 1
 -4 12 -1 7.78924 2.9952 21
 -4 12 -1 7.59955 2.27997 12
 -4 12 -1 8.57763 3.2205 13
 4 -12 1 10.005 3.03365 13
 4 -12 1 7.89927 2.81125 14
 4 -12 1 7.55095 3.44317 23
 4 -12 1 3.2768 2.70915 1
 4 -12 1 7.82931 1.82382 22
 4 -12 1 6.78434 2.18963 20
 4 -12 1 4.40574 2.38761 1
 -5 12 -1 14.8469 3.45329 21
 -5 12 -1 10.7319 3.26305 13
 -5 12 -1 12.4709 2.92614 1
 -5 12 -1 11.8662 2.93978 12
 5 -12 1 7.66508 3.75138 23
 5 -12 1 16.0047 3.25486 14
 5 -12 1 16.0457 3.45746 13
 5 -12 1 16.4895 3.18978 1
 -6 12 -1 9.11752 2.87857 1
 -6 12 -1 1.31328 2.75422 1
 -6 12 -1 4.36736 3.39104 12
 -6 12 -1 4.75515 3.59663 13
 -6 12 -1 3.95955 2.65175 17
 -6 12 -1 2.61177 3.41613 21
 6 -12 1 12.5571 3.28398 14
 6 -12 1 4.58367 3.56293 23
 6 -12 1 6.56215 2.60848 1
 6 -12 1 8.22964 2.88017 1
 6 -12 1 3.69203 3.14416 20
 5 11 -1 8.26161 3.32187 24
 5 11 -1 4.84417 2.55835 3
 5 11 -1 5.41641 3.27116 1
 -5 -11 1 4.75288 3.41442 13
 -5 -11 1 3.29286 3.40718 23
 -5 -11 1 4.11494 5.02892 21
 -5 -11 1 6.39042 3.44291 14
 -5 -11 1 1.52999 3.08832 20
 -5 -11 1 3.64467 2.97515 1
 4 11 -1 54.6374 5.01392 1
 4 11 -1 55.0218 4.82898 15
 4 11 -1 60.4403 4.64046 9
 4 11 -1 49.242 4.30904 24
 4 11 -1 48.0144 3.34346 3
 -4 -11 1 49.4221 3.85526 1
 -4 -11 1 60.9431 5.47927 23
 -4 -11 1 43.2174 4.67851 13
 -4 -11 1 54.7508 6.73541 21
 -4 -11 1 68.4738 5.4652 14
 3 11 -1 1.03673 2.46297 21
 3 11 -1 -1.8206 2.266 1
 3 11 -1 0.80193 2.6128 24
 -3 -11 1 0.79846 1.96937 20
 -3 -11 1 1.12552 1.85155 1
 -3 -11 1 1.26436 2.70831 23
 -3 -11 1 -3.3325 2.25984 13
 -3 -11 1 0.01592 3.06325 21
 2 11 -1 26.293 3.37916 1
 2 11 -1 26.4063 2.97717 21
 2 11 -1 22.8213 2.64006 24
 -2 -11 1 24.6202 3.23742 1
 -2 -11 1 25.3617 3.34373 13
 -2 -11 1 26.0527 3.31092 21
 -2 -11 1 27.6784 3.53516 23
 -2 -11 1 24.2087 3.17679 1
 -2 -11 1 32.6757 3.37231 11
 -2 -11 1 23.1564 2.82731 20
 1 11 -1 73.1058 4.75506 1
 1 11 -1 76.0947 3.47157 2
 1 11 -1 75.8527 4.43708 21
 1 11 -1 71.5426 3.4583 24
 -1 -11 1 68.7973 4.52357 1
 -1 -11 1 71.0092 2.84834 12
 -1 -11 1 70.8765 4.98756 23
 -1 -11 1 69.5211 4.25964 13
 -1 -11 1 65.9835 4.76011 21
 -1 -11 1 68.3327 3.8189 20
 -1 -11 1 68.6306 4.45494 1
 0 11 -1 -0.4879 1.7553 2
 0 11 -1 3.32506 2.35079 1
 0 11 -1 -0.084 1.80855 24
 0 11 -1 -0.0077 1.30275 19
 0 11 -1 -0.178 2.04751 21
 0 -11 1 -3.4595 2.19941 21
 0 -11 1 1.05786 1.85418 20
 0 -11 1 0.74923 2.6529 23
 0 -11 1 0.0115 1.98856 1
 0 -11 1 0.68784 1.9978 13
 0 -11 1 -0.5852 2.14141 1
 -1 11 -1 108.948 4.51869 24
 -1 11 -1 95.7572 5.35264 1
 -1 11 -1 108.887 3.45547 7
 -1 11 -1 112.948 5.29795 21
 1 -11 1 118.793 4.44593 3
 1 -11 1 109.719 4.56803 20
 1 -11 1 115.68 5.41641 1
 1 -11 1 106.14 5.45782 1
 1 -11 1 116.007 5.773 23
 1 -11 1 113.875 5.50493 13
 -2 11 -1 27.1677 3.27455 1
 -2 11 -1 29.527 3.19295 21
 -2 11 -1 28.7466 2.87281 24
 -2 11 -1 30.279 3.97967 1
 2 -11 1 28.1012 3.6707 1
 2 -11 1 30.637 2.50367 6
 2 -11 1 33.0679 4.14058 23
 2 -11 1 29.7159 3.23876 13
 2 -11 1 26.3958 3.55719 1
 2 -11 1 25.235 2.67562 20
 -3 11 -1 -1.3225 1.86675 24
 -3 11 -1 1.97642 2.42784 21
 -3 11 -1 2.80116 2.32865 1
 -3 11 -1 -0.9722 1.50958 12
 -3 11 -1 -0.9206 2.19504 1
 -3 11 -1 -0.0645 2.24488 13
 3 -11 1 0.31251 2.76403 23
 3 -11 1 1.67663 2.10636 1
 3 -11 1 -1.3719 1.69107 20
 3 -11 1 2.31672 2.3076 1
 3 -11 1 -0.2271 2.20907 13
 -4 11 -1 64.6296 5.04504 21
 -4 11 -1 64.9971 4.01625 12
 -4 11 -1 66.7495 4.65972 1
 -4 11 -1 72.0728 5.08394 13
 -4 11 -1 61.7793 4.70188 1
 4 -11 1 64.846 2.9108 22
 4 -11 1 65.2998 4.71683 14
 4 -11 1 60.8279 4.73147 1
 4 -11 1 65.9885 5.09845 13
 4 -11 1 61.7552 4.44643 1
 4 -11 1 58.8611 4.49009 23
 4 -11 1 60.2755 3.8211 20
 -5 11 -1 22.4833 3.16195 1
 -5 11 -1 18.9565 3.04358 1
 -5 11 -1 18.5553 2.89559 12
 -5 11 -1 22.37 3.602 21
 -5 11 -1 21.5219 3.36715 13
 5 -11 1 22.5026 3.30788 14
 5 -11 1 27.5381 3.54775 1
 5 -11 1 21.5653 2.77422 20
 5 -11 1 23.9095 3.2421 1
 5 -11 1 20.3216 3.6709 23
 5 -11 1 22.5337 3.35235 13
 -6 11 -1 -0.0483 3.10166 13
 -6 11 -1 1.79466 1.9709 17
 -6 11 -1 2.56504 3.21823 21
 -6 11 -1 1.01928 2.47182 1
 -6 11 -1 -2.7843 2.54578 1
 6 -11 1 -1.8084 2.51755 1
 6 -11 1 0.45138 2.63974 4
 6 -11 1 -0.5599 1.78775 19
 6 -11 1 6.60345 2.70164 14
 6 -11 1 8.31733 2.50589 1
 6 -11 1 0.88771 2.42797 7
 6 -11 1 2.92548 2.9837 23
 -7 11 -1 14.7112 4.26557 13
 -7 11 -1 21.0988 3.71418 1
 -7 11 -1 16.4563 3.99155 21
 -7 11 -1 16.6249 3.2826 1
 7 -11 1 17.6746 3.7692 20
 7 -11 1 15.7679 2.90305 4
 7 -11 1 21.2278 3.53495 1
 7 -11 1 15.6307 3.72621 14
 7 -11 1 18.5121 4.12519 23
 7 -11 1 17.4098 3.62347 7
 6 10 -1 -0.0917 3.06544 24
 6 10 -1 3.25589 3.19783 1
 -6 -10 1 2.37303 5.54781 21
 -6 -10 1 0.81945 3.16932 20
 -6 -10 1 -1.5102 3.35678 14
 -6 -10 1 -2.7385 3.33095 13
 -6 -10 1 -5.2418 3.97105 8
 5 10 -1 17.2835 3.21827 24
 5 10 -1 31.5915 4.17028 1
 -5 -10 1 22.7617 3.34557 14
 -5 -10 1 19.7121 3.54875 13
 -5 -10 1 20.2417 3.87667 23
 -5 -10 1 20.7807 3.29407 1
 -5 -10 1 20.9001 4.21202 21
 4 10 -1 30.9228 3.58861 9
 4 10 -1 30.8237 3.4822 24
 4 10 -1 30.348 3.92695 15
 4 10 -1 30.8992 3.13717 3
 4 10 -1 30.7291 4.17065 1
 -4 -10 1 33.5661 3.79329 1
 -4 -10 1 36.3519 4.09879 14
 -4 -10 1 37.2379 4.65733 23
 -4 -10 1 35.6285 3.36058 20
 -4 -10 1 31.314 3.80934 21
 -4 -10 1 27.6842 3.57027 13
 3 10 -1 54.1746 2.90082 3
 3 10 -1 58.893 3.47306 24
 3 10 -1 56.7468 4.0357 21
 3 10 -1 50.5928 3.88003 1
 -3 -10 1 65.7017 4.66735 21
 -3 -10 1 62.2041 4.38064 1
 -3 -10 1 57.2328 3.64935 20
 -3 -10 1 63.1939 4.74332 23
 -3 -10 1 57.4522 3.95324 13
 2 10 -1 83.9501 3.81872 24
 2 10 -1 74.765 4.75287 1
 2 10 -1 79.8904 4.37989 21
 -2 -10 1 80.6911 5.00091 23
 -2 -10 1 87.6589 4.06336 20
 -2 -10 1 76.5056 4.58028 1
 -2 -10 1 87.9774 3.9272 11
 -2 -10 1 78.134 4.6986 1
 -2 -10 1 82.8514 4.55082 21
 -2 -10 1 73.2799 4.88548 13
 1 10 -1 -0.1863 1.64811 1
 1 10 -1 -1.4255 1.88427 21
 1 10 -1 0.80561 1.672 24
 1 10 -1 0.22323 1.31716 2
 -1 -10 1 -0.0823 1.58313 13
 -1 -10 1 -1.1383 1.52123 1
 -1 -10 1 -0.4912 1.89486 1
 -1 -10 1 0.27754 1.08017 12
 -1 -10 1 -3.0086 1.52621 20
 -1 -10 1 -0.9799 1.93466 21
 -1 -10 1 1.10868 2.443 23
 0 10 -1 130.336 4.82193 24
 0 10 -1 136.836 5.91382 1
 0 10 -1 129.816 3.91495 19
 0 10 -1 138.778 5.53609 21
 0 -10 1 136.294 5.74511 1
 0 -10 1 132.888 5.68928 13
 0 -10 1 129.793 4.94849 20
 0 -10 1 131.517 5.43921 21
 0 -10 1 132.497 5.87297 23
 0 -10 1 129.299 5.81371 1
 -1 10 -1 136.109 4.09189 7
 -1 10 -1 138.561 4.98497 24
 -1 10 -1 129.647 5.11097 23
 -1 10 -1 138.679 5.94405 1
 -1 10 -1 141.076 5.64226 21
 1 -10 1 143.943 5.88339 1
 1 -10 1 144.28 5.77278 13
 1 -10 1 139.433 5.4924 21
 1 -10 1 132.553 5.04295 20
 1 -10 1 143.337 4.94412 3
 1 -10 1 139.884 6.05435 23
 1 -10 1 141.192 6.01999 1
 -2 10 -1 7.3364 1.71631 23
 -2 10 -1 7.9699 1.98426 24
 -2 10 -1 8.73499 2.43852 1
 -2 10 -1 9.41695 2.39599 21
 -2 10 -1 10.0239 2.49425 1
 -2 10 -1 10.7711 2.27031 13
 2 -10 1 9.84291 1.45177 6
 2 -10 1 8.53417 2.27477 23
 2 -10 1 8.22223 2.35489 1
 2 -10 1 12.2508 2.09103 20
 2 -10 1 9.58913 2.23168 13
 2 -10 1 9.04643 2.31805 1
 -3 10 -1 175.018 6.01546 24
 -3 10 -1 173.016 7.01294 1
 -3 10 -1 182.631 5.68998 12
 -3 10 -1 171.909 6.88011 1
 -3 10 -1 179.885 6.76201 13
 -3 10 -1 178.701 6.57308 21
 3 -10 1 174.601 6.09449 20
 3 -10 1 183.523 7.05814 1
 3 -10 1 180.656 6.57973 13
 3 -10 1 178.922 6.87244 1
 3 -10 1 176.901 7.11315 23
 -4 10 -1 22.9157 2.08891 10
 -4 10 -1 21.6464 2.86595 13
 -4 10 -1 22.4252 3.1448 1
 -4 10 -1 23.8111 3.04794 12
 -4 10 -1 27.0358 3.43394 1
 -4 10 -1 20.8142 3.11732 21
 4 -10 1 23.9212 3.40898 23
 4 -10 1 19.4106 2.82182 13
 4 -10 1 19.8213 2.48211 20
 4 -10 1 19.8948 1.90374 22
 4 -10 1 20.7689 3.10956 1
 4 -10 1 20.2617 2.71552 1
 4 -10 1 18.288 3.02515 14
 -5 10 -1 -2.2876 2.2404 13
 -5 10 -1 4.62573 2.3578 1
 -5 10 -1 0.18458 2.12369 1
 -5 10 -1 3.41538 1.89282 17
 -5 10 -1 2.65055 2.68972 21
 5 -10 1 0.42351 2.20872 1
 5 -10 1 1.38332 2.59341 14
 5 -10 1 4.68407 1.86959 7
 5 -10 1 1.91516 2.04139 20
 5 -10 1 3.03676 1.32686 19
 5 -10 1 7.00305 2.33262 1
 5 -10 1 3.84487 2.56233 13
 5 -10 1 3.18904 2.80654 23
 -6 10 -1 23.0984 1.94224 17
 -6 10 -1 27.8643 3.73247 21
 -6 10 -1 20.9341 3.4347 13
 -6 10 -1 22.0144 3.19038 1
 -6 10 -1 22.0972 3.21386 1
 6 -10 1 33.8715 3.66888 1
 6 -10 1 22.6355 3.70264 23
 6 -10 1 18.5482 3.2152 1
 6 -10 1 21.3862 2.8669 20
 6 -10 1 21.6287 2.94168 7
 6 -10 1 26.1814 3.73864 4
 6 -10 1 25.2725 3.27212 14
 -7 10 -1 0.53986 2.84367 1
 -7 10 -1 5.61481 3.3465 13
 -7 10 -1 4.14061 3.32523 21
 7 -10 1 -0.3004 3.18734 7
 7 -10 1 -7.1895 3.18008 23
 7 -10 1 3.29982 3.03115 20
 7 -10 1 -0.5389 2.88857 1
 7 -10 1 2.97783 2.89162 14
 7 -10 1 4.13285 2.65248 1
 6 9 -1 5.55252 3.06182 24
 6 9 -1 15.5201 3.01997 1
 -6 -9 1 7.94137 3.31573 20
 -6 -9 1 13.2838 3.22305 14
 -6 -9 1 12.0443 4.51139 21
 -6 -9 1 3.03336 2.90317 1
 -6 -9 1 8.53926 3.70565 8
 -6 -9 1 2.73919 3.62084 13
 5 9 -1 2.21759 2.48768 1
 5 9 -1 -0.7515 2.60257 24
 -5 -9 1 -1.4697 2.42726 1
 -5 -9 1 2.34771 2.49909 14
 -5 -9 1 2.14019 3.41315 21
 -5 -9 1 5.04329 2.77566 13
 -5 -9 1 3.39009 2.02328 20
 4 9 -1 9.47325 2.68323 1
 4 9 -1 6.68373 2.15348 24
 4 9 -1 6.74241 1.97228 15
 4 9 -1 8.51923 1.85004 9
 -4 -9 1 6.1685 1.71976 20
 -4 -9 1 6.7359 2.62176 13
 -4 -9 1 3.76303 2.08763 1
 -4 -9 1 6.95323 2.70891 21
 -4 -9 1 4.39885 2.01471 14
 3 9 -1 65.6976 3.41404 24
 3 9 -1 64.0261 4.06149 21
 3 9 -1 60.6316 2.9892 3
 3 9 -1 54.1067 4.25481 1
 -3 -9 1 67.3034 4.41956 1
 -3 -9 1 60.6215 3.48987 20
 -3 -9 1 62.9529 4.48577 13
 -3 -9 1 60.6277 4.5262 23
 -3 -9 1 61.167 4.05697 21
 2 9 -1 0.68734 2.08501 1
 2 9 -1 -3.1636 1.64569 21
 2 9 -1 2.55546 1.60646 24
 -2 -9 1 0.82265 1.5897 20
 -2 -9 1 0.03355 1.86009 21
 -2 -9 1 1.13297 1.4633 11
 -2 -9 1 -2.7859 1.72648 1
 -2 -9 1 0.17611 2.17625 23
 -2 -9 1 0.89299 2.0573 13
 1 9 -1 87.7468 4.31542 21
 1 9 -1 89.2598 4.71677 1
 1 9 -1 80.1498 3.60279 24
 1 9 -1 86.0914 3.32969 2
 -1 -9 1 89.4568 4.60194 13
 -1 -9 1 91.9242 3.82681 20
 -1 -9 1 88.7086 4.56931 1
 -1 -9 1 80.0769 4.41773 1
 -1 -9 1 93.7035 4.40309 23
 -1 -9 1 90.9556 4.21865 21
 0 9 -1 156.847 5.55858 21
 0 9 -1 146.349 5.0614 24
 0 9 -1 150.956 4.30555 19
 0 9 -1 155.959 5.47991 23
 0 9 -1 152.636 6.04795 1
 0 -9 1 151.126 5.44591 21
 0 -9 1 155.863 5.90527 13
 0 -9 1 155.441 5.95542 1
 0 -9 1 153.033 5.76834 23
 0 -9 1 147.253 4.69654 3
 0 -9 1 154.238 5.98502 1
 0 -9 1 155.72 5.23009 20
 -1 9 -1 18.8001 2.58652 1
 -1 9 -1 22.9117 2.46975 21
 -1 9 -1 22.8418 2.2566 24
 -1 9 -1 22.5315 1.67105 7
 -1 9 -1 24.3788 2.58863 1
 -1 9 -1 22.8861 2.21213 23
 1 -9 1 26.6466 2.35679 3
 1 -9 1 25.8851 2.53292 21
 1 -9 1 24.2767 1.99279 20
 1 -9 1 22.9259 2.88628 13
 1 -9 1 25.1948 2.50931 1
 1 -9 1 21.5883 2.73757 1
 1 -9 1 22.4349 2.78309 23
 -2 9 -1 154.469 5.15404 24
 -2 9 -1 156.61 5.9343 13
 -2 9 -1 155.777 5.44245 23
 -2 9 -1 157.63 4.73865 12
 -2 9 -1 155.086 6.11232 1
 -2 9 -1 161.207 6.1014 1
 -2 9 -1 156.832 5.88997 21
 2 -9 1 161.119 6.1226 1
 2 -9 1 159.183 5.83134 13
 2 -9 1 156.309 5.2908 20
 2 -9 1 158.062 6.21149 23
 2 -9 1 154.139 4.62511 6
 2 -9 1 159.625 6.12163 1
 -3 9 -1 5.29723 2.06643 1
 -3 9 -1 6.81355 2.02761 13
 -3 9 -1 8.27613 2.22278 21
 -3 9 -1 8.80743 1.49223 23
 -3 9 -1 7.79287 2.27169 1
 -3 9 -1 8.21549 1.64195 12
 -3 9 -1 6.08238 1.79951 24
 3 -9 1 7.21997 2.00895 13
 3 -9 1 7.12398 1.87297 20
 3 -9 1 7.22256 2.34232 1
 3 -9 1 5.2158 2.01741 1
 3 -9 1 3.70556 2.29574 23
 -4 9 -1 69.798 2.74686 10
 -4 9 -1 80.8942 4.66036 1
 -4 9 -1 77.3254 4.6325 1
 -4 9 -1 76.9243 4.45166 13
 -4 9 -1 71.8541 4.68689 21
 4 -9 1 72.8292 2.48245 22
 4 -9 1 73.6919 3.26482 7
 4 -9 1 78.5562 4.4542 1
 4 -9 1 76.1575 4.9121 23
 4 -9 1 74.5355 4.20115 14
 4 -9 1 75.0857 4.17792 13
 4 -9 1 76.8281 4.62401 1
 4 -9 1 72.3994 3.71521 20
 4 -9 1 72.3102 2.48011 19
 -5 9 -1 -0.3396 2.14638 13
 -5 9 -1 1.50141 2.43312 21
 -5 9 -1 2.79459 2.15483 1
 -5 9 -1 -0.0715 1.51806 17
 -5 9 -1 -0.0023 1.73327 1
 5 -9 1 -1.4778 1.84897 20
 5 -9 1 -1.8125 1.76789 1
 5 -9 1 1.46103 1.81305 7
 5 -9 1 1.6039 2.24324 14
 5 -9 1 0.71368 2.72017 23
 5 -9 1 0.29704 1.67639 1
 -6 9 -1 25.9585 3.30193 1
 -6 9 -1 23.1139 3.23355 13
 -6 9 -1 29.5136 3.60843 21
 -6 9 -1 25.568 3.16519 1
 6 -9 1 31.5617 3.37889 1
 6 -9 1 31.0028 3.18095 20
 6 -9 1 23.1134 3.11304 1
 6 -9 1 26.2633 3.39651 14
 6 -9 1 25.4707 3.74348 23
 6 -9 1 26.8639 3.25424 4
 -7 9 -1 -0.0847 1.92442 1
 -7 9 -1 4.1705 2.70623 1
 -7 9 -1 1.92665 3.33352 21
 -7 9 -1 -3.4265 3.03497 13
 7 -9 1 -1.1308 2.5652 20
 7 -9 1 -1.5211 2.15247 1
 7 -9 1 0.80761 3.03836 23
 7 -9 1 1.03038 2.77043 14
 7 -9 1 -0.2229 2.51395 1
 -8 9 -1 1.3967 3.73394 21
 -8 9 -1 4.82663 3.3706 1
 -8 9 -1 0.63017 2.98839 1
 -8 9 -1 -1.6101 3.71149 13
 -8 9 -1 -0.2419 1.3502 5
 -8 9 -1 1.07775 3.17022 6
 8 -9 1 0.43139 3.15662 1
 8 -9 1 -1.2883 3.13825 23
 8 -9 1 0.1062 3.14568 20
 8 -9 1 -0.0878 3.10976 1
 8 -9 1 3.2497 3.53772 14
 7 8 -1 10.7858 2.96916 1
 7 8 -1 6.54534 3.23212 1
 7 8 -1 9.36054 3.05597 24
 -7 -8 1 8.2191 5.41424 21
 -7 -8 1 8.07303 3.31544 20
 -7 -8 1 5.31549 3.06308 1
 -7 -8 1 9.80962 3.6616 8
 -7 -8 1 6.75049 1.6482 2
 -7 -8 1 5.74948 3.53234 14
 6 8 -1 9.20083 2.82466 1
 6 8 -1 7.34342 3.02013 24
 -6 -8 1 0.10093 2.32187 1
 -6 -8 1 3.27701 2.87035 8
 -6 -8 1 2.98387 2.7054 14
 -6 -8 1 4.33669 3.81031 21
 5 8 -1 11.8385 2.8377 1
 -5 -8 1 0.96516 2.25997 1
 -5 -8 1 8.19506 2.33329 14
 -5 -8 1 8.01183 2.9097 21
 -5 -8 1 4.69811 2.08953 20
 -5 -8 1 6.85708 2.81399 8
 4 8 -1 31.1826 3.88578 1
 4 8 -1 33.4287 2.63171 9
 4 8 -1 32.5041 2.72822 15
 4 8 -1 28.5376 2.7543 24
 -4 -8 1 31.1551 3.97871 13
 -4 -8 1 26.6835 3.10481 1
 -4 -8 1 28.6082 2.81538 20
 -4 -8 1 34.3533 3.81355 21
 -4 -8 1 34.8275 3.34361 14
 3 8 -1 0.51657 1.93544 1
 3 8 -1 3.37935 1.54319 24
 3 8 -1 0.18787 1.61242 21
 -3 -8 1 0.68069 1.73733 1
 -3 -8 1 2.4897 2.20145 13
 -3 -8 1 0.23232 1.50169 20
 -3 -8 1 1.7221 1.74353 21
 -3 -8 1 1.28382 2.30137 23
 2 8 -1 4.13965 1.60258 24
 2 8 -1 5.46436 2.09485 1
 2 8 -1 2.85894 1.59017 21
 2 8 -1 4.51922 1.18029 3
 -2 -8 1 0.12533 1.87757 23
 -2 -8 1 3.05888 1.57566 1
 -2 -8 1 5.07959 1.33217 20
 -2 -8 1 5.31323 1.41709 11
 -2 -8 1 4.87831 2.10809 13
 -2 -8 1 4.62663 1.73137 21
 1 8 -1 18.5478 2.51959 1
 1 8 -1 23.0977 2.09157 24
 1 8 -1 24.2559 1.84434 2
 1 8 -1 19.4442 2.11716 21
 -1 -8 1 21.1369 2.62519 23
 -1 -8 1 20.6922 2.50481 13
 -1 -8 1 22.5058 2.09174 20
 -1 -8 1 19.1933 2.29318 1
 -1 -8 1 22.0324 2.90135 1
 -1 -8 1 20.6706 2.40616 21
 0 8 -1 24.4374 2.66138 21
 0 8 -1 32.5222 2.23349 24
 0 8 -1 30.5764 2.60206 1
 0 8 -1 25.9135 2.30948 23
 0 -8 1 30.2392 2.91651 1
 0 -8 1 27.7062 2.25559 20
 0 -8 1 28.5362 1.9519 3
 0 -8 1 28.3853 2.65443 21
 0 -8 1 29.0275 3.0915 23
 0 -8 1 26.1959 2.90544 13
 0 -8 1 31.4871 2.54408 1
 -1 8 -1 66.5678 3.85114 1
 -1 8 -1 69.2703 3.63381 21
 -1 8 -1 63.7499 3.76479 1
 -1 8 -1 69.0049 3.06527 24
 -1 8 -1 68.0678 2.46143 7
 -1 8 -1 75.5279 3.31097 23
 -1 8 -1 68.6668 3.7298 13
 1 -8 1 59.019 3.78941 23
 1 -8 1 66.4127 3.09248 20
 1 -8 1 73.6263 3.82869 1
 1 -8 1 70.2672 3.89656 1
 1 -8 1 65.9986 3.6066 13
 1 -8 1 69.7016 3.5087 21
 -2 8 -1 31.3254 3.15413 1
 -2 8 -1 30.3882 2.86878 13
 -2 8 -1 33.5401 2.33557 24
 -2 8 -1 27.4414 3.01955 1
 -2 8 -1 32.2209 2.3081 23
 -2 8 -1 27.7717 3.0322 21
 -2 8 -1 31.6567 1.99014 12
 2 -8 1 31.856 1.76461 6
 2 -8 1 31.8404 2.37593 20
 2 -8 1 33.1788 3.09708 1
 2 -8 1 30.3469 2.96496 13
 2 -8 1 28.3639 2.93827 1
 2 -8 1 31.7058 2.75952 23
 -3 8 -1 24.2229 2.61843 21
 -3 8 -1 21.6466 2.19288 23
 -3 8 -1 25.0079 3.09388 1
 -3 8 -1 25.2215 3.00395 1
 -3 8 -1 24.9206 2.33894 24
 -3 8 -1 22.9656 2.41319 13
 3 -8 1 22.6714 2.66606 13
 3 -8 1 21.4393 2.59569 1
 3 -8 1 25.9241 1.88172 7
 3 -8 1 24.544 2.84844 1
 3 -8 1 27.3195 2.06454 20
 3 -8 1 27.4979 1.1021 19
 3 -8 1 24.3631 3.17962 23
 -4 8 -1 56.6466 2.28818 10
 -4 8 -1 68.4366 4.11972 1
 -4 8 -1 67.4249 4.05815 1
 -4 8 -1 63.4389 3.30206 23
 -4 8 -1 60.2276 4.18108 21
 -4 8 -1 64.3791 3.81669 13
 4 -8 1 62.8878 4.06209 1
 4 -8 1 67.9531 3.65384 13
 4 -8 1 61.6419 4.26475 23
 4 -8 1 67.3482 4.08525 1
 4 -8 1 57.8503 3.34687 20
 4 -8 1 62.7437 2.04185 22
 4 -8 1 69.6069 4.28312 14
 4 -8 1 65.4175 3.12329 7
 -5 8 -1 20.1868 2.97083 21
 -5 8 -1 13.2041 2.29777 13
 -5 8 -1 16.3574 2.80772 1
 -5 8 -1 19.1335 2.93325 1
 -5 8 -1 19.0097 1.86891 17
 5 -8 1 22.2176 2.84752 14
 5 -8 1 16.3726 2.76534 1
 5 -8 1 16.8432 2.33112 20
 5 -8 1 20.4586 3.10501 23
 5 -8 1 17.1181 2.80341 1
 -6 8 -1 1.22937 2.53947 21
 -6 8 -1 -1.8995 1.74047 6
 -6 8 -1 -0.8873 2.27198 1
 -6 8 -1 -2.4633 2.25014 13
 -6 8 -1 -2.398 1.81699 1
 6 -8 1 -0.6024 2.71887 23
 6 -8 1 -0.5004 1.41284 20
 6 -8 1 -3.2056 2.16285 14
 6 -8 1 -0.5988 1.53171 4
 6 -8 1 1.18663 2.01582 1
 6 -8 1 -2.1563 2.22218 1
 -7 8 -1 6.18855 2.67894 1
 -7 8 -1 2.32343 3.24725 21
 -7 8 -1 4.85037 2.42598 1
 -7 8 -1 7.95815 2.51033 6
 -7 8 -1 5.62881 2.82651 13
 7 -8 1 4.43045 3.09838 23
 7 -8 1 9.26234 2.31046 1
 7 -8 1 11.4387 2.92528 14
 7 -8 1 9.57415 2.52667 1
 -8 8 -1 -3.9471 3.60397 21
 -8 8 -1 -5.7039 2.71071 1
 -8 8 -1 -2.3618 3.33325 13
 -8 8 -1 -1.3445 2.56222 1
 -8 8 -1 0.66103 3.07452 6
 8 -8 1 5.13972 2.8218 1
 8 -8 1 -4.893 3.34218 14
 8 -8 1 -2.0097 3.28102 23
 8 -8 1 3.34212 2.77259 1
 7 7 -1 4.23626 2.74426 24
 7 7 -1 10.0247 2.96325 1
 7 7 -1 -1.1103 2.64048 1
 -7 -7 1 1.3055 2.81544 1
 -7 -7 1 3.34052 4.54414 21
 -7 -7 1 0.36933 3.00826 14
 -7 -7 1 3.9094 3.14118 20
 -7 -7 1 4.65714 3.04128 8
 6 7 -1 -2.8944 2.55003 24
 6 7 -1 2.45533 2.5581 1
 6 7 -1 -2.5515 2.02991 1
 -6 -7 1 -0.2528 2.48869 8
 -6 -7 1 -3.3182 3.18656 21
 -6 -7 1 3.79376 2.02084 20
 -6 -7 1 -1.6843 2.22937 14
 -6 -7 1 -3.3463 2.26408 1
 5 7 -1 19.0581 2.99401 1
 5 7 -1 16.6677 2.39728 24
 -5 -7 1 21.9933 2.85685 21
 -5 -7 1 21.4723 2.52602 14
 -5 -7 1 18.5163 2.77117 8
 -5 -7 1 18.4156 2.47096 20
 -5 -7 1 16.3429 2.84085 1
 -5 -7 1 19.659 1.83927 2
 4 7 -1 26.3286 3.46624 1
 4 7 -1 30.9539 2.27523 15
 4 7 -1 27.7535 2.18628 24
 4 7 -1 27.7134 2.09602 9
 -4 -7 1 28.471 3.19547 21
 -4 -7 1 29.7227 2.82165 14
 -4 -7 1 30.3271 2.57141 20
 -4 -7 1 30.9167 2.91621 23
 -4 -7 1 23.7434 2.86157 1
 3 7 -1 56.6752 2.91517 24
 3 7 -1 63.5301 3.30012 21
 3 7 -1 57.0217 3.80166 1
 -3 -7 1 58.6248 3.46707 13
 -3 -7 1 56.2773 3.32854 1
 -3 -7 1 57.2861 2.70379 20
 -3 -7 1 57.5941 3.12218 21
 2 7 -1 42.2703 3.30437 1
 2 7 -1 40.9637 2.41778 24
 2 7 -1 43.4464 2.21895 3
 2 7 -1 41.4048 2.66417 21
 -2 -7 1 46.6906 2.56596 20
 -2 -7 1 43.3169 2.92762 13
 -2 -7 1 43.5702 3.25378 1
 -2 -7 1 48.3699 3.39289 23
 -2 -7 1 46.3406 2.47261 11
 -2 -7 1 46.0521 2.85865 21
 1 7 -1 -2.0155 1.53906 1
 1 7 -1 -1.2046 1.19476 24
 1 7 -1 -0.5141 0.81482 2
 -1 -7 1 -0.1538 1.51692 1
 -1 -7 1 -2.0745 1.1894 21
 -1 -7 1 0.27542 1.37893 23
 -1 -7 1 -0.4045 1.23545 1
 -1 -7 1 -1.7485 0.84709 20
 -1 -7 1 0.21356 1.67345 13
 0 7 -1 10.1883 1.55982 24
 0 7 -1 8.11361 1.67805 21
 0 7 -1 7.61359 1.96331 1
 0 7 -1 10.5293 1.64287 23
 0 -7 1 8.21528 1.57068 21
 0 -7 1 7.22587 1.83475 1
 0 -7 1 9.40015 1.06977 12
 0 -7 1 10.2346 1.92678 1
 0 -7 1 10.0905 1.26709 3
 0 -7 1 8.63841 1.87277 13
 0 -7 1 9.19554 2.04871 23
 0 -7 1 10.8675 1.53309 20
 -1 7 -1 341.233 9.9932 1
 -1 7 -1 351.112 9.77297 13
 -1 7 -1 349.723 9.69938 23
 -1 7 -1 353.333 10.0114 1
 -1 7 -1 343.33 8.80584 7
 -1 7 -1 351.327 9.66161 21
 -1 7 -1 340.874 9.26691 24
 1 -7 1 355.473 10.0381 1
 1 -7 1 353.979 10.0132 1
 1 -7 1 353.778 9.36615 20
 1 -7 1 357.226 9.99239 23
 1 -7 1 337.174 9.74427 13
 -2 7 -1 21.4314 2.35023 13
 -2 7 -1 19.9532 2.65508 1
 -2 7 -1 20.9946 2.56189 1
 -2 7 -1 19.4076 1.72885 12
 -2 7 -1 17.3205 2.05825 21
 -2 7 -1 17.5783 1.79963 24
 -2 7 -1 17.2422 1.65997 23
 2 -7 1 18.3356 1.35793 6
 2 -7 1 18.1301 2.3001 23
 2 -7 1 18.4053 1.94846 20
 2 -7 1 17.4991 2.09692 1
 2 -7 1 18.3746 2.21236 1
 2 -7 1 17.8708 2.29402 13
 -3 7 -1 502.507 13.9038 1
 -3 7 -1 519.554 13.1916 24
 -3 7 -1 510.774 13.9113 1
 -3 7 -1 494.292 13.5986 21
 -3 7 -1 496.655 13.3803 13
 -3 7 -1 523.482 13.6568 23
 3 -7 1 515.07 13.9457 1
 3 -7 1 502.688 13.2691 20
 3 -7 1 495.005 13.8368 23
 3 -7 1 516.891 13.95 1
 3 -7 1 523.248 12.8891 7
 3 -7 1 513.45 13.8385 14
 3 -7 1 522.82 12.3737 22
 3 -7 1 508.918 13.4366 13
 -4 7 -1 2.59386 1.55379 13
 -4 7 -1 3.58912 1.3088 23
 -4 7 -1 1.53082 1.82239 1
 -4 7 -1 1.38837 1.54259 21
 -4 7 -1 -0.2692 1.77091 1
 4 -7 1 2.02677 0.56936 22
 4 -7 1 0.79125 1.556 13
 4 -7 1 1.88713 1.53412 20
 4 -7 1 -0.5676 1.86896 1
 4 -7 1 0.0574 2.07109 23
 4 -7 1 -0.0564 1.87586 1
 4 -7 1 1.33746 1.50963 14
 -5 7 -1 13.5055 2.47249 1
 -5 7 -1 13.7009 1.30088 17
 -5 7 -1 15.0688 1.74383 6
 -5 7 -1 12.6324 2.21354 1
 -5 7 -1 13.5145 2.18862 13
 5 -7 1 16.7054 2.307 1
 5 -7 1 13.9074 2.85595 23
 5 -7 1 18.4632 2.66344 1
 5 -7 1 11.4411 2.43346 14
 5 -7 1 14.3103 1.70984 4
 5 -7 1 10.8482 1.7751 20
 -6 7 -1 29.5261 3.76236 1
 -6 7 -1 34.2431 3.70224 13
 -6 7 -1 28.8202 3.14801 6
 -6 7 -1 28.7437 3.08186 1
 6 -7 1 24.3087 3.06277 14
 6 -7 1 30.8874 3.55305 1
 6 -7 1 32.3579 3.59183 1
 6 -7 1 22.8896 3.41329 23
 -7 7 -1 13.8727 2.61843 6
 -7 7 -1 6.606 1.4071 5
 -7 7 -1 7.78434 2.80672 1
 -7 7 -1 12.1477 2.79426 13
 -7 7 -1 9.49858 2.62146 1
 7 -7 1 14.7289 2.86281 1
 7 -7 1 12.2523 3.25628 23
 7 -7 1 7.67971 2.87933 14
 7 -7 1 6.13316 2.40705 1
 -8 7 -1 -1.6716 2.54962 1
 -8 7 -1 1.20294 3.23236 13
 -8 7 -1 -1.2403 2.90122 1
 -8 7 -1 -1.8419 2.99748 6
 8 -7 1 -0.001 3.40397 14
 8 -7 1 -4.5662 3.02036 23
 8 -7 1 1.42735 2.83335 1
 8 6 -1 3.43643 2.99774 24
 8 6 -1 -6.4629 2.89773 1
 8 6 -1 -0.4003 3.27183 5
 8 6 -1 10.605 3.33548 1
 -8 -6 1 -0.6938 3.77656 14
 -8 -6 1 3.81525 3.17289 20
 7 6 -1 -3.6568 2.6242 24
 7 6 -1 -3.5118 2.09869 11
 7 6 -1 0.9671 2.17247 1
 7 6 -1 -4.8913 2.32329 1
 -7 -6 1 0.52165 2.81786 14
 -7 -6 1 -3.4676 2.927 20
 -7 -6 1 1.59173 4.05187 21
 6 6 -1 5.42119 2.60307 1
 6 6 -1 8.30137 2.58739 24
 6 6 -1 11.5669 2.57132 1
 -6 -6 1 8.75564 2.30558 14
 -6 -6 1 8.41198 2.2449 20
 -6 -6 1 8.21486 2.94869 21
 -6 -6 1 9.55025 2.43762 8
 -6 -6 1 4.17741 2.62701 1
 5 6 -1 24.1469 2.99074 1
 5 6 -1 20.0132 2.27293 24
 -5 -6 1 19.211 2.53831 8
 -5 -6 1 17.8233 2.46862 21
 -5 -6 1 11.8188 2.27423 1
 -5 -6 1 18.0938 2.04302 20
 -5 -6 1 19.1455 2.29166 14
 4 6 -1 0.98568 1.59291 24
 4 6 -1 0.14634 1.98716 1
 -4 -6 1 1.70993 1.5284 1
 -4 -6 1 0.69252 1.43773 23
 -4 -6 1 0.79928 1.45846 14
 -4 -6 1 0.06867 1.67555 21
 -4 -6 1 -0.1517 1.01736 20
 3 6 -1 85.0513 3.11622 9
 3 6 -1 82.3652 4.14254 1
 3 6 -1 83.3123 3.15731 24
 -3 -6 1 83.4292 4.09823 1
 -3 -6 1 84.7989 3.39155 21
 -3 -6 1 81.2037 3.45125 14
 -3 -6 1 81.3936 3.30061 20
 2 6 -1 3.6357 1.74509 1
 2 6 -1 5.4399 1.28653 24
 2 6 -1 5.52445 1.29434 21
 -2 -6 1 6.80115 0.7148 18
 -2 -6 1 5.81191 1.24863 21
 -2 -6 1 5.6067 1.16003 11
 -2 -6 1 4.81185 1.67889 1
 -2 -6 1 6.80707 1.83515 13
 -2 -6 1 7.62926 1.42314 20
 1 6 -1 205.307 6.03556 21
 1 6 -1 201.069 6.46437 1
 1 6 -1 196.382 5.50266 3
 1 6 -1 207.019 5.38821 2
 1 6 -1 205.641 5.79419 24
 -1 -6 1 203.299 5.98078 21
 -1 -6 1 199.891 6.51576 13
 -1 -6 1 209.398 5.87267 20
 -1 -6 1 203.553 6.44179 1
 0 6 -1 12.8032 1.55101 24
 0 6 -1 10.9206 1.62823 21
 0 6 -1 12.7102 1.95539 1
 0 6 -1 9.76242 1.5944 23
 0 -6 1 12.6174 1.55481 3
 0 -6 1 11.984 0.97781 12
 0 -6 1 13.0732 1.66931 23
 0 -6 1 12.2924 1.85046 1
 0 -6 1 11.2407 1.93706 13
 0 -6 1 11.4699 1.86448 1
 0 -6 1 12.2581 1.59594 21
 0 -6 1 12.6442 1.33912 20
 -1 6 -1 8.97283 1.48794 23
 -1 6 -1 5.91683 1.75333 1
 -1 6 -1 9.42769 1.68535 13
 -1 6 -1 7.23676 1.61127 21
 -1 6 -1 8.77227 1.12655 12
 -1 6 -1 11.1777 1.29965 24
 -1 6 -1 7.91134 1.77729 1
 -1 6 -1 9.28846 1.24061 7
 1 -6 1 5.16985 1.69625 23
 1 -6 1 8.62537 1.75223 1
 1 -6 1 8.49323 1.81554 1
 1 -6 1 9.42326 1.60876 13
 1 -6 1 10.1839 1.47211 20
 -2 6 -1 177.992 5.70899 21
 -2 6 -1 182.896 5.55109 23
 -2 6 -1 185.146 5.27924 24
 -2 6 -1 180.004 5.9251 1
 -2 6 -1 178.688 5.89055 1
 -2 6 -1 177.97 5.54092 13
 2 -6 1 172.107 4.65847 6
 2 -6 1 180.257 5.91126 1
 2 -6 1 178.378 5.89462 1
 2 -6 1 176.128 4.91849 7
 2 -6 1 175.608 5.31222 20
 2 -6 1 182.403 4.47873 19
 2 -6 1 184.012 5.665 13
 -3 6 -1 91.9387 2.93732 10
 -3 6 -1 95.983 3.92838 1
 -3 6 -1 100.593 3.7813 23
 -3 6 -1 94.3405 4.0814 21
 -3 6 -1 97.3832 3.87462 13
 -3 6 -1 95.7335 3.93641 1
 3 -6 1 94.3688 3.90495 1
 3 -6 1 97.3299 3.97583 1
 3 -6 1 95.2898 3.82021 13
 3 -6 1 94.522 4.26225 14
 3 -6 1 96.1374 3.39083 20
 3 -6 1 89.1161 4.21452 23
 3 -6 1 98.0259 2.65487 22
 -4 6 -1 5.19597 1.54815 13
 -4 6 -1 1.05362 1.74651 1
 -4 6 -1 4.92418 0.82874 17
 -4 6 -1 6.11723 1.9585 1
 -4 6 -1 5.23971 1.27413 23
 -4 6 -1 4.33629 1.12335 6
 4 -6 1 1.16045 1.9591 23
 4 -6 1 2.34409 1.88264 14
 4 -6 1 1.89606 1.732 1
 4 -6 1 5.28765 1.95117 1
 -5 6 -1 133.9 5.63461 1
 -5 6 -1 143.79 5.15928 13
 -5 6 -1 134.101 4.91653 23
 -5 6 -1 142.502 4.68085 6
 -5 6 -1 143.454 5.80415 1
 5 -6 1 140.451 5.7803 1
 5 -6 1 136.133 5.69849 1
 5 -6 1 128.977 4.23118 4
 5 -6 1 132.688 5.76386 23
 5 -6 1 132.417 5.25572 14
 -6 6 -1 59.3474 4.32231 1
 -6 6 -1 70.1458 4.49449 1
 -6 6 -1 63.0819 3.60391 6
 -6 6 -1 67.6935 4.07473 13
 6 -6 1 65.7745 3.94902 1
 6 -6 1 68.2935 4.70879 23
 6 -6 1 67.8937 4.39412 1
 6 -6 1 66.1182 4.43602 14
 -7 6 -1 24.6224 2.98321 13
 -7 6 -1 27.4629 3.06227 6
 -7 6 -1 23.0177 3.19428 1
 -7 6 -1 27.9236 3.71122 1
 7 -6 1 29.0037 3.81686 1
 7 -6 1 33.4573 3.73887 1
 7 -6 1 33.4284 4.20096 14
 7 -6 1 23.6699 3.72506 23
 -8 6 -1 57.156 4.74816 1
 -8 6 -1 39.6332 3.84983 1
 -8 6 -1 49.1763 5.27363 6
 -8 6 -1 50.8342 5.4107 13
 8 -6 1 64.9396 4.87073 1
 8 -6 1 45.1375 3.87741 1
 8 -6 1 56.8446 5.57208 14
 8 -6 1 56.1115 5.49627 23
 8 5 -1 3.21034 2.68341 5
 8 5 -1 -0.0763 2.7699 24
 8 5 -1 1.52956 2.99918 11
 -8 -5 1 1.11688 3.06807 20
 -8 -5 1 -2.8871 3.38091 14
 -8 -5 1 -1.7389 2.98038 1
 -8 -5 1 5.426 5.47499 21
 7 5 -1 8.11052 2.50808 1
 7 5 -1 8.91519 2.89592 24
 7 5 -1 3.1711 2.34211 11
 7 5 -1 8.92232 2.70823 1
 -7 -5 1 6.01604 2.73585 14
 -7 -5 1 4.37541 2.6611 1
 -7 -5 1 5.21254 3.67761 21
 -7 -5 1 5.15185 2.21428 20
 6 5 -1 11.324 2.06183 11
 6 5 -1 8.42591 2.13542 24
 6 5 -1 11.5772 2.5696 1
 6 5 -1 12.4042 2.33348 1
 -6 -5 1 14.4584 2.41997 8
 -6 -5 1 14.071 1.96022 20
 -6 -5 1 14.6353 2.74835 21
 -6 -5 1 9.08808 2.49527 1
 -6 -5 1 11.4035 2.29245 14
 5 5 -1 1.45759 1.47822 11
 5 5 -1 2.74491 1.79109 24
 5 5 -1 1.82171 2.14708 1
 -5 -5 1 5.96589 1.79585 20
 -5 -5 1 0.58143 1.76081 8
 -5 -5 1 1.21246 2.0129 1
 -5 -5 1 2.52705 1.67309 14
 -5 -5 1 2.48497 1.86931 21
 4 5 -1 180.708 6.26781 1
 4 5 -1 179.271 5.60688 24
 4 5 -1 176.766 5.29887 11
 -4 -5 1 188.098 6.0102 23
 -4 -5 1 181.295 5.63028 14
 -4 -5 1 191.791 5.79175 21
 -4 -5 1 183.622 6.48733 1
 -4 -5 1 181.973 6.01194 8
 -4 -5 1 174.042 5.64251 20
 3 5 -1 5.17593 1.36646 24
 3 5 -1 5.34343 1.84002 1
 3 5 -1 5.55677 0.94039 15
 3 5 -1 5.19736 0.90886 9
 -3 -5 1 3.78846 1.57809 1
 -3 -5 1 4.63191 1.2759 14
 -3 -5 1 4.34062 1.23317 21
 -3 -5 1 6.56133 1.12768 20
 2 5 -1 16.5638 2.05745 1
 2 5 -1 18.584 1.7054 24
 -2 -5 1 20.8969 1.6717 11
 -2 -5 1 20.3614 1.75309 21
 -2 -5 1 19.7917 1.75325 20
 -2 -5 1 17.6298 2.36372 1
 1 5 -1 39.2319 2.67944 1
 1 5 -1 39.2028 2.20011 21
 1 5 -1 39.8542 1.54919 2
 1 5 -1 41.358 1.8996 3
 1 5 -1 45.3232 2.06965 24
 -1 -5 1 38.9543 2.27758 21
 -1 -5 1 39.0521 2.55261 23
 -1 -5 1 41.5209 2.69694 1
 -1 -5 1 37.5204 2.023 20
 -1 -5 1 38.2469 2.79447 13
 0 5 -1 185.064 5.76683 1
 0 5 -1 190.059 5.55652 23
 0 5 -1 175.883 5.41399 21
 0 5 -1 191.29 5.182 24
 0 5 -1 182.821 5.67801 13
 0 -5 1 178.161 5.70346 1
 0 -5 1 180.079 5.63952 23
 0 -5 1 191.911 5.22004 20
 0 -5 1 189.176 5.3629 21
 0 -5 1 175.532 5.65608 13
 0 -5 1 180.424 4.59876 12
 0 -5 1 182.777 5.09402 3
 0 -5 1 186.411 5.72934 1
 -1 5 -1 22.7075 2.37721 1
 -1 5 -1 25.4768 1.68551 24
 -1 5 -1 23.0302 2.16305 13
 -1 5 -1 24.5765 1.99603 23
 -1 5 -1 25.8327 2.20884 21
 -1 5 -1 25.1601 1.28439 12
 -1 5 -1 23.1785 2.25611 1
 -1 5 -1 26.0947 1.46626 7
 1 -5 1 18.2719 2.25809 1
 1 -5 1 26.689 1.51501 20
 1 -5 1 24.1357 2.28117 23
 1 -5 1 23.8678 2.31452 1
 1 -5 1 26.4836 2.20901 13
 -2 5 -1 509.21 12.9434 13
 -2 5 -1 504.377 13.2424 1
 -2 5 -1 494.815 13.2626 1
 -2 5 -1 511.555 13.0498 21
 -2 5 -1 515.546 13.0939 23
 -2 5 -1 527.54 12.7497 24
 2 -5 1 511.799 12.754 20
 2 -5 1 493.375 12.9267 13
 2 -5 1 509.668 13.2905 1
 2 -5 1 511.83 12.5722 7
 2 -5 1 503.763 13.1845 23
 2 -5 1 501.417 13.2491 1
 -3 5 -1 24.9105 2.12195 13
 -3 5 -1 20.9437 2.55661 1
 -3 5 -1 23.4169 2.56594 1
 -3 5 -1 23.8274 1.39951 10
 -3 5 -1 24.411 1.5654 6
 -3 5 -1 24.7207 2.04706 23
 3 -5 1 24.0221 1.37562 16
 3 -5 1 26.579 2.64998 1
 3 -5 1 28.1572 2.78992 14
 3 -5 1 25.7911 2.62065 1
 3 -5 1 21.2376 2.62431 23
 3 -5 1 24.3632 1.03191 22
 3 -5 1 25.894 2.08887 13
 -4 5 -1 164.408 5.72845 1
 -4 5 -1 171.534 5.83052 1
 -4 5 -1 173.47 4.99544 6
 -4 5 -1 169.814 5.36184 13
 -4 5 -1 166.426 4.17576 17
 -4 5 -1 179.386 5.63505 23
 4 -5 1 164.792 4.79482 4
 4 -5 1 165.537 5.75722 1
 4 -5 1 174.847 6.04581 1
 4 -5 1 168.459 5.91311 14
 4 -5 1 167.318 5.97091 23
 -5 5 -1 35.7037 3.34633 1
 -5 5 -1 36.9659 2.38002 23
 -5 5 -1 47.8718 3.56696 1
 -5 5 -1 35.5975 1.72253 16
 -5 5 -1 42.8495 3.01839 13
 5 -5 1 42.424 2.90616 14
 5 -5 1 41.812 3.43603 1
 5 -5 1 39.9313 3.48046 1
 5 -5 1 37.8351 3.59166 23
 -6 5 -1 136.872 3.91168 16
 -6 5 -1 133.466 5.67533 1
 -6 5 -1 146.123 5.49315 13
 -6 5 -1 127.031 4.00842 5
 -6 5 -1 129.9 5.90462 1
 6 -5 1 137.53 5.80544 14
 6 -5 1 142.566 6.04948 1
 6 -5 1 137.736 5.67096 1
 6 -5 1 131.473 6.04693 23
 -7 5 -1 25.9474 2.12153 16
 -7 5 -1 25.9008 3.24075 1
 -7 5 -1 22.2133 3.17692 1
 -7 5 -1 23.1403 2.97982 13
 7 -5 1 26.5325 3.23038 14
 7 -5 1 23.7439 3.09144 1
 7 -5 1 23.2362 3.72074 23
 7 -5 1 32.0713 3.8046 1
 -8 5 -1 -0.8508 2.58676 1
 -8 5 -1 -1.5638 1.66481 16
 -8 5 -1 1.66554 3.02869 13
 -8 5 -1 4.31786 2.66308 1
 8 -5 1 3.75954 2.83863 23
 8 -5 1 5.65539 2.47464 1
 8 -5 1 2.75029 2.74861 1
 8 -5 1 -0.9855 2.60295 8
 8 -5 1 4.10459 3.47018 14
 8 4 -1 5.4755 3.0247 24
 8 4 -1 -2.5069 2.1793 5
 8 4 -1 3.21797 2.33838 1
 8 4 -1 4.23214 3.14843 11
 -8 -4 1 2.9386 4.02021 4
 -8 -4 1 1.66528 3.33518 14
 -8 -4 1 2.76522 4.91954 21
 -8 -4 1 4.34904 2.76165 1
 -8 -4 1 -1.023 2.71791 20
 7 4 -1 7.54158 2.33531 1
 7 4 -1 11.3208 2.88656 24
 7 4 -1 11.4313 1.44132 18
 7 4 -1 17.3747 2.9637 1
 7 4 -1 11.7817 2.6133 11
 7 4 -1 11.6409 2.17513 5
 -7 -4 1 10.4711 3.45143 21
 -7 -4 1 15.5161 2.57762 20
 -7 -4 1 11.6415 2.73973 14
 -7 -4 1 9.48571 2.70602 1
 6 4 -1 12.9682 2.7191 1
 6 4 -1 11.0596 2.09993 11
 6 4 -1 11.5078 1.10887 18
 6 4 -1 11.7569 2.08375 24
 6 4 -1 9.02725 2.46226 1
 -6 -4 1 11.5957 2.40308 21
 -6 -4 1 12.6828 2.20234 20
 -6 -4 1 8.98722 2.43081 1
 -6 -4 1 10.601 2.1606 14
 5 4 -1 25.4515 1.10641 18
 5 4 -1 24.7666 2.49652 11
 5 4 -1 29.3808 3.27002 1
 5 4 -1 25.1234 2.30902 24
 5 4 -1 26.6634 3.36002 1
 5 4 -1 23.4537 1.20268 18
 -5 -4 1 28.2809 2.44489 20
 -5 -4 1 27.2252 3.14682 21
 -5 -4 1 27.7939 2.70507 14
 -5 -4 1 29.3018 2.80727 8
 -5 -4 1 26.1204 2.5072 23
 -5 -4 1 27.4513 3.31559 1
 4 4 -1 32.5445 2.18774 24
 4 4 -1 32.5517 2.19771 11
 4 4 -1 34.4995 3.05685 1
 -4 -4 1 35.6342 2.23052 20
 -4 -4 1 35.0178 2.4947 21
 -4 -4 1 30.8703 2.594 8
 -4 -4 1 28.4642 2.95758 1
 -4 -4 1 27.6265 2.33249 14
 -4 -4 1 34.8887 2.33974 23
 3 4 -1 0.5922 0.9674 11
 3 4 -1 -0.148 0.58271 9
 3 4 -1 -0.4274 1.18818 1
 3 4 -1 0.50562 1.07351 24
 -3 -4 1 -2.7158 1.37124 1
 -3 -4 1 0.40191 1.00287 14
 -3 -4 1 -1.9887 1.06328 23
 -3 -4 1 0.491 1.05859 21
 -3 -4 1 0.80373 0.98485 20
 2 4 -1 85.7185 2.79806 24
 2 4 -1 81.0163 3.51112 1
 2 4 -1 83.8291 2.92164 21
 -2 -4 1 86.3954 2.91319 21
 -2 -4 1 81.9774 3.51194 1
 -2 -4 1 85.5478 2.92124 20
 -2 -4 1 82.4267 2.26187 2
 1 4 -1 -0.5799 0.94416 21
 1 4 -1 0.12801 0.44317 2
 1 4 -1 -1.3487 1.32586 1
 1 4 -1 -0.7856 0.97383 24
 1 4 -1 -0.2305 0.82092 3
 -1 -4 1 0.43289 1.34621 13
 -1 -4 1 -1.291 0.94532 21
 -1 -4 1 -0.1324 0.941 20
 -1 -4 1 0.27291 1.21321 23
 -1 -4 1 -0.0662 0.9051 11
 -1 -4 1 -1.8471 1.25672 1
 -1 -4 1 -1.2834 0.44226 24
 0 4 -1 2.30466 1.1039 21
 0 4 -1 3.15949 1.36941 13
 0 4 -1 0.20514 1.40102 1
 0 4 -1 2.05213 1.18784 23
 0 4 -1 3.53281 1.1019 24
 0 -4 1 2.56544 1.05748 20
 0 -4 1 2.47768 1.35745 1
 0 -4 1 3.0479 1.32643 13
 0 -4 1 2.39556 1.08912 23
 0 -4 1 3.43856 1.11305 21
 0 -4 1 1.42781 0.4159 12
 0 -4 1 0.67392 1.37422 1
 0 -4 1 2.35765 0.63745 24
 0 -4 1 2.61468 0.956 3
 -1 4 -1 870.434 20.6231 23
 -1 4 -1 854.687 20.5084 21
 -1 4 -1 811.148 20.6733 1
 -1 4 -1 801.715 20.5299 13
 -1 4 -1 865.579 20.7762 1
 -1 4 -1 875.969 20.3389 24
 1 -4 1 844.036 20.576 13
 1 -4 1 850.922 19.9088 19
 1 -4 1 826.738 20.2614 24
 1 -4 1 836.077 20.1785 7
 1 -4 1 859.592 20.3733 20
 1 -4 1 821.618 20.7043 1
 1 -4 1 847.627 20.7355 1
 1 -4 1 840.545 20.6512 23
 -2 4 -1 53.3281 2.47504 13
 -2 4 -1 50.9911 2.81534 1
 -2 4 -1 52.7743 2.53501 23
 -2 4 -1 54.2194 2.77729 1
 -2 4 -1 55.796 1.8095 6
 2 -4 1 55.7611 1.70358 16
 2 -4 1 52.987 2.79992 1
 2 -4 1 55.4149 1.64644 22
 2 -4 1 57.3534 2.28796 20
 2 -4 1 55.1914 2.8137 14
 2 -4 1 56.7643 2.77858 23
 2 -4 1 55.5235 2.4786 13
 2 -4 1 58.5858 2.8973 1
 -3 4 -1 429.83 11.597 1
 -3 4 -1 427.85 11.6353 1
 -3 4 -1 434.885 11.2014 13
 -3 4 -1 450.148 11.4712 23
 3 -4 1 439.391 11.6804 1
 3 -4 1 412.906 11.3764 14
 3 -4 1 441.641 10.3328 22
 3 -4 1 423.884 11.6719 23
 3 -4 1 431.175 11.6169 1
 -4 4 -1 97.8813 4.04597 1
 -4 4 -1 97.1005 2.7246 16
 -4 4 -1 91.9503 3.64803 13
 -4 4 -1 106.889 3.88651 23
 -4 4 -1 100.19 4.32716 1
 -4 4 -1 97.2561 2.63573 22
 4 -4 1 102.496 4.40674 1
 4 -4 1 94.8154 3.97475 1
 4 -4 1 88.2458 4.21073 23
 4 -4 1 98.0813 3.91259 14
 -5 4 -1 65.3485 2.28968 16
 -5 4 -1 62.3941 2.46752 5
 -5 4 -1 74.698 3.37465 23
 -5 4 -1 60.8558 3.46737 1
 -5 4 -1 65.0781 2.24002 22
 -5 4 -1 68.3989 3.33508 13
 -5 4 -1 67.1176 3.59245 1
 5 -4 1 68.0919 4.07725 23
 5 -4 1 65.8643 3.55364 1
 5 -4 1 68.1791 2.75151 10
 5 -4 1 66.0366 3.82364 14
 5 -4 1 65.3349 3.55654 1
 -6 4 -1 1.06104 1.18127 16
 -6 4 -1 2.1582 2.11463 1
 -6 4 -1 0.8732 1.3893 22
 -6 4 -1 3.58199 2.16144 1
 -6 4 -1 2.06659 1.94017 13
 6 -4 1 2.53647 2.16589 1
 6 -4 1 3.36994 2.02112 14
 6 -4 1 1.96554 2.49705 23
 6 -4 1 -0.6451 1.41754 10
 6 -4 1 2.80698 2.0293 1
 -7 4 -1 0.67598 1.46691 16
 -7 4 -1 3.25603 2.22082 1
 -7 4 -1 2.3256 2.42102 13
 -7 4 -1 4.60285 2.43211 1
 7 -4 1 3.78627 1.89176 10
 7 -4 1 4.62199 2.41646 1
 7 -4 1 -2.0172 2.0678 1
 7 -4 1 -0.6427 2.38648 14
 7 -4 1 6.82404 2.97136 23
 -8 4 -1 -0.1869 2.87893 13
 -8 4 -1 -1.2056 2.65372 1
 -8 4 -1 0.49634 1.86277 16
 -8 4 -1 5.96082 2.76332 1
 8 -4 1 0.58015 2.18833 8
 8 -4 1 -4.5891 2.30769 10
 8 -4 1 0.88241 3.21654 14
 8 -4 1 0.53109 2.98172 23
 8 -4 1 3.35803 2.45343 1
 8 -4 1 0.18996 2.60426 1
 -9 4 -1 6.03609 3.25417 1
 -9 4 -1 4.13357 4.03977 13
 9 -4 1 -0.4213 3.1619 1
 9 -4 1 4.17639 4.35918 14
 9 -4 1 6.34857 3.0236 1
 8 3 -1 6.64402 2.65094 1
 8 3 -1 -1.1112 2.60918 1
 8 3 -1 3.92738 2.90482 24
 -8 -3 1 6.22204 3.2107 20
 -8 -3 1 -1.8263 2.58248 1
 -8 -3 1 3.3743 3.5225 4
 -8 -3 1 2.65497 4.60438 21
 -8 -3 1 2.87556 3.36338 14
 7 3 -1 0.2606 1.5787 1
 7 3 -1 -0.258 2.38049 1
 7 3 -1 1.44046 1.53571 5
 7 3 -1 3.192 2.05745 24
 -7 -3 1 0.38863 2.08754 1
 -7 -3 1 0.95075 2.9946 21
 -7 -3 1 0.54031 2.41788 14
 -7 -3 1 3.65359 1.98433 20
 6 3 -1 48.5346 3.87206 1
 6 3 -1 55.2211 3.07983 24
 6 3 -1 53.3314 4.18392 1
 -6 -3 1 48.9544 3.55876 14
 -6 -3 1 50.0941 3.20436 20
 -6 -3 1 49.9539 3.97198 21
 -6 -3 1 48.7718 4.06209 1
 5 3 -1 55.8997 3.71342 1
 5 3 -1 58.5663 3.90098 1
 5 3 -1 54.2224 2.82217 24
 -5 -3 1 59.6666 3.861 1
 -5 -3 1 61.0579 3.24564 14
 -5 -3 1 44.9913 2.89924 23
 -5 -3 1 58.2114 3.00069 20
 -5 -3 1 57.5731 3.1458 21
 4 3 -1 159.784 4.84696 24
 4 3 -1 153.859 5.6166 1
 4 3 -1 157.811 5.67353 1
 -4 -3 1 155.619 4.90257 14
 -4 -3 1 152.179 4.91009 20
 -4 -3 1 160.625 4.87366 21
 -4 -3 1 158.02 5.68942 1
 -4 -3 1 168.448 5.35693 23
 -4 -3 1 157.491 5.12501 8
 3 3 -1 100.34 2.49539 18
 3 3 -1 99.1889 4.0269 1
 3 3 -1 102.496 3.25408 24
 3 3 -1 94.4621 3.27086 11
 -3 -3 1 102.845 3.34992 14
 -3 -3 1 102.328 3.35913 21
 -3 -3 1 99.3853 3.62367 8
 -3 -3 1 97.979 3.24168 20
 -3 -3 1 103.694 3.7495 23
 -3 -3 1 97.1799 3.76024 1
 2 3 -1 42.7419 2.20925 1
 2 3 -1 45.4827 1.92743 24
 2 3 -1 41.0238 1.95143 11
 -2 -3 1 40.0478 1.89046 14
 -2 -3 1 44.0256 1.91507 20
 -2 -3 1 43.35 1.90739 21
 -2 -3 1 39.9667 2.51264 1
 1 3 -1 462.587 11.6088 21
 1 3 -1 485.568 11.65 24
 1 3 -1 471.815 12.01 1
 -1 -3 1 503.186 11.6423 24
 -1 -3 1 457.391 11.6032 21
 -1 -3 1 459.01 12.0444 13
 -1 -3 1 471.634 12.0146 1
 -1 -3 1 504.412 11.709 20
 -1 -3 1 474.052 11.7002 11
 0 3 -1 516.262 13.2535 1
 0 3 -1 549.35 12.9393 24
 0 3 -1 515.286 13.2393 1
 0 3 -1 534 12.7291 19
 0 3 -1 535.848 13.2124 13
 0 3 -1 554.548 13.1996 23
 0 3 -1 528.771 12.986 21
 0 -3 1 554.325 12.9842 20
 0 -3 1 521.159 13.2571 1
 0 -3 1 522.371 13.0085 3
 0 -3 1 530.432 12.9765 21
 0 -3 1 512.45 13.2415 1
 0 -3 1 522.226 13.1583 13
 0 -3 1 550.031 12.911 24
 0 -3 1 532.938 13.1983 23
 -1 3 -1 294.401 7.64542 13
 -1 3 -1 291.702 7.76994 1
 -1 3 -1 287.569 7.77647 1
 -1 3 -1 296.673 7.6832 23
 -1 3 -1 297.877 7.44183 24
 1 -3 1 314.304 7.72499 23
 1 -3 1 289.586 7.7728 1
 1 -3 1 295.947 7.8047 1
 1 -3 1 297.698 7.43239 7
 1 -3 1 292.412 7.59541 13
 1 -3 1 310.28 7.39643 24
 1 -3 1 274.247 7.43568 20
 1 -3 1 303.025 7.18528 19
 -2 3 -1 73.347 2.34798 10
 -2 3 -1 72.2565 3.10749 1
 -2 3 -1 74.9596 3.08969 1
 -2 3 -1 81.052 2.92904 23
 -2 3 -1 75.7089 2.88402 13
 2 -3 1 75.4302 2.02973 22
 2 -3 1 71.7275 3.06997 14
 2 -3 1 77.953 3.16354 1
 2 -3 1 77.5145 1.96029 16
 2 -3 1 65.5186 2.32643 24
 2 -3 1 76.9255 2.86291 23
 2 -3 1 72.2844 3.07938 1
 2 -3 1 78.0788 2.77434 13
 -3 3 -1 168.341 4.23621 22
 -3 3 -1 173.672 5.27888 23
 -3 3 -1 161.108 5.48106 1
 -3 3 -1 174.982 4.21337 16
 -3 3 -1 173.612 5.47729 1
 -3 3 -1 164.81 5.00179 13
 3 -3 1 176.444 5.54398 1
 3 -3 1 165.359 5.44496 1
 3 -3 1 167.087 5.34436 14
 3 -3 1 170.103 4.61433 10
 3 -3 1 168.217 5.40413 23
 3 -3 1 162.303 4.41776 4
 -4 3 -1 154.021 3.9793 16
 -4 3 -1 151.935 5.42714 1
 -4 3 -1 144.877 4.21893 5
 -4 3 -1 144.827 3.99099 22
 -4 3 -1 151.212 5.42813 1
 -4 3 -1 160.449 5.292 14
 -4 3 -1 155.928 4.94243 13
 -4 3 -1 151.666 5.04339 23
 4 -3 1 150.076 5.18386 14
 4 -3 1 150.213 4.45798 10
 4 -3 1 156.63 5.50363 1
 4 -3 1 143.364 5.35273 23
 4 -3 1 150.28 5.38735 1
 -5 3 -1 105.62 4.76238 1
 -5 3 -1 100.793 4.12949 23
 -5 3 -1 101.693 4.06146 13
 -5 3 -1 110.329 4.79893 1
 -5 3 -1 106.578 3.17971 16
 -5 3 -1 99.5115 3.13618 5
 5 -3 1 106.565 4.77454 1
 5 -3 1 108.011 4.80405 1
 5 -3 1 99.9712 4.46551 23
 5 -3 1 105.625 4.49628 14
 5 -3 1 107.085 3.78461 10
 -6 3 -1 14.8359 1.56888 16
 -6 3 -1 14.1155 2.70291 1
 -6 3 -1 12.3606 2.57645 1
 -6 3 -1 15.5134 2.1894 13
 6 -3 1 12.5418 2.00996 10
 6 -3 1 17.45 2.78022 1
 6 -3 1 14.9181 2.51759 14
 6 -3 1 14.795 2.45412 23
 6 -3 1 19.3338 2.75293 1
 -7 3 -1 10.3602 1.74967 16
 -7 3 -1 10.1727 2.64451 13
 -7 3 -1 11.3912 2.26945 1
 -7 3 -1 10.7192 2.69832 1
 7 -3 1 8.90094 1.90454 8
 7 -3 1 9.02025 3.04098 23
 7 -3 1 10.6025 2.72935 14
 7 -3 1 11.6138 2.32583 10
 7 -3 1 13.8505 2.92517 1
 7 -3 1 11.4495 2.2551 1
 -8 3 -1 29.804 3.09566 16
 -8 3 -1 31.2382 3.75861 13
 -8 3 -1 29.9409 3.64631 1
 8 -3 1 34.1793 4.05308 1
 8 -3 1 27.5777 4.02125 14
 8 -3 1 31.1148 4.09484 23
 8 -3 1 33.1619 4.25314 10
 8 -3 1 28.5505 3.68724 1
 -9 3 -1 -7.6322 3.03646 1
 -9 3 -1 -8.3577 3.83706 13
 -9 3 -1 1.21752 2.50572 16
 9 -3 1 4.42191 3.35091 1
 9 -3 1 -4.4399 3.09437 1
 9 -3 1 0.23414 4.40727 14
 9 -3 1 3.52794 3.55754 10
 9 -3 1 -3.8552 2.96299 23
 8 2 -1 0.4315 1.88249 1
 8 2 -1 -2.8624 3.14153 14
 8 2 -1 1.03224 2.86582 1
 -8 -2 1 3.33326 2.12424 1
 -8 -2 1 0.86121 3.26271 4
 -8 -2 1 3.02285 2.93944 14
 7 2 -1 15.6838 2.5799 1
 7 2 -1 19.5885 3.10676 1
 7 2 -1 17.3887 2.68572 14
 -7 -2 1 15.2461 3.04566 4
 -7 -2 1 13.3374 2.55699 1
 -7 -2 1 16.3121 2.83904 14
 -7 -2 1 12.1593 2.04044 20
 6 2 -1 46.8091 3.34885 1
 6 2 -1 44.2382 2.4345 5
 6 2 -1 53.4877 3.55959 14
 6 2 -1 44.1814 3.7087 1
 -6 -2 1 44.3492 3.86423 1
 -6 -2 1 44.4146 3.48961 14
 -6 -2 1 47.5277 3.06955 20
 5 2 -1 1.71376 1.37954 14
 5 2 -1 -0.14 1.78302 1
 5 2 -1 0.27145 1.73329 1
 -5 -2 1 1.94223 1.7973 1
 -5 -2 1 -1.7571 1.34988 20
 -5 -2 1 -2.5409 1.11676 23
 -5 -2 1 -0.4378 1.3753 14
 4 2 -1 592.494 15.0667 14
 4 2 -1 606.399 15.7981 1
 4 2 -1 594.935 15.7363 1
 -4 -2 1 604.669 15.1063 14
 -4 -2 1 602.165 15.7946 1
 -4 -2 1 611.728 15.5912 23
 -4 -2 1 614.702 15.169 8
 -4 -2 1 581.027 15.1188 20
 3 2 -1 13.4029 1.81976 1
 3 2 -1 11.2646 1.51189 14
 -3 -2 1 12.7276 1.52929 14
 -3 -2 1 11.3283 1.36761 8
 -3 -2 1 12.9764 1.784 1
 -3 -2 1 16.973 1.56244 20
 -3 -2 1 12.8076 1.56475 23
 2 2 -1 1806.05 41.9182 18
 2 2 -1 1769.82 42.3126 24
 2 2 -1 1765.28 42.6845 1
 -2 -2 1 1810.67 42.7219 1
 -2 -2 1 1697.19 42.2244 14
 -2 -2 1 1884.26 42.6826 23
 -2 -2 1 1793.63 42.2421 21
 -2 -2 1 1825.37 42.3731 20
 -2 -2 1 1740.96 42.5279 8
 1 2 -1 330.327 8.06756 21
 1 2 -1 332.059 8.14963 24
 1 2 -1 325.085 8.42205 1
 1 2 -1 320.27 8.23176 11
 -1 -2 1 328.007 8.24319 11
 -1 -2 1 341.832 7.85161 18
 -1 -2 1 326.729 8.0746 21
 -1 -2 1 349.487 8.1864 20
 -1 -2 1 340.76 8.12746 24
 -1 -2 1 326.008 8.41452 1
 0 2 -1 650.472 15.2046 19
 0 2 -1 658.153 15.4447 23
 0 2 -1 639.788 15.2727 24
 0 2 -1 615.089 15.473 1
 0 2 -1 673.797 15.3036 20
 0 2 -1 632.245 15.485 1
 0 2 -1 621.124 15.4551 13
 0 2 -1 636.966 15.2889 21
 0 -2 1 613.383 15.4777 1
 0 -2 1 679.546 15.2863 24
 0 -2 1 623.319 15.4437 13
 0 -2 1 645.033 15.4293 3
 0 -2 1 629.39 15.4615 1
 0 -2 1 643.754 15.4502 23
 0 -2 1 664.148 15.3165 20
 0 -2 1 617.605 15.2729 21
 -1 2 -1 123.081 3.77353 1
 -1 2 -1 126.092 3.47923 24
 -1 2 -1 128.144 3.71238 13
 -1 2 -1 129.931 3.8127 1
 -1 2 -1 130.593 3.70895 23
 1 -2 1 132.298 3.26033 22
 1 -2 1 126.778 3.70331 13
 1 -2 1 126.143 3.81207 1
 1 -2 1 139.202 3.46217 24
 1 -2 1 137.017 3.69831 23
 1 -2 1 125.064 3.66402 14
 1 -2 1 130.719 3.80617 1
 -2 2 -1 1213.32 29.3672 14
 -2 2 -1 1217.48 29.4849 1
 -2 2 -1 1226.87 29.4548 1
 -2 2 -1 1254.33 28.7729 22
 -2 2 -1 1199.19 29.2343 13
 -2 2 -1 1247.92 28.7246 16
 -2 2 -1 1258.37 29.3921 23
 2 -2 1 1139.6 28.8809 4
 2 -2 1 1244.44 29.4978 1
 2 -2 1 1211.27 29.4491 1
 2 -2 1 1238.12 28.7716 22
 2 -2 1 1229.18 29.0277 10
 2 -2 1 1241.92 29.4094 23
 2 -2 1 1181.3 29.3664 14
 -3 2 -1 94.0138 3.60409 14
 -3 2 -1 95.6663 3.79959 1
 -3 2 -1 98.6945 2.59087 16
 -3 2 -1 86.3004 2.85213 5
 -3 2 -1 93.4468 3.53515 23
 -3 2 -1 96.7003 3.83249 1
 -3 2 -1 93.1476 2.64927 22
 3 -2 1 93.9673 3.82699 1
 3 -2 1 94.1905 3.64118 14
 3 -2 1 94.2689 3.69154 23
 3 -2 1 98.6697 3.1324 10
 3 -2 1 94.752 3.74583 1
 -4 2 -1 176.492 5.97113 1
 -4 2 -1 176.879 5.63862 23
 -4 2 -1 175.404 5.78267 1
 -4 2 -1 166.725 4.75811 5
 -4 2 -1 188.824 5.83919 14
 -4 2 -1 183.218 4.70595 16
 4 -2 1 179.542 5.97779 23
 4 -2 1 184.902 6.08272 1
 4 -2 1 180.856 5.76284 14
 4 -2 1 169.976 5.72614 1
 -5 2 -1 96.1435 3.94713 23
 -5 2 -1 94.0376 3.14641 16
 -5 2 -1 98.3968 4.59875 1
 -5 2 -1 96.7619 4.59143 1
 -5 2 -1 101.374 4.35446 14
 5 -2 1 91.4493 4.53931 23
 5 -2 1 103.196 4.5932 1
 5 -2 1 95.6907 4.60175 1
 5 -2 1 100.79 4.22716 14
 -6 2 -1 65.4167 4.11238 14
 -6 2 -1 52.5013 3.99607 1
 -6 2 -1 57.1448 2.71365 16
 -6 2 -1 59.4075 4.23463 1
 6 -2 1 62.9464 4.04154 14
 6 -2 1 66.5808 4.34962 1
 6 -2 1 61.5026 4.09946 1
 6 -2 1 53.5939 2.86922 8
 6 -2 1 60.7232 4.42218 23
 -7 2 -1 61.7927 3.20471 16
 -7 2 -1 69.8676 4.71875 14
 -7 2 -1 57.218 4.51552 1
 7 -2 1 62.7288 3.04605 8
 7 -2 1 58.2314 4.49077 1
 7 -2 1 59.2176 4.53826 14
 7 -2 1 70.3809 4.8841 1
 7 -2 1 69.8354 5.02311 23
 -8 2 -1 4.31874 2.74309 1
 -8 2 -1 0.70532 2.11335 16
 8 -2 1 3.64004 2.66298 1
 8 -2 1 2.88062 3.15516 23
 8 -2 1 2.33301 2.96661 10
 8 -2 1 4.95907 3.44343 14
 8 -2 1 8.39289 2.86231 1
 -9 2 -1 3.56731 4.14274 13
 -9 2 -1 4.32978 2.69859 16
 9 -2 1 3.20548 4.64486 14
 9 -2 1 -0.3794 3.44847 1
 9 -2 1 1.1589 3.41639 23
 9 -2 1 1.84608 3.92978 10
 9 -2 1 -0.0688 3.14684 1
 9 1 -1 4.56086 4.1309 14
 9 1 -1 -5.0146 3.22081 1
 -9 -1 1 -6.2267 3.23331 1
 -9 -1 1 0.25529 2.85817 16
 -9 -1 1 -1.3001 3.93421 4
 8 1 -1 11.1566 2.79052 1
 8 1 -1 -0.0091 2.75028 1
 8 1 -1 5.42474 3.00628 14
 -8 -1 1 1.5515 2.55551 1
 -8 -1 1 5.1206 2.56175 16
 -8 -1 1 3.66028 3.16419 4
 7 1 -1 11.4497 2.26978 1
 7 1 -1 16.09 2.63128 14
 7 1 -1 15.0809 2.90891 1
 7 1 -1 7.28246 3.0049 23
 -7 -1 1 13.0564 2.63842 14
 -7 -1 1 10.8699 1.22239 9
 -7 -1 1 11.3253 2.26354 1
 -7 -1 1 13.011 2.77639 4
 -7 -1 1 11.839 1.97727 20
 6 1 -1 -0.2773 1.83876 1
 6 1 -1 3.19261 2.19875 1
 6 1 -1 0.72408 1.81441 14
 6 1 -1 1.32741 2.40597 23
 -6 -1 1 -0.5281 1.93757 4
 -6 -1 1 0.98929 1.90103 14
 -6 -1 1 -3.3858 1.80055 1
 -6 -1 1 0.40998 1.62444 20
 5 1 -1 41.6877 1.89741 5
 5 1 -1 42.3445 3.39075 23
 5 1 -1 43.751 2.94925 14
 5 1 -1 51.1507 3.51986 1
 5 1 -1 47.0787 3.32947 1
 -5 -1 1 52.2439 2.67995 20
 -5 -1 1 43.8613 2.46013 23
 -5 -1 1 45.5559 3.38278 1
 -5 -1 1 41.6897 2.92384 14
 -5 -1 1 37.6256 3.13489 4
 4 1 -1 146.608 5.24088 1
 4 1 -1 147.74 5.16308 23
 4 1 -1 145.572 4.62505 14
 4 1 -1 151.533 5.05364 1
 -4 -1 1 148.112 4.65006 14
 -4 -1 1 137.829 4.39544 20
 -4 -1 1 153.604 4.95694 23
 -4 -1 1 141.758 4.97863 1
 3 1 -1 17.84 2.22135 1
 3 1 -1 12.0203 1.78568 8
 3 1 -1 14.0484 1.64525 14
 3 1 -1 19.1509 2.27337 1
 3 1 -1 15.232 1.71524 23
 -3 -1 1 16.6712 1.54145 20
 -3 -1 1 18.0495 1.67161 14
 -3 -1 1 16.3737 1.83245 23
 -3 -1 1 16.9896 2.18374 1
 2 1 -1 9490.51 227.324 1
 2 1 -1 9119 227.08 8
 2 1 -1 9488.74 228.345 1
 2 1 -1 9425 226.29 14
 2 1 -1 9675.92 228.034 23
 -2 -1 1 9918.03 225.917 20
 -2 -1 1 9999.99 227.886 23
 -2 -1 1 9509.72 227.319 1
 -2 -1 1 9540.1 226.476 14
 -2 -1 1 9579.72 227.844 8
 1 1 -1 580.59 14.505 14
 1 1 -1 597.687 14.641 1
 1 1 -1 634.114 14.4842 20
 1 1 -1 611.132 14.4617 24
 1 1 -1 621.782 14.3281 18
 -1 -1 1 632.645 14.3394 18
 -1 -1 1 633.95 14.4911 20
 -1 -1 1 544.032 14.3765 14
 -1 -1 1 603.946 14.6486 1
 -1 -1 1 619.625 14.7097 8
 -1 1 -1 792.703 19.219 1
 -1 1 -1 822.423 18.9081 22
 -1 1 -1 774.235 19.1925 14
 -1 1 -1 789.206 19.2007 1
 -1 1 -1 818.703 18.8703 17
 -1 1 -1 848.002 19.1901 23
 -1 1 -1 782.791 19.0742 10
 1 -1 1 808.752 19.0876 10
 1 -1 1 799.692 19.2236 1
 1 -1 1 784.829 19.1804 14
 1 -1 1 794.69 19.1726 23
 1 -1 1 816.814 18.9087 22
 1 -1 1 785.172 19.1995 1
 -2 1 -1 311.044 7.61743 4
 -2 1 -1 310.349 8.2973 1
 -2 1 -1 326.712 8.18799 23
 -2 1 -1 330.895 7.65186 22
 -2 1 -1 311.42 7.78814 5
 -2 1 -1 313.331 8.19864 14
 -2 1 -1 304.723 8.24339 1
 2 -1 1 314.536 8.30967 1
 2 -1 1 300.745 8.24372 1
 2 -1 1 308.861 8.10737 14
 2 -1 1 319.118 8.22177 23
 -3 1 -1 673.302 17.4203 1
 -3 1 -1 688.901 16.7273 4
 -3 1 -1 680.799 17.4584 1
 -3 1 -1 688.8 16.7081 5
 -3 1 -1 728.576 16.6819 22
 -3 1 -1 730.297 17.3783 23
 -3 1 -1 694.544 17.2933 14
 3 -1 1 692.291 17.278 14
 3 -1 1 673.222 17.3661 23
 3 -1 1 694.872 17.4474 1
 3 -1 1 690.096 17.4906 1
 3 -1 1 682.286 16.3818 17
 -4 1 -1 23.6607 2.21361 1
 -4 1 -1 25.3045 2.66849 1
 -4 1 -1 22.3599 2.04615 23
 -4 1 -1 23.8213 2.43006 14
 -4 1 -1 21.3472 1.71432 4
 4 -1 1 24.953 2.44238 14
 4 -1 1 27.6449 2.77533 1
 4 -1 1 28.8754 2.74786 23
 4 -1 1 21.9365 1.5284 8
 4 -1 1 23.038 2.19624 1
 -5 1 -1 4.57568 1.27953 4
 -5 1 -1 5.43497 1.76939 14
 -5 1 -1 4.26887 1.6822 1
 -5 1 -1 3.83087 1.89803 1
 -5 1 -1 6.94216 1.28597 23
 5 -1 1 5.37827 1.02209 8
 5 -1 1 4.04499 1.68387 14
 5 -1 1 7.50197 2.05761 1
 5 -1 1 6.86933 1.8888 1
 5 -1 1 5.43624 2.2431 23
 -6 1 -1 49.1517 3.91977 1
 -6 1 -1 45.3248 2.99935 4
 -6 1 -1 51.0035 4.0881 14
 6 -1 1 43.5521 3.74351 1
 6 -1 1 48.4766 3.66471 14
 6 -1 1 47.5372 4.10968 23
 6 -1 1 48.2152 3.45352 1
 -7 1 -1 33.0392 2.91625 16
 -7 1 -1 33.345 3.91665 1
 -7 1 -1 30.184 3.22583 4
 -7 1 -1 26.6698 3.3273 14
 7 -1 1 25.0045 3.13817 1
 7 -1 1 37.0303 4.24492 14
 7 -1 1 44.6754 4.09265 1
 7 -1 1 28.7723 3.6383 23
 -8 1 -1 19.7138 3.62255 14
 -8 1 -1 12.8054 3.1757 1
 -8 1 -1 13.9777 2.45499 16
 8 -1 1 8.74261 2.81241 1
 8 -1 1 16.342 3.72989 14
 8 -1 1 18.2972 3.22803 1
 8 -1 1 14.4169 3.44258 23
 -9 1 -1 3.01156 3.15084 1
 -9 1 -1 12.854 2.93662 16
 9 -1 1 9.7723 4.41159 10
 9 -1 1 11.811 3.91325 23
 9 -1 1 15.9091 3.83327 1
 9 -1 1 13.6965 3.22639 1
 9 -1 1 11.7647 4.67132 14
 9 0 -1 -2.4896 2.97319 1
 9 0 -1 -0.2894 3.15224 1
 9 0 -1 8.82101 4.2987 14
 -9 0 1 4.38491 2.92509 16
 -9 0 1 1.7667 3.2167 1
 -9 0 1 7.09134 3.72305 4
 8 0 -1 9.28294 2.9822 1
 8 0 -1 7.68319 3.16924 14
 8 0 -1 2.46543 3.12678 23
 8 0 -1 -1.3921 2.22843 1
 -8 0 1 -0.3007 2.63298 1
 -8 0 1 5.15761 2.95865 4
 -8 0 1 3.92172 2.41837 16
 7 0 -1 2.96345 2.29991 1
 7 0 -1 4.2266 2.31831 1
 7 0 -1 -0.2056 2.40378 14
 7 0 -1 -4.9794 2.41202 23
 -7 0 1 -2.6881 1.95347 16
 -7 0 1 1.10658 2.16304 4
 -7 0 1 -3.119 2.06496 1
 6 0 -1 66.0823 4.40411 23
 6 0 -1 71.4681 3.77488 14
 6 0 -1 68.8636 4.2249 1
 6 0 -1 72.8884 4.40677 1
 -6 0 1 73.001 4.38008 1
 -6 0 1 70.0171 3.84707 14
 -6 0 1 73.4143 3.99092 4
 5 0 -1 104.507 4.01768 14
 5 0 -1 102.581 4.63453 23
 5 0 -1 99.2044 3.88787 8
 5 0 -1 100.075 4.26072 1
 5 0 -1 107.61 4.61491 1
 -5 0 1 107.545 3.89029 20
 -5 0 1 105.875 4.63294 1
 -5 0 1 104.877 4.20198 14
 -5 0 1 107.75 4.13402 23
 -5 0 1 106.633 4.22987 4
 4 0 -1 155.168 4.91603 14
 4 0 -1 151.449 4.81181 8
 4 0 -1 159.995 5.42354 1
 4 0 -1 160.417 5.24385 1
 -4 0 1 159.392 4.99923 4
 -4 0 1 156.256 4.67333 20
 -4 0 1 156.663 5.20665 1
 -4 0 1 161.913 5.12035 23
 -4 0 1 160.909 4.99041 14
 3 0 -1 820.36 20.5881 8
 3 0 -1 847.972 20.8778 23
 3 0 -1 845.917 20.9064 1
 3 0 -1 834.781 20.5483 14
 3 0 -1 832.045 20.0297 5
 3 0 -1 857.358 20.9895 1
 -3 0 1 837.384 20.5629 14
 -3 0 1 849.519 20.7415 4
 -3 0 1 863.757 20.5315 20
 -3 0 1 874.605 20.9812 1
 -3 0 1 874.428 20.8637 23
 -3 0 1 830.384 20.9051 1
 2 0 -1 632.384 15.1918 14
 2 0 -1 619.35 15.3393 8
 2 0 -1 640.424 15.4239 23
 2 0 -1 634.617 15.4894 1
 2 0 -1 622.179 15.4534 1
 -2 0 1 634.783 15.1992 14
 -2 0 1 666.583 15.4282 23
 -2 0 1 633.645 15.3916 4
 -2 0 1 568.069 15.1194 20
 -2 0 1 627.927 15.459 1
 -2 0 1 631.165 15.4753 1
 1 0 -1 1076.71 24.111 20
 1 0 -1 992.931 24.3127 4
 1 0 -1 993.72 24.2205 1
 1 0 -1 1001.41 24.1077 17
 1 0 -1 985.44 24.2302 1
 1 0 -1 1011.85 24.2087 23
 1 0 -1 1023.44 24.1221 18
 -1 0 1 982.331 24.2167 1
 -1 0 1 1047.72 24.1051 20
 -1 0 1 1034.28 24.209 23
 -1 0 1 990.249 24.3053 4
 -1 0 1 1004.51 24.2372 1
 -1 0 1 1061.9 24.1521 16
 -1 0 1 1043.72 24.1167 17
 -1 0 -1 8.03635 1.0184 23
 -1 0 -1 7.30573 0.9131 1
 -1 0 -1 8.33533 1.11743 5
 -1 0 -1 7.11462 0.79487 20
 -1 0 -1 5.77294 0.92275 1
 -1 0 -1 10.214 0.70147 22
 -1 0 -1 6.64578 0.9133 14
 1 0 1 6.81449 0.9116 1
 1 0 1 7.14546 0.91954 23
 1 0 1 6.39543 0.94956 1
 1 0 1 7.16254 1.04531 5
 1 0 1 6.83783 0.9175 14
 1 0 1 7.68255 0.7914 20
 -2 0 -1 200.207 5.72216 1
 -2 0 -1 208.493 5.34476 20
 -2 0 -1 194.835 5.73575 1
 -2 0 -1 209.711 5.65259 23
 -2 0 -1 206.832 5.63157 14
 2 0 1 201.846 5.77151 1
 2 0 1 212.481 5.31885 5
 2 0 1 197.012 5.72747 1
 2 0 1 201.686 5.67436 23
 2 0 1 195.515 5.60432 14
 -3 0 -1 578.868 14.1189 23
 -3 0 -1 556.975 14.0056 14
 -3 0 -1 531.35 14.1917 1
 -3 0 -1 556.537 14.2207 1
 -3 0 -1 540.593 13.7206 20
 3 0 1 555.723 13.9933 14
 3 0 1 541.978 14.194 1
 3 0 1 558.081 13.5467 5
 3 0 1 554.785 14.1543 23
 3 0 1 557.612 14.2593 1
 -4 0 -1 15.2664 1.68789 20
 -4 0 -1 14.0502 1.67705 23
 -4 0 -1 15.4264 2.05273 1
 -4 0 -1 14.3983 1.75477 14
 4 0 1 14.048 2.05412 1
 4 0 1 15.1838 1.80711 14
 4 0 1 14.2588 2.10859 23
 4 0 1 13.9661 1.51467 5
 4 0 1 16.3899 2.0468 1
 -5 0 -1 130.159 4.56832 20
 -5 0 -1 132.278 5.28511 1
 -5 0 -1 131.96 4.74045 23
 -5 0 -1 137.233 5.00746 14
 5 0 1 133.658 5.36384 1
 5 0 1 132.271 5.2973 1
 5 0 1 121.134 5.27136 23
 5 0 1 129.875 4.93198 14
 -6 0 -1 -1.5555 1.61085 4
 -6 0 -1 2.4795 2.21692 1
 -6 0 -1 -4.2371 1.81415 14
 6 0 1 0.28222 2.13372 1
 6 0 1 -0.3714 2.03801 1
 6 0 1 0.17278 1.91781 23
 6 0 1 -3.1242 1.84398 14
 -7 0 -1 7.28562 2.6866 14
 -7 0 -1 7.01445 2.41274 1
 -7 0 -1 6.85768 2.24927 4
 7 0 1 9.58446 2.81196 14
 7 0 1 6.11014 3.04654 23
 7 0 1 8.27019 2.40573 1
 7 0 1 9.22793 2.73455 1
 -8 0 -1 9.30028 2.79526 4
 -8 0 -1 6.57992 2.50196 16
 -8 0 -1 10.1868 2.90201 1
 -8 0 -1 7.50631 3.48888 14
 8 0 1 11.8151 2.7524 1
 8 0 1 9.51095 3.36406 14
 8 0 1 14.0073 3.05775 23
 8 0 1 20.3571 3.48498 1
 9 -1 -1 15.9342 4.6606 14
 9 -1 -1 11.2874 3.84027 23
 9 -1 -1 13.6839 3.49763 1
 9 -1 -1 8.30888 3.06325 1
 -9 1 1 11.6432 2.96258 16
 -9 1 1 18.1449 3.41261 1
 8 -1 -1 1.3995 2.66807 1
 8 -1 -1 -3.4907 2.96919 23
 8 -1 -1 -3.6954 2.27757 1
 8 -1 -1 1.68778 3.11681 14
 -8 1 1 0.99708 2.27471 16
 -8 1 1 -0.893 2.65867 1
 7 -1 -1 35.0498 3.74115 14
 7 -1 -1 30.7867 3.83379 1
 7 -1 -1 26.1018 3.54579 23
 7 -1 -1 33.3219 3.34599 8
 7 -1 -1 25.6844 3.51055 1
 -7 1 1 29.9988 2.85953 16
 -7 1 1 31.4874 3.86257 1
 -7 1 1 36.7168 3.64662 4
 6 -1 -1 17.4992 2.14587 8
 6 -1 -1 17.9095 2.72017 23
 6 -1 -1 20.7927 2.50527 14
 6 -1 -1 19.087 2.76421 1
 6 -1 -1 20.8653 2.63394 1
 -6 1 1 24.1508 2.34511 16
 -6 1 1 18.0656 2.64914 1
 -6 1 1 24.226 2.57683 23
 -6 1 1 21.375 2.7895 4
 5 -1 -1 32.3772 2.85286 14
 5 -1 -1 30.3974 3.05563 1
 5 -1 -1 25.2439 3.02618 23
 5 -1 -1 31.9528 2.99725 1
 5 -1 -1 24.8823 2.45034 8
 -5 1 1 29.4325 2.99108 1
 -5 1 1 31.6199 2.30516 23
 -5 1 1 26.9065 2.40237 4
 -5 1 1 32.2014 2.08356 16
 -5 1 1 31.5525 3.10159 1
 4 -1 -1 60.3391 3.2725 1
 4 -1 -1 56.202 2.79772 14
 4 -1 -1 65.5881 3.30485 1
 -4 1 1 57.5093 3.20985 1
 -4 1 1 56.602 2.79688 4
 -4 1 1 64.034 3.27057 1
 -4 1 1 60.8255 2.26834 16
 -4 1 1 60.9962 2.70051 23
 3 -1 -1 54.4435 2.70308 23
 3 -1 -1 51.9181 2.40013 14
 3 -1 -1 53.6557 2.82274 1
 3 -1 -1 55.9619 2.78324 1
 -3 1 1 53.9811 2.54508 23
 -3 1 1 54.9576 2.81127 1
 -3 1 1 56.1475 1.92413 16
 -3 1 1 52.0145 2.41566 4
 -3 1 1 54.7013 1.78362 17
 -3 1 1 54.7271 2.78362 1
 2 -1 -1 1182.41 28.6384 1
 2 -1 -1 1141.89 28.4329 14
 2 -1 -1 1225.87 28.5799 23
 2 -1 -1 1176.52 28.597 1
 2 -1 -1 1160.83 28.4852 4
 -2 1 1 1189.44 28.5017 4
 -2 1 1 1222.73 28.2474 16
 -2 1 1 1220.31 28.1572 17
 -2 1 1 1163.73 28.5976 1
 -2 1 1 1241.24 28.5866 23
 -2 1 1 1193.06 28.6303 1
 1 -1 -1 782.224 18.563 16
 1 -1 -1 760.911 18.6894 6
 1 -1 -1 788.44 18.7199 1
 1 -1 -1 762.491 18.6954 1
 1 -1 -1 799.816 18.4094 22
 1 -1 -1 740.891 18.598 13
 1 -1 -1 800.81 18.5529 17
 1 -1 -1 782.21 18.6753 23
 -1 1 1 786.816 18.4305 22
 -1 1 1 830.135 18.563 17
 -1 1 1 788.179 18.6772 23
 -1 1 1 809.621 18.5714 16
 -1 1 1 771.849 18.6561 21
 -1 1 1 786.964 18.7197 1
 -1 1 1 770.701 18.6958 6
 -1 1 1 773.997 18.703 1
 0 -1 -1 854.538 20.5882 23
 0 -1 -1 901.726 20.3898 16
 0 -1 -1 827.502 20.5843 3
 0 1 1 815.957 20.4259 21
 0 1 1 818.894 20.4768 2
 0 1 1 887.52 20.3643 18
 0 1 1 936.024 20.3337 20
 0 1 1 913.718 20.4577 16
 0 1 1 801.645 20.4914 9
 -1 -1 -1 41.1217 1.71602 15
 -1 -1 -1 44.4615 1.801 23
 -1 -1 -1 41.5472 1.79309 9
 -1 -1 -1 44.3435 1.94537 1
 -1 -1 -1 44.2199 1.54524 20
 -1 -1 -1 44.6669 1.72044 21
 -1 -1 -1 44.0726 1.91436 14
 1 1 1 44.1836 1.96836 1
 1 1 1 43.4569 1.87575 14
 1 1 1 42.9669 1.33728 18
 1 1 1 41.6835 1.45015 20
 -2 -1 -1 171.918 4.96755 23
 -2 -1 -1 171.453 4.89887 14
 -2 -1 -1 173.924 4.59164 20
 -2 -1 -1 169.909 5.067 1
 2 1 1 171.355 5.10815 1
 2 1 1 168.209 5.08408 1
 2 1 1 173.025 4.93481 23
 2 1 1 164.891 4.88296 14
 -3 -1 -1 71.3075 2.79405 20
 -3 -1 -1 78.7564 3.12821 14
 -3 -1 -1 70.9017 3.40366 1
 -3 -1 -1 75.0426 3.10526 23
 3 1 1 73.2793 3.38287 1
 3 1 1 76.0732 2.74292 5
 3 1 1 77.6445 3.09208 14
 3 1 1 69.7643 3.39566 1
 3 1 1 77.1189 3.10817 23
 -4 -1 -1 39.5091 2.24201 20
 -4 -1 -1 38.2647 2.56775 1
 -4 -1 -1 39.9621 2.4 23
 -4 -1 -1 40.3058 2.62593 14
 4 1 1 39.8633 2.63221 1
 4 1 1 39.7597 2.1517 5
 4 1 1 33.8558 2.9817 23
 4 1 1 39.834 2.61377 14
 4 1 1 36.8038 2.56068 1
 -5 -1 -1 2.0033 1.53711 20
 -5 -1 -1 1.76941 1.86627 1
 -5 -1 -1 1.2442 1.60619 14
 -5 -1 -1 -0.2328 1.03756 23
 5 1 1 -0.0932 1.89767 23
 5 1 1 1.27095 1.79084 1
 5 1 1 1.023 1.10222 5
 5 1 1 2.69244 1.99892 1
 5 1 1 -0.5761 1.4832 14
 -6 -1 -1 -2.8172 1.83311 1
 -6 -1 -1 3.99584 2.17207 14
 -6 -1 -1 -0.0925 1.86904 20
 6 1 1 0.41699 1.91579 14
 6 1 1 0.90514 2.45895 23
 6 1 1 0.88005 1.93667 1
 6 1 1 1.89287 2.33969 1
 -7 -1 -1 0.36752 1.64109 1
 -7 -1 -1 -0.9371 1.57541 9
 -7 -1 -1 1.81521 2.18224 4
 -7 -1 -1 -0.5281 1.60705 15
 -7 -1 -1 -4.0073 2.36951 14
 7 1 1 -0.08 2.46164 14
 7 1 1 -2.1828 2.55523 23
 7 1 1 0.30656 2.56348 1
 7 1 1 0.91898 1.63947 1
 -8 -1 -1 2.84043 1.83811 9
 -8 -1 -1 3.41546 2.70406 1
 -8 -1 -1 4.00072 1.85388 15
 -8 -1 -1 3.20845 3.47721 14
 -8 -1 -1 3.50953 2.99037 4
 8 1 1 4.73332 2.67918 1
 8 1 1 4.74579 3.58627 14
 8 1 1 6.04942 2.84666 1
 9 -2 -1 1.45743 4.32313 14
 9 -2 -1 -0.8069 3.23243 10
 9 -2 -1 5.47385 3.37065 1
 9 -2 -1 -0.8114 2.94615 1
 9 -2 -1 -8.5865 3.27279 23
 -9 2 1 0.75436 3.50549 13
 -9 2 1 6.82522 3.13243 1
 -9 2 1 1.23316 2.67094 16
 8 -2 -1 7.54403 2.85994 1
 8 -2 -1 -2.4917 2.38115 1
 8 -2 -1 3.485 2.54765 8
 8 -2 -1 2.03209 3.00665 14
 8 -2 -1 3.36009 3.22053 23
 -8 2 1 2.61045 2.27528 16
 -8 2 1 0.05975 2.597 13
 -8 2 1 0.09316 2.47764 1
 7 -2 -1 1.70311 2.11045 8
 7 -2 -1 -0.085 1.6652 1
 7 -2 -1 1.50896 2.3041 14
 7 -2 -1 -0.8057 2.57161 23
 7 -2 -1 -0.5591 2.12887 1
 -7 2 1 0.64915 1.77136 1
 -7 2 1 2.47337 1.894 1
 -7 2 1 1.03181 1.77841 16
 6 -2 -1 23.8708 3.23049 1
 6 -2 -1 23.1167 2.89945 8
 6 -2 -1 19.6679 2.43001 14
 6 -2 -1 20.9676 2.78581 1
 6 -2 -1 22.064 2.83028 23
 -6 2 1 18.8004 2.73167 1
 -6 2 1 23.8906 2.63495 23
 -6 2 1 20.2315 2.16423 16
 -6 2 1 21.8474 2.83764 1
 5 -2 -1 18.3606 2.06341 14
 5 -2 -1 23.3706 2.80705 1
 5 -2 -1 16.2058 2.42809 23
 5 -2 -1 16.504 2.23406 1
 -5 2 1 19.9046 1.79181 16
 -5 2 1 16.2815 2.27905 1
 -5 2 1 22.4761 1.82724 23
 -5 2 1 18.7903 2.39098 1
 4 -2 -1 0.08412 1.34557 14
 4 -2 -1 -2.6596 1.62758 23
 4 -2 -1 1.1735 1.54502 1
 4 -2 -1 1.88796 1.20603 1
 -4 2 1 -0.3814 1.54293 1
 -4 2 1 -0.2834 0.88067 16
 -4 2 1 1.99383 1.2157 23
 -4 2 1 0.63826 1.20484 1
 3 -2 -1 0.89187 1.01713 4
 3 -2 -1 0.17294 1.26152 1
 3 -2 -1 -0.4366 1.16394 23
 3 -2 -1 0.39651 1.30349 1
 3 -2 -1 0.44054 1.17223 14
 -3 2 1 1.02634 0.93203 23
 -3 2 1 0.14077 0.73783 13
 -3 2 1 1.378 0.57126 17
 -3 2 1 0.9286 0.73075 16
 -3 2 1 0.76674 1.28785 1
 -3 2 1 0.89421 1.3163 1
 2 -2 -1 785.757 19.4872 23
 2 -2 -1 812.131 19.5634 1
 2 -2 -1 807.639 19.5894 1
 -2 2 1 806.751 19.5816 1
 -2 2 1 832.179 19.0484 17
 -2 2 1 807.164 19.4882 23
 -2 2 1 773.898 19.0479 13
 -2 2 1 781.753 19.3401 6
 -2 2 1 782.124 19.5377 1
 -2 2 1 820.641 19.1013 16
 1 -2 -1 61.7553 1.79983 19
 1 -2 -1 62.353 2.41395 21
 1 -2 -1 63.5961 2.2406 23
 1 -2 -1 65.2422 1.96923 20
 1 -2 -1 64.8029 1.68349 22
 1 -2 -1 64.3139 1.90324 16
 1 -2 -1 63.5315 1.90158 24
 1 -2 -1 62.7534 1.99901 13
 1 -2 -1 62.1716 2.25711 1
 1 -2 -1 61.6271 2.282 1
 1 -2 -1 60.3408 2.14835 6
 -1 2 1 64.9689 2.02249 13
 -1 2 1 65.134 2.20622 23
 -1 2 1 65.4184 2.44729 21
 -1 2 1 63.6292 2.31144 1
 -1 2 1 64.0862 1.92207 16
 -1 2 1 63.4185 2.22944 12
 -1 2 1 60.8374 2.2529 1
 -1 2 1 65.6792 1.98829 24
 0 -2 -1 122.631 3.43584 23
 0 -2 -1 123.291 3.21063 20
 0 -2 -1 115.724 3.47157 1
 0 -2 -1 114.924 3.4525 21
 0 -2 -1 121.32 3.14389 24
 0 -2 -1 118.54 3.433 2
 0 2 1 114.549 3.46774 21
 0 2 1 120.804 3.18958 20
 0 2 1 120.486 3.19182 24
 0 2 1 114.393 3.41086 2
 0 2 1 111.803 3.4747 1
 0 2 1 120.216 3.41009 23
 0 2 1 121.699 3.181 18
 -1 -2 -1 217.243 5.26447 24
 -1 -2 -1 197.243 5.5152 21
 -1 -2 -1 213.9 5.30169 20
 -1 -2 -1 204.295 5.09931 18
 -1 -2 -1 205.235 5.64599 1
 1 2 1 202.029 5.50281 15
 1 2 1 208.076 5.4869 9
 1 2 1 198.504 5.66654 1
 1 2 1 204.895 5.53786 21
 1 2 1 215.303 5.11495 18
 1 2 1 206.109 5.30901 24
 -2 -2 -1 76.8686 3.19528 1
 -2 -2 -1 79.2258 2.91862 21
 -2 -2 -1 76.7139 2.67146 15
 -2 -2 -1 78.0862 2.66244 20
 -2 -2 -1 77.9197 2.67511 9
 -2 -2 -1 84.3158 3.03419 23
 -2 -2 -1 76.2486 2.89489 14
 2 2 1 83.2776 2.56625 24
 2 2 1 80.4279 2.22416 18
 2 2 1 76.3856 3.17161 1
 -3 -2 -1 22.9189 2.1072 14
 -3 -2 -1 23.1267 1.44199 8
 -3 -2 -1 26.1156 1.82622 23
 -3 -2 -1 25.1942 1.79933 20
 -3 -2 -1 22.524 2.47945 1
 -3 -2 -1 19.6062 1.65475 15
 -3 -2 -1 20.7524 1.65128 9
 3 2 1 22.8566 2.50159 1
 3 2 1 21.2547 2.10536 14
 3 2 1 25.5117 2.52945 1
 -4 -2 -1 35.068 2.97618 1
 -4 -2 -1 38.781 2.60959 14
 -4 -2 -1 34.622 1.98074 9
 -4 -2 -1 36.1567 2.00134 15
 -4 -2 -1 31.3037 2.24357 23
 -4 -2 -1 36.2604 2.27978 20
 4 2 1 34.541 2.95387 1
 4 2 1 36.7255 2.52248 14
 4 2 1 37.3148 3.00673 1
 4 2 1 35.7096 2.25351 5
 -5 -2 -1 1.95041 1.91174 1
 -5 -2 -1 2.03361 1.3865 23
 -5 -2 -1 0.49214 1.10904 15
 -5 -2 -1 1.27305 1.55251 20
 -5 -2 -1 -0.7711 1.57574 14
 -5 -2 -1 -0.4783 1.05641 9
 5 2 1 -1.5328 1.78745 1
 5 2 1 0.38384 1.26286 5
 5 2 1 2.16023 1.89592 1
 5 2 1 0.91431 1.5841 14
 -6 -2 -1 26.901 2.95065 1
 -6 -2 -1 25.2396 2.28396 9
 -6 -2 -1 27.0174 2.41214 20
 -6 -2 -1 30.493 3.38462 14
 -6 -2 -1 27.7247 2.30228 15
 6 2 1 29.9766 3.65523 1
 6 2 1 29.9429 3.33646 14
 6 2 1 26.7698 2.79658 5
 6 2 1 24.6378 2.94747 1
 -7 -2 -1 11.092 1.60025 9
 -7 -2 -1 11.5235 2.92975 14
 -7 -2 -1 13.3572 2.56326 20
 -7 -2 -1 5.46069 2.39768 1
 -7 -2 -1 13.1144 1.63935 15
 7 2 1 14.239 2.41183 1
 7 2 1 9.86321 2.2699 1
 7 2 1 10.6634 2.82751 14
 -8 -2 -1 0.29946 3.20066 4
 -8 -2 -1 2.34723 3.41697 14
 -8 -2 -1 4.27951 2.75854 1
 8 2 1 0.69989 2.44525 1
 8 2 1 1.9363 3.6302 14
 8 2 1 2.2459 2.52159 18
 8 2 1 7.25065 2.44318 1
 9 -3 -1 0.74523 2.96111 1
 9 -3 -1 -2.0414 3.45132 23
 9 -3 -1 9.66704 3.4028 1
 9 -3 -1 -0.7839 2.82248 10
 9 -3 -1 0.97424 3.19371 8
 9 -3 -1 2.64978 4.29738 14
 -9 3 1 1.86101 2.59092 16
 -9 3 1 2.15708 3.35431 13
 -9 3 1 -7.8624 2.96002 1
 8 -3 -1 -0.5871 3.09012 23
 8 -3 -1 6.4817 2.80022 1
 8 -3 -1 -0.5431 2.17144 10
 8 -3 -1 -2.0643 2.0479 1
 8 -3 -1 4.77764 3.22511 14
 8 -3 -1 1.80563 2.58933 8
 -8 3 1 1.57693 2.17777 16
 -8 3 1 -0.399 2.47003 13
 -8 3 1 -1.4454 2.27916 1
 7 -3 -1 0.28622 2.01632 23
 7 -3 -1 -0.3243 2.31377 1
 7 -3 -1 0.78706 2.02325 1
 7 -3 -1 -0.1402 2.44044 14
 7 -3 -1 -2.8854 2.13522 8
 -7 3 1 -0.7058 2.19054 1
 -7 3 1 -1.6036 1.70308 16
 -7 3 1 -1.1187 2.22848 1
 -7 3 1 -0.4371 1.90966 13
 6 -3 -1 33.1046 3.77842 23
 6 -3 -1 42.9761 3.65069 1
 6 -3 -1 39.7621 3.56742 1
 6 -3 -1 41.6999 3.46618 14
 -6 3 1 36.4569 2.05912 22
 -6 3 1 39.6841 2.82698 13
 -6 3 1 44.3193 3.03184 23
 -6 3 1 42.0051 3.63488 1
 -6 3 1 38.4176 2.52013 16
 -6 3 1 41.8351 3.74102 1
 5 -3 -1 14.891 2.37394 23
 5 -3 -1 17.7763 2.29842 1
 5 -3 -1 16.4339 1.96972 14
 5 -3 -1 19.3109 2.26387 1
 -5 3 1 15.9076 2.30853 1
 -5 3 1 15.8564 1.12714 22
 -5 3 1 18.8969 2.03957 13
 -5 3 1 17.4075 1.68177 16
 -5 3 1 17.479 1.98503 23
 -5 3 1 15.625 2.06917 1
 4 -3 -1 12.7162 1.86984 1
 4 -3 -1 11.3897 1.7499 14
 4 -3 -1 7.80473 1.93728 23
 4 -3 -1 11.3017 1.49578 4
 4 -3 -1 14.2658 1.89076 1
 -4 3 1 11.9774 1.31007 16
 -4 3 1 10.932 1.80685 1
 -4 3 1 11.8873 1.58996 13
 -4 3 1 13.7027 1.63992 23
 -4 3 1 13.7471 1.93322 1
 -4 3 1 12.311 1.09577 17
 3 -3 -1 53.9573 2.778 14
 3 -3 -1 57.4555 2.87193 1
 3 -3 -1 56.2749 2.83483 23
 3 -3 -1 53.4892 2.54397 4
 3 -3 -1 56.9159 2.97969 1
 -3 3 1 60.0004 2.96699 1
 -3 3 1 61.1833 2.70899 23
 -3 3 1 56.1069 2.44735 6
 -3 3 1 56.3683 2.64234 1
 -3 3 1 51.2555 1.96517 16
 -3 3 1 57.1172 2.16164 13
 -3 3 1 60.3464 1.89819 17
 2 -3 -1 47.7065 1.8267 13
 2 -3 -1 49.7683 1.7473 24
 2 -3 -1 50.4835 1.2483 22
 2 -3 -1 48.5458 2.51145 1
 2 -3 -1 47.5162 2.41197 23
 2 -3 -1 47.4001 2.45397 1
 -2 3 1 47.8588 2.4808 1
 -2 3 1 48.0267 2.4606 1
 -2 3 1 49.4423 1.86917 13
 -2 3 1 51.2931 1.72092 17
 -2 3 1 51.3038 2.46143 21
 -2 3 1 50.0157 1.73674 16
 -2 3 1 50.6631 2.29263 23
 -2 3 1 46.4392 2.09491 6
 1 -3 -1 143.003 4.28127 1
 1 -3 -1 147.814 4.24734 23
 1 -3 -1 150.413 3.83951 24
 1 -3 -1 143.813 4.08038 13
 1 -3 -1 137.048 4.26293 1
 1 -3 -1 146.268 4.21455 21
 1 -3 -1 143.402 3.53105 19
 1 -3 -1 134.713 3.90511 20
 -1 3 1 133.009 4.31315 21
 -1 3 1 153.106 3.91928 24
 -1 3 1 137.96 4.03191 12
 -1 3 1 146.724 4.1822 23
 -1 3 1 140.32 4.30718 1
 -1 3 1 139.568 4.26134 1
 0 -3 -1 94.0317 2.63281 24
 0 -3 -1 85.4958 3.16682 1
 0 -3 -1 90.0268 3.11752 23
 0 -3 -1 94.9553 2.76539 20
 0 -3 -1 90.0171 3.10527 21
 0 -3 -1 87.6811 3.15252 1
 0 3 1 84.9663 3.11555 21
 0 3 1 89.7451 3.03112 23
 0 3 1 82.8661 3.17114 1
 0 3 1 91.7561 2.72508 24
 0 3 1 85.6889 2.93274 2
 -1 -3 -1 302.675 8.01579 1
 -1 -3 -1 303.997 7.54393 24
 -1 -3 -1 294.806 7.65517 2
 -1 -3 -1 304.851 7.6362 20
 -1 -3 -1 297.494 7.79766 21
 1 3 1 304.992 7.36197 18
 1 3 1 301.633 7.84024 21
 1 3 1 293.313 7.92372 1
 1 3 1 301.935 7.59959 24
 -2 -3 -1 39.6344 2.28373 14
 -2 -3 -1 40.7258 2.24155 21
 -2 -3 -1 43.365 1.97224 20
 -2 -3 -1 41.72 2.57075 1
 2 3 1 42.6665 2.60809 1
 2 3 1 42.4293 2.0241 15
 2 3 1 42.9552 1.42766 18
 2 3 1 41.514 1.99133 9
 2 3 1 42.4111 1.95048 24
 -3 -3 -1 665.016 16.5592 23
 -3 -3 -1 639.314 16.0893 20
 -3 -3 -1 655.265 16.2426 21
 -3 -3 -1 634.958 16.5903 1
 -3 -3 -1 643.206 16.3188 14
 3 3 1 627.794 16.5834 1
 3 3 1 666.374 15.5132 18
 3 3 1 648.406 16.0467 24
 -4 -3 -1 20.4933 2.29795 14
 -4 -3 -1 20.3883 2.44029 21
 -4 -3 -1 16.9783 2.17659 1
 -4 -3 -1 18.7547 1.92591 23
 -4 -3 -1 15.7355 1.69047 8
 -4 -3 -1 17.6333 1.5933 20
 4 3 1 17.6336 1.3642 18
 4 3 1 17.5759 1.84549 24
 4 3 1 17.0556 2.18367 1
 4 3 1 17.0275 2.32011 1
 -5 -3 -1 119.616 4.80173 23
 -5 -3 -1 125.721 4.99959 21
 -5 -3 -1 133.803 5.52344 1
 -5 -3 -1 135.46 5.08351 14
 -5 -3 -1 130.217 4.77604 20
 5 3 1 127.033 3.90652 18
 5 3 1 130.628 5.47944 1
 5 3 1 128.644 4.55833 24
 5 3 1 139.389 5.63907 1
 5 3 1 138.272 4.76265 5
 -6 -3 -1 -2.2737 2.03641 14
 -6 -3 -1 1.46818 1.46478 20
 -6 -3 -1 0.04265 1.97225 1
 -6 -3 -1 1.22497 2.31449 21
 6 3 1 -3.3217 2.0035 1
 6 3 1 -2.7772 1.62428 1
 6 3 1 -0.65 1.65348 5
 6 3 1 -1.5046 1.72382 24
 6 3 1 1.38415 1.4955 18
 -7 -3 -1 3.37749 3.74236 21
 -7 -3 -1 12.0529 3.06047 14
 -7 -3 -1 6.39826 2.68361 1
 -7 -3 -1 9.25102 2.50405 20
 7 3 1 8.3189 2.45232 1
 7 3 1 8.7449 2.87661 1
 7 3 1 11.0731 2.88359 24
 7 3 1 13.2363 2.09168 18
 7 3 1 11.1532 2.23095 5
 -8 -3 -1 8.70541 3.34309 20
 -8 -3 -1 8.63869 2.98423 1
 -8 -3 -1 9.43992 3.99235 14
 -8 -3 -1 11.9325 3.95064 4
 8 3 1 11.6266 2.55633 18
 8 3 1 10.2685 3.08263 24
 8 3 1 15.6706 3.10402 1
 8 3 1 9.29725 2.90275 1
 9 -4 -1 5.3427 3.59068 23
 9 -4 -1 14.0961 3.55416 1
 9 -4 -1 5.57989 3.52833 8
 9 -4 -1 3.30637 4.58645 14
 -9 4 1 -1.1912 4.26686 6
 -9 4 1 1.99465 2.662 16
 -9 4 1 5.88291 3.33841 13
 -9 4 1 11.9738 3.53662 1
 8 -4 -1 7.92641 1.76713 10
 8 -4 -1 11.3317 3.48294 23
 8 -4 -1 6.99904 2.9591 8
 8 -4 -1 7.0534 3.30872 14
 8 -4 -1 12.6765 2.99389 1
 8 -4 -1 7.57825 2.65528 1
 -8 4 1 8.01244 2.9665 1
 -8 4 1 7.94932 2.22817 16
 -8 4 1 12.3131 2.74333 13
 -8 4 1 11.3792 2.87831 1
 7 -4 -1 1.41781 1.65023 1
 7 -4 -1 3.18097 2.40393 1
 7 -4 -1 -0.2447 2.46012 14
 7 -4 -1 2.17672 1.24648 10
 7 -4 -1 0.89678 2.65968 23
 -7 4 1 -0.0652 2.44694 1
 -7 4 1 1.24378 1.80822 1
 -7 4 1 0.43632 1.70779 16
 -7 4 1 0.64897 1.91427 13
 6 -4 -1 19.8392 2.80622 1
 6 -4 -1 16.7342 2.64275 1
 6 -4 -1 20.0378 1.56965 10
 6 -4 -1 20.9842 2.54311 14
 6 -4 -1 19.5939 2.95796 23
 -6 4 1 22.8247 2.8319 1
 -6 4 1 20.967 2.57809 13
 -6 4 1 17.0043 2.72458 1
 -6 4 1 21.1257 2.05892 16
 5 -4 -1 15.4864 2.2114 1
 5 -4 -1 11.6534 1.97999 14
 5 -4 -1 14.2599 1.78223 4
 5 -4 -1 15.373 2.23656 1
 5 -4 -1 12.3062 2.34077 23
 -5 4 1 13.1655 1.49194 13
 -5 4 1 13.0372 1.42676 16
 -5 4 1 15.3111 1.73557 23
 -5 4 1 14.8696 2.17583 1
 -5 4 1 14.2218 1.98943 6
 -5 4 1 11.05 2.10688 1
 -5 4 1 14.4318 1.31733 17
 4 -4 -1 56.2818 3.23982 1
 4 -4 -1 54.1322 2.98187 23
 4 -4 -1 55.4187 2.71746 4
 4 -4 -1 55.0531 2.96303 1
 4 -4 -1 54.4682 3.20746 14
 -4 4 1 56.7671 3.2355 1
 -4 4 1 59.941 2.02858 17
 -4 4 1 56.746 2.6821 6
 -4 4 1 54.3457 2.43547 13
 -4 4 1 56.0368 3.34612 1
 -4 4 1 56.6621 2.81468 23
 -4 4 1 56.4222 2.21648 16
 3 -4 -1 477.382 12.6561 23
 3 -4 -1 493.603 12.8371 1
 3 -4 -1 479.579 12.7428 1
 3 -4 -1 482.936 12.0635 13
 -3 4 1 488.689 11.9081 16
 -3 4 1 482.365 12.2417 6
 -3 4 1 498.088 11.8748 17
 -3 4 1 488.431 12.7855 1
 -3 4 1 479.144 12.7672 1
 -3 4 1 508.701 12.6716 23
 -3 4 1 470.044 12.5326 21
 -3 4 1 481.592 12.0634 13
 2 -4 -1 39.9224 2.3798 23
 2 -4 -1 40.178 1.88693 20
 2 -4 -1 36.2546 2.43764 1
 2 -4 -1 36.3943 1.85548 13
 2 -4 -1 39.5285 1.88042 6
 2 -4 -1 39.693 2.41405 1
 -2 4 1 37.0005 2.51952 21
 -2 4 1 37.5238 2.41959 1
 -2 4 1 38.1863 1.58688 16
 -2 4 1 38.6773 2.14552 23
 -2 4 1 40.7318 2.46547 1
 -2 4 1 40.045 1.96945 13
 -2 4 1 39.7089 1.89412 24
 1 -4 -1 867.131 21.4772 23
 1 -4 -1 914.935 21.2178 20
 1 -4 -1 849.238 21.3163 13
 1 -4 -1 867.615 21.4533 21
 1 -4 -1 873.561 21.5618 1
 1 -4 -1 873.534 21.1024 24
 1 -4 -1 894.086 21.593 1
 -1 4 1 914.246 21.472 23
 -1 4 1 861.161 21.5249 1
 -1 4 1 875.849 21.1445 24
 -1 4 1 877.317 21.5851 1
 -1 4 1 872.24 21.2258 12
 0 -4 -1 396.065 10.2338 23
 0 -4 -1 380.035 9.74765 24
 0 -4 -1 400.841 9.89216 20
 0 -4 -1 400.738 10.1416 21
 0 -4 -1 384.978 10.2745 1
 0 -4 -1 379.549 10.2621 1
 0 4 1 386.864 10.138 21
 0 4 1 380.884 10.279 1
 0 4 1 412.338 10.2297 23
 0 4 1 392.455 10.057 2
 0 4 1 403.176 9.85149 24
 -1 -4 -1 333.897 8.4302 20
 -1 -4 -1 317.471 8.39062 2
 -1 -4 -1 328.569 8.60077 21
 -1 -4 -1 330.286 8.88891 1
 1 4 1 324.504 8.8601 1
 1 4 1 333.293 8.37671 24
 -2 -4 -1 150.375 4.59915 21
 -2 -4 -1 141.199 4.93971 1
 -2 -4 -1 148.412 4.39107 20
 2 4 1 151.34 4.71157 21
 2 4 1 143.193 4.43842 9
 2 4 1 139.645 4.97215 1
 2 4 1 145.339 4.48173 15
 2 4 1 146.549 4.33754 24
 2 4 1 150.262 3.80259 18
 -3 -4 -1 5.45647 1.75477 1
 -3 -4 -1 4.02445 1.24843 20
 -3 -4 -1 3.20028 1.36558 14
 -3 -4 -1 5.20158 1.09704 23
 -3 -4 -1 6.34824 1.34686 21
 3 4 1 5.55202 1.32257 24
 3 4 1 3.98437 1.7181 1
 3 4 1 6.54964 0.74683 18
 -4 -4 -1 102.964 4.2094 21
 -4 -4 -1 103.203 4.59502 1
 -4 -4 -1 105.488 4.01458 23
 -4 -4 -1 98.3626 3.82234 20
 -4 -4 -1 101.638 4.07453 14
 4 4 1 96.8492 2.93234 11
 4 4 1 101.74 4.5919 1
 4 4 1 95.5877 3.70169 24
 4 4 1 99.1775 2.88897 18
 -5 -4 -1 3.03812 2.00532 21
 -5 -4 -1 1.00115 1.22476 8
 -5 -4 -1 1.92649 1.90254 14
 -5 -4 -1 3.83265 1.73465 20
 -5 -4 -1 -3.1253 1.62564 23
 -5 -4 -1 1.70923 1.61373 1
 5 4 1 0.5214 1.61269 24
 5 4 1 4.24025 1.69557 1
 5 4 1 2.48154 1.08325 18
 5 4 1 3.29893 2.22299 1
 5 4 1 2.784 1.12056 11
 -6 -4 -1 53.5058 3.59004 20
 -6 -4 -1 57.9997 4.79342 21
 -6 -4 -1 57.2857 3.82294 1
 -6 -4 -1 61.3934 4.18379 14
 6 4 1 61.4656 3.96578 5
 6 4 1 68.289 4.6383 1
 6 4 1 60.3561 2.99902 11
 6 4 1 58.5296 3.41677 24
 6 4 1 57.831 2.68059 18
 6 4 1 59.0511 3.80708 1
 -7 -4 -1 15.1923 2.79662 20
 -7 -4 -1 14.674 2.85823 1
 -7 -4 -1 13.4507 4.22097 21
 -7 -4 -1 13.1206 3.28553 14
 7 4 1 14.3301 2.71436 1
 7 4 1 17.5652 3.16417 24
 7 4 1 10.2636 3.09905 1
 7 4 1 14.5408 2.12196 11
 7 4 1 16.469 2.67593 5
 7 4 1 12.4962 1.87209 18
 -8 -4 -1 -0.3492 2.61085 1
 -8 -4 -1 -0.3392 3.16768 20
 -8 -4 -1 -2.744 3.61525 14
 8 4 1 10.2459 3.21398 1
 8 4 1 1.24135 2.59925 11
 8 4 1 2.02758 2.81558 5
 8 4 1 -3.8297 2.53165 1
 8 4 1 0.0723 2.73536 24
 9 -5 -1 2.26084 4.78823 14
 9 -5 -1 7.1951 3.18911 1
 9 -5 -1 4.62374 3.53243 23
 9 -5 -1 0.53629 3.83734 8
 9 -5 -1 11.5522 3.36969 1
 -9 5 1 -3.678 3.15239 1
 -9 5 1 3.07707 2.63028 16
 -9 5 1 2.14806 4.14217 6
 -9 5 1 -1.0194 3.3056 1
 -9 5 1 2.90067 3.20558 13
 8 -5 -1 9.19963 3.32192 23
 8 -5 -1 5.34183 2.80456 1
 8 -5 -1 12.8512 2.92759 1
 8 -5 -1 4.44149 3.40334 14
 -8 5 1 8.76305 2.95483 1
 -8 5 1 2.22086 3.12342 6
 -8 5 1 6.75093 2.98016 1
 -8 5 1 1.98728 2.1422 16
 -8 5 1 4.50838 2.55197 13
 7 -5 -1 39.7697 3.87976 1
 7 -5 -1 26.2847 3.55528 23
 7 -5 -1 38.0064 4.04315 1
 7 -5 -1 37.8962 4.189 14
 -7 5 1 28.5982 3.25828 13
 -7 5 1 31.5585 2.72824 16
 -7 5 1 26.7104 3.4435 1
 -7 5 1 30.9774 4.01583 6
 -7 5 1 38.5293 4.0696 1
 6 -5 -1 2.11187 2.01842 1
 6 -5 -1 1.853 1.91043 1
 6 -5 -1 -1.1743 2.29305 23
 6 -5 -1 -3.0018 2.02238 14
 -6 5 1 -0.0199 2.08744 1
 -6 5 1 -2.367 1.70358 6
 -6 5 1 -0.9256 1.42275 16
 -6 5 1 -2.7845 1.77528 1
 -6 5 1 0.52746 1.50569 13
 5 -5 -1 20.6153 2.67568 23
 5 -5 -1 23.6609 2.50281 4
 5 -5 -1 29.2299 3.16828 1
 5 -5 -1 25.5236 2.96179 14
 5 -5 -1 21.7568 2.64623 1
 -5 5 1 26.4914 2.675 6
 -5 5 1 26.6872 2.3036 13
 -5 5 1 25.5319 1.87075 16
 -5 5 1 25.435 3.1481 1
 -5 5 1 34.5114 2.40271 23
 -5 5 1 26.0907 1.61098 17
 -5 5 1 24.5339 3.0775 1
 4 -5 -1 99.9485 4.32803 1
 4 -5 -1 93.5743 4.28967 23
 4 -5 -1 94.1529 4.20028 1
 4 -5 -1 88.7868 3.61997 4
 4 -5 -1 93.4055 4.23351 14
 -4 5 1 96.7746 4.29017 1
 -4 5 1 97.7405 2.97188 17
 -4 5 1 93.5963 3.47913 6
 -4 5 1 96.4556 3.06473 16
 -4 5 1 98.547 4.16124 21
 -4 5 1 92.1379 4.1942 1
 -4 5 1 95.0415 3.39627 13
 -4 5 1 94.5036 3.72634 23
 3 -5 -1 11.108 1.55176 1
 3 -5 -1 10.1288 1.38312 20
 3 -5 -1 7.6262 1.75594 1
 3 -5 -1 10.4223 1.22357 13
 -3 5 1 13.7677 1.35644 17
 -3 5 1 10.3487 1.54067 1
 -3 5 1 9.91608 1.25436 6
 -3 5 1 8.91167 1.22962 13
 -3 5 1 10.892 1.49029 23
 -3 5 1 11.281 1.17597 16
 -3 5 1 9.66378 1.74242 1
 -3 5 1 9.5913 1.82428 21
 2 -5 -1 1.26819 1.40365 1
 2 -5 -1 1.55539 0.46285 19
 2 -5 -1 1.7219 0.96451 6
 2 -5 -1 0.64096 1.01125 20
 2 -5 -1 2.31782 1.00682 13
 2 -5 -1 1.8869 1.39688 1
 2 -5 -1 -1.1245 1.35 23
 -2 5 1 2.24043 1.08487 12
 -2 5 1 -0.1217 1.38055 1
 -2 5 1 0.94586 1.3514 21
 -2 5 1 2.41118 1.12158 13
 -2 5 1 -0.7247 1.03696 23
 -2 5 1 2.73528 1.16769 24
 -2 5 1 1.57208 1.41643 1
 1 -5 -1 17.1115 1.78702 1
 1 -5 -1 17.4514 2.08911 23
 1 -5 -1 19.2394 1.98855 13
 1 -5 -1 17.6804 1.80993 1
 1 -5 -1 16.2949 1.74373 21
 1 -5 -1 21.4111 1.56598 20
 -1 5 1 20.3476 1.60809 24
 -1 5 1 15.2361 1.80254 21
 -1 5 1 20.181 1.7077 12
 -1 5 1 15.4914 1.81806 23
 -1 5 1 19.9727 2.22519 1
 -1 5 1 18.6504 1.82208 1
 0 -5 -1 611.589 15.7607 1
 0 -5 -1 613.143 15.2593 12
 0 -5 -1 614.33 14.7186 3
 0 -5 -1 614.088 15.7948 1
 0 -5 -1 613.206 15.5758 21
 0 -5 -1 621.651 15.318 20
 0 -5 -1 619.639 15.7284 23
 0 -5 -1 626.808 15.7278 13
 0 5 1 639.764 15.7009 23
 0 5 1 625.947 15.5045 2
 0 5 1 612.318 15.7761 1
 0 5 1 639.598 15.2988 24
 0 5 1 609.948 15.596 21
 -1 -5 -1 0.10405 1.08864 1
 -1 -5 -1 3.14763 1.42928 23
 -1 -5 -1 0.63659 1.16532 21
 -1 -5 -1 1.76184 1.00108 20
 1 5 1 0.10624 1.3072 21
 1 5 1 1.02619 1.47622 1
 1 5 1 1.71386 1.10294 24
 -2 -5 -1 1.56388 1.08036 20
 -2 -5 -1 1.45615 1.1772 21
 -2 -5 -1 0.19802 0.93949 2
 -2 -5 -1 0.35381 1.53659 1
 2 5 1 -0.2897 1.51832 1
 2 5 1 -0.0545 1.16652 9
 2 5 1 1.85238 1.18248 24
 2 5 1 -0.4093 1.27329 21
 2 5 1 -0.683 1.08726 15
 -3 -5 -1 9.37552 1.62984 14
 -3 -5 -1 8.74674 1.56539 21
 -3 -5 -1 6.55045 1.38745 20
 -3 -5 -1 8.41879 1.8134 1
 3 5 1 8.32267 1.29792 9
 3 5 1 8.24445 1.3752 15
 3 5 1 8.457 1.71591 1
 3 5 1 6.54506 1.44661 24
 3 5 1 9.05684 0.81615 18
 -4 -5 -1 44.2977 2.82054 23
 -4 -5 -1 44.8636 3.47883 1
 -4 -5 -1 45.7524 3.1022 14
 -4 -5 -1 39.5179 3.07395 21
 -4 -5 -1 41.5718 2.65544 20
 4 5 1 44.1349 2.62498 24
 4 5 1 43.3561 1.55007 18
 4 5 1 50.4256 3.63342 1
 -5 -5 -1 1.77048 2.15382 14
 -5 -5 -1 5.55547 2.14654 21
 -5 -5 -1 3.30029 1.58401 8
 -5 -5 -1 1.52067 2.00813 1
 -5 -5 -1 4.01092 1.83931 20
 5 5 1 3.72022 2.18607 1
 5 5 1 5.61578 0.89582 18
 5 5 1 6.40826 2.41308 1
 5 5 1 1.85847 1.75999 24
 -6 -5 -1 50.6061 4.20011 14
 -6 -5 -1 53.3985 4.29796 1
 -6 -5 -1 46.7098 3.61745 20
 -6 -5 -1 45.9436 4.9814 21
 6 5 1 50.6584 4.1708 1
 6 5 1 46.7448 3.63674 1
 6 5 1 48.6928 4.11222 5
 6 5 1 42.7586 1.77111 18
 -7 -5 -1 8.11325 2.69925 1
 -7 -5 -1 4.10908 4.32916 21
 -7 -5 -1 6.84237 3.07037 14
 7 5 1 7.99342 2.62086 1
 7 5 1 10.4089 2.98217 24
 7 5 1 13.5636 2.76901 1
 7 5 1 10.2656 2.90308 5
 -8 -5 -1 11.5512 3.47453 1
 -8 -5 -1 10.2189 4.28039 14
 -8 -5 -1 6.56599 3.10335 20
 8 5 1 8.62441 3.20307 24
 8 5 1 10.759 3.02863 1
 8 5 1 19.4 3.62504 1
 8 5 1 6.35256 3.52137 5
 8 -6 -1 49.2638 5.28905 23
 8 -6 -1 43.9825 4.64021 1
 8 -6 -1 52.6827 6.11459 14
 8 -6 -1 53.5802 4.97686 1
 -8 6 1 50.1291 4.4719 13
 -8 6 1 48.7036 4.99383 1
 -8 6 1 54.9992 5.45688 21
 -8 6 1 42.1231 3.41754 16
 -8 6 1 40.8506 4.71168 1
 -8 6 1 59.4249 4.95798 6
 7 -6 -1 2.97941 2.50126 14
 7 -6 -1 -0.3825 2.70759 23
 7 -6 -1 -0.4901 1.74248 1
 7 -6 -1 4.59082 2.55162 1
 -7 6 1 -0.4522 1.83069 1
 -7 6 1 2.56372 2.5182 1
 -7 6 1 3.66971 2.49453 6
 -7 6 1 2.13323 2.00356 13
 -7 6 1 -1.2546 1.69209 16
 -7 6 1 0.12935 2.7877 21
 6 -6 -1 44.1345 3.37631 4
 6 -6 -1 45.1894 3.87063 1
 6 -6 -1 40.9994 3.93555 14
 6 -6 -1 45.0086 3.80806 1
 6 -6 -1 48.5186 4.22079 23
 -6 6 1 45.4162 3.94006 1
 -6 6 1 44.2311 3.88264 1
 -6 6 1 48.6817 3.61208 6
 -6 6 1 50.0495 4.4774 21
 -6 6 1 43.0234 2.61213 16
 -6 6 1 41.0849 1.97125 17
 -6 6 1 45.0896 3.13998 13
 5 -6 -1 33.1079 3.26202 1
 5 -6 -1 22.7631 2.91934 23
 5 -6 -1 22.0288 2.70362 1
 5 -6 -1 29.2912 3.39301 14
 5 -6 -1 27.7405 2.82641 4
 -5 6 1 24.5301 2.47904 13
 -5 6 1 29.4477 2.45647 23
 -5 6 1 26.4968 2.1088 16
 -5 6 1 29.3994 2.4704 6
 -5 6 1 25.2155 3.27345 1
 -5 6 1 24.3194 1.82252 17
 -5 6 1 29.6898 3.3859 21
 -5 6 1 24.9416 3.25567 1
 4 -6 -1 23.2518 2.73981 1
 4 -6 -1 16.3343 2.41344 23
 4 -6 -1 16.8307 1.60574 20
 4 -6 -1 18.5668 2.35817 1
 4 -6 -1 17.5862 2.22247 14
 -4 6 1 19.4152 2.16076 13
 -4 6 1 20.3644 2.45276 1
 -4 6 1 20.4939 1.72375 16
 -4 6 1 18.7302 2.23299 1
 -4 6 1 19.3066 1.72733 17
 -4 6 1 18.7627 1.97387 23
 -4 6 1 21.2734 2.36021 21
 -4 6 1 19.1623 2.09794 6
 3 -6 -1 0.05764 1.64124 23
 3 -6 -1 -0.4912 1.00733 20
 3 -6 -1 -0.3413 1.36319 1
 3 -6 -1 1.77011 1.12706 13
 3 -6 -1 0.32652 1.5167 1
 -3 6 1 -0.963 1.5065 1
 -3 6 1 1.59225 1.23373 1
 -3 6 1 -1.1612 0.98465 23
 -3 6 1 -0.5219 1.11139 13
 -3 6 1 -0.51 1.55615 21
 2 -6 -1 7.0257 1.68807 1
 2 -6 -1 7.61369 1.35721 13
 2 -6 -1 7.71535 1.26716 6
 2 -6 -1 8.19083 1.71479 21
 2 -6 -1 9.15094 1.28084 20
 2 -6 -1 6.77756 1.62627 1
 -2 6 1 7.54298 1.46732 21
 -2 6 1 7.47536 1.49927 13
 -2 6 1 7.07437 1.66828 1
 -2 6 1 6.78343 1.6815 1
 -2 6 1 7.26171 1.36501 23
 -2 6 1 8.1594 1.36149 24
 -2 6 1 7.91673 1.36137 12
 1 -6 -1 53.7012 3.12139 1
 1 -6 -1 55.2607 3.08632 21
 1 -6 -1 51.7773 2.9984 23
 1 -6 -1 59.6098 3.20704 1
 1 -6 -1 57.2096 2.92063 13
 1 -6 -1 54.4041 2.41807 20
 -1 6 1 56.2326 3.20784 1
 -1 6 1 57.6824 3.1605 1
 -1 6 1 53.3689 2.53645 23
 -1 6 1 56.2495 2.47872 24
 -1 6 1 57.7362 3.20701 21
 0 -6 -1 1.23464 1.10669 20
 0 -6 -1 0.15886 1.16642 1
 0 -6 -1 0.04669 1.41925 13
 0 -6 -1 -0.0683 1.48706 23
 0 -6 -1 2.3585 1.31838 21
 0 -6 -1 0.22293 1.52844 1
 0 -6 -1 -0.2315 0.9871 12
 0 -6 -1 0.80241 0.44908 3
 0 6 1 -0.7025 1.12282 23
 0 6 1 0.51112 1.21189 2
 0 6 1 1.02039 1.23828 1
 0 6 1 0.5876 0.95241 24
 0 6 1 0.0172 1.45951 21
 -1 -6 -1 132.585 4.91258 1
 -1 -6 -1 133.542 4.25935 20
 -1 -6 -1 133.246 4.5327 21
 1 6 1 131.044 4.91032 1
 1 6 1 136.82 4.68453 21
 1 6 1 134.147 4.20437 24
 1 6 1 134.173 4.21337 2
 -2 -6 -1 4.99819 0.76987 11
 -2 -6 -1 6.68436 1.19034 2
 -2 -6 -1 5.20049 1.40311 21
 -2 -6 -1 6.5092 1.26005 20
 -2 -6 -1 4.43486 1.38849 1
 2 6 1 6.90096 1.52592 21
 2 6 1 6.1167 1.3682 24
 2 6 1 5.33798 1.46035 9
 2 6 1 5.67551 1.47401 15
 2 6 1 4.39595 1.85309 1
 -3 -6 -1 86.8583 4.26683 1
 -3 -6 -1 83.6295 3.48973 20
 -3 -6 -1 91.4343 3.85425 21
 -3 -6 -1 87.4324 3.89717 14
 -3 -6 -1 88.1539 3.36138 2
 3 6 1 93.1568 3.58584 9
 3 6 1 88.0943 3.70784 15
 3 6 1 92.496 4.39404 1
 3 6 1 90.7179 3.48696 24
 -4 -6 -1 9.16275 1.75811 23
 -4 -6 -1 3.87781 1.68142 1
 -4 -6 -1 6.99045 1.89996 14
 -4 -6 -1 6.9508 2.12223 21
 -4 -6 -1 3.83496 1.48527 20
 4 6 1 4.5363 1.68877 24
 4 6 1 6.14303 2.26574 1
 -5 -6 -1 48.1758 4.27079 21
 -5 -6 -1 42.7455 3.38149 8
 -5 -6 -1 35.1734 3.78508 1
 -5 -6 -1 42.2041 3.10734 20
 -5 -6 -1 44.7557 4.07264 14
 5 6 1 43.7513 3.49827 1
 5 6 1 43.1223 2.97521 24
 -6 -6 -1 12.063 2.90919 14
 -6 -6 -1 11.5293 2.55722 1
 -6 -6 -1 14.9982 2.54865 20
 -6 -6 -1 19.1394 3.66152 21
 -6 -6 -1 14.617 2.25381 8
 6 6 1 15.8329 2.40402 1
 6 6 1 18.4964 3.04342 1
 6 6 1 14.1386 2.83615 24
 -7 -6 -1 -3.0581 3.37579 14
 -7 -6 -1 1.61598 2.80004 20
 -7 -6 -1 -2.3889 2.05598 1
 7 6 1 0.49885 3.16535 5
 7 6 1 2.00846 2.68246 1
 7 6 1 1.07869 2.54128 24
 8 -7 -1 0.93562 3.36949 23
 8 -7 -1 9.83223 2.83387 1
 8 -7 -1 9.63928 3.73483 14
 8 -7 -1 3.30113 2.64374 1
 -8 7 1 12.1633 2.92517 1
 -8 7 1 6.38538 3.64987 21
 -8 7 1 0.90911 2.91007 1
 -8 7 1 2.87865 2.3172 16
 -8 7 1 3.65478 3.14799 6
 -8 7 1 2.59992 2.6816 13
 7 -7 -1 10.1094 3.06831 23
 7 -7 -1 7.74614 2.82695 14
 7 -7 -1 1.02512 2.34732 1
 7 -7 -1 8.94313 2.49238 1
 -7 7 1 9.81836 3.16715 21
 -7 7 1 4.7026 1.92701 16
 -7 7 1 11.9304 2.77138 1
 -7 7 1 1.94907 2.60678 1
 -7 7 1 8.81051 2.61026 6
 -7 7 1 5.28891 2.22258 13
 6 -7 -1 45.7985 4.12898 14
 6 -7 -1 48.8302 3.97217 1
 6 -7 -1 39.7471 4.30515 23
 6 -7 -1 41.4318 3.46881 4
 6 -7 -1 45.4818 4.05379 1
 -6 7 1 38.3938 2.24106 17
 -6 7 1 46.6732 4.14917 1
 -6 7 1 47.6248 4.67864 21
 -6 7 1 41.5723 4.12773 1
 -6 7 1 41.1504 3.59153 6
 -6 7 1 38.5867 3.31101 13
 -6 7 1 35.4974 2.69876 16
 5 -7 -1 34.8138 3.15044 4
 5 -7 -1 32.5167 3.5714 1
 5 -7 -1 36.3491 3.09953 14
 5 -7 -1 30.3937 2.66972 20
 5 -7 -1 30.3161 3.75576 23
 5 -7 -1 30.322 3.50969 1
 -5 7 1 34.4105 2.76114 13
 -5 7 1 31.3985 3.49304 1
 -5 7 1 29.8199 2.80687 23
 -5 7 1 31.0298 2.88483 6
 -5 7 1 36.4291 2.22969 17
 -5 7 1 30.5452 3.45776 1
 -5 7 1 41.7918 3.92868 21
 4 -7 -1 141.452 5.6041 1
 4 -7 -1 136.444 4.80842 20
 4 -7 -1 133.647 5.59207 23
 4 -7 -1 141.524 4.79456 13
 4 -7 -1 146.383 5.61697 1
 -4 7 1 140.808 5.59839 1
 -4 7 1 141.843 5.53487 21
 -4 7 1 142.013 4.39122 17
 -4 7 1 135.431 4.84442 13
 -4 7 1 148.409 5.06797 23
 -4 7 1 140.102 5.53764 1
 3 -7 -1 182.689 4.80441 7
 3 -7 -1 186.988 4.66187 19
 3 -7 -1 182.539 5.65848 20
 3 -7 -1 182.377 5.50069 6
 3 -7 -1 192.013 6.37923 1
 3 -7 -1 193.22 6.45292 1
 3 -7 -1 194.304 6.47249 23
 3 -7 -1 185.31 5.68339 13
 -3 7 1 181.507 5.75397 12
 -3 7 1 186.624 5.73592 13
 -3 7 1 178.075 6.37068 1
 -3 7 1 186.58 5.64747 24
 -3 7 1 180.219 6.10157 21
 -3 7 1 185.875 6.1715 1
 -3 7 1 182.704 5.90259 23
 2 -7 -1 9.22174 1.45832 20
 2 -7 -1 8.8985 2.10326 23
 2 -7 -1 9.86154 1.90907 1
 2 -7 -1 11.1358 1.44298 6
 2 -7 -1 10.4584 1.89769 1
 2 -7 -1 9.16741 1.83985 21
 2 -7 -1 9.43665 1.65812 13
 -2 7 1 10.1277 1.43492 12
 -2 7 1 9.71345 1.82385 21
 -2 7 1 10.7549 1.53885 24
 -2 7 1 10.0103 1.47092 23
 -2 7 1 7.6844 1.85749 1
 -2 7 1 9.59807 1.96765 1
 1 -7 -1 221.139 6.94384 23
 1 -7 -1 219.356 6.74554 13
 1 -7 -1 221.812 6.73817 21
 1 -7 -1 215.201 6.25286 20
 1 -7 -1 218.515 6.93909 1
 1 -7 -1 214.178 6.77913 1
 -1 7 1 209.385 6.79618 1
 -1 7 1 219.083 6.67225 21
 -1 7 1 214.092 6.23256 24
 -1 7 1 222.475 6.62775 23
 -1 7 1 214.884 6.78935 1
 0 -7 -1 56.4236 3.29677 13
 0 -7 -1 57.8339 3.04564 21
 0 -7 -1 53.3739 2.50255 12
 0 -7 -1 55.3571 2.97823 1
 0 -7 -1 55.7718 3.48201 23
 0 -7 -1 51.4422 3.24551 1
 0 -7 -1 55.5785 2.60783 20
 0 7 1 51.9283 2.89729 2
 0 7 1 52.8614 2.89842 21
 0 7 1 58.0087 2.44759 24
 0 7 1 53.8064 2.86591 23
 0 7 1 56.0228 3.07607 1
 -1 -7 -1 4.77919 1.2626 20
 -1 -7 -1 3.83318 1.4106 1
 -1 -7 -1 2.5975 1.49874 23
 -1 -7 -1 5.285 1.44035 21
 1 7 1 3.09761 1.21833 2
 1 7 1 1.97337 1.64945 21
 1 7 1 2.21389 1.75603 1
 1 7 1 1.53401 1.23606 24
 -2 -7 -1 49.3138 2.0322 11
 -2 -7 -1 46.3236 3.45158 23
 -2 -7 -1 50.6015 2.97391 21
 -2 -7 -1 47.7388 2.60177 20
 -2 -7 -1 44.6615 3.21734 1
 2 7 1 43.6744 2.48809 24
 2 7 1 46.6559 1.58397 3
 2 7 1 48.1913 3.40196 1
 2 7 1 45.8705 3.31479 21
 -3 -7 -1 19.0289 2.55001 1
 -3 -7 -1 23.5913 3.11243 14
 -3 -7 -1 21.1842 2.1945 20
 -3 -7 -1 21.9381 2.20556 2
 -3 -7 -1 21.1238 2.24843 21
 3 7 1 25.5933 2.26161 24
 3 7 1 21.724 2.77323 1
 3 7 1 26.7002 2.8558 15
 3 7 1 23.3671 2.56391 9
 -4 -7 -1 53.1898 3.13392 20
 -4 -7 -1 56.914 4.04159 14
 -4 -7 -1 56.833 3.02493 2
 -4 -7 -1 52.7197 3.99202 1
 -4 -7 -1 53.8037 4.27225 21
 4 7 1 49.2518 3.4893 1
 4 7 1 54.0626 3.13086 24
 -5 -7 -1 22.9885 3.12926 1
 -5 -7 -1 28.9055 3.06795 2
 -5 -7 -1 25.527 3.30104 21
 -5 -7 -1 29.1557 3.64979 14
 -5 -7 -1 22.7808 2.7051 20
 5 7 1 29.9911 4.02114 1
 -6 -7 -1 -2.6615 2.13593 1
 -6 -7 -1 0.22631 2.23187 8
 -6 -7 -1 -1.1719 1.61937 20
 -6 -7 -1 -4.0332 3.8048 21
 -6 -7 -1 -1.4146 2.8328 14
 6 7 1 -1.2509 2.63823 1
 6 7 1 -2.1233 2.17512 1
 6 7 1 1.77393 2.81651 24
 -7 -7 -1 -1.36 2.32291 20
 -7 -7 -1 -5.9026 2.62526 1
 -7 -7 -1 1.91429 3.65396 14
 7 7 1 0.22987 2.78466 24
 7 7 1 0.55025 3.00507 1
 7 7 1 0.77989 3.58105 5
 7 7 1 -7.2033 2.63925 1
 8 -8 -1 9.37901 3.61344 23
 8 -8 -1 17.0636 2.91159 1
 8 -8 -1 16.7759 3.58837 1
 8 -8 -1 13.8074 3.18495 20
 8 -8 -1 11.8296 3.88829 14
 -8 8 1 9.48899 3.38312 1
 -8 8 1 10.0904 2.93813 13
 -8 8 1 12.9135 3.00889 1
 -8 8 1 15.8485 3.79034 6
 -8 8 1 19.316 4.25883 21
 7 -8 -1 19.7194 3.02643 1
 7 -8 -1 17.74 3.12443 14
 7 -8 -1 17.6301 2.70119 20
 7 -8 -1 20.3155 3.0443 1
 7 -8 -1 16.0265 2.80022 4
 7 -8 -1 12.8056 3.51915 23
 -7 8 1 14.4882 3.06906 1
 -7 8 1 15.8606 2.61901 13
 -7 8 1 20.787 3.19035 1
 -7 8 1 20.0365 3.68846 21
 -7 8 1 20.2537 3.14411 6
 6 -8 -1 15.0229 2.95878 14
 6 -8 -1 16.5743 2.27971 20
 6 -8 -1 14.3051 2.59556 4
 6 -8 -1 15.8021 2.70651 1
 6 -8 -1 14.0689 2.87851 1
 6 -8 -1 14.8137 3.01408 23
 -6 8 1 16.5793 3.03306 1
 -6 8 1 12.2082 2.41909 6
 -6 8 1 15.1247 3.12605 21
 -6 8 1 13.6514 1.68399 17
 -6 8 1 12.2803 2.30886 13
 -6 8 1 15.9279 2.53814 1
 5 -8 -1 21.2251 2.33912 20
 5 -8 -1 23.0965 3.20424 23
 5 -8 -1 22.6843 3.00193 14
 5 -8 -1 18.0466 2.95871 1
 5 -8 -1 21.513 2.62826 1
 -5 8 1 28.2699 2.96854 1
 -5 8 1 26.9001 3.60021 1
 -5 8 1 26.4477 3.11262 21
 -5 8 1 23.6881 3.11367 13
 -5 8 1 21.0939 2.33162 17
 4 -8 -1 119.132 4.6891 13
 4 -8 -1 114.644 4.35955 20
 4 -8 -1 128.385 5.36161 1
 4 -8 -1 126.175 5.36979 1
 4 -8 -1 118.602 3.58994 19
 4 -8 -1 120.391 5.51123 23
 -4 8 1 113.525 4.60603 23
 -4 8 1 123.514 5.38746 1
 -4 8 1 125.767 4.80544 13
 -4 8 1 124.737 4.32042 17
 -4 8 1 123.281 5.40007 21
 -4 8 1 124.911 5.01847 12
 -4 8 1 130.654 5.46768 1
 3 -8 -1 10.3475 1.86399 13
 3 -8 -1 12.0498 2.2667 1
 3 -8 -1 10.9739 1.59581 6
 3 -8 -1 10.4204 2.09229 1
 3 -8 -1 7.65189 2.37252 23
 3 -8 -1 13.6627 1.73838 20
 -3 8 1 11.1823 1.91223 24
 -3 8 1 12.1222 2.18355 21
 -3 8 1 14.1144 2.37785 1
 -3 8 1 11.4006 1.62401 23
 -3 8 1 11.1424 1.92898 13
 -3 8 1 10.9845 2.18366 1
 -3 8 1 10.8314 1.80826 12
 2 -8 -1 267.366 7.36624 6
 2 -8 -1 252.111 7.40797 20
 2 -8 -1 253.873 8.17734 23
 2 -8 -1 264.861 8.22581 1
 2 -8 -1 265.651 8.23362 1
 2 -8 -1 264.102 7.93279 21
 2 -8 -1 248.988 7.73584 13
 -2 8 1 258.532 8.29925 1
 -2 8 1 258.665 7.73778 23
 -2 8 1 253.245 7.40395 24
 -2 8 1 253.75 8.06334 21
 -2 8 1 265.332 7.36347 12
 -2 8 1 257.507 8.17973 1
 1 -8 -1 104.793 4.43944 13
 1 -8 -1 103.927 4.70505 23
 1 -8 -1 105.042 4.6228 1
 1 -8 -1 107.385 4.42074 21
 1 -8 -1 102.007 4.62724 1
 1 -8 -1 103.184 3.85756 20
 -1 8 1 103.043 3.86327 24
 -1 8 1 106.318 4.55951 21
 -1 8 1 105.136 4.67199 1
 -1 8 1 110.057 4.14955 23
 0 -8 -1 252.96 7.30909 20
 0 -8 -1 253.515 7.72572 21
 0 -8 -1 263.291 8.15732 1
 0 -8 -1 258.843 8.13168 23
 0 -8 -1 260.424 8.1135 1
 0 -8 -1 255.73 8.02445 13
 0 -8 -1 256.409 7.13199 12
 0 8 1 259.966 7.56983 2
 0 8 1 261.319 8.19065 1
 0 8 1 248.777 7.30415 24
 0 8 1 254.296 7.85697 21
 -1 -8 -1 129.215 5.11142 13
 -1 -8 -1 124.745 4.70419 21
 -1 -8 -1 114.523 4.09328 20
 -1 -8 -1 118.335 5.08025 23
 -1 -8 -1 115.875 4.72842 1
 -1 -8 -1 113.557 5.01228 1
 1 8 1 123.244 4.88486 21
 1 8 1 116.84 5.17389 1
 1 8 1 120.766 4.22828 2
 1 8 1 114.289 4.17227 24
 -2 -8 -1 0.58119 1.83237 1
 -2 -8 -1 -0.3799 1.57024 21
 -2 -8 -1 1.2734 1.01077 11
 -2 -8 -1 0.66692 1.51227 20
 -2 -8 -1 0.60652 2.10067 23
 2 8 1 2.27599 1.82123 21
 2 8 1 0.83387 1.47721 1
 2 8 1 2.51762 1.4505 24
 -3 -8 -1 12.2876 2.29912 21
 -3 -8 -1 13.9533 2.55828 1
 -3 -8 -1 11.1266 2.03137 20
 3 8 1 12.1668 2.59048 1
 3 8 1 14.7023 2.09317 24
 3 8 1 11.9489 2.09317 9
 3 8 1 14.5958 2.22702 15
 3 8 1 15.6244 2.34809 21
 -4 -8 -1 61.3846 3.24314 2
 -4 -8 -1 56.7018 4.31091 1
 -4 -8 -1 60.4263 3.51537 20
 -4 -8 -1 65.9261 4.58073 14
 -4 -8 -1 63.9833 4.63906 21
 4 8 1 62.6328 3.50936 24
 4 8 1 70.9525 4.68225 1
 4 8 1 70.2218 3.95289 15
 4 8 1 63.8058 3.80995 9
 -5 -8 -1 1.83199 1.84067 2
 -5 -8 -1 2.46474 3.41648 21
 -5 -8 -1 2.12826 2.72364 14
 -5 -8 -1 -0.1445 1.96529 20
 -5 -8 -1 -3.7276 2.11299 1
 5 8 1 3.38895 2.63155 24
 5 8 1 0.36532 2.46694 1
 -6 -8 -1 0.34318 2.21038 2
 -6 -8 -1 1.68911 2.45283 1
 -6 -8 -1 1.255 2.64224 8
 -6 -8 -1 -0.4753 3.32317 14
 -6 -8 -1 -1.144 2.16106 20
 6 8 1 6.09553 2.89468 1
 6 8 1 5.51015 2.94616 24
 -7 -8 -1 6.68065 2.96683 2
 -7 -8 -1 -1.7605 2.96661 20
 -7 -8 -1 7.46245 3.14797 8
 -7 -8 -1 6.2876 3.94586 14
 -7 -8 -1 3.3676 3.01725 1
 7 8 1 7.89568 3.25992 24
 7 8 1 5.138 2.88061 1
 7 8 1 2.43013 4.07206 5
 7 8 1 4.49593 3.3416 1
 8 -9 -1 34.8074 4.7387 14
 8 -9 -1 52.4422 5.75319 23
 8 -9 -1 47.8792 5.38637 1
 8 -9 -1 28.2465 3.96762 1
 8 -9 -1 43.4059 4.69332 20
 -8 9 1 29.5698 3.70449 13
 -8 9 1 53.0689 6.17373 21
 -8 9 1 37.7327 5.14003 1
 7 -9 -1 2.66503 2.71311 14
 7 -9 -1 -1.5469 2.74689 4
 7 -9 -1 -3.2618 2.09226 1
 7 -9 -1 -0.3821 2.37613 1
 7 -9 -1 0.29266 3.16651 23
 -7 9 1 0.89129 2.5763 1
 -7 9 1 -2.6596 2.53164 13
 -7 9 1 -2.0818 2.01631 1
 -7 9 1 3.70791 3.16424 21
 6 -9 -1 27.065 3.96679 4
 6 -9 -1 24.2348 3.16801 1
 6 -9 -1 20.2166 3.29467 14
 6 -9 -1 24.1912 3.31577 1
 6 -9 -1 22.1149 2.8006 20
 6 -9 -1 18.5617 3.56636 23
 -6 9 1 20.9619 2.76223 13
 -6 9 1 24.4256 3.55818 21
 -6 9 1 25.2399 3.2709 1
 -6 9 1 21.3495 2.08632 17
 -6 9 1 34.2048 4.02109 1
 5 -9 -1 74.273 4.94691 14
 5 -9 -1 72.9576 4.1062 13
 5 -9 -1 83.1555 4.69624 1
 5 -9 -1 67.31 3.84735 20
 5 -9 -1 76.6091 4.76149 1
 5 -9 -1 65.1292 3.19749 19
 5 -9 -1 69.0735 5.00192 23
 -5 9 1 73.3636 3.63283 17
 -5 9 1 76.1681 4.33325 13
 -5 9 1 72.4569 4.80256 1
 -5 9 1 67.018 4.35719 21
 -5 9 1 71.3722 4.40343 12
 -5 9 1 75.9451 4.85089 1
 4 -9 -1 3.67385 1.97925 13
 4 -9 -1 9.5313 2.05431 20
 4 -9 -1 7.88994 2.55242 23
 4 -9 -1 8.22383 2.14374 1
 4 -9 -1 6.19001 1.19393 22
 4 -9 -1 6.2771 2.38345 1
 -4 9 1 6.58583 2.13555 13
 -4 9 1 6.74713 2.36248 1
 -4 9 1 10.6643 2.5921 21
 -4 9 1 9.7832 2.17659 12
 -4 9 1 8.43377 2.36467 1
 3 -9 -1 89.4154 4.4098 13
 3 -9 -1 91.0679 4.86897 23
 3 -9 -1 94.4062 3.72417 6
 3 -9 -1 80.7879 3.74073 20
 3 -9 -1 99.8885 4.81592 1
 3 -9 -1 87.3783 4.50248 1
 -3 9 1 89.3731 3.83283 24
 -3 9 1 78.8237 3.83732 23
 -3 9 1 86.7246 4.75309 1
 -3 9 1 83.8806 4.48019 1
 -3 9 1 87.3148 4.83923 21
 -3 9 1 87.2523 3.99099 12
 2 -9 -1 145.985 5.77105 1
 2 -9 -1 138.973 5.8055 23
 2 -9 -1 133.848 5.34602 21
 2 -9 -1 134.909 4.78207 6
 2 -9 -1 142.64 5.4541 1
 2 -9 -1 136.48 5.32448 13
 2 -9 -1 130.142 4.77909 20
 -2 9 1 139.217 4.85929 24
 -2 9 1 139.545 5.08405 23
 -2 9 1 136.888 5.63162 21
 -2 9 1 145.891 5.80838 1
 -2 9 1 143.86 5.55408 1
 1 -9 -1 34.9399 3.57318 23
 1 -9 -1 30.6766 3.2962 1
 1 -9 -1 31.6823 3.06815 21
 1 -9 -1 32.5297 2.41528 20
 1 -9 -1 33.5006 2.76499 1
 1 -9 -1 35.0744 3.44624 13
 -1 9 1 37.0778 2.59504 23
 -1 9 1 35.5575 3.42428 21
 -1 9 1 30.2798 2.50812 24
 -1 9 1 30.7466 3.35977 1
 0 -9 -1 235.089 7.70574 1
 0 -9 -1 220.759 7.5952 1
 0 -9 -1 219.098 7.20941 21
 0 -9 -1 224.324 6.8469 20
 0 -9 -1 224.881 6.49956 12
 0 -9 -1 221.995 7.54387 13
 0 -9 -1 223.483 7.46784 23
 0 9 1 224.145 7.00217 2
 0 9 1 217.786 7.34711 21
 0 9 1 222.79 6.78024 24
 0 9 1 237.567 7.7941 1
 -1 -9 -1 16.4014 2.05331 20
 -1 -9 -1 15.9503 2.56794 13
 -1 -9 -1 20.6242 2.4841 1
 -1 -9 -1 18.3134 2.53558 1
 -1 -9 -1 20.5411 2.37427 21
 -1 -9 -1 16.289 2.71269 23
 1 9 1 17.7032 2.5549 1
 1 9 1 16.2723 1.93476 2
 1 9 1 17.5584 2.49145 21
 1 9 1 23.283 2.32382 24
 -2 -9 -1 31.266 3.43288 21
 -2 -9 -1 36.0723 3.79361 23
 -2 -9 -1 31.5751 3.36544 1
 -2 -9 -1 29.7796 2.70509 20
 -2 -9 -1 29.5467 3.75218 13
 -2 -9 -1 38.3688 2.38339 11
 2 9 1 32.4052 3.58876 1
 2 9 1 36.7477 2.72274 24
 2 9 1 35.2945 3.74643 21
 -3 -9 -1 55.0727 3.06835 20
 -3 -9 -1 54.9763 4.30558 21
 -3 -9 -1 56.1081 4.61215 23
 -3 -9 -1 67.0371 4.29345 1
 3 9 1 57.9688 4.40391 1
 3 9 1 55.9511 4.12286 21
 3 9 1 54.6573 4.12233 15
 3 9 1 55.2987 3.37039 24
 3 9 1 59.8595 4.14926 9
 -4 -9 -1 14.8029 2.37985 20
 -4 -9 -1 17.261 2.51351 1
 -4 -9 -1 21.1424 3.03959 14
 -4 -9 -1 18.9317 3.49465 21
 4 9 1 22.1034 3.32023 1
 4 9 1 18.6063 2.62446 9
 4 9 1 18.5881 2.70963 15
 -5 -9 -1 42.4234 5.45575 14
 -5 -9 -1 43.9349 3.6025 20
 -5 -9 -1 30.1024 4.47242 21
 -5 -9 -1 42.7802 4.28652 1
 5 9 1 40.9879 4.08696 24
 5 9 1 42.8235 4.55083 1
 -6 -9 -1 32.2036 4.02917 20
 -6 -9 -1 40.1201 5.62901 8
 -6 -9 -1 38.4041 4.4871 1
 -6 -9 -1 37.8865 3.6829 2
 -6 -9 -1 38.5873 4.64963 14
 6 9 1 53.1241 5.06364 1
 6 9 1 30.326 3.83197 24
 7 -10 -1 8.51283 2.74398 1
 7 -10 -1 11.8824 3.44973 14
 7 -10 -1 9.32138 3.43882 4
 7 -10 -1 11.0635 3.28527 20
 7 -10 -1 8.94302 3.1098 1
 7 -10 -1 5.64277 3.38671 23
 -7 10 1 15.2819 3.17538 1
 -7 10 1 14.8799 3.87199 21
 -7 10 1 12.0314 3.15505 13
 -7 10 1 11.6672 3.32409 1
 6 -10 -1 34.262 3.84192 19
 6 -10 -1 38.6594 4.72129 4
 6 -10 -1 39.6669 4.98559 23
 6 -10 -1 45.8846 3.624 20
 6 -10 -1 39.0172 3.48262 7
 6 -10 -1 33.7981 3.78202 14
 6 -10 -1 44.1523 4.45552 1
 -6 10 1 44.7453 4.55764 13
 -6 10 1 38.1495 3.26777 17
 -6 10 1 45.0356 4.44447 1
 -6 10 1 37.0883 4.07598 21
 -6 10 1 36.1235 3.9744 12
 -6 10 1 33.222 4.20174 1
 5 -10 -1 7.43291 2.50791 1
 5 -10 -1 3.61524 2.63313 14
 5 -10 -1 5.78361 1.2875 7
 5 -10 -1 6.95572 2.0266 20
 5 -10 -1 4.79069 2.20322 1
 5 -10 -1 4.79099 2.32834 13
 5 -10 -1 5.66298 1.10645 19
 5 -10 -1 6.95116 3.17714 23
 -5 10 1 5.72069 2.48221 13
 -5 10 1 5.48823 2.61028 1
 -5 10 1 7.77073 2.5211 1
 -5 10 1 10.7555 2.52918 12
 -5 10 1 5.66434 2.94782 21
 -5 10 1 4.11916 2.11668 17
 4 -10 -1 88.9889 4.92934 1
 4 -10 -1 97.841 4.999 13
 4 -10 -1 96.4999 5.36039 1
 4 -10 -1 89.3799 4.21288 20
 4 -10 -1 92.4489 5.01845 23
 -4 10 1 95.6366 5.31479 1
 -4 10 1 97.5699 5.44167 21
 -4 10 1 100.569 5.35409 1
 -4 10 1 94.197 4.72998 12
 3 -10 -1 139.139 6.25129 23
 3 -10 -1 134.75 5.98766 1
 3 -10 -1 132.746 5.48696 13
 3 -10 -1 128.913 4.98937 20
 3 -10 -1 128.512 4.81788 6
 3 -10 -1 134.717 5.89535 1
 -3 10 1 137.084 6.09062 21
 -3 10 1 135.025 5.92361 1
 -3 10 1 133.054 5.03361 24
 -3 10 1 127.898 5.95883 1
 -3 10 1 136.466 5.06736 12
 2 -10 -1 12.7002 2.00495 20
 2 -10 -1 15.5207 2.37202 21
 2 -10 -1 13.1596 2.58604 1
 2 -10 -1 10.3382 2.40675 13
 2 -10 -1 14.1341 2.54358 1
 2 -10 -1 13.2972 2.74907 23
 -2 10 1 11.5769 2.57206 1
 -2 10 1 16.2817 2.0831 23
 -2 10 1 13.7256 2.68569 21
 -2 10 1 12.8602 2.60977 1
 -2 10 1 15.2341 2.23579 24
 1 -10 -1 215.761 7.51815 13
 1 -10 -1 211.176 6.79522 20
 1 -10 -1 221.026 7.84123 23
 1 -10 -1 214.458 7.30887 21
 1 -10 -1 215.406 6.10902 3
 1 -10 -1 220.979 7.6507 1
 1 -10 -1 227.105 7.8208 1
 -1 10 1 220.254 7.8449 1
 -1 10 1 212.204 7.05993 23
 -1 10 1 222.041 7.24822 2
 -1 10 1 216.027 7.52524 21
 -1 10 1 213.008 6.77337 24
 0 -10 -1 52.0701 4.14584 23
 0 -10 -1 48.5356 3.61484 21
 0 -10 -1 47.3696 3.97066 1
 0 -10 -1 47.0796 2.92906 12
 0 -10 -1 53.664 3.8821 1
 0 -10 -1 51.8833 3.17661 20
 0 -10 -1 53.7388 4.00049 13
 0 10 1 47.834 3.41315 2
 0 10 1 48.7603 3.93067 21
 0 10 1 46.9796 2.98634 24
 0 10 1 59.2185 4.25182 1
 -1 -10 -1 65.7149 4.05112 21
 -1 -10 -1 65.4468 4.35599 1
 -1 -10 -1 61.2105 3.8458 13
 -1 -10 -1 62.4705 4.17403 1
 -1 -10 -1 60.6676 3.42107 20
 -1 -10 -1 60.7619 3.39495 12
 -1 -10 -1 66.8816 4.68798 23
 1 10 1 60.9014 3.47783 2
 1 10 1 65.6414 4.34222 21
 1 10 1 60.2677 4.43288 1
 1 10 1 62.7911 3.39061 24
 -2 -10 -1 121.869 5.66902 1
 -2 -10 -1 119.084 4.27589 11
 -2 -10 -1 116.415 5.68923 13
 -2 -10 -1 114.778 5.47854 1
 -2 -10 -1 117.636 5.8643 21
 -2 -10 -1 120.255 5.89839 23
 -2 -10 -1 107.026 4.70656 20
 2 10 1 117.783 5.46885 21
 2 10 1 115.949 4.656 24
 2 10 1 110.21 5.74539 1
 -3 -10 -1 1.75719 2.23485 1
 -3 -10 -1 1.58689 2.53085 13
 -3 -10 -1 3.10755 2.80543 23
 -3 -10 -1 1.10228 1.82356 20
 -3 -10 -1 1.74558 2.87128 21
 3 10 1 -0.2114 2.36042 1
 3 10 1 1.58059 2.55243 15
 3 10 1 2.53592 2.49337 21
 3 10 1 -1.5345 2.17599 9
 -4 -10 -1 61.3477 4.57522 1
 -4 -10 -1 62.7515 5.4208 14
 -4 -10 -1 60.2456 3.92183 20
 -4 -10 -1 58.9514 5.36545 23
 -4 -10 -1 62.5612 6.10212 21
 4 10 1 69.4777 5.07439 15
 4 10 1 52.765 4.82011 1
 4 10 1 52.9435 2.38453 3
 4 10 1 60.4126 4.41465 24
 4 10 1 67.7675 4.65459 9
 -5 -10 -1 55.4139 6.10041 14
 -5 -10 -1 51.323 4.69965 20
 -5 -10 -1 47.515 4.61317 1
 5 10 1 57.6844 4.92341 1
 5 10 1 47.7669 4.47935 24
 -6 -10 -1 2.148 3.41371 20
 -6 -10 -1 -5.8435 3.91355 8
 -6 -10 -1 5.58225 4.28943 14
 -6 -10 -1 -3.9041 3.20186 1
 6 10 1 3.41157 3.34565 24
 6 10 1 7.5905 3.46257 1
 7 -11 -1 7.40977 3.76221 4
 7 -11 -1 2.64546 3.27397 20
 7 -11 -1 9.31837 3.38984 14
 7 -11 -1 4.60422 2.64195 7
 7 -11 -1 5.46848 3.52198 23
 7 -11 -1 5.25414 2.90649 1
 7 -11 -1 9.60664 3.43961 1
 -7 11 1 6.33757 3.47547 13
 -7 11 1 2.57273 3.53916 1
 -7 11 1 9.1744 4.2484 12
 -7 11 1 5.54505 3.22171 1
 -7 11 1 2.71015 3.47842 21
 6 -11 -1 -4.4145 2.11959 1
 6 -11 -1 0.21676 1.17138 19
 6 -11 -1 -1.4175 3.34851 23
 6 -11 -1 0.14514 2.68753 1
 6 -11 -1 1.60015 1.58234 7
 6 -11 -1 3.42139 3.03245 14
 6 -11 -1 -0.0478 1.37217 19
 -6 11 1 1.25906 3.06951 12
 -6 11 1 1.82098 2.96161 21
 -6 11 1 2.3327 2.71932 1
 -6 11 1 3.08681 2.72781 1
 -6 11 1 -0.4441 2.15774 17
 5 -11 -1 11.9285 2.28806 20
 5 -11 -1 12.636 2.57647 1
 5 -11 -1 13.3352 2.99464 1
 5 -11 -1 14.5184 2.94171 13
 5 -11 -1 7.75706 2.85265 14
 5 -11 -1 10.2049 3.39985 23
 -5 11 1 18.6219 3.01104 1
 -5 11 1 9.09206 3.15759 21
 -5 11 1 14.8248 3.00744 12
 -5 11 1 18.936 2.78857 1
 -5 11 1 10.5454 2.5455 17
 4 -11 -1 23.5847 3.80035 23
 4 -11 -1 24.8779 3.19036 1
 4 -11 -1 26.8107 3.24353 1
 4 -11 -1 26.7502 2.84972 20
 4 -11 -1 26.8139 3.23995 13
 -4 11 1 29.6717 3.65593 21
 -4 11 1 28.5323 3.27339 1
 -4 11 1 28.1598 3.40172 1
 -4 11 1 27.0519 3.03226 12
 3 -11 -1 20.324 2.92384 1
 3 -11 -1 16.4867 2.25758 6
 3 -11 -1 16.5626 2.97457 1
 3 -11 -1 18.9163 2.35414 20
 3 -11 -1 18.9365 2.9842 13
 3 -11 -1 17.9459 3.33884 23
 -3 11 1 18.3503 3.12015 1
 -3 11 1 19.4996 3.16707 21
 -3 11 1 17.3706 2.9767 1
 -3 11 1 14.7516 2.46797 24
 2 -11 -1 136.452 5.93894 13
 2 -11 -1 120.941 5.72638 1
 2 -11 -1 127.233 5.06201 20
 2 -11 -1 135.16 6.1174 1
 2 -11 -1 137.238 6.31111 23
 2 -11 -1 129.318 5.62933 21
 -2 11 1 138.452 6.27115 1
 -2 11 1 140.47 6.10866 21
 -2 11 1 131.878 5.1699 24
 1 -11 -1 70.233 4.38523 21
 1 -11 -1 81.1731 4.806 13
 1 -11 -1 78.0034 4.65516 1
 1 -11 -1 70.609 3.78098 20
 1 -11 -1 75.7149 4.63983 1
 1 -11 -1 73.6264 3.02491 3
 1 -11 -1 69.9603 4.93099 23
 -1 11 1 74.2431 3.79077 24
 -1 11 1 85.4442 4.92898 21
 -1 11 1 84.1553 4.65762 2
 -1 11 1 63.5853 4.47434 1
 0 -11 -1 107.57 5.49692 1
 0 -11 -1 108.641 5.17347 21
 0 -11 -1 95.9495 4.11312 12
 0 -11 -1 98.4896 4.44474 20
 0 -11 -1 98.9374 5.19462 1
 0 -11 -1 114.704 5.83092 23
 0 -11 -1 103.587 4.94085 13
 0 11 1 101.186 4.35827 24
 0 11 1 103.482 5.32507 21
 0 11 1 103.204 5.55843 1
 0 11 1 107.504 4.84903 2
 -1 -11 -1 102.767 5.33855 1
 -1 -11 -1 102.167 5.651 23
 -1 -11 -1 98.3442 5.36253 21
 -1 -11 -1 106.369 5.35223 1
 -1 -11 -1 98.6557 5.45884 13
 -1 -11 -1 96.2873 4.22208 12
 -1 -11 -1 88.1187 4.27955 20
 1 11 1 86.4193 5.16624 21
 1 11 1 103.641 5.54296 1
 1 11 1 94.8116 4.31806 24
 -2 -11 -1 0.22911 1.82513 20
 -2 -11 -1 -1.4242 2.88601 21
 -2 -11 -1 3.1948 2.24307 1
 -2 -11 -1 -3.7222 1.88029 1
 -2 -11 -1 -1.5716 2.75966 23
 -2 -11 -1 -0.078 1.72932 11
 -2 -11 -1 -0.8969 2.28523 13
 2 11 1 1.46155 2.55618 21
 2 11 1 1.85181 2.26952 1
 -3 -11 -1 26.7764 4.25338 21
 -3 -11 -1 27.5783 3.09487 20
 -3 -11 -1 41.2095 4.83887 23
 -3 -11 -1 35.1944 3.82114 1
 -3 -11 -1 35.8338 3.75913 13
 3 11 1 34.5716 4.69666 9
 3 11 1 39.5852 3.9575 24
 3 11 1 32.9354 4.17779 1
 3 11 1 32.1203 3.48976 21
 3 11 1 35.5448 4.94035 15
 -4 -11 -1 10.8855 3.10235 13
 -4 -11 -1 10.3111 3.65497 23
 -4 -11 -1 4.89809 3.24559 14
 4 11 1 8.77713 3.01594 1
 4 11 1 13.2577 3.30129 15
 4 11 1 11.1662 3.15593 9
 4 11 1 17.2746 3.24123 24
 -5 -11 -1 -1.371 3.41003 23
 -5 -11 -1 0.13101 3.02718 20
 -5 -11 -1 -4.2795 3.10846 13
 -5 -11 -1 7.50741 3.73142 14
 -5 -11 -1 -7.6009 2.9057 1
 5 11 1 -0.101 1.42847 3
 5 11 1 -1.2349 3.08179 24
 5 11 1 -4.6624 3.09004 1
 6 -12 -1 11.6656 3.02441 20
 6 -12 -1 13.3347 3.46424 1
 6 -12 -1 12.0487 2.80259 1
 6 -12 -1 10.5691 3.95265 23
 6 -12 -1 14.4633 3.32838 14
 -6 12 1 19.1834 3.44689 1
 -6 12 1 13.2486 2.72007 17
 -6 12 1 16.1294 3.98279 21
 -6 12 1 14.3534 3.98005 12
 -6 12 1 11.6649 3.5801 1
 5 -12 -1 15.901 3.35157 13
 5 -12 -1 6.36789 2.74411 14
 5 -12 -1 10.015 2.68651 1
 5 -12 -1 14.567 3.22206 1
 5 -12 -1 9.429 3.58757 23
 -5 12 1 12.5311 2.96654 17
 -5 12 1 17.4888 3.33772 12
 -5 12 1 12.8083 2.71106 1
 -5 12 1 11.5568 3.18539 21
 -5 12 1 11.2835 3.0703 1
 4 -12 -1 6.36892 2.84299 1
 4 -12 -1 11.3905 2.54231 1
 4 -12 -1 4.37961 3.23135 23
 4 -12 -1 1.92058 1.86604 20
 4 -12 -1 6.88408 2.7833 13
 -4 12 1 7.85023 2.60458 12
 -4 12 1 7.26267 2.78749 1
 -4 12 1 7.66077 2.72287 1
 -4 12 1 11.0222 3.22559 21
 -4 12 1 0.34891 2.74491 24
 3 -12 -1 6.23971 2.25053 1
 3 -12 -1 5.79047 2.60462 1
 3 -12 -1 -0.9569 1.64285 20
 3 -12 -1 2.25335 2.78499 13
 3 -12 -1 5.50676 3.22539 23
 3 -12 -1 7.54741 2.18872 6
 -3 12 1 1.70493 2.73277 21
 -3 12 1 4.71944 2.46195 1
 -3 12 1 8.64291 2.59106 1
 2 -12 -1 1.65776 2.8879 23
 2 -12 -1 1.90045 1.8724 20
 2 -12 -1 6.58837 2.19523 1
 2 -12 -1 4.63306 2.60558 13
 2 -12 -1 5.12276 2.26159 1
 -2 12 1 0.80133 2.50491 21
 -2 12 1 2.10649 2.45186 1
 1 -12 -1 -0.7727 1.72798 20
 1 -12 -1 -4.3544 2.23511 13
 1 -12 -1 0.04477 1.89564 1
 1 -12 -1 -1.6506 2.22936 21
 1 -12 -1 -0.5788 2.54594 23
 1 -12 -1 -2.804 2.1515 1
 1 -12 -1 -0.1063 1.03903 3
 -1 12 1 -3.3225 1.65208 24
 -1 12 1 2.6134 2.40441 2
 -1 12 1 0.12829 2.53923 21
 0 -12 -1 35.6993 2.65432 20
 0 -12 -1 40.3724 4.01598 1
 0 -12 -1 37.8134 3.73879 1
 0 -12 -1 35.2162 3.0756 12
 0 -12 -1 32.4326 3.72804 21
 0 -12 -1 41.717 4.58797 23
 0 -12 -1 36.1032 4.12427 13
 0 12 1 46.0474 3.96142 2
 0 12 1 36.2862 4.35178 21
 0 12 1 35.29 4.10344 1
 0 12 1 37.1203 2.07459 19
 -1 -12 -1 4.08959 2.69523 23
 -1 -12 -1 -0.1993 2.13493 1
 -1 -12 -1 3.05627 1.98345 12
 -1 -12 -1 -0.34 2.46574 13
 -1 -12 -1 -0.3338 2.08564 1
 -1 -12 -1 2.04498 1.99942 20
 -1 -12 -1 4.03239 3.28047 21
 1 12 1 -0.0799 2.13674 1
 1 12 1 -4.5011 2.46585 21
 -2 -12 -1 10.875 2.67859 1
 -2 -12 -1 8.21827 3.10128 23
 -2 -12 -1 5.06813 2.29295 20
 -2 -12 -1 1.14024 2.56894 13
 -2 -12 -1 8.18875 2.11971 11
 -2 -12 -1 2.46771 2.38938 1
 2 12 1 14.2828 2.98629 1
 2 12 1 7.86222 2.93725 24
 2 12 1 8.72446 2.8639 21
 -3 -12 -1 0.63295 2.87567 13
 -3 -12 -1 8.80131 3.52144 23
 -3 -12 -1 8.25203 2.60937 1
 -3 -12 -1 15.6694 2.45166 1
 3 12 1 6.26252 3.43557 15
 3 12 1 13.861 3.01882 1
 3 12 1 5.73161 3.27041 9
 3 12 1 9.29388 3.09675 21
 3 12 1 12.8157 2.839 24
 -4 -12 -1 4.48708 3.40405 23
 -4 -12 -1 -5.0927 2.64957 20
 -4 -12 -1 -2.7136 3.39573 14
 -4 -12 -1 -7.6932 2.99639 13
 4 12 1 1.89738 2.66724 24
 4 12 1 -0.0047 3.43418 9
 4 12 1 -1.4168 3.53823 15
 4 12 1 -4.5091 2.21546 1
 6 -13 -1 3.08187 3.03791 20
 6 -13 -1 -0.6397 3.4446 23
 6 -13 -1 7.40031 3.25206 14
 6 -13 -1 -0.3626 3.07161 1
 6 -13 -1 -3.5844 3.47473 1
 -6 13 1 6.80788 3.45913 21
 -6 13 1 1.93623 3.69167 1
 -6 13 1 2.96769 3.903 12
 -6 13 1 7.66749 3.536 1
 -6 13 1 6.44723 3.45142 17
 5 -13 -1 2.05649 2.79483 1
 5 -13 -1 2.68492 3.73137 13
 5 -13 -1 2.13539 2.49249 1
 5 -13 -1 -2.8394 2.56671 20
 -5 13 1 2.06779 2.71319 1
 -5 13 1 -4.4852 2.86775 17
 -5 13 1 0.50549 3.18172 12
 -5 13 1 -6.4732 3.4652 21
 -5 13 1 1.47315 2.68544 1
 4 -13 -1 4.76392 2.67613 1
 4 -13 -1 7.14082 3.44722 13
 4 -13 -1 10.0995 2.96027 1
 4 -13 -1 0.56402 3.53151 23
 -4 13 1 6.61925 3.06722 1
 -4 13 1 9.62831 3.21466 1
 -4 13 1 5.90123 3.2031 21
 -4 13 1 2.59475 3.08491 24
 3 -13 -1 4.58817 2.16968 20
 3 -13 -1 4.21245 2.40525 6
 3 -13 -1 3.27728 2.46653 1
 3 -13 -1 -0.3601 3.01276 13
 3 -13 -1 1.22846 2.54377 1
 3 -13 -1 2.74817 3.30652 23
 -3 13 1 6.18745 2.8852 21
 -3 13 1 -1.5086 2.58208 1
 -3 13 1 4.60502 2.96569 24
 -3 13 1 1.48344 2.58551 1
 2 -13 -1 1.80955 2.43227 6
 2 -13 -1 -1.4316 1.92187 1
 2 -13 -1 -4.489 2.83184 23
 2 -13 -1 1.58317 1.96005 3
 2 -13 -1 -4.5705 1.75092 20
 2 -13 -1 0.66735 2.20898 1
 2 -13 -1 -3.0626 2.69994 13
 -2 13 1 2.05312 2.82876 21
 -2 13 1 -1.9269 2.69895 24
 -2 13 1 -0.5909 2.66152 2
 -2 13 1 -0.154 2.52247 1
 1 -13 -1 1.99337 1.82153 20
 1 -13 -1 1.74196 2.48962 1
 1 -13 -1 0.58652 2.94565 23
 1 -13 -1 0.79512 1.99174 1
 1 -13 -1 0.21306 2.71396 13
 -1 13 1 -1.418 2.60708 21
 -1 13 1 1.19587 2.66525 24
 -1 13 1 2.90701 2.69784 2
 -1 13 1 -2.8145 2.26448 1
 0 -13 -1 2.15803 2.19862 1
 0 -13 -1 6.22269 2.57896 1
 0 -13 -1 7.0728 2.12076 20
 0 -13 -1 2.90411 2.98774 23
 0 -13 -1 4.45372 2.8264 13
 0 13 1 3.89251 2.81845 21
 0 13 1 6.29096 1.26061 19
 0 13 1 4.5015 2.70357 1
 0 13 1 6.56834 2.62353 2
 0 13 1 6.74602 1.08191 19
 0 13 1 5.0747 2.83912 24
 -1 -13 -1 2.22361 1.95334 1
 -1 -13 -1 -3.73 2.57027 13
 -1 -13 -1 -0.2196 2.31138 1
 -1 -13 -1 1.15668 2.1243 12
 -1 -13 -1 2.2946 2.98675 23
 -1 -13 -1 -1.4947 1.79642 20
 1 13 1 -4.1957 2.72114 21
 1 13 1 0.82388 2.56268 24
 1 13 1 6.4874 2.44515 1
 -2 -13 -1 31.2264 4.07785 12
 -2 -13 -1 38.3209 3.9006 11
 -2 -13 -1 26.6694 3.36684 1
 -2 -13 -1 36.4122 4.49734 23
 -2 -13 -1 28.9301 3.60213 1
 -2 -13 -1 29.0415 3.56522 13
 2 13 1 30.1204 3.78898 21
 2 13 1 31.8435 3.7414 1
 2 13 1 24.1563 3.48147 24
 -3 -13 -1 1.59205 3.4041 23
 -3 -13 -1 6.85127 3.31772 20
 -3 -13 -1 0.27817 2.6428 1
 -3 -13 -1 -6.0407 2.70444 13
 -3 -13 -1 -2.9591 2.89749 1
 3 13 1 -1.7266 4.02876 15
 3 13 1 -1.1452 3.16566 21
 3 13 1 -3.2214 3.53215 9
 3 13 1 1.83877 3.06933 1
 3 13 1 1.27701 3.14105 24
 -4 -13 -1 8.2207 3.8229 23
 -4 -13 -1 2.04037 4.5107 14
 -4 -13 -1 -6.8514 2.96672 13
 -4 -13 -1 -0.8201 3.21202 1
 4 13 1 1.03805 3.5118 1
 4 13 1 2.69388 4.18297 9
 5 -14 -1 -1.4533 3.20662 1
 5 -14 -1 -3.4786 3.85419 23
 5 -14 -1 2.42736 3.01775 20
 5 -14 -1 -6.5779 3.02278 14
 5 -14 -1 0.57006 4.16344 13
 5 -14 -1 -5.9809 3.36982 1
 -5 14 1 -0.0309 3.42689 1
 -5 14 1 -0.9909 3.55639 12
 -5 14 1 5.78957 3.51823 1
 -5 14 1 -0.5906 3.53894 17
 -5 14 1 1.23279 3.25281 21
 4 -14 -1 17.3281 3.1877 1
 4 -14 -1 12.552 3.14588 1
 4 -14 -1 12.1015 4.11627 13
 4 -14 -1 10.7981 3.23541 20
 4 -14 -1 3.04643 3.82571 23
 -4 14 1 8.94923 3.21812 1
 -4 14 1 8.33822 3.36294 24
 -4 14 1 11.2919 3.62412 21
 -4 14 1 9.3549 3.27916 1
 3 -14 -1 9.58868 3.90609 23
 3 -14 -1 6.89584 3.72088 13
 3 -14 -1 9.83394 2.85171 1
 3 -14 -1 3.81624 2.97244 20
 3 -14 -1 5.18555 2.7079 6
 3 -14 -1 2.08398 2.87615 1
 -3 14 1 2.92049 3.19932 24
 -3 14 1 4.59019 3.00748 1
 -3 14 1 8.68712 3.06422 21
 2 -14 -1 15.0815 3.9317 13
 2 -14 -1 14.4158 3.07203 6
 2 -14 -1 22.1327 3.03486 1
 2 -14 -1 15.7408 3.86179 23
 2 -14 -1 11.5137 2.17837 3
 2 -14 -1 17.4657 3.00731 1
 -2 14 1 8.69314 3.58689 2
 -2 14 1 9.23878 3.28738 1
 -2 14 1 9.3428 3.36513 24
 -2 14 1 9.32825 3.26987 21
 1 -14 -1 11.139 2.83797 1
 1 -14 -1 12.7001 2.63315 1
 1 -14 -1 8.20267 3.34133 23
 1 -14 -1 14.8856 3.70462 13
 -1 14 1 9.9364 3.13775 24
 -1 14 1 8.16887 3.26413 21
 -1 14 1 12.4084 3.33226 2
 -1 14 1 10.8466 3.07187 1
 0 -14 -1 14.6881 3.59229 23
 0 -14 -1 4.50015 2.92444 1
 0 -14 -1 7.79023 2.57716 1
 0 -14 -1 11.8897 3.41509 13
 0 14 1 12.6732 3.19598 24
 0 14 1 3.83982 2.79468 1
 0 14 1 8.60092 3.08027 21
 0 14 1 5.33542 2.94893 2
 -1 -14 -1 2.72437 2.76943 13
 -1 -14 -1 8.57641 2.66691 1
 -1 -14 -1 10.3316 3.09742 1
 -1 -14 -1 9.08049 3.59665 23
 -1 -14 -1 2.28207 3.09579 20
 -1 -14 -1 5.06132 2.40821 12
 1 14 1 14.9188 3.0492 1
 1 14 1 0.11755 3.18514 21
 1 14 1 11.8585 3.116 24
 -2 -14 -1 4.10589 2.80269 12
 -2 -14 -1 6.75094 3.72315 23
 -2 -14 -1 8.00647 3.20383 1
 -2 -14 -1 7.68031 3.19556 20
 -2 -14 -1 12.3607 3.4357 13
 -2 -14 -1 8.84327 2.91638 11
 -2 -14 -1 4.48292 2.60553 1
 2 14 1 9.27655 3.46588 21
 2 14 1 10.1473 3.45422 24
 2 14 1 10.7525 4.39405 9
 2 14 1 8.82671 3.3124 1
 -3 -14 -1 -2.1891 3.08369 1
 -3 -14 -1 0.34001 3.951 23
 -3 -14 -1 -4.5019 3.13488 13
 4 -15 -1 1.70438 4.56889 13
 4 -15 -1 1.60117 3.22009 1
 -4 15 1 6.71715 3.43257 1
 -4 15 1 -3.5912 2.97764 21
 -4 15 1 -1.6575 3.37358 1
 3 -15 -1 15.1819 4.12658 23
 3 -15 -1 14.9685 3.41092 6
 3 -15 -1 12.1407 4.68897 13
 3 -15 -1 6.83369 3.52569 1
 3 -15 -1 12.5685 3.25624 1
 3 -15 -1 16.9344 3.4777 20
 3 -15 -1 16.6265 3.41341 3
 -3 15 1 9.33974 4.19331 2
 -3 15 1 6.34025 3.52086 24
 -3 15 1 12.8759 3.81231 21
 -3 15 1 18.3441 3.84258 1
 2 -15 -1 8.54661 4.20156 13
 2 -15 -1 6.55033 3.42935 6
 2 -15 -1 8.24896 2.93587 1
 2 -15 -1 10.4796 2.96926 1
 2 -15 -1 6.01292 3.65684 23
 2 -15 -1 7.26107 1.92413 3
 2 -15 -1 1.93605 3.00771 20
 -2 15 1 6.56051 3.27251 24
 -2 15 1 7.27891 3.42922 1
 -2 15 1 6.25778 3.39685 21
 -2 15 1 7.59567 3.9635 2
 1 -15 -1 -4.8619 2.03441 1
 1 -15 -1 -2.2058 3.44076 23
 1 -15 -1 2.24001 3.6772 13
 1 -15 -1 -1.4026 2.85241 20
 1 -15 -1 0.00604 2.84015 1
 -1 15 1 2.92638 3.00079 1
 -1 15 1 2.36813 3.23546 24
 -1 15 1 4.0905 3.50365 2
 -1 15 1 -1.0879 3.19688 21
 0 -15 -1 16.2661 3.28408 1
 0 -15 -1 21.1499 4.11035 23
 0 -15 -1 10.735 4.0269 13
 0 -15 -1 9.32392 3.45736 20
 0 -15 -1 13.7675 3.14536 1
 0 15 1 16.6658 3.5713 1
 0 15 1 8.50823 3.58113 2
 0 15 1 14.7977 3.87931 21
 0 15 1 19.3197 3.68137 24
 -1 -15 -1 3.97105 3.02482 20
 -1 -15 -1 4.84534 3.51075 13
 -1 -15 -1 10.752 3.39372 1
 -1 -15 -1 10.1852 4.05319 23
 1 15 1 7.73361 2.33082 19
 1 15 1 11.9114 3.47846 24
 1 15 1 9.02185 3.6247 21
 1 15 1 12.376 3.39375 1
 0 16 -2 15.3265 3.39485 2
 0 16 -2 11.7595 2.27078 7
 0 16 -2 13.2551 3.83106 21
 0 -16 2 18.4114 3.86749 23
 0 -16 2 12.1804 3.22923 1
 0 -16 2 12.9935 3.37527 1
 0 -16 2 10.6902 3.68093 13
 -1 16 -2 4.84727 3.24432 1
 -1 16 -2 1.09204 3.6554 2
 -1 16 -2 4.02828 3.3907 24
 -1 16 -2 4.76831 3.56634 21
 1 -16 2 -3.9816 3.2893 23
 1 -16 2 -5.7743 3.85592 13
 1 -16 2 10.2429 3.11295 1
 1 -16 2 2.71857 3.08835 1
 1 -16 2 -2.1958 3.05463 20
 -2 16 -2 9.79735 3.85828 21
 -2 16 -2 -5.7344 3.1252 1
 2 -16 2 5.44666 3.31985 3
 2 -16 2 4.80398 3.20893 1
 2 -16 2 0.7777 2.36256 6
 2 -16 2 1.20549 3.24623 20
 2 -16 2 3.08758 2.74088 1
 2 -16 2 7.59012 4.54636 13
 2 -16 2 -0.5457 3.6124 23
 2 15 -2 -1.5028 3.17448 21
 2 15 -2 1.00576 3.07411 24
 2 15 -2 1.27751 3.20347 1
 -2 -15 2 2.46556 3.49475 20
 -2 -15 2 -4.3106 2.9547 1
 -2 -15 2 -1.1144 3.18639 13
 -2 -15 2 -1.0531 3.10177 1
 -2 -15 2 -4.6474 3.72577 11
 -2 -15 2 -1.687 3.48266 23
 1 15 -2 18.6439 3.50833 24
 1 15 -2 14.7897 3.60035 21
 1 15 -2 22.3498 3.44624 1
 -1 -15 2 19.7136 3.21682 1
 -1 -15 2 20.731 3.63016 13
 -1 -15 2 22.1539 4.23749 23
 -1 -15 2 13.3848 3.46087 20
 -1 -15 2 14.9196 3.11694 1
 -1 -15 2 22.8397 4.35852 11
 0 15 -2 4.88022 2.22933 7
 0 15 -2 6.80098 2.80101 2
 0 15 -2 7.22857 3.2528 21
 0 15 -2 5.69826 2.50225 1
 0 15 -2 3.09328 3.02012 24
 0 -15 2 3.24947 3.26893 20
 0 -15 2 7.34885 3.48892 23
 0 -15 2 6.10298 2.23756 1
 0 -15 2 2.88162 3.22922 13
 0 -15 2 4.44825 2.64318 1
 -1 15 -2 -1.9994 2.7854 1
 -1 15 -2 2.57231 3.14069 2
 -1 15 -2 6.374 3.0265 24
 -1 15 -2 1.363 3.11921 21
 1 -15 2 -2.416 3.32269 23
 1 -15 2 -1.5758 2.8226 20
 1 -15 2 0.57536 2.80602 1
 1 -15 2 5.27156 2.57081 1
 1 -15 2 2.17157 3.00754 13
 -2 15 -2 13.769 3.4647 24
 -2 15 -2 15.3578 3.66356 21
 -2 15 -2 12.0278 3.29194 1
 2 -15 2 12.049 3.31338 20
 2 -15 2 14.7523 3.29267 3
 2 -15 2 22.3386 3.47456 1
 2 -15 2 15.5442 3.91685 13
 2 -15 2 13.4567 2.26789 6
 2 -15 2 16.087 3.05784 1
 2 -15 2 12.3608 3.58801 23
 -3 15 -2 -1.6387 3.17906 21
 -3 15 -2 -1.2984 3.09839 24
 -3 15 -2 -1.4255 2.91762 1
 3 -15 2 -4.1187 2.90143 20
 3 -15 2 2.50733 2.81102 1
 3 -15 2 6.15395 2.98469 1
 3 -15 2 0.73709 3.58284 3
 3 -15 2 -7.937 3.39705 23
 3 -15 2 -2.8594 3.94521 13
 -4 15 -2 -0.3476 3.34936 24
 -4 15 -2 -4.6442 3.11076 1
 -4 15 -2 -1.9099 3.52955 21
 -4 15 -2 9.45915 3.05097 1
 4 -15 2 0.19736 3.59317 14
 4 -15 2 -0.7049 3.61444 23
 4 -15 2 5.06685 3.04478 1
 4 -15 2 -0.662 3.31844 1
 4 -15 2 3.43765 2.9175 22
 4 -15 2 6.61683 4.60765 13
 4 -15 2 4.96033 3.36682 20
 3 14 -2 1.8556 3.50857 21
 3 14 -2 0.8722 3.20929 24
 3 14 -2 4.35487 3.18332 1
 -3 -14 2 0.83266 2.11434 12
 -3 -14 2 0.25778 2.59134 20
 -3 -14 2 -3.1845 2.89945 1
 -3 -14 2 -2.962 2.97259 1
 -3 -14 2 3.15569 3.59929 23
 -3 -14 2 8.16626 3.0676 13
 2 14 -2 10.2458 3.40005 21
 2 14 -2 17.6973 2.87784 1
 2 14 -2 9.24681 3.17637 24
 -2 -14 2 11.6695 3.34987 20
 -2 -14 2 11.0094 2.54189 1
 -2 -14 2 14.7836 3.06133 13
 -2 -14 2 19.0068 3.96788 23
 -2 -14 2 11.972 2.87327 1
 -2 -14 2 15.6389 3.65689 11
 1 14 -2 17.3764 3.38957 21
 1 14 -2 21.2349 3.46322 24
 1 14 -2 31.7588 4.23097 1
 -1 -14 2 18.8471 3.93076 23
 -1 -14 2 22.4703 3.51751 13
 -1 -14 2 16.8489 3.15293 1
 -1 -14 2 22.0757 3.92999 11
 -1 -14 2 20.1276 3.21059 1
 0 14 -2 1.48536 1.94808 7
 0 14 -2 3.02848 2.65149 24
 0 14 -2 6.22127 2.72222 1
 0 14 -2 -0.6834 2.88193 21
 0 14 -2 4.28547 2.49243 2
 0 -14 2 -0.8241 2.47459 1
 0 -14 2 0.26919 2.46125 1
 0 -14 2 6.38973 3.27512 23
 0 -14 2 1.47861 2.77239 13
 -1 14 -2 40.0173 4.19893 24
 -1 14 -2 47.0134 4.9536 21
 -1 14 -2 36.8525 4.43231 1
 1 -14 2 45.7538 4.9266 13
 1 -14 2 32.602 3.90067 1
 1 -14 2 39.7068 4.32485 23
 1 -14 2 45.2351 4.14728 1
 -2 14 -2 13.1456 3.43977 21
 -2 14 -2 9.60096 3.17577 1
 -2 14 -2 17.5121 3.49176 24
 2 -14 2 11.5478 3.65061 23
 2 -14 2 6.81633 3.39037 13
 2 -14 2 15.9265 2.89596 1
 2 -14 2 11.6208 1.98979 6
 2 -14 2 13.573 3.03748 1
 2 -14 2 16.6049 3.16205 3
 -3 14 -2 31.3008 4.26677 1
 -3 14 -2 29.3667 4.08101 21
 -3 14 -2 38.6117 4.72722 1
 -3 14 -2 36.5128 4.02656 24
 3 -14 2 30.3934 3.91067 20
 3 -14 2 32.1825 4.63409 23
 3 -14 2 39.8581 5.2946 3
 3 -14 2 43.7131 4.75569 1
 3 -14 2 44.4034 5.61387 13
 3 -14 2 42.3625 4.29865 1
 -4 14 -2 25.6859 4.14629 21
 -4 14 -2 37.1081 4.66165 1
 -4 14 -2 21.8203 4.31971 13
 -4 14 -2 20.9349 3.5963 24
 -4 14 -2 20.2706 3.26358 1
 4 -14 2 19.3864 3.92879 14
 4 -14 2 22.5586 3.31422 1
 4 -14 2 21.6646 4.27111 23
 4 -14 2 27.2445 2.9449 22
 4 -14 2 25.8675 3.49797 1
 4 -14 2 30.801 4.0567 20
 4 -14 2 32.5193 4.85378 13
 -5 14 -2 3.17002 1.98121 10
 -5 14 -2 -2.2997 3.26884 21
 -5 14 -2 9.59416 2.77802 1
 -5 14 -2 1.69583 2.9902 12
 -5 14 -2 -2.5903 4.02266 13
 5 -14 2 -1.7711 3.08198 20
 5 -14 2 -1.0792 3.40528 23
 5 -14 2 5.2557 2.69179 1
 5 -14 2 -3.4565 3.23541 14
 5 -14 2 -3.1501 3.30158 1
 5 -14 2 2.65223 4.13799 13
 4 13 -2 -1.4131 3.20698 9
 4 13 -2 1.59118 2.95308 24
 4 13 -2 -2.3993 2.86808 1
 4 13 -2 -0.4673 3.44053 15
 -4 -13 2 4.12392 3.78914 14
 -4 -13 2 1.55451 3.17524 20
 -4 -13 2 0.71853 2.8103 13
 -4 -13 2 5.91126 2.33735 1
 -4 -13 2 0.93865 3.28192 23
 -4 -13 2 -3.17 2.92728 1
 3 13 -2 35.6333 3.82853 24
 3 13 -2 34.1807 4.49799 1
 3 13 -2 32.54 3.66409 21
 -3 -13 2 31.4651 5.56147 21
 -3 -13 2 43.2789 5.49343 23
 -3 -13 2 30.9789 3.72134 1
 -3 -13 2 40.8865 4.5585 11
 -3 -13 2 40.3594 4.03991 13
 -3 -13 2 25.0999 3.86655 20
 -3 -13 2 37.0725 4.46472 1
 2 13 -2 18.179 3.46987 24
 2 13 -2 23.4495 3.46943 1
 2 13 -2 22.9962 3.25862 21
 -2 -13 2 22.7366 3.45376 23
 -2 -13 2 21.6241 3.45454 13
 -2 -13 2 20.0403 3.26086 1
 -2 -13 2 24.585 3.36385 11
 -2 -13 2 21.0532 4.89418 21
 -2 -13 2 21.5085 3.16485 1
 -2 -13 2 25.9714 2.03475 12
 1 13 -2 15.1058 2.10624 2
 1 13 -2 13.4008 2.96876 21
 1 13 -2 16.7296 2.98135 1
 1 13 -2 16.9393 3.29302 19
 1 13 -2 20.8247 3.25029 24
 -1 -13 2 16.4702 3.13882 13
 -1 -13 2 18.8963 3.04711 1
 -1 -13 2 18.324 3.46137 23
 -1 -13 2 9.90255 4.10843 21
 -1 -13 2 17.9518 2.92454 1
 -1 -13 2 15.5007 2.54763 20
 0 13 -2 60.7086 4.80645 21
 0 13 -2 66.4881 4.92166 1
 0 13 -2 59.0492 3.69366 7
 0 13 -2 65.1245 4.43354 24
 0 13 -2 64.9326 4.23863 2
 0 13 -2 56.5595 2.86151 19
 0 -13 2 71.6167 5.32401 23
 0 -13 2 68.5233 4.90171 13
 0 -13 2 67.0361 4.81747 1
 0 -13 2 66.2584 4.59538 1
 0 -13 2 65.5933 4.10715 20
 -1 13 -2 24.1935 3.13189 24
 -1 13 -2 23.3361 3.28447 21
 -1 13 -2 20.7982 3.3012 1
 1 -13 2 20.8164 2.6186 3
 1 -13 2 23.6863 3.0674 1
 1 -13 2 20.5241 3.0782 13
 1 -13 2 18.9209 2.71253 20
 1 -13 2 17.8286 3.12922 1
 1 -13 2 18.2534 3.56777 23
 -2 13 -2 33.207 3.78207 21
 -2 13 -2 33.4045 3.61934 24
 -2 13 -2 29.5759 3.80461 1
 2 -13 2 32.8339 3.79888 13
 2 -13 2 32.7069 2.79436 20
 2 -13 2 30.9383 2.65217 6
 2 -13 2 30.2244 4.05112 1
 2 -13 2 32.2828 3.72818 1
 2 -13 2 36.0191 4.07422 3
 2 -13 2 29.1787 4.04083 23
 -3 13 -2 32.6552 3.94683 21
 -3 13 -2 40.7781 4.48943 1
 -3 13 -2 32.6242 4.04068 13
 -3 13 -2 28.3328 3.66505 24
 -3 13 -2 35.2579 4.2849 1
 3 -13 2 42.7661 4.85236 13
 3 -13 2 44.8426 4.39542 1
 3 -13 2 34.9082 3.99856 1
 3 -13 2 29.3148 3.25405 20
 3 -13 2 27.2057 4.10242 23
 -4 13 -2 6.93134 2.62927 1
 -4 13 -2 -6.0815 2.54885 1
 -4 13 -2 2.58769 2.11976 12
 -4 13 -2 0.77673 2.9577 21
 -4 13 -2 5.01859 3.3499 13
 4 -13 2 0.92618 2.10976 22
 4 -13 2 -1.18 2.6469 1
 4 -13 2 5.99789 2.97579 14
 4 -13 2 4.69312 3.30193 13
 4 -13 2 3.63699 3.57776 23
 4 -13 2 6.43189 2.57577 1
 -5 13 -2 51.5324 6.37298 13
 -5 13 -2 53.431 4.77388 1
 -5 13 -2 44.0068 2.90284 10
 -5 13 -2 54.4176 5.59176 21
 -5 13 -2 51.3885 4.91067 12
 -5 13 -2 52.7629 4.75125 1
 5 -13 2 38.6016 4.40698 20
 5 -13 2 65.2773 6.85822 13
 5 -13 2 32.831 4.41917 1
 5 -13 2 49.3228 4.89946 1
 5 -13 2 46.744 3.1052 22
 5 -13 2 47.4616 4.97041 14
 5 -13 2 44.033 5.62152 23
 -6 13 -2 11.1038 4.4657 13
 -6 13 -2 12.5512 3.87342 12
 -6 13 -2 5.64151 3.30471 1
 -6 13 -2 5.52681 3.28505 17
 -6 13 -2 1.50971 3.44231 21
 6 -13 2 1.45183 3.38293 14
 6 -13 2 7.98606 3.57576 1
 6 -13 2 11.5363 3.73673 20
 6 -13 2 4.8907 3.636 23
 6 -13 2 -4.3656 3.02062 1
 5 12 -2 0.4133 2.48949 9
 5 12 -2 2.62227 3.34768 24
 5 12 -2 -2.4901 2.87644 3
 5 12 -2 -1.6115 3.26103 1
 5 12 -2 3.12464 2.79388 15
 -5 -12 2 0.27783 3.08641 20
 -5 -12 2 -9.197 3.27628 13
 -5 -12 2 3.82696 3.64818 14
 -5 -12 2 -0.509 2.76773 1
 -5 -12 2 5.04724 5.58156 21
 -5 -12 2 -2.7493 3.12791 23
 4 12 -2 14.3684 3.29959 15
 4 12 -2 13.0613 3.07363 9
 4 12 -2 14.0146 3.17972 1
 4 12 -2 16.4752 3.32995 24
 -4 -12 2 18.3494 3.46189 14
 -4 -12 2 13.0767 3.10966 1
 -4 -12 2 14.0964 4.67072 21
 -4 -12 2 17.1683 3.57001 20
 -4 -12 2 13.4548 3.35162 13
 -4 -12 2 11.8591 3.78312 23
 3 12 -2 31.9411 3.60833 24
 3 12 -2 29.6247 3.26943 21
 3 12 -2 22.3476 3.44592 1
 -3 -12 2 26.3832 3.4341 1
 -3 -12 2 28.3076 4.011 23
 -3 -12 2 33.1679 3.98934 11
 -3 -12 2 23.3259 3.12223 20
 -3 -12 2 33.674 3.65469 13
 -3 -12 2 24.7299 3.39771 1
 -3 -12 2 28.6747 4.17982 21
 2 12 -2 3.55277 2.56572 21
 2 12 -2 7.03828 2.76452 24
 2 12 -2 -0.2239 2.44451 1
 -2 -12 2 -0.049 2.18688 1
 -2 -12 2 4.0332 1.37309 12
 -2 -12 2 7.07986 3.19439 23
 -2 -12 2 8.12376 2.32183 20
 -2 -12 2 1.24018 2.61604 13
 -2 -12 2 4.24002 2.56754 11
 -2 -12 2 1.30818 2.39882 1
 -2 -12 2 0.83763 3.45533 21
 1 12 -2 133.274 5.62952 19
 1 12 -2 145.355 6.12823 21
 1 12 -2 152.201 5.06494 2
 1 12 -2 164.741 6.78935 1
 -1 -12 2 136.142 6.73001 21
 -1 -12 2 138.556 5.58613 20
 -1 -12 2 147.934 6.64797 13
 -1 -12 2 148.47 6.50758 1
 -1 -12 2 148.147 6.39607 23
 -1 -12 2 136.506 6.26765 1
 0 12 -2 4.72182 1.79167 7
 0 12 -2 6.53256 2.08558 24
 0 12 -2 8.02289 1.63282 19
 0 12 -2 3.24642 2.43286 1
 0 12 -2 6.84698 2.46842 21
 0 -12 2 6.07612 2.35843 1
 0 -12 2 7.17339 2.15098 20
 0 -12 2 2.53062 3.08657 21
 0 -12 2 2.39856 2.38734 1
 0 -12 2 7.71284 2.61214 13
 0 -12 2 9.92745 2.87507 23
 -1 12 -2 18.0875 2.57728 24
 -1 12 -2 20.8925 2.9488 21
 -1 12 -2 18.4928 3.03863 1
 -1 12 -2 19.5648 2.2939 7
 1 -12 2 22.0134 3.05328 13
 1 -12 2 19.2378 2.51765 3
 1 -12 2 18.9928 3.25936 23
 1 -12 2 16.7168 2.51492 20
 1 -12 2 15.8457 2.94962 1
 1 -12 2 20.679 2.83595 1
 -2 12 -2 76.4173 5.13522 1
 -2 12 -2 80.7317 5.08982 21
 -2 12 -2 65.3279 3.71949 24
 -2 12 -2 66.9462 4.74124 1
 2 -12 2 79.2012 4.53681 3
 2 -12 2 76.9133 4.9226 1
 2 -12 2 73.7684 4.0833 20
 2 -12 2 77.3417 5.06364 13
 2 -12 2 80.6966 4.8594 1
 2 -12 2 81.9798 5.42448 23
 2 -12 2 73.1831 3.10248 6
 -3 12 -2 -1.0338 2.52423 13
 -3 12 -2 1.12695 2.60871 21
 -3 12 -2 1.03177 2.41426 1
 -3 12 -2 -1.1048 2.20857 1
 3 -12 2 2.54872 2.54843 13
 3 -12 2 -1.4771 1.44359 20
 3 -12 2 0.1184 2.29694 1
 3 -12 2 0.52576 2.26614 1
 3 -12 2 -1.3744 2.84204 23
 -4 12 -2 3.63098 2.11575 12
 -4 12 -2 10.7671 3.05123 13
 -4 12 -2 3.42504 2.79018 1
 -4 12 -2 2.68574 2.81084 21
 -4 12 -2 -0.6545 2.29243 1
 4 -12 2 8.21921 2.37374 20
 4 -12 2 2.71686 2.58127 23
 4 -12 2 -2.3799 2.72863 13
 4 -12 2 -0.1959 2.22167 1
 4 -12 2 2.50977 2.70777 1
 4 -12 2 4.09717 2.6877 14
 4 -12 2 2.7624 1.84963 22
 -5 12 -2 15.4853 3.04631 21
 -5 12 -2 16.2551 2.9602 12
 -5 12 -2 19.7991 3.7393 13
 -5 12 -2 21.1084 3.08427 1
 -5 12 -2 17.4571 3.11299 1
 5 -12 2 16.2769 3.64755 23
 5 -12 2 19.7632 3.82166 13
 5 -12 2 9.77832 2.64303 1
 5 -12 2 16.4029 3.20275 1
 5 -12 2 16.975 1.71344 22
 5 -12 2 18.8399 3.2508 14
 -6 12 -2 1.3148 3.79397 13
 -6 12 -2 1.80532 2.78461 1
 -6 12 -2 6.36335 3.32203 21
 -6 12 -2 2.37326 2.53492 17
 -6 12 -2 0.17592 2.8527 1
 6 -12 2 2.24511 3.40643 20
 6 -12 2 -0.9367 2.78582 14
 6 -12 2 0.65495 1.38819 19
 6 -12 2 0.39653 2.66268 1
 6 -12 2 3.60926 3.55018 23
 6 -12 2 4.03312 3.07795 1
 6 11 -2 4.10674 3.78946 3
 -6 -11 2 -7.2511 4.10433 13
 -6 -11 2 5.32194 3.64103 14
 -6 -11 2 5.2094 3.72152 23
 5 11 -2 12.3648 2.98885 3
 5 11 -2 17.4717 3.01769 1
 5 11 -2 11.785 3.37643 24
 -5 -11 2 8.26048 3.03626 1
 -5 -11 2 9.22417 3.79457 23
 -5 -11 2 13.7759 4.67539 21
 -5 -11 2 12.0331 3.36626 20
 -5 -11 2 16.2375 3.36492 14
 -5 -11 2 10.2182 3.33853 13
 4 11 -2 12.6074 2.65802 9
 4 11 -2 14.9516 3.21568 1
 4 11 -2 13.5833 3.17546 24
 4 11 -2 12.5605 2.79778 15
 4 11 -2 13.9209 2.53712 3
 -4 -11 2 12.6326 2.54292 20
 -4 -11 2 21.0601 3.12177 14
 -4 -11 2 17.0748 3.51114 23
 -4 -11 2 14.7744 3.25919 13
 -4 -11 2 16.612 2.90994 1
 -4 -11 2 16.347 3.83266 21
 3 11 -2 -1.9244 2.07514 1
 3 11 -2 -2.3651 2.06624 21
 -3 -11 2 -1.5076 1.83211 13
 -3 -11 2 -1.3382 2.74989 23
 -3 -11 2 2.10179 1.77992 1
 -3 -11 2 2.57609 2.92868 21
 -3 -11 2 -0.9303 1.88739 20
 -3 -11 2 -0.2267 2.01293 11
 2 11 -2 52.7754 4.02227 21
 2 11 -2 56.9572 3.43349 24
 2 11 -2 55.3376 4.35516 1
 -2 -11 2 45.8253 3.41947 20
 -2 -11 2 55.4646 4.60443 21
 -2 -11 2 60.2322 4.69266 13
 -2 -11 2 48.419 4.13849 1
 -2 -11 2 53.2417 4.69502 23
 -2 -11 2 47.2467 4.06514 1
 -2 -11 2 60.1007 3.93811 11
 1 11 -2 30.6831 2.43407 2
 1 11 -2 23.8406 2.58542 24
 1 11 -2 28.46 2.79636 19
 1 11 -2 25.309 2.79759 21
 1 11 -2 28.1305 3.67225 1
 -1 -11 2 32.5727 3.50821 1
 -1 -11 2 27.8954 3.13184 21
 -1 -11 2 25.7612 3.48421 1
 -1 -11 2 30.5997 3.97029 23
 -1 -11 2 23.6627 2.63855 20
 -1 -11 2 31.3949 3.14383 13
 0 11 -2 18.243 2.11591 19
 0 11 -2 10.2698 2.30869 1
 0 11 -2 15.3904 2.21046 24
 0 11 -2 13.8106 2.50943 21
 0 -11 2 17.4398 2.2412 20
 0 -11 2 13.4085 2.64118 1
 0 -11 2 14.5312 2.37551 1
 0 -11 2 13.768 2.91258 23
 0 -11 2 17.6526 2.95126 21
 0 -11 2 16.8442 2.40376 13
 -1 11 -2 16.9698 2.40084 24
 -1 11 -2 21.0016 2.81777 21
 -1 11 -2 16.1041 2.15579 7
 -1 11 -2 15.8347 2.85311 1
 1 -11 2 17.8217 2.78757 13
 1 -11 2 18.8163 2.33629 3
 1 -11 2 12.0804 2.7425 1
 1 -11 2 16.209 2.27939 20
 1 -11 2 14.9245 2.58847 1
 1 -11 2 15.8804 3.01429 23
 -2 11 -2 12.9705 2.64225 13
 -2 11 -2 13.4226 2.1797 24
 -2 11 -2 14.3425 2.60994 1
 -2 11 -2 7.7217 2.57633 1
 -2 11 -2 12.8005 2.63098 21
 2 -11 2 16.5846 2.70064 1
 2 -11 2 11.8502 2.98476 23
 2 -11 2 12.3869 2.11645 20
 2 -11 2 10.8502 2.66519 1
 2 -11 2 11.8416 2.59667 13
 2 -11 2 13.6576 1.38474 6
 -3 11 -2 5.3587 2.12531 24
 -3 11 -2 5.38537 2.38629 1
 -3 11 -2 7.53934 2.24057 1
 -3 11 -2 2.19892 2.33953 13
 -3 11 -2 5.51511 1.54516 12
 -3 11 -2 5.32129 2.49828 21
 3 -11 2 2.63442 1.77168 14
 3 -11 2 2.65726 2.32412 13
 3 -11 2 4.9369 1.59502 20
 3 -11 2 -0.8848 2.6679 23
 3 -11 2 5.65056 2.00992 1
 3 -11 2 4.03351 2.16886 1
 -4 11 -2 74.3667 4.97059 13
 -4 11 -2 76.5278 4.12376 12
 -4 11 -2 75.131 5.11352 21
 -4 11 -2 72.6635 3.62248 10
 -4 11 -2 73.455 4.97343 1
 -4 11 -2 82.5306 5.0541 1
 4 -11 2 71.6266 4.07397 20
 4 -11 2 72.6132 4.74326 1
 4 -11 2 74.3105 5.00424 13
 4 -11 2 72.9111 3.14527 22
 4 -11 2 67.2736 4.36845 14
 4 -11 2 73.8492 5.42108 23
 4 -11 2 77.8096 5.04506 1
 -5 11 -2 3.12717 2.43972 1
 -5 11 -2 4.03645 2.84805 21
 -5 11 -2 3.40122 2.55201 1
 -5 11 -2 -0.7373 2.64612 13
 5 -11 2 1.77112 1.26574 22
 5 -11 2 1.17295 3.09936 23
 5 -11 2 1.7463 1.12654 19
 5 -11 2 -3.6286 2.02657 1
 5 -11 2 -1.9224 2.42185 1
 5 -11 2 3.83071 2.43493 20
 5 -11 2 1.3331 2.02516 7
 5 -11 2 6.25383 2.79367 14
 5 -11 2 2.48837 2.92347 13
 -6 11 -2 10.5345 3.02292 1
 -6 11 -2 14.0096 3.34716 21
 -6 11 -2 8.00912 3.46805 13
 -6 11 -2 11.554 1.88075 17
 -6 11 -2 12.2944 3.18091 1
 6 -11 2 13.4165 3.79173 23
 6 -11 2 5.91196 2.81073 14
 6 -11 2 13.1388 3.39794 20
 6 -11 2 15.5702 2.79428 1
 6 -11 2 8.82248 2.14631 19
 6 -11 2 11.4925 2.52634 4
 6 -11 2 12.674 2.90139 7
 6 -11 2 13.3401 3.21612 1
 -7 11 -2 1.08949 3.46126 21
 -7 11 -2 -1.0979 3.1472 1
 -7 11 -2 4.00742 3.75513 13
 7 -11 2 0.22429 3.00396 14
 7 -11 2 -1.9536 2.97564 23
 7 -11 2 5.00612 3.58592 7
 7 -11 2 0.07019 2.62834 20
 7 -11 2 2.03363 2.81584 19
 7 -11 2 4.89765 3.2501 1
 7 -11 2 8.94783 2.762 1
 6 10 -2 2.38597 2.99975 1
 6 10 -2 -1.346 3.08822 24
 -6 -10 2 -7.7001 3.64723 13
 -6 -10 2 -3.1069 3.8753 8
 -6 -10 2 -4.6768 3.03274 14
 -6 -10 2 3.2233 4.67798 21
 -6 -10 2 0.34736 3.11494 20
 5 10 -2 13.3599 3.06322 24
 5 10 -2 18.0568 3.12111 1
 -5 -10 2 10.8627 3.09802 13
 -5 -10 2 11.9133 2.95579 1
 -5 -10 2 12.8502 3.914 21
 -5 -10 2 16.3858 2.99018 14
 -5 -10 2 16.6333 3.78129 23
 4 10 -2 2.99161 1.95086 9
 4 10 -2 0.34936 2.24878 1
 4 10 -2 2.80164 2.1118 15
 4 10 -2 3.24808 2.11339 3
 4 10 -2 5.06212 2.63509 24
 -4 -10 2 4.54437 2.25214 14
 -4 -10 2 1.73025 1.52942 20
 -4 -10 2 1.81932 2.47587 13
 -4 -10 2 6.26099 2.97071 23
 -4 -10 2 1.45324 1.84124 1
 -4 -10 2 1.59069 2.97371 21
 3 10 -2 12.0733 2.10969 24
 3 10 -2 6.65912 2.19778 21
 3 10 -2 9.62534 2.63985 1
 3 10 -2 6.21711 1.86566 3
 -3 -10 2 8.3986 2.86822 23
 -3 -10 2 9.81001 2.70804 21
 -3 -10 2 7.16146 2.1731 13
 -3 -10 2 6.65417 2.03856 11
 -3 -10 2 8.60853 1.98939 20
 -3 -10 2 7.59949 2.4521 1
 2 10 -2 84.73 4.99793 1
 2 10 -2 93.2444 3.99995 24
 2 10 -2 91.0177 4.57973 21
 -2 -10 2 92.2772 5.16796 13
 -2 -10 2 87.5371 4.04549 20
 -2 -10 2 94.7808 4.3728 11
 -2 -10 2 91.9536 4.89852 1
 -2 -10 2 91.2267 5.23085 23
 -2 -10 2 90.3572 4.84265 1
 -2 -10 2 97.5435 4.90853 21
 1 10 -2 -0.8216 1.95987 21
 1 10 -2 1.84564 1.73953 24
 1 10 -2 0.8668 2.10843 1
 1 10 -2 1.11129 1.16622 2
 -1 -10 2 -0.1276 2.08658 13
 -1 -10 2 -0.9564 1.89539 1
 -1 -10 2 1.717 2.0498 21
 -1 -10 2 -1.451 1.42612 1
 -1 -10 2 1.31743 2.24078 23
 -1 -10 2 -1.2312 1.49568 20
 -1 -10 2 0.1397 0.73179 12
 0 10 -2 96.7031 4.27166 23
 0 10 -2 107.348 4.03979 24
 0 10 -2 107.191 4.86856 21
 0 10 -2 110.342 5.18924 1
 0 10 -2 104.144 3.45565 19
 0 -10 2 101.037 4.03839 3
 0 -10 2 102.364 5.10978 13
 0 -10 2 102.023 5.24829 23
 0 -10 2 96.677 3.9542 20
 0 -10 2 104.444 5.02461 1
 0 -10 2 98.8523 4.69629 21
 0 -10 2 113.58 5.06815 1
 -1 10 -2 20.4877 2.85945 1
 -1 10 -2 20.9326 2.74179 13
 -1 10 -2 21.3974 2.30336 24
 -1 10 -2 20.9037 2.08822 23
 -1 10 -2 20.4793 2.09213 7
 -1 10 -2 21.2662 2.50081 21
 1 -10 2 27.9776 2.88906 3
 1 -10 2 19.3455 3.04412 23
 1 -10 2 19.859 2.2496 20
 1 -10 2 21.4777 2.78688 13
 1 -10 2 19.0271 2.77079 1
 1 -10 2 25.043 3.17361 1
 -2 10 -2 70.0577 4.54475 1
 -2 10 -2 79.9365 4.05964 1
 -2 10 -2 64.8931 3.50059 23
 -2 10 -2 71.0652 3.5174 24
 -2 10 -2 71.2804 4.30188 13
 -2 10 -2 73.1186 4.28984 21
 2 -10 2 74.0782 2.55216 6
 2 -10 2 73.2052 3.98387 1
 2 -10 2 78.3698 4.52707 1
 2 -10 2 65.3214 3.4109 20
 2 -10 2 78.504 4.34007 13
 2 -10 2 71.4569 4.63188 23
 -3 10 -2 1.32841 2.07508 13
 -3 10 -2 4.90404 1.91567 24
 -3 10 -2 1.19848 1.84031 1
 -3 10 -2 2.68157 2.22221 1
 -3 10 -2 4.99149 2.32072 21
 -3 10 -2 2.9777 1.44318 12
 3 -10 2 6.86169 1.54439 20
 3 -10 2 0.25652 2.17342 14
 3 -10 2 2.41477 2.04555 13
 3 -10 2 2.94416 2.6473 23
 3 -10 2 4.05672 2.23339 1
 3 -10 2 4.08741 1.44886 22
 3 -10 2 5.81767 2.09338 1
 -4 10 -2 84.0184 4.83354 1
 -4 10 -2 69.4766 4.86924 13
 -4 10 -2 72.2759 3.354 10
 -4 10 -2 75.459 4.74621 1
 -4 10 -2 78.5548 5.01821 21
 4 -10 2 72.8229 2.41192 19
 4 -10 2 73.9224 5.16203 23
 4 -10 2 74.0171 3.9938 20
 4 -10 2 83.6335 4.70481 1
 4 -10 2 75.6706 4.87768 14
 4 -10 2 73.6266 4.65851 13
 4 -10 2 78.3445 4.77305 1
 4 -10 2 75.1864 2.94435 22
 -5 10 -2 0.12249 1.57866 1
 -5 10 -2 3.11716 2.60718 13
 -5 10 -2 4.62193 2.45233 1
 -5 10 -2 6.28116 2.71888 21
 5 -10 2 4.86454 1.60971 19
 5 -10 2 4.36237 1.00662 22
 5 -10 2 7.35195 2.18093 7
 5 -10 2 6.29802 1.88104 1
 5 -10 2 7.03371 2.61888 14
 5 -10 2 1.35379 2.4476 1
 5 -10 2 5.15073 3.07762 23
 5 -10 2 6.89938 2.22831 20
 -6 10 -2 7.62632 3.21288 21
 -6 10 -2 6.75264 2.54868 1
 -6 10 -2 7.2162 2.49814 1
 -6 10 -2 -2.7202 2.71891 13
 6 -10 2 2.39672 3.14907 23
 6 -10 2 4.99685 1.9506 4
 6 -10 2 11.199 2.50231 1
 6 -10 2 5.89619 2.75236 7
 6 -10 2 6.73647 2.74653 1
 6 -10 2 6.01511 2.70871 14
 -7 10 -2 -0.5452 3.45436 13
 -7 10 -2 5.93409 3.58265 21
 -7 10 -2 -1.4152 2.82952 1
 -7 10 -2 -0.1925 2.62655 1
 7 -10 2 -2.0495 2.53692 1
 7 -10 2 -3.6657 2.80694 1
 7 -10 2 0.87796 2.87525 20
 7 -10 2 1.08399 2.6444 14
 7 -10 2 -6.322 3.1283 7
 7 -10 2 -1.488 3.0421 23
 7 9 -2 2.56175 3.19855 1
 7 9 -2 4.94522 3.55105 1
 -7 -9 2 1.68439 3.4323 14
 -7 -9 2 -8.5786 4.65005 13
 -7 -9 2 -2.1635 3.42983 1
 -7 -9 2 6.71074 4.22813 8
 6 9 -2 2.04477 2.88317 24
 6 9 -2 15.3797 3.03884 1
 -6 -9 2 3.74068 3.62842 13
 -6 -9 2 9.88413 3.62617 8
 -6 -9 2 5.01418 2.78079 14
 -6 -9 2 8.52386 4.1401 21
 -6 -9 2 8.5383 3.07429 20
 -6 -9 2 5.48352 2.65028 1
 5 9 -2 1.63969 2.49389 1
 5 9 -2 4.6555 2.51055 24
 -5 -9 2 2.27849 2.12642 20
 -5 -9 2 0.11286 2.818 13
 -5 -9 2 -0.4509 2.7624 21
 -5 -9 2 -2.5124 3.04355 8
 -5 -9 2 -3.561 2.31928 1
 -5 -9 2 1.34025 2.23071 14
 4 9 -2 4.77364 1.82485 24
 4 9 -2 0.46433 1.62284 15
 4 9 -2 2.86174 1.83445 1
 4 9 -2 0.03008 1.49261 9
 -4 -9 2 -0.3824 1.8539 14
 -4 -9 2 1.07984 1.79269 20
 -4 -9 2 0.3785 2.48289 21
 -4 -9 2 0.12193 2.08552 1
 -4 -9 2 -3.6465 2.35991 13
 -4 -9 2 1.77468 2.73566 23
 3 9 -2 73.8646 3.99573 21
 3 9 -2 74.7895 3.59128 3
 3 9 -2 79.3448 4.707 1
 3 9 -2 76.7107 3.55373 24
 -3 -9 2 71.9909 4.39655 21
 -3 -9 2 71.7044 4.60826 13
 -3 -9 2 72.1322 4.73267 23
 -3 -9 2 73.2493 3.67715 20
 -3 -9 2 80.7742 4.55583 1
 2 9 -2 0.73068 1.68931 21
 2 9 -2 1.92587 1.44047 3
 2 9 -2 0.10945 1.44276 24
 2 9 -2 -0.1156 1.59495 1
 -2 -9 2 2.01971 1.68379 11
 -2 -9 2 1.9956 1.95979 13
 -2 -9 2 3.6651 1.69535 1
 -2 -9 2 2.61369 1.47917 20
 -2 -9 2 3.72219 2.22378 23
 -2 -9 2 -1.3035 1.69995 1
 -2 -9 2 3.32947 1.87872 21
 1 9 -2 231.921 6.93868 24
 1 9 -2 236.645 7.93276 1
 1 9 -2 234.477 6.39344 2
 1 9 -2 229.413 7.23661 21
 -1 -9 2 233.651 7.91278 13
 -1 -9 2 231.088 7.28014 21
 -1 -9 2 230.221 7.82072 1
 -1 -9 2 227.085 6.99893 20
 -1 -9 2 234.44 7.88342 23
 -1 -9 2 226.011 5.90798 12
 -1 -9 2 235.554 7.86556 1
 0 9 -2 95.4666 3.8793 23
 0 9 -2 88.5647 3.0287 19
 0 9 -2 89.8785 3.64539 24
 0 9 -2 85.5929 4.03981 21
 0 9 -2 89.9778 4.57824 1
 0 -9 2 85.9233 4.47326 1
 0 -9 2 89.6802 4.63772 23
 0 -9 2 86.9155 4.37129 1
 0 -9 2 84.9187 4.0177 21
 0 -9 2 89.5551 3.61689 3
 0 -9 2 83.3211 3.43088 20
 0 -9 2 83.729 4.45263 13
 -1 9 -2 83.5913 3.22347 7
 -1 9 -2 83.9474 3.49622 23
 -1 9 -2 79.4926 4.07655 21
 -1 9 -2 85.1862 4.30638 13
 -1 9 -2 81.9489 4.39658 1
 -1 9 -2 86.1536 3.39504 24
 -1 9 -2 77.163 4.27345 1
 1 -9 2 80.6313 4.47035 23
 1 -9 2 85.3268 4.33678 13
 1 -9 2 89.5665 3.81747 3
 1 -9 2 76.6305 4.30761 1
 1 -9 2 84.9391 3.56497 20
 1 -9 2 86.6377 4.35382 1
 -2 9 -2 136.036 5.48974 13
 -2 9 -2 129.488 4.66517 24
 -2 9 -2 130.995 5.28272 21
 -2 9 -2 131.587 5.19042 1
 -2 9 -2 128.589 5.23893 1
 -2 9 -2 129.157 4.83603 23
 -2 9 -2 134.077 4.00281 12
 2 -9 2 129.741 5.57291 23
 2 -9 2 131.899 3.66112 6
 2 -9 2 137.238 5.35922 13
 2 -9 2 134.328 5.25182 1
 2 -9 2 134.717 5.26617 1
 2 -9 2 130.238 4.68752 20
 -3 9 -2 -1.9778 1.4047 23
 -3 9 -2 -2.3457 1.9302 1
 -3 9 -2 -1.3479 2.02489 21
 -3 9 -2 -1.609 1.73259 13
 -3 9 -2 -0.592 1.87092 1
 -3 9 -2 2.59302 1.66264 24
 3 -9 2 -0.5668 1.76188 1
 3 -9 2 -1.4258 1.94946 1
 3 -9 2 -0.8102 1.14631 22
 3 -9 2 -2.8258 1.71545 14
 3 -9 2 -1.9036 2.36513 23
 3 -9 2 0.2424 0.60639 19
 3 -9 2 -1.9384 1.63803 13
 3 -9 2 -2.6127 1.47813 20
 -4 9 -2 -0.6738 2.45413 21
 -4 9 -2 1.00528 1.91194 1
 -4 9 -2 0.93825 1.87425 1
 -4 9 -2 -3.1657 1.98995 13
 -4 9 -2 -0.4433 1.26821 10
 4 -9 2 1.92139 2.02018 1
 4 -9 2 -0.5361 1.65712 20
 4 -9 2 -0.0545 2.50464 23
 4 -9 2 2.60819 1.87576 1
 4 -9 2 -0.7636 1.164 19
 4 -9 2 -1.0963 2.2148 14
 4 -9 2 -1.393 1.08119 22
 4 -9 2 -1.3603 2.03204 13
 4 -9 2 0.57196 1.56259 7
 -5 9 -2 37.9801 3.97093 1
 -5 9 -2 30.6519 3.98912 1
 -5 9 -2 35.3369 2.4838 17
 -5 9 -2 31.2941 3.30038 13
 -5 9 -2 41.1823 4.23643 21
 5 -9 2 30.2752 3.42493 14
 5 -9 2 38.0799 3.22973 20
 5 -9 2 30.9133 3.62021 23
 5 -9 2 29.9725 3.64984 1
 5 -9 2 34.4794 3.46889 7
 5 -9 2 40.1842 4.07822 1
 -6 9 -2 2.03826 2.57762 13
 -6 9 -2 0.96114 2.21783 1
 -6 9 -2 -1.204 2.51553 1
 -6 9 -2 0.23446 2.8289 21
 6 -9 2 1.66546 2.8784 23
 6 -9 2 3.48539 1.85365 20
 6 -9 2 4.43634 2.45366 14
 6 -9 2 4.28153 2.58745 1
 6 -9 2 4.83732 1.48292 4
 6 -9 2 -0.0481 2.11024 1
 6 -9 2 3.34637 2.5719 7
 -7 9 -2 5.08178 2.31583 1
 -7 9 -2 5.21168 2.33092 6
 -7 9 -2 5.617 2.86488 1
 -7 9 -2 4.62848 3.27998 13
 -7 9 -2 6.52744 3.26837 21
 7 -9 2 10.2945 3.08777 20
 7 -9 2 8.91061 2.89853 1
 7 -9 2 6.43741 2.69536 14
 7 -9 2 6.91793 2.24518 1
 7 -9 2 4.4198 3.34378 23
 -8 9 -2 1.35053 4.05213 13
 -8 9 -2 3.77711 2.01354 5
 -8 9 -2 3.98082 3.10687 6
 -8 9 -2 -1.9739 3.26893 1
 -8 9 -2 2.49124 2.68292 1
 -8 9 -2 -2.3049 3.46198 21
 8 -9 2 0.11406 3.48957 14
 8 -9 2 -0.3216 3.60491 23
 8 -9 2 2.73872 3.06897 1
 8 -9 2 3.0184 2.93076 20
 8 -9 2 3.13856 3.32238 1
 7 8 -2 12.4796 3.15584 24
 7 8 -2 11.8462 3.46692 1
 7 8 -2 5.26199 2.66997 1
 -7 -8 2 6.37469 4.34401 13
 -7 -8 2 6.59007 3.23316 20
 -7 -8 2 9.92333 4.70512 21
 -7 -8 2 4.65993 2.89495 1
 -7 -8 2 11.9409 3.90476 8
 -7 -8 2 9.34009 3.20319 14
 6 8 -2 7.92834 3.04946 24
 6 8 -2 3.69993 2.4373 1
 -6 -8 2 2.63023 2.41241 1
 -6 -8 2 7.23669 3.36844 21
 -6 -8 2 7.20674 3.15627 8
 -6 -8 2 2.7737 1.82565 20
 -6 -8 2 2.59693 3.33721 13
 -6 -8 2 2.73481 2.41671 14
 5 8 -2 45.5615 4.14216 1
 -5 -8 2 36.4809 3.09393 20
 -5 -8 2 38.6481 4.5699 8
 -5 -8 2 39.9565 4.5537 13
 -5 -8 2 36.9647 3.96353 1
 -5 -8 2 42.1484 3.60431 14
 -5 -8 2 37.9946 4.37728 21
 4 8 -2 -0.9539 1.46308 24
 4 8 -2 1.29475 2.1421 1
 4 8 -2 0.89032 1.31755 15
 4 8 -2 0.76735 1.24828 9
 -4 -8 2 0.22318 1.66885 20
 -4 -8 2 1.20577 2.19656 13
 -4 -8 2 0.55919 1.90387 21
 -4 -8 2 -0.1667 2.05075 1
 -4 -8 2 1.79225 1.69381 14
 3 8 -2 2.03233 1.59943 3
 3 8 -2 4.6228 1.62911 24
 3 8 -2 3.52028 2.19091 1
 3 8 -2 3.79619 1.61189 21
 -3 -8 2 4.77864 2.05095 1
 -3 -8 2 5.88926 2.43979 23
 -3 -8 2 6.06076 1.81149 21
 -3 -8 2 2.34434 1.61631 20
 -3 -8 2 4.33151 2.12598 13
 2 8 -2 54.5191 2.61963 24
 2 8 -2 51.3607 2.77708 3
 2 8 -2 50.8072 3.14654 21
 2 8 -2 55.3457 3.74474 1
 -2 -8 2 60.1173 3.43708 13
 -2 -8 2 60.0687 2.95818 20
 -2 -8 2 53.964 3.26756 21
 -2 -8 2 53.1168 3.75684 23
 -2 -8 2 54.9665 3.67678 1
 -2 -8 2 56.0522 3.10753 11
 1 8 -2 119.2 4.97364 1
 1 8 -2 115.501 3.5438 2
 1 8 -2 120.662 4.11401 24
 1 8 -2 109.93 4.25253 21
 -1 -8 2 117.289 4.89875 1
 -1 -8 2 108.978 4.8503 1
 -1 -8 2 102.477 4.30572 21
 -1 -8 2 115.064 4.68358 13
 -1 -8 2 115.114 4.94555 23
 -1 -8 2 117.027 4.13969 20
 0 8 -2 -0.2866 1.17774 23
 0 8 -2 0.14089 1.2527 24
 0 8 -2 0.02838 1.53128 21
 0 8 -2 -1.1351 1.60213 13
 0 8 -2 -0.8248 1.31619 1
 0 8 -2 0.63115 1.00494 19
 0 -8 2 -1.4719 1.28168 1
 0 -8 2 1.74068 1.39437 13
 0 -8 2 2.63474 1.41801 1
 0 -8 2 -0.5541 1.37231 21
 0 -8 2 -1.249 0.90154 20
 0 -8 2 0.27122 1.87963 23
 0 -8 2 1.03069 1.2474 3
 -1 8 -2 257.234 7.61716 21
 -1 8 -2 247.036 6.93546 7
 -1 8 -2 258.85 7.89364 13
 -1 8 -2 251.92 7.22445 24
 -1 8 -2 253.483 8.02699 1
 -1 8 -2 259.384 7.61797 23
 -1 8 -2 250.84 8.04456 1
 1 -8 2 255.08 8.00922 23
 1 -8 2 257.236 8.09588 1
 1 -8 2 253.279 7.71429 13
 1 -8 2 250.469 7.29186 20
 1 -8 2 253.976 8.03328 1
 -2 8 -2 41.3674 3.15857 13
 -2 8 -2 42.9621 2.53353 24
 -2 8 -2 42.2505 3.28855 1
 -2 8 -2 44.4166 3.26173 21
 -2 8 -2 39.4965 3.17842 1
 -2 8 -2 42.4871 2.07278 12
 -2 8 -2 42.2336 2.46761 23
 2 -8 2 40.5224 2.23939 20
 2 -8 2 41.155 3.06387 13
 2 -8 2 41.679 3.19528 1
 2 -8 2 42.5449 2.99171 23
 2 -8 2 46.6846 3.35937 1
 -3 8 -2 22.7159 3.01684 13
 -3 8 -2 24.1166 2.29311 24
 -3 8 -2 26.4415 3.16457 21
 -3 8 -2 26.5733 3.13777 1
 -3 8 -2 21.6375 1.86567 23
 -3 8 -2 28.2146 3.06502 1
 3 -8 2 27.6884 2.63389 14
 3 -8 2 26.0003 2.85047 13
 3 -8 2 26.5559 2.3859 20
 3 -8 2 25.8236 2.91446 1
 3 -8 2 25.3352 1.71499 22
 3 -8 2 23.4731 2.80826 23
 3 -8 2 27.0154 2.16602 7
 3 -8 2 26.07 1.49417 19
 3 -8 2 24.4381 3.1071 1
 -4 8 -2 200.425 6.99614 1
 -4 8 -2 183.781 5.40952 10
 -4 8 -2 182.266 6.16931 23
 -4 8 -2 191.27 6.87124 21
 -4 8 -2 181.608 6.92044 1
 -4 8 -2 185.788 6.6089 13
 4 -8 2 187.158 7.01342 23
 4 -8 2 184.737 6.9034 1
 4 -8 2 189.317 6.96031 14
 4 -8 2 188.691 4.97701 22
 4 -8 2 183.497 6.13789 20
 4 -8 2 187.727 6.02637 7
 4 -8 2 186.828 6.96753 1
 4 -8 2 202.439 6.7088 13
 -5 8 -2 51.1349 4.1085 13
 -5 8 -2 50.0231 3.99897 1
 -5 8 -2 49.2616 3.52803 1
 -5 8 -2 48.839 1.98391 17
 5 -8 2 51.2851 3.31979 20
 5 -8 2 42.467 3.94917 1
 5 -8 2 47.5664 3.52597 1
 5 -8 2 47.1702 4.14556 14
 5 -8 2 46.0831 2.68249 4
 5 -8 2 44.9085 4.33998 23
 -6 8 -2 2.58237 1.70144 6
 -6 8 -2 3.53837 1.87074 1
 -6 8 -2 0.12642 2.1231 1
 -6 8 -2 -0.6579 2.28878 13
 6 -8 2 5.22274 2.1948 20
 6 -8 2 1.52945 1.81719 1
 6 -8 2 -0.2686 2.23587 14
 6 -8 2 1.75379 2.20224 1
 6 -8 2 -0.4666 2.77303 23
 -7 8 -2 1.98519 1.8066 5
 -7 8 -2 -5.0553 2.30917 1
 -7 8 -2 1.89708 2.17946 6
 -7 8 -2 0.18542 2.5143 1
 -7 8 -2 0.46639 2.87836 13
 7 -8 2 -0.4853 2.50726 1
 7 -8 2 -2.2979 2.46939 14
 7 -8 2 2.08923 2.26452 1
 7 -8 2 -2.3574 2.96348 23
 -8 8 -2 3.22577 3.69664 13
 -8 8 -2 -3.6341 2.99639 1
 -8 8 -2 2.28554 3.08789 6
 -8 8 -2 -4.3901 2.31837 1
 8 -8 2 -3.3948 3.31142 23
 8 -8 2 4.65454 2.68086 1
 8 -8 2 -2.9605 3.32808 14
 8 -8 2 2.3649 3.33965 1
 7 7 -2 1.15246 2.61062 24
 7 7 -2 5.46304 3.17402 1
 7 7 -2 -2.1754 2.35979 1
 -7 -7 2 -0.2332 4.00632 21
 -7 -7 2 -0.7578 3.74551 13
 -7 -7 2 1.67224 3.20675 8
 -7 -7 2 -0.9133 2.94637 20
 -7 -7 2 -0.119 2.71652 14
 -7 -7 2 1.43323 2.6616 1
 6 7 -2 4.17246 1.78795 1
 6 7 -2 4.47165 2.69375 1
 6 7 -2 6.92239 2.81986 24
 -6 -7 2 4.98865 2.91652 21
 -6 -7 2 4.39144 2.80311 8
 -6 -7 2 5.38675 2.10322 1
 -6 -7 2 4.86087 2.22646 14
 -6 -7 2 5.6483 2.03778 20
 5 7 -2 9.35965 2.52082 1
 5 7 -2 11.961 2.01482 24
 -5 -7 2 7.17902 2.5034 1
 -5 -7 2 7.20508 2.64657 13
 -5 -7 2 12.2138 2.38104 21
 -5 -7 2 9.28841 1.91501 14
 -5 -7 2 6.81303 2.55953 8
 -5 -7 2 10.6335 2.1829 20
 4 7 -2 1.80184 1.52466 24
 4 7 -2 2.6556 0.94577 9
 4 7 -2 4.13628 2.24963 1
 4 7 -2 2.33451 1.01317 15
 -4 -7 2 0.52779 1.99142 1
 -4 -7 2 0.87631 1.46299 14
 -4 -7 2 1.1955 1.62508 21
 -4 -7 2 0.84852 1.56276 20
 -4 -7 2 1.06104 2.03978 13
 -4 -7 2 1.25737 1.59196 23
 3 7 -2 19.0984 2.27708 21
 3 7 -2 21.0467 2.01219 24
 3 7 -2 16.7838 2.52068 1
 -3 -7 2 16.1754 2.45399 13
 -3 -7 2 22.0268 2.94855 1
 -3 -7 2 19.088 2.06782 20
 -3 -7 2 18.6216 1.85484 21
 2 7 -2 23.0213 2.09135 3
 2 7 -2 23.0378 1.71656 24
 2 7 -2 21.1348 2.46806 1
 2 7 -2 20.9706 2.32118 21
 -2 -7 2 24.6543 2.42376 13
 -2 -7 2 26.1296 1.76062 20
 -2 -7 2 21.2002 2.30442 21
 -2 -7 2 20.3644 2.64358 1
 -2 -7 2 23.0198 2.92245 23
 -2 -7 2 23.9187 2.28051 11
 1 7 -2 0.77995 1.21602 21
 1 7 -2 0.49739 1.21118 24
 1 7 -2 -3.2693 1.58626 1
 -1 -7 2 0.97687 1.28386 21
 -1 -7 2 1.34001 1.62299 1
 -1 -7 2 1.20745 1.74335 13
 -1 -7 2 -0.1564 1.37993 23
 -1 -7 2 0.08809 1.13058 20
 -1 -7 2 -0.5352 1.57344 1
 0 7 -2 355.003 10.1646 13
 0 7 -2 353.261 9.69625 21
 0 7 -2 372.268 9.052 19
 0 7 -2 370.012 10.3245 1
 0 7 -2 362.157 9.53586 24
 0 7 -2 359.219 9.94381 23
 0 -7 2 355.047 10.324 23
 0 -7 2 357.808 9.66116 21
 0 -7 2 345.923 10.0247 13
 0 -7 2 374.037 10.2673 1
 0 -7 2 360.651 9.62324 3
 0 -7 2 361.553 10.2533 1
 0 -7 2 355.874 9.52797 20
 -1 7 -2 19.841 2.01954 23
 -1 7 -2 26.9654 1.17294 12
 -1 7 -2 26.212 1.89841 7
 -1 7 -2 28.1628 2.8004 1
 -1 7 -2 25.8391 2.6517 13
 -1 7 -2 23.9517 2.53313 21
 -1 7 -2 21.7982 1.9518 24
 -1 7 -2 23.458 2.72568 1
 1 -7 2 24.1557 2.7243 1
 1 -7 2 23.5688 1.9309 20
 1 -7 2 22.1767 2.58702 13
 1 -7 2 22.0271 2.66672 1
 1 -7 2 26.7496 2.41127 23
 -2 7 -2 51.9984 3.27158 1
 -2 7 -2 44.0856 3.02195 13
 -2 7 -2 51.282 3.24538 1
 -2 7 -2 56.8551 3.24577 21
 -2 7 -2 52.1782 2.55961 24
 -2 7 -2 52.6322 2.69521 23
 2 -7 2 52.5669 2.58744 20
 2 -7 2 51.8354 1.74157 19
 2 -7 2 56.1832 3.09357 23
 2 -7 2 50.8377 2.98962 13
 2 -7 2 50.0959 3.19548 1
 2 -7 2 55.8498 3.31314 1
 -3 7 -2 80.1512 3.75407 1
 -3 7 -2 79.9471 4.00546 21
 -3 7 -2 77.1853 3.74177 13
 -3 7 -2 87.3355 4.16695 1
 -3 7 -2 86.6522 3.49218 23
 3 -7 2 76.7929 4.11859 23
 3 -7 2 82.8832 2.73775 19
 3 -7 2 82.0067 2.64586 22
 3 -7 2 85.1386 4.12854 1
 3 -7 2 80.6869 4.14134 14
 3 -7 2 85.4099 3.43781 20
 3 -7 2 78.4634 3.77047 13
 3 -7 2 85.1857 3.82362 1
 3 -7 2 86.0503 3.33425 7
 -4 7 -2 94.3214 4.19504 1
 -4 7 -2 98.3376 4.65206 1
 -4 7 -2 85.4179 3.75189 23
 -4 7 -2 91.7617 4.13579 13
 4 -7 2 82.5876 2.68996 22
 4 -7 2 95.2167 4.62905 14
 4 -7 2 88.6137 3.54559 20
 4 -7 2 96.9001 3.92391 7
 4 -7 2 90.322 4.52268 1
 4 -7 2 87.6853 2.64077 16
 4 -7 2 87.56 4.66188 23
 4 -7 2 91.1568 4.23703 1
 -5 7 -2 7.48994 2.24779 1
 -5 7 -2 15.0609 1.66011 6
 -5 7 -2 14.9394 2.29827 13
 -5 7 -2 18.1476 2.71785 1
 5 -7 2 13.9427 2.53586 1
 5 -7 2 12.8556 2.42532 23
 5 -7 2 14.4865 2.49014 14
 5 -7 2 13.0082 1.64798 4
 5 -7 2 19.1196 2.72538 1
 -6 7 -2 94.1139 5.19778 1
 -6 7 -2 95.1543 4.14439 6
 -6 7 -2 101.454 5.1945 13
 -6 7 -2 98.4302 5.44356 1
 6 -7 2 98.408 5.25934 14
 6 -7 2 93.0771 5.47343 23
 6 -7 2 90.0274 5.17941 1
 6 -7 2 92.3952 5.0969 1
 -7 7 -2 17.3246 3.08475 1
 -7 7 -2 22.1945 2.79236 6
 -7 7 -2 17.2518 1.94466 5
 -7 7 -2 20.915 3.20421 13
 -7 7 -2 21.4688 3.15604 1
 7 -7 2 23.9004 3.72675 23
 7 -7 2 17.4835 3.0374 1
 7 -7 2 18.7424 3.28282 14
 7 -7 2 20.2185 2.86262 1
 -8 7 -2 18.1568 3.0909 1
 -8 7 -2 23.0662 3.60139 6
 -8 7 -2 18.6728 3.79271 13
 -8 7 -2 13.774 3.08898 1
 8 -7 2 17.1456 3.0507 1
 8 -7 2 17.2575 3.94555 23
 8 -7 2 20.9335 3.58848 14
 8 -7 2 19.7201 3.16904 1
 8 6 -2 0.67019 3.36531 1
 8 6 -2 -0.7269 3.08125 11
 8 6 -2 -4.0594 3.06221 5
 8 6 -2 -0.982 2.76536 24
 -8 -6 2 -2.08 3.04569 20
 -8 -6 2 -0.6047 3.44923 14
 7 6 -2 -1.0832 2.59344 24
 7 6 -2 0.84114 2.76804 1
 7 6 -2 -1.0812 2.40334 11
 -7 -6 2 1.55122 3.70609 21
 -7 -6 2 -2.0918 2.47424 14
 6 6 -2 19.8418 3.13312 1
 6 6 -2 14.3457 2.66157 1
 6 6 -2 14.6483 2.27548 11
 -6 -6 2 11.8389 2.79923 1
 -6 -6 2 13.8715 2.27867 14
 -6 -6 2 16.9221 2.78348 8
 -6 -6 2 7.77772 2.05239 20
 -6 -6 2 11.4548 2.75891 21
 5 6 -2 11.4664 2.68526 1
 5 6 -2 12.4953 1.97553 11
 5 6 -2 10.0779 1.81955 24
 -5 -6 2 8.97009 2.4362 1
 -5 -6 2 11.0293 2.04388 20
 -5 -6 2 10.6115 1.85702 14
 -5 -6 2 11.5504 2.1322 21
 -5 -6 2 7.43327 2.37194 8
 4 6 -2 1.39737 1.85804 1
 4 6 -2 -1.5923 1.27178 24
 -4 -6 2 -1.8988 1.27524 20
 -4 -6 2 -0.6444 1.2486 14
 -4 -6 2 -0.3263 1.44603 23
 -4 -6 2 -3.1483 1.74331 1
 -4 -6 2 -0.5428 1.71969 8
 -4 -6 2 -0.3673 1.44856 21
 3 6 -2 26.2046 1.97584 24
 3 6 -2 20.5731 2.76279 1
 -3 -6 2 26.2341 2.81931 1
 -3 -6 2 20.9942 2.46925 13
 -3 -6 2 22.3866 1.92163 20
 -3 -6 2 25.085 2.21363 21
 -3 -6 2 22.8833 2.04811 14
 2 6 -2 3.22781 1.28052 3
 2 6 -2 0.99042 1.53501 1
 2 6 -2 3.99515 1.21882 24
 -2 -6 2 -0.581 1.56838 1
 -2 -6 2 2.97229 1.22738 11
 -2 -6 2 0.9599 1.62605 13
 -2 -6 2 2.85948 1.17301 20
 -2 -6 2 3.74824 1.1742 21
 -2 -6 2 0.72187 1.73656 23
 1 6 -2 221.589 6.15648 24
 1 6 -2 220.524 6.84337 1
 1 6 -2 216.79 6.17026 3
 -1 -6 2 224.061 6.83531 1
 -1 -6 2 226.322 6.87983 1
 -1 -6 2 218.292 6.72675 13
 -1 -6 2 219.781 6.21452 20
 -1 -6 2 216.882 6.70649 23
 -1 -6 2 217.644 6.17076 21
 0 6 -2 567.434 13.3995 19
 0 6 -2 543.4 13.9754 21
 0 6 -2 550.378 14.1728 23
 0 6 -2 553.885 14.3467 1
 0 6 -2 547.896 13.7606 24
 0 6 -2 544.895 14.321 13
 0 -6 2 550.657 13.9398 3
 0 -6 2 544.609 14.2581 23
 0 -6 2 535.033 14.3192 13
 0 -6 2 540.853 13.8328 21
 0 -6 2 560.526 14.4122 1
 0 -6 2 539.605 14.2886 1
 0 -6 2 564.142 13.8571 20
 -1 6 -2 116.331 4.4736 1
 -1 6 -2 112.885 3.10326 12
 -1 6 -2 110.778 4.35004 1
 -1 6 -2 114.075 4.30545 13
 -1 6 -2 113.42 3.71009 24
 -1 6 -2 119.174 4.10082 21
 -1 6 -2 118.292 4.0686 23
 -1 6 -2 114.183 3.71037 7
 1 -6 2 115.702 4.32819 23
 1 -6 2 112.268 4.23131 13
 1 -6 2 117.827 3.81344 20
 1 -6 2 117.934 4.44323 1
 1 -6 2 114.391 4.42146 1
 -2 6 -2 201.508 6.45394 1
 -2 6 -2 203.063 6.25647 13
 -2 6 -2 208.412 6.15866 23
 -2 6 -2 206.444 6.5342 1
 -2 6 -2 208.888 5.86814 24
 -2 6 -2 200.609 6.22782 21
 2 -6 2 198.647 6.20466 14
 2 -6 2 212.656 5.31398 19
 2 -6 2 200.468 6.22276 13
 2 -6 2 205.112 6.49963 1
 2 -6 2 207.023 5.37821 22
 2 -6 2 205.212 5.92116 20
 2 -6 2 209.507 5.80354 7
 2 -6 2 205.379 6.49677 1
 -3 6 -2 16.1267 2.12001 1
 -3 6 -2 17.2384 1.65557 10
 -3 6 -2 14.5063 1.73062 23
 -3 6 -2 15.7529 2.00484 1
 -3 6 -2 17.2998 1.9395 13
 3 -6 2 14.8551 1.23017 22
 3 -6 2 16.142 2.0574 7
 3 -6 2 18.2469 2.05377 1
 3 -6 2 15.2526 1.23025 16
 3 -6 2 17.9067 1.85994 20
 3 -6 2 15.133 2.22678 23
 3 -6 2 14.4783 1.85924 14
 3 -6 2 15.886 1.86212 13
 3 -6 2 15.2141 2.10685 1
 -4 6 -2 84.2013 4.30162 1
 -4 6 -2 86.5776 3.86874 13
 -4 6 -2 85.9197 2.96665 6
 -4 6 -2 85.8252 3.94992 1
 -4 6 -2 87.5759 3.60117 23
 4 -6 2 89.5074 4.32709 1
 4 -6 2 86.7551 2.57059 22
 4 -6 2 85.0326 4.35636 23
 4 -6 2 87.5971 3.97251 1
 4 -6 2 84.1578 4.30096 14
 -5 6 -2 32.234 2.4678 6
 -5 6 -2 26.2879 2.5122 23
 -5 6 -2 33.5652 3.57589 1
 -5 6 -2 31.5934 3.2945 1
 -5 6 -2 31.2048 3.0104 13
 5 -6 2 30.0443 3.01906 23
 5 -6 2 32.5728 3.4299 1
 5 -6 2 29.1395 3.39058 1
 5 -6 2 33.2862 3.51425 14
 -6 6 -2 2.89448 2.0354 13
 -6 6 -2 3.75564 1.47308 5
 -6 6 -2 6.82276 2.50312 1
 -6 6 -2 1.63102 2.2957 1
 6 -6 2 3.15745 2.26063 1
 6 -6 2 3.32174 2.6112 23
 6 -6 2 1.52998 2.21977 14
 6 -6 2 4.4423 2.34432 1
 -7 6 -2 34.453 4.52055 13
 -7 6 -2 27.1339 3.5457 1
 -7 6 -2 26.4719 2.46675 5
 -7 6 -2 27.9502 3.27208 1
 7 -6 2 30.1533 3.46143 14
 7 -6 2 36.1389 4.11738 1
 7 -6 2 25.8873 3.59332 23
 7 -6 2 39.897 3.36838 1
 -8 6 -2 3.22751 3.39329 13
 -8 6 -2 6.44221 3.08803 1
 -8 6 -2 0.45218 2.51553 1
 8 -6 2 2.08506 3.40129 14
 8 -6 2 6.52591 3.09461 1
 8 -6 2 4.07255 2.70926 1
 8 -6 2 6.067 3.34989 23
 8 5 -2 1.24986 2.70133 24
 8 5 -2 0.44869 3.22358 11
 8 5 -2 -0.287 2.41419 5
 -8 -5 2 0.26702 3.21496 14
 -8 -5 2 -2.7164 4.33136 4
 -8 -5 2 -4.6962 4.77939 21
 -8 -5 2 -6.0968 2.95319 1
 -8 -5 2 -1.6704 3.08387 20
 7 5 -2 9.97476 2.7177 11
 7 5 -2 15.0717 2.91083 1
 7 5 -2 9.26928 2.89725 24
 7 5 -2 4.46065 2.45409 1
 -7 -5 2 2.16966 2.62636 1
 -7 -5 2 10.3584 3.30851 21
 -7 -5 2 13.7623 2.41505 20
 -7 -5 2 8.95178 2.55892 14
 6 5 -2 29.0511 3.65188 1
 6 5 -2 14.1614 2.14964 24
 6 5 -2 9.325 2.49431 1
 6 5 -2 17.5272 2.41074 11
 -6 -5 2 14.9299 2.26909 20
 -6 -5 2 18.4977 2.65292 8
 -6 -5 2 14.0286 2.13782 14
 -6 -5 2 17.8196 2.65645 21
 -6 -5 2 13.8577 2.89479 1
 5 5 -2 1.55792 1.66603 11
 5 5 -2 2.68666 2.11869 1
 5 5 -2 0.73363 1.50066 24
 -5 -5 2 0.90091 1.68632 23
 -5 -5 2 0.39596 1.41962 14
 -5 -5 2 -1.4221 1.99776 1
 -5 -5 2 2.02078 1.70512 20
 -5 -5 2 0.83159 1.70209 21
 -5 -5 2 0.19622 1.77568 8
 4 5 -2 52.1576 3.55407 1
 4 5 -2 47.9958 2.36412 24
 4 5 -2 46.5179 2.76498 11
 -4 -5 2 52.6566 2.60829 14
 -4 -5 2 49.4622 3.33792 8
 -4 -5 2 47.5899 2.74683 21
 -4 -5 2 46.4005 3.45323 1
 -4 -5 2 49.534 2.67834 20
 -4 -5 2 53.4115 2.85863 23
 3 5 -2 5.74509 1.29971 24
 3 5 -2 5.17621 1.53539 1
 3 5 -2 5.19524 1.31153 11
 -3 -5 2 4.99512 1.12603 21
 -3 -5 2 2.27353 1.74343 1
 -3 -5 2 4.42202 1.28249 20
 -3 -5 2 5.16416 1.08614 14
 -3 -5 2 4.20754 1.6996 13
 2 5 -2 0.06769 0.94964 21
 2 5 -2 -0.1776 1.01751 24
 2 5 -2 1.22607 1.55353 1
 -2 -5 2 1.06926 1.11781 11
 -2 -5 2 -0.0077 0.95876 20
 -2 -5 2 -0.4319 1.32637 1
 -2 -5 2 0.31262 1.55546 13
 -2 -5 2 1.25923 0.93669 21
 -2 -5 2 1.05596 0.3953 18
 1 5 -2 470.057 12.6979 1
 1 5 -2 481.378 12.3029 3
 1 5 -2 475.93 12.1576 21
 1 5 -2 502.112 12.1883 24
 -1 -5 2 491.271 12.7358 1
 -1 -5 2 494.615 12.4599 11
 -1 -5 2 480.974 12.6142 23
 -1 -5 2 485.943 12.7856 13
 -1 -5 2 503.309 12.2704 20
 -1 -5 2 487.344 12.172 21
 0 5 -2 47.3373 2.79487 1
 0 5 -2 48.0771 2.45881 23
 0 5 -2 45.367 2.33017 21
 0 5 -2 45.7445 2.39809 13
 0 5 -2 49.316 1.80722 19
 0 5 -2 44.2585 2.10596 24
 0 -5 2 50.4246 2.17999 20
 0 -5 2 46.7482 2.73339 1
 0 -5 2 47.8781 2.74649 13
 0 -5 2 44.4108 2.76968 1
 0 -5 2 48.0124 2.41493 23
 0 -5 2 43.6632 2.2745 21
 0 -5 2 46.1174 2.43795 3
 -1 5 -2 409.635 11.018 13
 -1 5 -2 427.092 10.7834 7
 -1 5 -2 420.569 11.1701 1
 -1 5 -2 434.108 11.2299 1
 -1 5 -2 428.97 11.0518 23
 -1 5 -2 428.141 10.7091 24
 1 -5 2 432.842 11.1535 23
 1 -5 2 417.178 11.1207 13
 1 -5 2 443.465 10.7961 20
 1 -5 2 424.62 11.2367 1
 1 -5 2 417.342 11.146 1
 1 -5 2 421.16 10.3141 19
 -2 5 -2 143.529 4.68111 1
 -2 5 -2 137.205 4.25655 24
 -2 5 -2 148.602 4.61987 23
 -2 5 -2 145.099 4.65962 13
 -2 5 -2 140.435 4.89305 1
 2 -5 2 143.231 4.67795 23
 2 -5 2 141.756 3.92933 19
 2 -5 2 143.402 4.87944 1
 2 -5 2 143.212 4.67919 13
 2 -5 2 146.483 3.83827 22
 2 -5 2 144.68 4.37569 7
 2 -5 2 135.477 4.79802 14
 2 -5 2 142.977 4.72161 1
 2 -5 2 140.025 4.21429 20
 -3 5 -2 175.686 4.52705 6
 -3 5 -2 166.359 5.73524 1
 -3 5 -2 172.201 5.4105 13
 -3 5 -2 169.946 4.82647 10
 -3 5 -2 175.487 5.751 1
 -3 5 -2 168.806 5.35468 23
 3 -5 2 170.557 5.39005 13
 3 -5 2 152.433 4.36671 22
 3 -5 2 176.438 5.80148 1
 3 -5 2 163.249 5.68628 1
 3 -5 2 163.828 5.45233 14
 3 -5 2 171.168 4.12154 16
 3 -5 2 176.229 5.77339 23
 -4 5 -2 78.3483 4.01259 1
 -4 5 -2 85.7815 3.45473 23
 -4 5 -2 83.0214 4.04705 1
 -4 5 -2 76.178 3.56927 13
 4 -5 2 72.7516 2.36982 4
 4 -5 2 86.7902 4.07531 1
 4 -5 2 85.5102 4.12053 23
 4 -5 2 83.1591 4.14121 1
 4 -5 2 81.0587 4.04556 14
 -5 5 -2 4.63354 1.73609 1
 -5 5 -2 1.90478 1.73299 13
 -5 5 -2 2.82956 1.49661 23
 -5 5 -2 2.68309 1.9024 1
 5 -5 2 3.13701 2.02497 14
 5 -5 2 5.26742 1.70085 1
 5 -5 2 -0.9922 2.17748 23
 5 -5 2 3.62931 1.9413 1
 -6 5 -2 4.58996 2.32038 1
 -6 5 -2 3.87811 2.10321 13
 -6 5 -2 5.11244 1.928 1
 6 -5 2 7.51221 2.53136 1
 6 -5 2 6.36968 1.98355 1
 6 -5 2 2.89757 2.62789 23
 6 -5 2 4.68122 2.12217 14
 -7 5 -2 10.6988 2.70591 13
 -7 5 -2 9.17614 3.01762 1
 -7 5 -2 12.3759 2.703 1
 7 -5 2 13.5076 2.96232 1
 7 -5 2 11.4304 2.95035 14
 7 -5 2 12.6113 3.23034 23
 7 -5 2 14.0386 2.86572 1
 -8 5 -2 14.3568 3.71985 13
 -8 5 -2 11.5474 2.95837 1
 -8 5 -2 6.9023 2.89571 1
 8 -5 2 13.477 3.18566 1
 8 -5 2 14.6984 3.67609 23
 8 -5 2 15.0047 3.67389 14
 8 -5 2 7.86495 2.39505 8
 8 -5 2 13.095 2.94108 1
 8 4 -2 22.6629 3.76535 11
 8 4 -2 12.3207 3.1351 1
 8 4 -2 22.7411 3.52563 24
 8 4 -2 35.4521 4.38672 1
 8 4 -2 20.6092 2.28078 5
 -8 -4 2 21.703 3.39521 20
 -8 -4 2 19.6771 3.37677 1
 -8 -4 2 26.5253 3.60663 14
 -8 -4 2 22.9181 4.70645 21
 -8 -4 2 23.5481 4.35553 4
 7 4 -2 8.50011 2.73462 11
 7 4 -2 3.03685 2.30488 1
 7 4 -2 8.62305 2.8208 24
 7 4 -2 10.0498 2.851 1
 7 4 -2 10.4176 1.28482 18
 -7 -4 2 11.2587 3.26766 21
 -7 -4 2 10.4411 2.387 20
 -7 -4 2 4.26126 2.44846 1
 -7 -4 2 8.70101 2.48547 14
 6 4 -2 65.0857 4.22446 1
 6 4 -2 61.9702 3.30826 24
 6 4 -2 63.7972 4.49154 1
 6 4 -2 57.2174 3.78698 11
 -6 -4 2 62.9551 3.61826 14
 -6 -4 2 59.2299 4.21538 21
 -6 -4 2 59.8103 3.49127 20
 -6 -4 2 63.6623 4.40662 1
 5 4 -2 28.8707 3.2151 1
 5 4 -2 25.2542 2.76999 11
 5 4 -2 20.2117 1.09342 18
 5 4 -2 25.2775 2.6259 1
 5 4 -2 25.6154 2.24277 24
 -5 -4 2 26.6543 3.30348 1
 -5 -4 2 26.7871 2.39039 14
 -5 -4 2 28.447 2.97255 8
 -5 -4 2 24.6722 2.35784 20
 -5 -4 2 24.3037 2.45318 23
 -5 -4 2 25.8243 2.71958 21
 4 4 -2 7.67209 1.51698 11
 4 4 -2 7.17555 1.93982 1
 4 4 -2 8.19796 1.42239 24
 -4 -4 2 7.95085 1.38157 21
 -4 -4 2 6.76881 1.43808 20
 -4 -4 2 6.30517 1.20805 14
 -4 -4 2 5.64675 1.59264 8
 -4 -4 2 4.3826 1.88304 1
 -4 -4 2 8.5444 1.42802 23
 3 4 -2 89.0293 3.21377 24
 3 4 -2 91.6996 2.47089 15
 3 4 -2 95.4393 3.999 1
 3 4 -2 93.3483 2.46581 9
 3 4 -2 93.7872 3.41859 11
 -3 -4 2 93.0649 3.25517 20
 -3 -4 2 93.093 3.04498 14
 -3 -4 2 94.7627 3.90851 8
 -3 -4 2 94.7655 3.67018 23
 -3 -4 2 93.4287 3.91874 1
 -3 -4 2 96.9786 3.14958 21
 2 4 -2 52.6115 2.0918 21
 2 4 -2 53.8035 2.19583 24
 2 4 -2 55.1399 2.87989 1
 2 4 -2 50.299 2.4637 11
 -2 -4 2 53.486 2.21841 20
 -2 -4 2 56.1783 2.84921 1
 -2 -4 2 54.3993 1.4071 18
 -2 -4 2 50.8032 2.91054 13
 -2 -4 2 51.4085 2.09178 21
 1 4 -2 15.5809 1.41339 24
 1 4 -2 16.4758 1.73694 3
 1 4 -2 15.8412 1.45672 21
 1 4 -2 15.8501 2.03174 1
 1 4 -2 20.3146 2.2164 13
 -1 -4 2 17.2065 1.0622 24
 -1 -4 2 18.0189 2.16978 13
 -1 -4 2 18.4444 1.56369 21
 -1 -4 2 18.4367 1.92206 23
 -1 -4 2 20.1049 1.74961 11
 -1 -4 2 17.939 1.45012 20
 -1 -4 2 15.8044 2.01009 1
 0 4 -2 352.545 9.41751 1
 0 4 -2 349.778 9.31391 13
 0 4 -2 355.612 9.04649 21
 0 4 -2 371.339 8.82915 19
 0 4 -2 352.419 8.96776 24
 0 4 -2 351.36 9.41459 1
 0 4 -2 368.458 9.31227 23
 0 -4 2 350.447 9.25615 3
 0 -4 2 345.19 9.40814 1
 0 -4 2 372.389 9.05802 20
 0 -4 2 365.305 8.94282 24
 0 -4 2 354.746 9.41258 13
 0 -4 2 344.946 9.38679 1
 0 -4 2 360.712 9.34332 23
 -1 4 -2 165.013 4.96566 1
 -1 4 -2 159.543 4.99252 1
 -1 4 -2 163.06 4.74183 7
 -1 4 -2 170.535 4.84676 23
 -1 4 -2 171.653 4.56288 24
 -1 4 -2 160.299 4.92854 13
 1 -4 2 161.838 4.86872 14
 1 -4 2 166.903 4.27456 19
 1 -4 2 168.702 4.58435 20
 1 -4 2 157.238 4.8968 23
 1 -4 2 165.532 4.98055 1
 1 -4 2 160.12 4.93061 13
 1 -4 2 165.808 4.99458 1
 1 -4 2 159.088 4.39049 24
 1 -4 2 163.697 4.67392 7
 -2 4 -2 62.0012 2.68865 1
 -2 4 -2 59.1774 2.89621 1
 -2 4 -2 62.7099 2.67099 23
 -2 4 -2 60.4946 2.39021 10
 -2 4 -2 61.5478 2.9001 13
 2 -4 2 54.9943 1.899 22
 2 -4 2 64.3294 3.00107 1
 2 -4 2 63.1809 2.81982 13
 2 -4 2 64.4509 2.59661 7
 2 -4 2 57.5457 2.62478 1
 2 -4 2 63.3603 2.88854 23
 2 -4 2 61.2916 2.66872 14
 2 -4 2 61.0414 1.6324 16
 -3 4 -2 194.762 5.78787 23
 -3 4 -2 188.177 6.07613 1
 -3 4 -2 187.692 4.88101 22
 -3 4 -2 196.07 6.0759 1
 -3 4 -2 189.935 4.60183 17
 -3 4 -2 198.069 5.82412 13
 3 -4 2 188.505 6.04636 1
 3 -4 2 195.68 6.06586 14
 3 -4 2 185.87 4.7502 4
 3 -4 2 170.767 4.82686 22
 3 -4 2 195.636 6.14215 1
 -4 4 -2 102.527 4.48723 1
 -4 4 -2 97.7608 3.15389 22
 -4 4 -2 106.381 4.08312 13
 -4 4 -2 109.88 4.01276 23
 -4 4 -2 104.525 4.40786 1
 4 -4 2 105.908 4.50035 1
 4 -4 2 100.475 4.34653 14
 4 -4 2 110.251 4.56043 1
 4 -4 2 96.107 4.16355 23
 -5 4 -2 50.1315 1.71683 16
 -5 4 -2 47.4722 2.5249 5
 -5 4 -2 51.6099 3.24858 13
 -5 4 -2 59.9377 2.94797 23
 -5 4 -2 56.5066 3.83099 1
 -5 4 -2 53.1463 3.66723 1
 5 -4 2 47.3692 3.64037 1
 5 -4 2 49.1813 3.77103 23
 5 -4 2 49.2133 2.79033 10
 5 -4 2 52.6073 3.70657 1
 5 -4 2 51.3202 3.61133 14
 -6 4 -2 203.124 7.6595 1
 -6 4 -2 215.768 7.38887 13
 -6 4 -2 210.689 5.56244 16
 -6 4 -2 215.998 7.86115 1
 6 -4 2 199.094 7.68029 1
 6 -4 2 229.845 7.71239 14
 6 -4 2 210.486 7.59317 23
 6 -4 2 223.689 6.65629 10
 6 -4 2 227.627 7.92242 1
 -7 4 -2 3.07279 2.64977 1
 -7 4 -2 -3.3751 2.17324 1
 -7 4 -2 1.84125 2.55764 13
 -7 4 -2 3.56413 1.34451 16
 7 -4 2 -2.5214 2.00121 1
 7 -4 2 5.54398 2.57556 14
 7 -4 2 3.6473 2.20285 10
 7 -4 2 7.39763 2.93379 23
 7 -4 2 2.04634 2.51645 1
 -8 4 -2 12.149 3.47893 13
 -8 4 -2 11.7159 2.80397 1
 -8 4 -2 11.5864 1.77502 16
 -8 4 -2 11.2648 3.02381 1
 8 -4 2 11.4335 3.62479 23
 8 -4 2 12.5464 3.48428 14
 8 -4 2 9.04785 2.85407 10
 8 -4 2 19.8134 3.25111 1
 8 -4 2 11.1511 1.88501 8
 8 -4 2 8.94545 2.84002 1
 8 3 -2 2.70805 2.93262 24
 8 3 -2 -0.5115 2.67925 1
 8 3 -2 4.13192 2.77418 1
 -8 -3 2 3.99171 4.19523 21
 -8 -3 2 4.39817 3.03792 20
 -8 -3 2 -2.5498 2.64263 1
 -8 -3 2 5.3518 3.46329 4
 7 3 -2 3.19077 1.40442 5
 7 3 -2 5.44557 2.52034 24
 7 3 -2 0.28911 2.45188 1
 7 3 -2 0.86869 2.08764 1
 -7 -3 2 1.6529 2.74769 21
 -7 -3 2 5.50607 2.11186 20
 -7 -3 2 5.1034 2.28677 14
 -7 -3 2 5.86317 2.99782 4
 -7 -3 2 0.87957 2.29078 1
 6 3 -2 142.3 4.9729 24
 6 3 -2 142.166 5.94125 1
 6 3 -2 130.222 5.9198 1
 -6 -3 2 147.289 6.14119 1
 -6 -3 2 140.3 5.32214 21
 -6 -3 2 136.501 5.12918 14
 -6 -3 2 137.905 5.12937 20
 5 3 -2 3.5071 1.61748 1
 5 3 -2 1.62065 1.84198 1
 5 3 -2 7.04867 1.55277 24
 -5 -3 2 -1.4953 1.33256 23
 -5 -3 2 2.26396 1.38023 14
 -5 -3 2 0.51644 1.45622 20
 -5 -3 2 3.55883 1.47755 21
 -5 -3 2 3.99101 2.01398 1
 4 3 -2 519.755 13.5064 24
 4 3 -2 543.106 14.2745 1
 4 3 -2 523.529 14.2426 1
 -4 -3 2 548.674 14.1176 23
 -4 -3 2 532.495 14.2777 1
 -4 -3 2 558.378 13.4136 21
 -4 -3 2 509.189 13.5825 20
 -4 -3 2 532.219 13.3591 14
 -4 -3 2 538.46 13.9422 8
 3 3 -2 41.5482 1.32263 18
 3 3 -2 42.8167 2.06437 24
 3 3 -2 44.5243 2.77274 1
 3 3 -2 39.1446 2.3572 11
 -3 -3 2 41.7685 2.04014 20
 -3 -3 2 41.7088 1.85932 14
 -3 -3 2 41.6651 2.70401 1
 -3 -3 2 46.1764 2.72357 8
 -3 -3 2 40.3653 1.9797 21
 -3 -3 2 45.0825 2.42479 23
 2 3 -2 176.451 5.38562 1
 2 3 -2 174.098 5.11211 11
 2 3 -2 181.686 4.91435 24
 -2 -3 2 192.775 4.41815 18
 -2 -3 2 176.131 4.69927 21
 -2 -3 2 186.281 4.9612 20
 -2 -3 2 180.926 5.42175 13
 -2 -3 2 176.778 5.39171 1
 -2 -3 2 182.194 4.66698 14
 1 3 -2 309.708 7.77848 21
 1 3 -2 319.284 8.36859 13
 1 3 -2 308.306 8.24006 1
 1 3 -2 318.466 7.89898 24
 -1 -3 2 325.131 7.86405 24
 -1 -3 2 333.921 7.94954 20
 -1 -3 2 310.594 8.25186 1
 -1 -3 2 316.96 8.36703 13
 -1 -3 2 312.852 8.1747 11
 -1 -3 2 307.359 7.78849 21
 0 3 -2 656.066 16.1132 1
 0 3 -2 671.398 15.7633 19
 0 3 -2 642.804 16.0714 13
 0 3 -2 623.724 15.7694 21
 0 3 -2 673.837 16.0413 23
 0 3 -2 680.826 15.8033 24
 0 3 -2 634.434 15.5025 12
 0 3 -2 639.839 16.0977 1
 0 -3 2 685.941 15.7948 24
 0 -3 2 646.987 16.1338 3
 0 -3 2 649.407 16.1163 1
 0 -3 2 656.858 16.0341 23
 0 -3 2 639.86 16.0859 1
 0 -3 2 681.697 15.7695 19
 0 -3 2 676.524 15.852 20
 0 -3 2 644.265 16.1206 13
 -1 3 -2 169.687 4.54873 23
 -1 3 -2 163.896 4.33194 24
 -1 3 -2 158.336 4.68808 1
 -1 3 -2 160.05 4.72807 13
 -1 3 -2 157.647 4.70746 1
 1 -3 2 159.721 4.58452 7
 1 -3 2 162.923 4.26702 19
 1 -3 2 159.325 4.6479 23
 1 -3 2 154.681 4.68307 14
 1 -3 2 157.066 4.72703 1
 1 -3 2 169.351 4.3807 20
 1 -3 2 162.022 4.25209 24
 1 -3 2 159.159 4.75325 13
 1 -3 2 153.907 4.68358 1
 1 -3 2 164.47 4.17021 22
 -2 3 -2 586.145 14.792 10
 -2 3 -2 608.221 15.101 13
 -2 3 -2 610.721 14.3415 17
 -2 3 -2 605.297 15.1866 14
 -2 3 -2 611.626 14.4799 22
 -2 3 -2 594.29 15.2126 1
 -2 3 -2 596.384 15.19 1
 -2 3 -2 584.188 15.0492 23
 2 -3 2 600.718 15.1696 14
 2 -3 2 597.141 15.1989 1
 2 -3 2 600.249 15.2314 1
 2 -3 2 599.618 15.1285 23
 2 -3 2 639.792 14.8247 24
 2 -3 2 630.69 14.49 22
 -3 3 -2 0.94562 1.35659 14
 -3 3 -2 -1.7718 1.17339 13
 -3 3 -2 1.23537 1.02198 23
 -3 3 -2 0.27731 1.50045 1
 -3 3 -2 0.33424 0.78203 22
 -3 3 -2 0.14966 0.20606 16
 -3 3 -2 -0.8318 1.35261 1
 3 -3 2 0.86971 1.155 23
 3 -3 2 0.52331 0.64028 22
 3 -3 2 -0.4706 1.05879 14
 3 -3 2 0.11762 1.44928 1
 3 -3 2 -1.9155 1.35625 1
 3 -3 2 -1.721 0.97048 10
 -4 3 -2 207.275 6.31219 13
 -4 3 -2 198.188 5.73967 5
 -4 3 -2 204.324 6.43543 14
 -4 3 -2 206.158 5.12711 16
 -4 3 -2 204.474 6.68716 1
 -4 3 -2 209.052 6.72265 1
 -4 3 -2 216.749 6.40507 23
 4 -3 2 203.614 6.66155 1
 4 -3 2 202.641 6.58672 14
 4 -3 2 209.1 6.68774 23
 4 -3 2 208.848 5.98749 10
 4 -3 2 208.699 6.77546 1
 -5 3 -2 262.394 8.39986 1
 -5 3 -2 263.249 7.89404 23
 -5 3 -2 266.015 7.94607 13
 -5 3 -2 248.267 6.98359 5
 -5 3 -2 265.294 8.37611 1
 -5 3 -2 251.976 6.5697 16
 -5 3 -2 265.481 8.20849 14
 5 -3 2 259.143 8.1407 14
 5 -3 2 265.191 8.43611 1
 5 -3 2 253.841 8.31835 23
 5 -3 2 258.074 8.32936 1
 5 -3 2 264.267 7.48154 10
 -6 3 -2 0.15238 1.14516 16
 -6 3 -2 -0.7359 2.04507 1
 -6 3 -2 2.67302 2.2311 13
 -6 3 -2 4.81122 2.31255 1
 -6 3 -2 4.39995 2.1982 14
 6 -3 2 3.24476 2.30853 1
 6 -3 2 1.79585 2.44437 23
 6 -3 2 1.96998 2.10358 14
 6 -3 2 -1.5781 2.07257 1
 6 -3 2 -0.4662 1.77326 10
 -7 3 -2 11.0668 1.68481 16
 -7 3 -2 8.98916 2.74598 1
 -7 3 -2 8.18671 2.66081 13
 -7 3 -2 12.9587 2.70155 14
 -7 3 -2 9.81372 2.16078 1
 7 -3 2 7.67327 2.65754 14
 7 -3 2 10.306 2.58717 10
 7 -3 2 9.26842 1.45484 8
 7 -3 2 13.2697 2.42116 1
 7 -3 2 12.5236 2.78007 1
 7 -3 2 14.7092 3.05179 23
 -8 3 -2 7.23709 2.03128 16
 -8 3 -2 8.22071 2.85213 1
 -8 3 -2 3.15496 3.27346 13
 8 -3 2 8.13161 3.43435 23
 8 -3 2 4.97467 3.19641 14
 8 -3 2 5.45773 2.66464 1
 8 -3 2 6.09201 3.04157 10
 8 -3 2 10.0276 2.61083 1
 8 2 -2 0.57728 2.91152 14
 8 2 -2 -0.7636 2.88782 1
 8 2 -2 -4.1607 2.22827 1
 -8 -2 2 -0.7696 2.62569 1
 -8 -2 2 -1.0207 3.47474 4
 -8 -2 2 -2.3393 2.50615 16
 7 2 -2 17.4064 2.8686 1
 7 2 -2 19.1852 2.63422 14
 7 2 -2 20.814 2.8362 1
 -7 -2 2 20.0548 2.95613 1
 -7 -2 2 17.9239 2.49607 20
 -7 -2 2 19.48 3.05797 4
 -7 -2 2 22.1172 2.73712 14
 6 2 -2 23.2848 2.34163 14
 6 2 -2 21.8173 1.88167 5
 6 2 -2 23.0346 2.79493 1
 6 2 -2 23.2528 2.91487 1
 -6 -2 2 26.1548 2.50102 20
 -6 -2 2 24.4319 2.92722 14
 -6 -2 2 25.3047 3.07985 4
 -6 -2 2 23.834 2.86108 1
 5 2 -2 52.2152 2.9362 14
 5 2 -2 59.0294 3.6786 1
 5 2 -2 48.7131 3.51992 1
 -5 -2 2 55.0984 3.62796 1
 -5 -2 2 52.4389 2.78813 20
 -5 -2 2 52.1722 2.9347 14
 -5 -2 2 52.8637 2.91639 23
 4 2 -2 1271.24 32.0811 1
 4 2 -2 1276.19 31.362 14
 4 2 -2 1336.08 32.2332 1
 -4 -2 2 1327.5 32.2247 1
 -4 -2 2 1354.47 32.0855 23
 -4 -2 2 1289.53 31.5897 20
 -4 -2 2 1291.35 31.3804 14
 -4 -2 2 1313 31.8511 8
 3 2 -2 23.4381 1.49301 14
 3 2 -2 24.7548 2.3145 1
 -3 -2 2 24.8501 2.0662 8
 -3 -2 2 25.2378 2.01704 23
 -3 -2 2 24.3964 1.67115 20
 -3 -2 2 26.5015 2.31521 1
 -3 -2 2 25.2768 1.51574 14
 2 2 -2 7.18475 0.98229 24
 2 2 -2 6.49659 1.16268 11
 2 2 -2 6.69249 0.61112 18
 2 2 -2 5.61476 1.31034 1
 -2 -2 2 8.03896 0.9152 20
 -2 -2 2 6.95956 1.28555 1
 -2 -2 2 7.15859 0.81748 14
 -2 -2 2 4.77493 1.33038 8
 -2 -2 2 6.34016 1.21823 23
 -2 -2 2 9.28651 0.98085 21
 -2 -2 2 7.07877 1.1688 13
 1 2 -2 21.7948 1.01096 20
 1 2 -2 19.0829 1.65502 11
 1 2 -2 19.2153 0.86953 21
 1 2 -2 21.3226 1.54257 1
 1 2 -2 23.0229 1.13389 24
 1 2 -2 20.275 1.01964 2
 1 2 -2 23.8256 1.7169 13
 1 2 -2 20.5811 0.88402 18
 -1 -2 2 21.9416 0.93244 21
 -1 -2 2 22.0689 1.02593 24
 -1 -2 2 22.0669 0.94036 18
 -1 -2 2 21.9176 1.72707 13
 -1 -2 2 19.4466 1.64238 11
 -1 -2 2 22.8008 1.13648 20
 -1 -2 2 21.3341 1.66107 1
 0 2 -2 0.33885 0.51749 20
 0 2 -2 2.56457 0.68055 14
 0 2 -2 1.02175 0.60119 24
 0 2 -2 0.71749 0.91374 13
 0 2 -2 0.60811 0.78222 1
 0 2 -2 1.30775 1.14101 3
 0 2 -2 0.36886 0.85598 1
 0 2 -2 -0.5991 0.72087 23
 0 2 -2 0.07053 0.70542 19
 0 -2 2 2.14196 0.6453 24
 0 -2 2 -0.0701 0.94047 13
 0 -2 2 0.34338 0.56239 6
 0 -2 2 -0.2565 0.78454 1
 0 -2 2 0.88647 0.8318 1
 0 -2 2 1.06513 0.71735 14
 0 -2 2 1.14267 1.09993 3
 0 -2 2 0.22641 0.8507 23
 0 -2 2 0.9212 0.73392 19
 0 -2 2 0.90668 0.65988 20
 -1 2 -2 1126.19 26.8929 13
 -1 2 -2 1094.58 26.4316 17
 -1 2 -2 1106.69 26.8314 14
 -1 2 -2 1080.86 26.7471 10
 -1 2 -2 1092.7 26.8074 1
 -1 2 -2 1149.02 26.5044 22
 -1 2 -2 1146.78 26.7633 23
 -1 2 -2 1105.16 26.7936 1
 1 -2 2 1107.76 26.8221 1
 1 -2 2 1136.96 26.5048 22
 1 -2 2 1154.46 26.4478 17
 1 -2 2 1104.56 26.82 14
 1 -2 2 1110.05 26.8572 13
 1 -2 2 1125.14 26.3007 16
 1 -2 2 1138.14 26.7849 23
 1 -2 2 1124.43 26.9004 7
 1 -2 2 1095.65 26.7993 1
 1 -2 2 1150.18 26.5631 24
 -2 2 -2 49.9616 1.35225 17
 -2 2 -2 51.1053 2.49769 1
 -2 2 -2 47.808 2.37831 13
 -2 2 -2 52.4682 1.24703 16
 -2 2 -2 49.7158 2.55356 14
 -2 2 -2 52.4831 2.15066 23
 -2 2 -2 47.4777 2.51122 1
 -2 2 -2 48.1464 1.62703 22
 2 -2 2 51.3353 1.64356 22
 2 -2 2 50.2656 2.53488 1
 2 -2 2 46.3671 2.42066 23
 2 -2 2 49.0812 2.48558 1
 2 -2 2 49.7724 2.2275 10
 2 -2 2 48.9322 2.5555 14
 -3 2 -2 215.698 6.11667 23
 -3 2 -2 211.23 6.27438 14
 -3 2 -2 213.83 6.3735 1
 -3 2 -2 209.141 6.32413 1
 -3 2 -2 209.082 5.68744 5
 3 -2 2 210.722 6.38696 1
 3 -2 2 199.304 6.06916 14
 3 -2 2 197.692 6.1723 23
 3 -2 2 207.665 6.30779 1
 3 -2 2 206.044 5.82655 10
 -4 2 -2 37.6383 2.9586 1
 -4 2 -2 38.3725 2.9877 1
 -4 2 -2 32.0332 2.21636 23
 -4 2 -2 35.2239 2.00705 5
 -4 2 -2 37.0042 2.89306 14
 4 -2 2 32.319 2.87901 1
 4 -2 2 35.3256 2.59266 23
 4 -2 2 39.7251 2.85202 14
 4 -2 2 34.5604 2.51356 10
 4 -2 2 37.1249 3.0196 1
 -5 2 -2 30.9558 3.21825 1
 -5 2 -2 34.7305 3.34065 1
 -5 2 -2 34.9285 3.14594 14
 -5 2 -2 26.6145 2.33076 23
 5 -2 2 36.9804 2.82139 10
 5 -2 2 31.8641 3.27576 1
 5 -2 2 32.5709 3.09298 14
 5 -2 2 33.0224 3.2915 1
 5 -2 2 36.3447 3.38102 23
 -6 2 -2 42.097 3.95677 1
 -6 2 -2 50.2057 3.87851 1
 -6 2 -2 49.1413 2.52072 16
 -6 2 -2 44.8392 3.88619 14
 6 -2 2 53.6356 3.76328 23
 6 -2 2 49.5471 3.85177 14
 6 -2 2 48.7787 3.92896 1
 6 -2 2 46.5662 2.07711 8
 6 -2 2 54.2736 3.5776 10
 6 -2 2 46.7448 4.04988 1
 -7 2 -2 33.702 2.64074 16
 -7 2 -2 29.7685 3.98171 1
 -7 2 -2 34.9742 4.22165 14
 7 -2 2 36.6933 4.1673 10
 7 -2 2 35.8974 4.46181 23
 7 -2 2 40.8583 3.47976 1
 7 -2 2 36.7537 3.94852 1
 7 -2 2 43.8918 4.2787 14
 -8 2 -2 4.072 2.72601 1
 -8 2 -2 0.77005 3.206 14
 -8 2 -2 2.63224 2.10783 16
 8 -2 2 0.09119 3.18594 10
 8 -2 2 -1.3346 2.5436 1
 8 -2 2 -1.9143 3.36059 14
 8 -2 2 1.09687 3.13602 23
 8 -2 2 4.22294 2.17074 1
 9 1 -2 -6.7631 2.98067 1
 9 1 -2 0.90719 3.99362 14
 9 1 -2 -1.5727 3.16426 1
 -9 -1 2 -3.4097 3.3599 1
 -9 -1 2 -3.1678 4.02962 4
 -9 -1 2 1.48373 3.0089 16
 8 1 -2 14.4391 3.27996 14
 8 1 -2 13.5392 3.17522 1
 8 1 -2 17.585 3.1074 1
 -8 -1 2 14.2316 2.89609 16
 -8 -1 2 16.5077 3.46091 4
 -8 -1 2 13.8163 2.92002 1
 7 1 -2 11.273 3.07359 23
 7 1 -2 13.9 2.45692 14
 7 1 -2 14.1671 2.85948 1
 7 1 -2 14.4591 2.73144 1
 -7 -1 2 13.7472 2.77874 1
 -7 -1 2 13.115 2.91976 4
 -7 -1 2 17.0014 2.52801 16
 6 1 -2 1.06604 2.27908 23
 6 1 -2 2.26935 2.20577 1
 6 1 -2 1.60415 1.73626 14
 6 1 -2 0.9 1.89329 1
 -6 -1 2 5.69488 1.73873 23
 -6 -1 2 3.78299 1.7404 20
 -6 -1 2 0.98583 2.15306 4
 -6 -1 2 0.94181 1.97644 1
 -6 -1 2 5.31553 1.7163 14
 5 1 -2 132.85 4.87602 8
 5 1 -2 131.927 5.32786 23
 5 1 -2 140.445 4.72019 14
 5 1 -2 145.397 5.4803 1
 5 1 -2 144.918 5.52507 1
 -5 -1 2 143.828 5.37131 4
 -5 -1 2 140.528 4.68255 20
 -5 -1 2 133.093 4.89236 23
 -5 -1 2 143.273 5.46755 1
 -5 -1 2 139.825 4.75805 14
 4 1 -2 242.764 7.13001 8
 4 1 -2 236.651 6.72817 14
 4 1 -2 248.243 7.4612 1
 4 1 -2 246.727 7.40766 1
 -4 -1 2 248.831 6.77097 14
 -4 -1 2 256.078 7.24327 23
 -4 -1 2 248.203 7.4455 1
 -4 -1 2 250.145 6.82394 20
 -4 -1 2 243.071 7.33773 4
 3 1 -2 185.827 5.0147 14
 3 1 -2 189.385 5.66857 1
 3 1 -2 181.021 5.494 8
 3 1 -2 189.027 5.63443 1
 3 1 -2 187.208 5.55636 23
 -3 -1 2 181.849 4.58817 9
 -3 -1 2 183.361 5.64143 1
 -3 -1 2 185.503 5.69229 4
 -3 -1 2 183.407 4.60576 15
 -3 -1 2 192.813 5.53388 23
 -3 -1 2 188.438 5.04587 14
 -3 -1 2 189.568 5.16746 20
 2 1 -2 2108.61 49.1506 1
 2 1 -2 2040.48 49.2256 8
 2 1 -2 2094.06 49.0851 23
 2 1 -2 2051.98 49.1221 1
 2 1 -2 1964.09 49.2905 14
 -2 -1 2 2113.91 49.1503 1
 -2 -1 2 2082.9 48.8936 17
 -2 -1 2 2108.93 49.2497 8
 -2 -1 2 2138.99 49.0962 23
 -2 -1 2 2002.06 48.8427 20
 1 1 -2 54.6948 2.37729 8
 1 1 -2 55.7754 2.28487 11
 1 1 -2 56.6852 1.69082 18
 1 1 -2 54.8813 1.94611 1
 1 1 -2 58.7348 1.64699 20
 1 1 -2 56.5474 1.68062 24
 1 1 -2 57.5145 1.99284 13
 -1 -1 2 58.742 2.00159 1
 -1 -1 2 58.165 2.39749 8
 -1 -1 2 57.0836 1.96374 17
 -1 -1 2 56.2511 1.94563 2
 -1 -1 2 61.6787 1.71582 20
 -1 -1 2 56.4461 2.39254 4
 -1 -1 2 57.1123 1.93042 13
 -1 -1 2 57.1715 1.72495 18
 0 1 -2 39.7549 1.48336 6
 0 1 -2 41.5308 1.58321 19
 0 1 -2 43.2937 1.17407 20
 0 1 -2 42.1917 1.29873 22
 0 1 -2 40.2959 1.43591 14
 0 1 -2 38.6738 1.79343 11
 0 1 -2 41.4405 1.95207 3
 0 1 -2 43.0653 1.3098 16
 0 1 -2 38.5873 1.6444 13
 0 1 -2 41.7646 1.3418 1
 0 1 -2 41.3948 1.32626 1
 0 1 -2 40.6964 1.67139 7
 0 1 -2 43.6851 1.17423 24
 0 1 -2 40.8204 1.60122 4
 0 1 -2 42.7016 1.28936 23
 0 -1 2 44.0625 1.46696 22
 0 -1 2 42.2919 1.72301 4
 0 -1 2 42.8385 1.33098 16
 0 -1 2 43.3128 1.80277 8
 0 -1 2 42.8102 1.45226 19
 0 -1 2 39.2967 1.71052 13
 0 -1 2 40.9287 1.4597 18
 0 -1 2 41.2686 1.44215 17
 0 -1 2 40.2577 1.84592 7
 0 -1 2 44.0653 1.74228 3
 0 -1 2 43.3753 1.18505 24
 0 -1 2 39.9908 1.47896 14
 0 -1 2 41.9083 1.31931 23
 0 -1 2 40.2636 1.5999 11
 0 -1 2 40.5801 1.34677 1
 0 -1 2 44.5489 1.21292 20
 0 -1 2 41.213 1.36882 1
 -1 1 -2 239.296 5.88032 4
 -1 1 -2 237.502 6.23072 1
 -1 1 -2 242.124 5.89257 17
 -1 1 -2 247.63 6.17875 23
 -1 1 -2 241.958 6.29395 14
 -1 1 -2 235.606 6.29162 10
 -1 1 -2 236.676 6.24042 1
 -1 1 -2 244.05 5.98428 22
 -1 1 -2 247.985 5.81487 16
 1 -1 2 244.924 6.00283 22
 1 -1 2 254.946 5.83146 16
 1 -1 2 241.736 6.3234 10
 1 -1 2 229.691 6.34482 14
 1 -1 2 233.928 6.22175 1
 1 -1 2 243.358 6.26659 1
 1 -1 2 238.535 6.2001 23
 1 -1 2 251.831 5.91107 17
 -2 1 -2 9.34694 1.38829 14
 -2 1 -2 8.67687 1.10481 5
 -2 1 -2 9.81565 1.08956 23
 -2 1 -2 9.05536 1.36707 1
 -2 1 -2 10.9798 0.98596 22
 -2 1 -2 9.58323 1.36488 1
 2 -1 2 10.9952 0.70099 17
 2 -1 2 7.98324 1.34619 23
 2 -1 2 9.04376 1.40118 14
 2 -1 2 10.1688 0.93988 22
 2 -1 2 7.78197 1.14111 1
 2 -1 2 10.5006 1.25321 10
 2 -1 2 9.29531 1.3695 1
 -3 1 -2 33.0715 1.86959 5
 -3 1 -2 35.1834 2.17038 23
 -3 1 -2 33.5167 2.48216 14
 -3 1 -2 34.8423 2.52116 1
 -3 1 -2 32.4548 2.52734 1
 3 -1 2 31.9888 2.41274 23
 3 -1 2 34.708 2.601 1
 3 -1 2 31.0278 2.46983 14
 3 -1 2 32.7359 2.50349 1
 -4 1 -2 49.7288 3.16581 1
 -4 1 -2 52.8238 3.08477 14
 -4 1 -2 49.5846 2.59791 23
 -4 1 -2 46.0815 3.20618 1
 4 -1 2 50.6326 1.58901 8
 4 -1 2 49.3519 3.2539 1
 4 -1 2 55.6902 3.33853 1
 4 -1 2 54.8248 3.30729 23
 4 -1 2 48.5877 2.96291 14
 -5 1 -2 20.707 2.54495 1
 -5 1 -2 19.5432 2.56015 1
 -5 1 -2 19.8899 1.86535 4
 -5 1 -2 17.6454 1.88774 23
 -5 1 -2 19.4154 2.28085 14
 5 -1 2 22.3109 2.81885 14
 5 -1 2 20.6499 2.59978 1
 5 -1 2 19.6742 2.57566 1
 5 -1 2 18.3488 2.52482 23
 -6 1 -2 66.8593 4.48235 14
 -6 1 -2 64.8204 3.17386 4
 -6 1 -2 72.3376 4.43441 1
 6 -1 2 78.1685 4.38723 14
 6 -1 2 69.5822 4.5095 1
 6 -1 2 66.7414 4.3324 1
 6 -1 2 66.7634 4.59029 23
 -7 1 -2 0.49642 2.61117 14
 -7 1 -2 2.45768 1.68159 4
 -7 1 -2 5.97891 2.59587 1
 7 -1 2 -0.0358 2.045 1
 7 -1 2 -0.1403 2.57986 14
 7 -1 2 7.83874 2.37835 1
 7 -1 2 5.31175 3.05746 23
 -8 1 -2 9.20713 2.92518 1
 -8 1 -2 15.839 3.74115 14
 -8 1 -2 12.7227 2.47821 16
 8 -1 2 14.0377 3.67532 23
 8 -1 2 15.7783 3.64745 10
 8 -1 2 18.5579 3.83211 14
 8 -1 2 20.1126 2.98958 1
 8 -1 2 14.0142 2.95249 1
 9 0 -2 7.06571 3.45795 1
 9 0 -2 11.0321 4.27676 14
 9 0 -2 5.2545 3.26306 1
 -9 0 2 8.67564 2.95988 16
 -9 0 2 3.21718 3.42225 1
 -9 0 2 8.89567 3.84989 4
 8 0 -2 5.97448 3.26941 23
 8 0 -2 11.3057 3.22222 14
 8 0 -2 11.2642 3.16032 1
 8 0 -2 8.64679 2.52266 1
 -8 0 2 6.13693 2.37916 16
 -8 0 2 7.45719 2.79456 1
 -8 0 2 6.21306 3.17083 4
 7 0 -2 0.02891 2.16379 1
 7 0 -2 0.52606 2.31363 1
 7 0 -2 -0.3638 2.12227 14
 7 0 -2 -0.4655 2.56386 23
 -7 0 2 1.82443 1.95103 16
 -7 0 2 2.11104 2.32206 1
 -7 0 2 1.98616 2.28948 4
 6 0 -2 38.1008 3.78573 23
 6 0 -2 45.1357 3.80636 1
 6 0 -2 39.2226 3.35351 8
 6 0 -2 42.7485 3.52959 1
 6 0 -2 41.0104 3.30053 14
 -6 0 2 43.0148 3.63356 1
 -6 0 2 44.0617 2.98065 23
 -6 0 2 44.2326 3.57921 4
 -6 0 2 39.3122 2.65682 16
 5 0 -2 65.8066 3.34207 1
 5 0 -2 61.0227 3.70267 23
 5 0 -2 56.1617 3.23443 8
 5 0 -2 62.4089 3.64595 1
 5 0 -2 63.5297 3.18841 14
 -5 0 2 61.1952 2.74358 16
 -5 0 2 64.8037 3.67964 1
 -5 0 2 61.2464 2.91676 20
 -5 0 2 60.5588 3.36671 4
 -5 0 2 69.2994 3.23214 23
 4 0 -2 268.875 7.89988 1
 4 0 -2 258.061 7.59055 8
 4 0 -2 268.368 7.87633 1
 4 0 -2 261.198 7.26856 14
 -4 0 2 279.608 7.69491 23
 -4 0 2 267.863 7.30217 20
 -4 0 2 275.582 7.20882 16
 -4 0 2 277.782 7.77969 4
 -4 0 2 266.69 7.86835 1
 3 0 -2 731.292 18.1705 1
 3 0 -2 716.5 18.1794 1
 3 0 -2 709.889 17.7292 14
 3 0 -2 708.198 18.0802 23
 3 0 -2 717.597 18.1123 8
 -3 0 2 739.3 18.208 4
 -3 0 2 730.871 18.1891 1
 -3 0 2 740.608 17.7741 20
 -3 0 2 725.622 17.6183 17
 -3 0 2 756.687 18.0919 23
 -3 0 2 773.05 17.7979 16
 -3 0 2 721.005 18.1603 1
 2 0 -2 2947.03 73.2374 8
 2 0 -2 2978.63 73.2699 4
 2 0 -2 3039.11 73.3288 1
 2 0 -2 2936.25 73.015 14
 2 0 -2 3115.18 73.0632 23
 2 0 -2 3075.96 73.3648 1
 -2 0 2 3029.88 73.0172 1
 -2 0 2 3040.54 73.4795 1
 -2 0 2 3209.42 71.9577 17
 -2 0 2 3162.39 72.3595 4
 -2 0 2 3118.1 71.9202 20
 -2 0 2 3216.28 72.134 23
 -2 0 2 2899.24 71.9729 16
 1 0 -2 91.239 2.48845 23
 1 0 -2 89.2369 2.67884 9
 1 0 -2 98.9249 2.56939 16
 1 0 -2 93.9839 2.34439 20
 1 0 -2 89.6649 2.76591 15
 1 0 -2 89.7647 2.44265 21
 1 0 -2 90.3858 2.52146 1
 1 0 -2 89.2397 3.01947 4
 1 0 -2 88.1088 3.04368 8
 1 0 -2 87.7122 2.37176 13
 1 0 -2 89.7906 2.53137 1
 1 0 -2 88.126 2.87483 6
 1 0 -2 94.1445 2.42274 22
 1 0 -2 93.7008 2.7262 19
 -1 0 2 92.1122 2.4782 23
 -1 0 2 91.9519 2.60117 16
 -1 0 2 91.9374 2.59408 18
 -1 0 2 92.1625 2.35287 20
 -1 0 2 88.5129 2.38151 13
 -1 0 2 92.1818 2.54152 1
 -1 0 2 91.445 2.8864 12
 -1 0 2 87.972 2.5141 1
 -1 0 2 86.0444 2.45141 21
 -1 0 2 92.6773 2.48962 22
 -1 0 2 83.7788 2.84747 6
 -1 0 2 86.9561 2.74434 15
 -1 0 2 94.7096 2.62917 17
 -1 0 2 87.695 2.72332 9
 -1 0 2 88.4848 2.9885 4
 -1 0 2 94.245 2.93155 2
 0 0 -2 632.406 15.4646 8
 0 0 -2 653.399 15.096 20
 0 0 -2 631.76 15.5275 7
 0 0 -2 654.018 15.2852 16
 0 0 -2 632.784 15.5325 9
 0 0 -2 627.521 15.4653 5
 0 0 -2 633.691 15.2712 23
 0 0 -2 638.869 15.5474 3
 0 0 -2 632.973 15.3263 21
 0 0 -2 638.028 15.3981 14
 0 0 -2 638.327 15.5572 15
 0 0 -2 632.071 15.4823 10
 0 0 -2 654.136 15.2956 22
 0 0 -2 670.932 15.4189 19
 0 0 -2 629.361 15.4285 11
 0 0 -2 606.185 15.2194 1
 0 0 2 654.72 15.4258 19
 0 0 2 638.297 15.54 7
 0 0 2 631.384 15.4308 11
 0 0 2 658.789 15.3556 18
 0 0 2 623.894 15.4907 10
 0 0 2 663.993 15.2996 16
 0 0 2 661.539 15.3458 17
 0 0 2 634.143 15.5317 3
 0 0 2 645.813 15.4958 5
 0 0 2 662.915 15.3093 22
 0 0 2 669.362 15.1002 20
 -1 0 -2 227.854 5.80482 23
 -1 0 -2 221.372 5.85764 1
 -1 0 -2 219.448 5.55051 8
 -1 0 -2 235.111 5.5875 16
 -1 0 -2 225.334 5.96027 5
 -1 0 -2 225.589 5.94152 14
 -1 0 -2 231.673 5.67186 22
 -1 0 -2 231.475 5.62624 20
 -1 0 -2 219.667 5.83945 1
 1 0 2 235.916 5.62962 17
 1 0 2 219.357 5.86467 1
 1 0 2 217.901 5.80885 23
 1 0 2 224.726 5.62307 20
 1 0 2 233.935 5.68881 22
 1 0 2 222.031 5.85932 1
 1 0 2 230.717 5.70719 18
 1 0 2 224.816 5.96071 5
 1 0 2 222.656 6.0262 14
 1 0 2 222.775 6.04962 10
 -2 0 -2 501.258 12.9016 1
 -2 0 -2 512.551 12.8527 1
 -2 0 -2 500.304 12.6674 5
 -2 0 -2 522.914 12.55 20
 -2 0 -2 520.634 12.9157 14
 -2 0 -2 539.021 12.8496 23
 2 0 2 500.42 12.891 1
 2 0 2 502.708 12.8647 1
 2 0 2 504.85 12.8531 14
 2 0 2 522.389 12.6981 5
 2 0 2 508.121 12.8382 23
 -3 0 -2 25.0842 2.35955 1
 -3 0 -2 17.2951 2.22493 14
 -3 0 -2 21.8865 1.64637 20
 -3 0 -2 17.6828 1.82189 23
 3 0 2 19.0692 2.23426 14
 3 0 2 19.0145 2.16264 23
 3 0 2 19.4675 1.74442 5
 3 0 2 15.4518 1.86099 1
 3 0 2 19.2576 2.35117 1
 -4 0 -2 1.65812 1.09865 23
 -4 0 -2 2.56016 0.97131 20
 -4 0 -2 -0.7985 1.44164 1
 -4 0 -2 -1.0089 1.41776 14
 4 0 2 0.1185 1.28766 14
 4 0 2 -0.7066 1.66282 1
 4 0 2 -1.1882 1.69725 23
 4 0 2 -1.2976 1.53231 1
 4 0 2 1.63883 1.04879 5
 -5 0 -2 5.81166 2.03298 1
 -5 0 -2 13.5498 1.80262 20
 -5 0 -2 11.5631 2.00999 14
 -5 0 -2 18.3859 2.11037 23
 5 0 2 11.0071 1.98622 14
 5 0 2 9.9702 2.31312 23
 5 0 2 11.8542 2.28459 1
 5 0 2 10.1293 2.12231 1
 -6 0 -2 8.85369 2.42162 1
 -6 0 -2 7.836 2.32236 14
 -6 0 -2 8.21059 1.82243 4
 6 0 2 2.30703 2.6269 23
 6 0 2 6.34214 2.21251 14
 6 0 2 7.91055 2.42326 1
 6 0 2 8.63374 2.42446 1
 -7 0 -2 -2.9125 2.125 1
 -7 0 -2 -0.5981 1.95045 4
 -7 0 -2 -5.1304 2.58876 14
 7 0 2 5.69737 2.64906 1
 7 0 2 -2.2941 2.40598 14
 7 0 2 -2.2971 2.66125 23
 7 0 2 1.48354 2.15004 1
 -8 0 -2 6.10346 2.75341 1
 -8 0 -2 4.29843 2.72695 15
 -8 0 -2 9.38519 2.6673 4
 -8 0 -2 6.59721 2.58682 9
 -8 0 -2 11.0295 3.72537 14
 8 0 2 13.4672 3.57985 23
 8 0 2 4.95094 2.62791 1
 8 0 2 7.3369 3.6089 14
 9 -1 -2 8.27528 4.4459 14
 9 -1 -2 12.5036 3.29217 1
 9 -1 -2 6.77469 3.45295 1
 9 -1 -2 0.36082 3.53369 23
 -9 1 2 2.09655 2.79648 16
 -9 1 2 10.8105 3.39533 1
 8 -1 -2 7.45269 3.35756 23
 8 -1 -2 5.29418 2.36572 1
 8 -1 -2 13.1056 3.16623 1
 8 -1 -2 8.03457 3.18014 14
 -8 1 2 8.02584 2.59505 1
 -8 1 2 7.94215 2.37481 16
 7 -1 -2 42.2067 4.36286 23
 7 -1 -2 42.7918 4.12634 14
 7 -1 -2 58.5834 4.35195 1
 7 -1 -2 43.1383 3.84527 1
 7 -1 -2 43.0952 4.03338 8
 -7 1 2 32.1936 3.88493 1
 -7 1 2 46.5285 3.84591 4
 -7 1 2 46.9883 3.34404 16
 6 -1 -2 5.18586 1.94798 8
 6 -1 -2 4.58254 1.68103 1
 6 -1 -2 3.05631 1.9797 14
 6 -1 -2 5.07713 2.3201 1
 6 -1 -2 4.08494 2.33247 23
 -6 1 2 4.80138 1.81468 1
 -6 1 2 2.90945 1.7467 23
 -6 1 2 3.16414 1.69735 16
 -6 1 2 3.59108 1.99205 4
 5 -1 -2 117.113 4.7781 1
 5 -1 -2 104.426 4.36792 8
 5 -1 -2 109.387 4.18582 14
 5 -1 -2 120.057 4.85553 1
 5 -1 -2 109.885 4.74309 23
 -5 1 2 117.729 4.56557 4
 -5 1 2 111.317 3.78356 16
 -5 1 2 111.126 4.79262 1
 -5 1 2 119.183 4.79349 1
 -5 1 2 118.763 4.39177 23
 4 -1 -2 238.925 7.0772 1
 4 -1 -2 239.184 7.1568 1
 4 -1 -2 232.415 6.73551 14
 -4 1 2 240.748 6.43222 16
 -4 1 2 237.699 7.02688 1
 -4 1 2 241.754 6.23636 17
 -4 1 2 238.89 7.17345 1
 -4 1 2 239.927 6.95314 23
 -4 1 2 244.833 7.03668 4
 3 -1 -2 75.4269 3.12103 1
 3 -1 -2 78.7616 3.09598 4
 3 -1 -2 71.9343 2.77787 14
 3 -1 -2 78.8701 3.1953 1
 3 -1 -2 75.7479 3.06863 23
 -3 1 2 76.4097 2.44132 17
 -3 1 2 79.6921 2.98389 23
 -3 1 2 74.35 3.20316 4
 -3 1 2 79.3095 3.17445 1
 -3 1 2 75.9362 3.16075 1
 -3 1 2 76.48 2.54054 16
 2 -1 -2 1.40129 0.99809 1
 2 -1 -2 1.02113 1.05661 1
 2 -1 -2 -1.8093 0.94868 23
 2 -1 -2 -1.1548 1.10424 4
 -2 1 2 -0.4804 0.66706 17
 -2 1 2 1.92333 0.93546 21
 -2 1 2 -0.009 0.76615 16
 -2 1 2 -1.5461 0.94576 23
 -2 1 2 2.06402 1.12787 6
 -2 1 2 0.255 0.98826 1
 -2 1 2 1.9915 1.03428 1
 1 -1 -2 1.07642 1.09146 12
 1 -1 -2 1.40972 0.45797 22
 1 -1 -2 1.48795 0.76926 19
 1 -1 -2 1.10138 0.71052 10
 1 -1 -2 1.34792 0.79705 6
 1 -1 -2 0.53028 0.7868 21
 1 -1 -2 1.33457 0.67947 1
 1 -1 -2 1.02552 0.63593 1
 1 -1 -2 1.59783 0.48199 24
 1 -1 -2 0.65757 0.62969 23
 -1 1 2 1.92689 0.75046 16
 -1 1 2 1.31252 0.67317 1
 -1 1 2 2.38061 0.81615 19
 -1 1 2 2.01374 1.04449 12
 -1 1 2 0.34892 0.97211 6
 -1 1 2 1.12201 0.66148 1
 -1 1 2 1.22314 0.6889 17
 -1 1 2 3.13074 0.90361 18
 -1 1 2 1.71542 0.63488 23
 -1 1 2 1.58849 0.55251 22
 -1 1 2 0.13303 0.80403 21
 -1 1 2 1.11885 0.78983 5
 0 -1 -2 492.798 12.0829 21
 0 -1 -2 485.685 12.0701 3
 0 -1 -2 518.904 12.0496 19
 0 -1 -2 512.893 11.9567 22
 0 -1 -2 526.336 11.8304 20
 0 -1 -2 486.772 12.2924 15
 0 -1 -2 482.666 11.936 1
 0 -1 -2 484.309 12.233 2
 0 -1 -2 482.145 11.9741 16
 0 -1 -2 484.998 12.2594 9
 0 -1 -2 518.627 11.8062 24
 0 1 2 482.622 12.083 21
 0 1 2 525.8 11.8423 20
 0 1 2 514.642 11.9724 22
 0 1 2 480.293 12.2071 9
 0 1 2 518.9 12.0016 16
 0 1 2 503.689 12.0178 18
 0 1 2 508.512 11.8185 24
 0 1 2 462.941 12.2015 2
 0 1 2 510.03 12.0659 19
 0 1 2 478.88 11.9471 1
 0 1 2 478.207 12.1749 10
 0 1 2 503.194 12.2291 5
 0 1 2 492.55 12.1473 7
 0 1 2 474.498 12.269 15
 0 1 2 524.206 12.0585 17
 -1 -1 -2 1378.48 32.5858 23
 -1 -1 -2 1323.39 32.6904 9
 -1 -1 -2 1400.58 32.666 21
 -1 -1 -2 1359.06 32.6264 1
 -1 -1 -2 1408.73 32.4219 20
 -1 -1 -2 1358.47 32.7247 14
 -1 -1 -2 1355.21 32.7433 15
 1 1 2 1332.53 32.6196 1
 1 1 2 1406.12 32.4271 18
 1 1 2 1373.55 32.7258 5
 1 1 2 1274.85 32.7926 11
 1 1 2 1346.27 32.7091 14
 1 1 2 1496.47 32.462 20
 -2 -1 -2 96.1455 3.43863 1
 -2 -1 -2 95.0626 3.26235 23
 -2 -1 -2 92.8765 3.13452 9
 -2 -1 -2 91.8849 2.91434 20
 -2 -1 -2 91.3378 3.38686 14
 2 1 2 94.4416 3.21542 5
 2 1 2 91.817 3.32533 23
 2 1 2 91.6824 3.4468 1
 2 1 2 95.0399 3.44367 1
 2 1 2 90.9223 3.40322 14
 2 1 2 97.5835 2.77183 18
 -3 -1 -2 56.2973 2.67685 23
 -3 -1 -2 52.2451 2.86407 14
 -3 -1 -2 56.4296 2.96107 1
 -3 -1 -2 51.6188 2.1371 20
 3 1 2 57.8418 3.06761 1
 3 1 2 52.7838 2.89916 14
 3 1 2 54.8756 2.56717 5
 3 1 2 54.5564 3.00276 1
 3 1 2 51.4582 2.85794 23
 -4 -1 -2 33.4486 2.1268 20
 -4 -1 -2 32.3246 2.66998 14
 -4 -1 -2 27.1194 2.80991 1
 -4 -1 -2 38.6919 2.25568 23
 4 1 2 31.2757 2.21877 5
 4 1 2 31.9508 2.60396 14
 4 1 2 29.3979 2.87463 1
 4 1 2 25.043 2.86938 23
 4 1 2 27.9767 2.92814 1
 -5 -1 -2 7.83887 1.47925 23
 -5 -1 -2 8.9593 2.24364 1
 -5 -1 -2 8.96153 1.98864 14
 -5 -1 -2 8.51744 1.79368 20
 5 1 2 9.44765 2.02706 14
 5 1 2 10.2468 1.5557 5
 5 1 2 4.35027 2.15128 1
 5 1 2 9.77685 1.95424 1
 5 1 2 8.25366 2.33933 23
 -6 -1 -2 5.95584 1.79213 9
 -6 -1 -2 4.06731 2.21114 1
 -6 -1 -2 2.85245 1.74731 15
 -6 -1 -2 7.2618 2.04177 20
 -6 -1 -2 7.17101 2.34593 14
 6 1 2 8.66074 2.38079 1
 6 1 2 6.2173 2.25837 14
 6 1 2 8.43604 2.75686 23
 6 1 2 5.96383 2.27368 1
 -7 -1 -2 11.7936 3.0324 14
 -7 -1 -2 13.1477 2.58404 4
 -7 -1 -2 9.70817 2.20982 15
 -7 -1 -2 9.5854 2.09436 9
 -7 -1 -2 13.0548 2.69691 1
 7 1 2 14.9487 2.59444 1
 7 1 2 8.49188 2.43707 1
 7 1 2 12.1447 2.97585 14
 -8 -1 -2 -7.0373 3.26765 14
 -8 -1 -2 -0.2657 2.25826 9
 -8 -1 -2 0.69171 2.36495 15
 -8 -1 -2 -3.1084 2.73122 4
 -8 -1 -2 -4.4864 2.03198 1
 8 1 2 3.71942 2.17082 1
 8 1 2 3.68693 2.76331 1
 8 1 2 -2.9889 3.51819 14
 9 -2 -2 -1.1621 4.00512 14
 9 -2 -2 -9.1804 3.28589 23
 9 -2 -2 2.96624 3.11093 1
 9 -2 -2 4.32854 3.26558 1
 -9 2 2 -2.3023 2.67184 16
 -9 2 2 -1.6165 3.06987 13
 -9 2 2 1.7054 3.27421 1
 8 -2 -2 11.2951 2.77849 1
 8 -2 -2 8.00678 3.27447 14
 8 -2 -2 10.3147 3.03772 8
 8 -2 -2 18.6476 3.18637 1
 8 -2 -2 4.07587 3.21998 23
 -8 2 2 10.4714 2.42171 16
 -8 2 2 8.62327 2.47346 13
 -8 2 2 12.8908 3.06185 1
 7 -2 -2 0.03065 2.19499 8
 7 -2 -2 2.41579 2.61944 23
 7 -2 -2 -0.4309 2.35825 14
 7 -2 -2 -0.8668 2.15878 1
 7 -2 -2 2.96529 2.19768 1
 -7 2 2 2.63714 1.91344 1
 -7 2 2 -1.3754 2.33805 1
 -7 2 2 1.14394 1.78636 16
 6 -2 -2 4.40574 2.1926 1
 6 -2 -2 2.70749 1.88527 8
 6 -2 -2 3.87045 2.00152 1
 6 -2 -2 4.59903 1.89847 14
 6 -2 -2 3.64282 2.16564 23
 -6 2 2 1.84345 2.00674 1
 -6 2 2 3.47693 1.58676 16
 -6 2 2 5.18922 2.26803 1
 -6 2 2 2.56797 1.76361 23
 5 -2 -2 134.934 5.19219 1
 5 -2 -2 126.224 5.18402 23
 5 -2 -2 136.138 5.2512 1
 5 -2 -2 135.152 4.7898 14
 -5 2 2 136.017 4.27162 16
 -5 2 2 132.82 5.20497 1
 -5 2 2 135.37 4.83285 23
 -5 2 2 137.015 5.22692 1
 4 -2 -2 33.281 2.29473 4
 4 -2 -2 30.6465 2.32614 14
 4 -2 -2 33.5203 2.56789 1
 4 -2 -2 34.77 2.70428 1
 -4 2 2 35.7057 1.70394 17
 -4 2 2 33.6059 1.67958 13
 -4 2 2 36.2069 2.70747 1
 -4 2 2 33.4229 2.64033 1
 -4 2 2 33.8545 1.75403 16
 -4 2 2 28.948 2.22681 23
 3 -2 -2 82.3976 3.19214 23
 3 -2 -2 81.6843 3.33735 1
 3 -2 -2 81.649 3.34312 4
 3 -2 -2 82.5448 3.29923 1
 -3 2 2 81.5919 3.33114 1
 -3 2 2 81.4669 3.3307 1
 -3 2 2 81.2442 3.10191 23
 -3 2 2 85.0695 2.66385 16
 -3 2 2 81.7111 3.19013 6
 -3 2 2 83.1076 2.24726 5
 -3 2 2 82.7249 2.36545 13
 -3 2 2 86.9372 2.2011 22
 -3 2 2 81.8424 2.55978 17
 2 -2 -2 94.47 3.17524 23
 2 -2 -2 92.702 3.21164 6
 2 -2 -2 99.3634 2.48326 22
 2 -2 -2 96.8366 2.76605 24
 2 -2 -2 98.0993 3.35768 1
 2 -2 -2 95.9759 3.24445 1
 2 -2 -2 96.2423 2.59964 10
 -2 2 2 92.9788 3.25419 1
 -2 2 2 99.1154 3.26103 1
 -2 2 2 98.5477 2.81267 17
 -2 2 2 95.9837 3.23768 6
 -2 2 2 85.6637 2.81632 16
 -2 2 2 100.223 3.31318 21
 -2 2 2 99.4635 3.15851 23
 -2 2 2 100.479 2.49548 22
 1 -2 -2 250.429 6.22157 24
 1 -2 -2 249.645 6.63322 21
 1 -2 -2 253.77 6.52559 1
 1 -2 -2 260.848 6.29354 20
 1 -2 -2 246.794 6.26448 19
 1 -2 -2 253.539 6.16825 22
 1 -2 -2 245.523 6.6214 6
 1 -2 -2 242.93 6.70701 12
 1 -2 -2 246.754 6.46975 1
 1 -2 -2 248.267 6.43025 23
 -1 2 2 255.047 6.32609 19
 -1 2 2 259 6.26809 24
 -1 2 2 247.572 6.67747 12
 -1 2 2 243.692 6.62077 21
 -1 2 2 256.922 6.41565 17
 -1 2 2 253.045 6.53331 1
 -1 2 2 255.279 6.45235 23
 -1 2 2 251.355 6.53014 1
 -1 2 2 256.837 6.5392 18
 -1 2 2 249.416 6.33624 10
 -1 2 2 253.994 6.38785 16
 -1 2 2 255.904 6.18945 22
 0 -2 -2 61.842 1.97029 22
 0 -2 -2 63.2227 2.0671 3
 0 -2 -2 64.2784 2.51824 21
 0 -2 -2 70.3634 1.96428 24
 0 -2 -2 70.4358 2.01123 20
 0 -2 -2 63.5567 2.2993 1
 0 -2 -2 64.4797 2.59302 2
 0 -2 -2 64.3721 2.25107 23
 0 2 2 60.4716 2.5393 21
 0 2 2 69.0161 2.13942 18
 0 2 2 66.4739 2.59323 2
 0 2 2 67.8331 2.01956 20
 0 2 2 67.15 2.2152 19
 0 2 2 64.5428 2.6972 15
 0 2 2 64.9277 2.35378 1
 0 2 2 63.4061 2.6715 9
 0 2 2 67.5689 2.03587 24
 -1 -2 -2 618.776 16.8097 20
 -1 -2 -2 735.03 16.8182 24
 -1 -2 -2 704.821 17.2326 15
 -1 -2 -2 683.352 16.7835 11
 -1 -2 -2 705.949 17.1348 21
 -1 -2 -2 719.101 17.1599 1
 -1 -2 -2 711.484 17.2007 9
 1 2 2 699.276 17.1369 21
 1 2 2 729.53 16.818 18
 1 2 2 707.895 16.8291 24
 1 2 2 701.014 17.2083 15
 1 2 2 696.766 17.1595 1
 1 2 2 704.402 17.1794 9
 -2 -2 -2 96.6011 3.6156 1
 -2 -2 -2 95.7696 3.55521 14
 -2 -2 -2 96.6343 3.08874 20
 -2 -2 -2 100.834 3.49041 21
 -2 -2 -2 99.0431 3.40049 9
 -2 -2 -2 95.1265 3.32525 15
 -2 -2 -2 100.773 3.4404 23
 2 2 2 97.8414 3.06396 24
 2 2 2 97.6075 3.65745 1
 2 2 2 98.956 2.83277 18
 -3 -2 -2 84.1278 3.34049 23
 -3 -2 -2 81.0103 3.15964 15
 -3 -2 -2 83.5657 3.42497 1
 -3 -2 -2 83.2406 3.12304 9
 -3 -2 -2 80.4022 2.85455 20
 -3 -2 -2 86.6142 3.54897 14
 3 2 2 84.4844 3.66473 1
 3 2 2 84.6398 2.65545 18
 3 2 2 87.8231 3.38336 5
 3 2 2 81.9787 3.52169 14
 3 2 2 86.206 3.4482 1
 -4 -2 -2 7.21923 1.24161 23
 -4 -2 -2 6.24589 1.72511 14
 -4 -2 -2 5.74171 1.29984 15
 -4 -2 -2 2.75918 1.76136 1
 -4 -2 -2 3.54999 1.23966 9
 -4 -2 -2 3.99007 1.36082 20
 4 2 2 4.46247 1.39591 5
 4 2 2 4.817 1.84764 1
 4 2 2 6.02417 1.13352 18
 4 2 2 4.60113 1.84028 1
 4 2 2 5.26706 1.58682 14
 -5 -2 -2 25.0813 1.96766 20
 -5 -2 -2 19.7199 2.36375 9
 -5 -2 -2 27.0249 2.96623 14
 -5 -2 -2 27.0023 2.47689 15
 -5 -2 -2 30.9275 2.46263 23
 -5 -2 -2 23.7987 3.04117 1
 5 2 2 28.7093 3.13944 1
 5 2 2 20.4588 2.01189 18
 5 2 2 27.3894 2.71776 5
 5 2 2 25.8368 3.18666 1
 5 2 2 23.6852 2.9103 14
 -6 -2 -2 36.4183 2.99116 20
 -6 -2 -2 32.4796 3.6145 14
 -6 -2 -2 33.2638 2.99014 15
 -6 -2 -2 29.1881 3.58134 1
 -6 -2 -2 26.1801 2.75403 9
 6 2 2 25.2657 3.45447 1
 6 2 2 41.2801 3.86805 1
 6 2 2 32.7461 3.68048 14
 6 2 2 35.6172 2.71514 18
 6 2 2 37.7555 3.22039 5
 -7 -2 -2 2.30171 1.84311 9
 -7 -2 -2 1.06006 1.87684 15
 -7 -2 -2 4.98878 2.25124 20
 -7 -2 -2 -5.2038 2.03737 1
 -7 -2 -2 0.16473 2.63182 14
 7 2 2 0.40868 2.05409 18
 7 2 2 -1.229 2.64348 14
 7 2 2 1.23032 2.63852 1
 7 2 2 -0.491 2.12421 1
 -8 -2 -2 12.4637 2.86801 1
 -8 -2 -2 3.61797 3.26139 4
 -8 -2 -2 0.2848 3.70811 14
 8 2 2 2.36193 2.57579 1
 8 2 2 -2.895 2.76474 24
 8 2 2 8.6925 3.22618 1
 8 2 2 5.92398 2.7787 18
 8 2 2 -1.3431 3.59883 14
 9 -3 -2 -2.8841 2.47242 10
 9 -3 -2 1.47663 4.22948 14
 9 -3 -2 9.9049 3.39762 1
 9 -3 -2 -5.5717 3.37454 23
 9 -3 -2 2.87691 3.73413 8
 9 -3 -2 -1.8167 2.81363 1
 -9 3 2 -2.0349 2.61022 16
 -9 3 2 1.45345 4.05211 6
 -9 3 2 3.43039 3.28879 1
 -9 3 2 0.69807 2.95592 13
 8 -3 -2 0.3594 2.52048 1
 8 -3 -2 -1.1273 2.35713 1
 8 -3 -2 2.68307 3.03066 8
 8 -3 -2 0.22091 3.00454 23
 8 -3 -2 1.35046 3.03484 14
 -8 3 2 -3.1474 2.6748 1
 -8 3 2 1.36659 2.21227 16
 -8 3 2 -0.6451 2.2477 13
 -8 3 2 0.56214 1.28218 22
 7 -3 -2 1.01077 2.40859 23
 7 -3 -2 -1.3123 2.17985 8
 7 -3 -2 -5.3223 2.21074 1
 7 -3 -2 -2.5779 1.44422 1
 7 -3 -2 1.7772 2.27924 14
 -7 3 2 -0.0073 1.79029 16
 -7 3 2 0.60194 2.38703 1
 -7 3 2 -0.2529 0.99828 22
 -7 3 2 0.02685 1.45066 22
 -7 3 2 -1.525 1.63809 13
 6 -3 -2 6.60212 2.03944 14
 6 -3 -2 5.83845 1.99842 1
 6 -3 -2 8.47666 1.98983 1
 6 -3 -2 4.42535 2.3825 23
 -6 3 2 8.77565 1.50206 13
 -6 3 2 6.98499 1.93504 1
 -6 3 2 8.96049 0.88088 22
 -6 3 2 7.21364 1.07782 22
 -6 3 2 8.2313 1.64072 16
 -6 3 2 6.61541 2.2181 1
 5 -3 -2 50.0578 3.40288 1
 5 -3 -2 50.0326 3.13952 14
 5 -3 -2 48.7283 3.52053 23
 5 -3 -2 55.93 3.44307 1
 -5 3 2 51.2064 3.42723 1
 -5 3 2 50.0453 1.50649 22
 -5 3 2 48.0296 2.8448 23
 -5 3 2 51.8306 3.44615 1
 -5 3 2 50.8385 2.32463 13
 -5 3 2 50.4131 2.31736 16
 -5 3 2 50.6096 3.1392 6
 -5 3 2 50.868 2.14152 17
 4 -3 -2 -2.7997 1.55443 23
 4 -3 -2 0.35018 1.23523 4
 4 -3 -2 -1.5718 1.02936 1
 4 -3 -2 -0.8427 1.35823 14
 4 -3 -2 -0.4915 1.28654 1
 -4 3 2 0.23068 0.35648 5
 -4 3 2 -1.0572 0.75164 17
 -4 3 2 -0.1986 1.3596 1
 -4 3 2 -0.7922 1.14859 23
 -4 3 2 -0.5359 1.35264 1
 -4 3 2 0.46411 0.74152 13
 -4 3 2 0.10329 0.83747 16
 -4 3 2 0.70842 1.28648 6
 3 -3 -2 168.144 5.23206 23
 3 -3 -2 167.764 5.30484 1
 3 -3 -2 164.588 5.25883 4
 3 -3 -2 169.914 5.34571 1
 -3 3 2 169.624 5.29652 1
 -3 3 2 162.662 4.39881 13
 -3 3 2 164.504 5.32752 1
 -3 3 2 175.119 5.26297 21
 -3 3 2 175.873 5.17857 23
 -3 3 2 171.472 4.58494 17
 -3 3 2 175.73 4.68932 16
 -3 3 2 169.819 5.09732 6
 2 -3 -2 33.956 1.42072 24
 2 -3 -2 34.7544 2.03885 6
 2 -3 -2 35.684 1.47139 13
 2 -3 -2 36.6848 2.18551 1
 2 -3 -2 37.9257 1.1867 22
 2 -3 -2 37.5389 2.24888 21
 2 -3 -2 34.4981 2.04331 23
 2 -3 -2 39.059 1.55732 19
 2 -3 -2 34.2041 2.12087 1
 2 -3 -2 34.2139 1.63552 20
 -2 3 2 36.5863 2.26482 12
 -2 3 2 32.8722 2.13349 1
 -2 3 2 35.9755 2.30035 21
 -2 3 2 37.1223 2.13585 1
 -2 3 2 32.6869 1.55888 16
 -2 3 2 38.0965 2.01166 6
 -2 3 2 37.0878 1.94876 23
 -2 3 2 37.78 1.62513 17
 1 -3 -2 121.607 3.19051 19
 1 -3 -2 117.61 3.36635 20
 1 -3 -2 118.491 3.72253 1
 1 -3 -2 116.495 3.15029 22
 1 -3 -2 120.424 3.2774 24
 1 -3 -2 115.297 3.12372 7
 1 -3 -2 114.301 3.77797 12
 1 -3 -2 117.735 3.6477 23
 1 -3 -2 124.359 3.91063 21
 1 -3 -2 118.546 3.74764 1
 -1 3 2 116.852 3.90648 21
 -1 3 2 121.456 3.37033 24
 -1 3 2 122.802 3.77057 12
 -1 3 2 121.417 3.42776 16
 -1 3 2 119.998 3.7301 1
 -1 3 2 116.434 3.75092 1
 -1 3 2 121.474 3.23643 19
 -1 3 2 117.015 3.59287 23
 0 -3 -2 125.541 3.67827 20
 0 -3 -2 140.393 3.63137 24
 0 -3 -2 130.037 3.99839 23
 0 -3 -2 130.677 4.08816 1
 0 -3 -2 133.184 4.12879 2
 0 -3 -2 132.055 4.07078 1
 0 -3 -2 131.217 3.45517 3
 0 -3 -2 132.553 3.99351 21
 0 3 2 138.123 3.73057 18
 0 3 2 131.958 4.12174 1
 0 3 2 131.873 4.15952 21
 0 3 2 139.717 3.72728 24
 0 3 2 130.872 4.12358 2
 -1 -3 -2 9.71882 1.37659 1
 -1 -3 -2 6.91363 1.28431 21
 -1 -3 -2 8.91683 0.812 24
 -1 -3 -2 10.5647 1.06998 20
 -1 -3 -2 8.69972 1.20799 2
 1 3 2 9.45011 1.34243 15
 1 3 2 9.85894 1.06285 24
 1 3 2 9.73696 1.42253 1
 1 3 2 11.3092 0.95229 18
 1 3 2 8.3539 1.30684 9
 -2 -3 -2 212.638 6.19385 14
 -2 -3 -2 200.479 6.2459 1
 -2 -3 -2 215.903 6.08114 21
 -2 -3 -2 215.425 6.1057 23
 -2 -3 -2 215.526 5.78332 20
 2 3 2 208.596 6.29913 1
 2 3 2 207.143 5.98148 9
 2 3 2 214.309 5.44495 18
 2 3 2 208.722 5.71065 24
 2 3 2 212.804 6.05192 15
 -3 -3 -2 2.16051 1.32065 14
 -3 -3 -2 2.26731 1.14112 23
 -3 -3 -2 0.84626 1.13172 9
 -3 -3 -2 0.55597 1.07448 20
 -3 -3 -2 0.62041 1.20522 21
 -3 -3 -2 1.30202 1.10603 15
 -3 -3 -2 -1.1283 1.46713 1
 3 3 2 0.67316 1.53729 1
 3 3 2 1.26624 1.07167 24
 3 3 2 0.58916 0.80929 18
 -4 -3 -2 130.344 4.44751 20
 -4 -3 -2 134.338 4.36837 9
 -4 -3 -2 133.405 4.46424 15
 -4 -3 -2 135.429 4.91138 14
 -4 -3 -2 135.763 4.78228 21
 -4 -3 -2 127.17 3.84653 8
 -4 -3 -2 136.005 5.26354 1
 -4 -3 -2 134.556 4.75075 23
 4 3 2 127.735 5.24738 1
 4 3 2 137.673 5.30847 1
 4 3 2 132.128 3.89198 18
 4 3 2 132.671 4.65393 5
 4 3 2 128.33 4.36891 24
 -5 -3 -2 40.6239 2.75646 9
 -5 -3 -2 39.7966 3.62115 1
 -5 -3 -2 33.9564 3.33043 21
 -5 -3 -2 46.0532 2.90162 15
 -5 -3 -2 47.944 2.96072 23
 -5 -3 -2 45.2678 3.46864 14
 -5 -3 -2 40.7537 2.808 20
 5 3 2 38.9081 2.28604 18
 5 3 2 45.7681 3.64657 1
 5 3 2 39.4404 2.63501 24
 5 3 2 45.5597 3.7429 1
 5 3 2 48.3104 3.27281 5
 -6 -3 -2 5.49772 2.5407 14
 -6 -3 -2 5.85165 2.24478 1
 -6 -3 -2 1.26064 2.53673 21
 -6 -3 -2 2.94523 1.94767 20
 6 3 2 3.48013 1.66965 18
 6 3 2 4.01702 2.15831 1
 6 3 2 1.09785 1.73419 24
 6 3 2 1.9335 2.34136 1
 6 3 2 3.71297 1.9431 5
 -7 -3 -2 -0.2258 2.68975 14
 -7 -3 -2 -2.5996 3.87038 21
 -7 -3 -2 0.69562 2.07417 20
 -7 -3 -2 0.54485 2.30499 1
 7 3 2 -1.7677 2.33003 1
 7 3 2 0.92037 2.25444 5
 7 3 2 -1.3968 2.71398 24
 7 3 2 0.70635 1.98577 18
 7 3 2 -3.2956 2.42884 1
 -8 -3 -2 -0.8119 2.86177 1
 -8 -3 -2 8.71128 3.77538 14
 -8 -3 -2 4.84485 2.54423 20
 8 3 2 4.12934 3.1483 24
 8 3 2 7.39236 2.78561 1
 8 3 2 3.496 2.46434 18
 8 3 2 -2.7939 3.13426 1
 9 -4 -2 3.79422 3.66871 1
 9 -4 -2 5.05139 3.21505 1
 9 -4 -2 3.16085 3.42052 23
 9 -4 -2 4.6745 3.88247 8
 9 -4 -2 6.76315 4.35678 14
 -9 4 2 7.43521 2.83674 16
 -9 4 2 4.30848 4.05513 6
 -9 4 2 3.89527 2.78546 13
 -9 4 2 9.90791 3.55817 1
 8 -4 -2 1.7209 3.12241 23
 8 -4 -2 2.33398 2.64097 1
 8 -4 -2 -3.3396 2.94121 8
 8 -4 -2 0.11412 2.97742 14
 8 -4 -2 1.92055 2.76424 1
 8 -4 -2 -0.7717 1.08672 10
 -8 4 2 -1.3188 2.94298 6
 -8 4 2 -3.1003 2.49468 1
 -8 4 2 1.01662 2.09892 13
 -8 4 2 -0.363 2.18146 16
 -8 4 2 3.79448 2.81977 1
 7 -4 -2 6.31138 2.66324 14
 7 -4 -2 5.64582 1.00054 10
 7 -4 -2 8.25976 2.44973 1
 7 -4 -2 5.49962 2.78841 23
 7 -4 -2 4.16585 2.61115 1
 -7 4 2 2.67068 2.54873 1
 -7 4 2 6.40789 2.66486 6
 -7 4 2 7.92938 1.94999 16
 -7 4 2 5.8875 1.78928 13
 -7 4 2 5.80297 2.5727 1
 6 -4 -2 24.5163 2.80487 14
 6 -4 -2 25.0867 1.10066 10
 6 -4 -2 25.2725 3.13253 1
 6 -4 -2 23.9213 3.01984 23
 6 -4 -2 26.7756 3.44723 1
 -6 4 2 25.4388 3.0704 6
 -6 4 2 26.7332 3.41908 1
 -6 4 2 26.5582 2.43239 16
 -6 4 2 26.2282 3.11549 23
 -6 4 2 22.3413 2.86547 1
 -6 4 2 30.2379 2.27332 13
 5 -4 -2 0.92632 1.68337 14
 5 -4 -2 0.91014 1.59693 4
 5 -4 -2 1.50081 1.31497 1
 5 -4 -2 0.30853 1.61141 1
 5 -4 -2 -1.5369 1.86099 23
 -5 4 2 -1.3227 0.93785 13
 -5 4 2 -0.6857 0.95961 17
 -5 4 2 0.42184 1.76237 21
 -5 4 2 -1.1018 1.35134 23
 -5 4 2 1.08104 1.73032 1
 -5 4 2 -0.6836 1.59363 1
 -5 4 2 -1.4329 1.21755 16
 -5 4 2 -1.2317 1.49361 6
 4 -4 -2 27.9493 2.50368 4
 4 -4 -2 30.6183 2.60807 1
 4 -4 -2 26.0132 2.69146 23
 4 -4 -2 28.6072 2.66504 1
 4 -4 -2 23.9927 2.53044 14
 -4 4 2 27.227 2.24188 6
 -4 4 2 29.8344 1.69089 17
 -4 4 2 27.3463 2.65125 21
 -4 4 2 29.655 1.71876 16
 -4 4 2 28.4859 1.68396 13
 -4 4 2 25.601 2.19852 1
 -4 4 2 27.8278 2.13545 23
 -4 4 2 28.8794 2.73923 1
 3 -4 -2 181.85 5.66558 1
 3 -4 -2 179 5.56111 23
 3 -4 -2 177.842 5.63829 1
 3 -4 -2 179.451 4.80065 13
 -3 4 2 180.434 5.4308 23
 -3 4 2 180.136 4.91573 16
 -3 4 2 179.384 4.84557 13
 -3 4 2 185.244 4.91109 17
 -3 4 2 174.2 5.29831 6
 -3 4 2 178.653 5.65496 1
 -3 4 2 172.909 5.64725 1
 -3 4 2 173.652 5.56482 21
 2 -4 -2 47.6649 1.69904 19
 2 -4 -2 47.8104 2.40506 21
 2 -4 -2 48.6904 2.44823 6
 2 -4 -2 47.3675 2.02954 20
 2 -4 -2 48.5986 2.56434 1
 2 -4 -2 49.8315 2.56017 1
 2 -4 -2 48.6619 2.03174 13
 2 -4 -2 48.199 1.56316 22
 2 -4 -2 44.6489 2.42981 23
 -2 4 2 46.7572 2.57113 1
 -2 4 2 48.2325 1.9336 16
 -2 4 2 49.3781 2.31499 23
 -2 4 2 50.3645 2.03662 24
 -2 4 2 48.0387 2.57594 1
 -2 4 2 45.9466 1.60595 10
 -2 4 2 46.0727 1.93951 17
 -2 4 2 45.8473 2.73712 21
 -2 4 2 47.3204 2.48464 12
 1 -4 -2 177.935 5.09645 13
 1 -4 -2 170.218 5.11966 12
 1 -4 -2 175.419 5.34059 21
 1 -4 -2 174.016 5.28268 1
 1 -4 -2 179.368 5.21107 23
 1 -4 -2 187.446 4.87564 20
 1 -4 -2 171.314 5.27914 1
 1 -4 -2 167.508 4.68744 24
 -1 4 2 180.812 4.82418 24
 -1 4 2 179.273 4.51676 19
 -1 4 2 181.854 5.16122 23
 -1 4 2 176.604 5.30311 1
 -1 4 2 177.509 5.19139 12
 -1 4 2 170.986 5.27294 1
 0 -4 -2 380.668 10.0015 21
 0 -4 -2 377.196 9.99488 23
 0 -4 -2 399.23 9.69819 20
 0 -4 -2 388.155 10.1081 1
 0 -4 -2 374.502 9.55804 24
 0 -4 -2 383.195 10.0832 1
 0 4 2 390.907 10.0722 2
 0 4 2 390.091 10.1246 1
 0 4 2 373.511 9.62267 24
 -1 -4 -2 272.28 6.99466 20
 -1 -4 -2 265.889 7.31101 21
 -1 -4 -2 259.22 7.16398 2
 -1 -4 -2 269.044 7.46442 1
 1 4 2 266.938 7.41086 9
 1 4 2 276.49 6.79581 18
 1 4 2 265.307 6.944 24
 1 4 2 257.806 7.45566 1
 1 4 2 259.711 6.44226 3
 1 4 2 262.662 7.45899 15
 1 4 2 269.955 7.39997 21
 -2 -4 -2 302.617 8.15392 21
 -2 -4 -2 298.374 8.29063 14
 -2 -4 -2 292.056 8.39195 1
 -2 -4 -2 295.375 7.84199 20
 2 4 2 291.391 8.41804 1
 2 4 2 304.589 7.45082 18
 2 4 2 294.327 8.17571 21
 2 4 2 289.816 8.03152 9
 2 4 2 295.066 7.79537 24
 2 4 2 296.025 8.15876 15
 -3 -4 -2 34.4982 2.30281 23
 -3 -4 -2 38.7379 2.702 14
 -3 -4 -2 39.3918 2.14788 20
 -3 -4 -2 43.0454 2.67074 21
 -3 -4 -2 32.9276 2.48102 1
 3 4 2 41.9739 1.73427 18
 3 4 2 38.4463 2.1677 24
 3 4 2 39.2549 3.01605 1
 -4 -4 -2 194.63 6.37628 14
 -4 -4 -2 191.579 5.96255 20
 -4 -4 -2 197.053 6.27892 23
 -4 -4 -2 192.533 6.32762 21
 -4 -4 -2 200.723 6.76794 1
 4 4 2 192.813 5.21898 18
 4 4 2 185.78 5.83524 24
 4 4 2 190.405 6.69979 1
 -5 -4 -2 16.929 2.18556 20
 -5 -4 -2 14.0473 1.86001 8
 -5 -4 -2 14.7136 2.35442 14
 -5 -4 -2 17.7116 2.53792 21
 -5 -4 -2 14.194 2.58543 1
 5 4 2 14.3731 1.46621 18
 5 4 2 15.1436 2.3268 1
 5 4 2 15.8461 2.10066 24
 5 4 2 15.3451 1.19855 11
 5 4 2 17.4761 2.59817 1
 5 4 2 11.8718 2.05965 5
 -6 -4 -2 43.2159 3.96132 1
 -6 -4 -2 36.4617 3.7254 21
 -6 -4 -2 42.3697 3.25831 20
 -6 -4 -2 41.1118 4.50088 14
 6 4 2 42.0895 4.19185 1
 6 4 2 47.2495 4.00609 1
 6 4 2 34.752 2.07034 11
 6 4 2 33.4197 2.56156 18
 6 4 2 40.542 3.9127 5
 -7 -4 -2 8.95036 2.5699 1
 -7 -4 -2 10.6081 3.30402 14
 7 4 2 8.55007 2.78326 24
 7 4 2 12.9407 2.94324 5
 7 4 2 13.1254 2.3514 1
 7 4 2 8.06081 1.99652 18
 7 4 2 6.1371 2.28233 1
 7 4 2 10.3956 1.70635 11
 -8 -4 -2 2.79058 3.22496 20
 -8 -4 -2 -3.9466 3.98073 14
 -8 -4 -2 -3.7068 2.96696 1
 8 4 2 2.04669 3.12393 5
 8 4 2 1.05326 3.10385 24
 8 4 2 7.45798 3.27735 1
 8 4 2 2.41952 1.99144 11
 8 4 2 -0.2632 2.9865 1
 9 -5 -2 0.07058 4.51618 14
 9 -5 -2 -4.382 4.06048 8
 9 -5 -2 7.22138 3.44439 1
 9 -5 -2 3.02939 3.51975 23
 9 -5 -2 6.84789 3.59 1
 -9 5 2 4.27391 2.78362 13
 -9 5 2 0.209 4.10513 6
 -9 5 2 1.72891 2.75546 16
 -9 5 2 0.56085 3.31054 1
 -9 5 2 -3.7475 4.02009 21
 -9 5 2 1.73248 3.44869 1
 8 -5 -2 13.0328 2.81949 1
 8 -5 -2 10.6296 3.38755 23
 8 -5 -2 7.85567 2.95668 1
 8 -5 -2 2.85186 3.25898 14
 -8 5 2 3.84645 3.07986 6
 -8 5 2 6.54042 3.53904 21
 -8 5 2 8.17949 2.21644 13
 -8 5 2 6.9251 2.39847 16
 -8 5 2 5.71895 2.97262 1
 -8 5 2 3.4945 2.6005 1
 7 -5 -2 32.8413 4.09459 1
 7 -5 -2 37.5134 4.15302 14
 7 -5 -2 41.3497 3.86427 1
 7 -5 -2 26.0803 3.59086 23
 -7 5 2 29.983 2.93798 16
 -7 5 2 42.7441 3.9149 6
 -7 5 2 39.8949 4.74047 21
 -7 5 2 34.6191 4.1623 1
 -7 5 2 29.4323 3.77809 1
 -7 5 2 36.071 3.03433 13
 6 -5 -2 -1.0268 1.93523 1
 6 -5 -2 3.03236 2.4364 23
 6 -5 -2 -1.5155 1.86882 4
 6 -5 -2 -1.5121 1.86317 14
 6 -5 -2 0.25547 1.96281 1
 -6 5 2 -1.3526 1.27152 13
 -6 5 2 -1.4527 1.1498 17
 -6 5 2 1.38047 2.29887 21
 -6 5 2 0.54688 1.93268 1
 -6 5 2 -1.1868 1.83526 6
 -6 5 2 -0.0805 2.1661 1
 -6 5 2 1.40121 1.53659 16
 5 -5 -2 89.1933 4.5631 23
 5 -5 -2 100.126 4.5559 14
 5 -5 -2 101.071 4.61212 1
 5 -5 -2 92.8774 4.55149 1
 5 -5 -2 93.6826 4.28367 4
 -5 5 2 95.1849 4.48775 21
 -5 5 2 98.8118 4.05556 23
 -5 5 2 98.4117 4.03621 6
 -5 5 2 86.1908 3.1764 17
 -5 5 2 92.3762 4.56363 1
 -5 5 2 100.272 3.47325 16
 -5 5 2 94.3191 4.5261 1
 4 -5 -2 1.13109 1.75514 23
 4 -5 -2 1.24492 1.64547 1
 4 -5 -2 2.53992 1.47413 4
 4 -5 -2 1.29571 1.54536 1
 -4 5 2 2.34586 1.41241 6
 -4 5 2 1.87068 0.97723 13
 -4 5 2 2.49863 1.69156 21
 -4 5 2 0.25423 1.63721 1
 -4 5 2 0.07567 1.54437 1
 -4 5 2 2.26082 1.26633 23
 -4 5 2 2.52168 0.99864 17
 -4 5 2 1.35329 1.13398 16
 3 -5 -2 18.1401 0.82239 22
 3 -5 -2 16.6476 1.86707 1
 3 -5 -2 17.3215 1.37916 20
 3 -5 -2 20.5484 2.33947 1
 3 -5 -2 17.0931 1.88495 6
 3 -5 -2 17.6321 1.59636 13
 -3 5 2 19.9281 1.57564 17
 -3 5 2 20.2072 1.66249 16
 -3 5 2 16.2987 2.22596 1
 -3 5 2 17.8071 1.73071 13
 -3 5 2 14.5107 1.91625 21
 -3 5 2 20.9968 2.37366 1
 -3 5 2 17.5046 1.84659 23
 -3 5 2 19.6576 2.21559 12
 2 -5 -2 7.86717 1.33178 6
 2 -5 -2 9.75755 0.93481 22
 2 -5 -2 8.80445 1.23307 20
 2 -5 -2 8.80237 0.87535 19
 2 -5 -2 8.80939 1.57016 23
 2 -5 -2 7.94876 1.55672 1
 2 -5 -2 7.48133 1.18216 13
 2 -5 -2 8.83559 1.62414 21
 2 -5 -2 10.2684 1.63202 1
 -2 5 2 8.781 1.42181 12
 -2 5 2 8.58506 1.58778 1
 -2 5 2 9.42221 1.30399 24
 -2 5 2 7.01851 1.43242 21
 -2 5 2 7.9956 1.57568 1
 -2 5 2 9.33829 1.35166 23
 1 -5 -2 18.7698 2.11589 13
 1 -5 -2 15.5861 1.46337 20
 1 -5 -2 15.5193 1.77938 1
 1 -5 -2 17.0689 1.79739 12
 1 -5 -2 13.455 1.7398 23
 1 -5 -2 15.807 2.1369 1
 1 -5 -2 19.2556 1.97084 21
 -1 5 2 16.3663 1.84346 1
 -1 5 2 15.294 1.83008 21
 -1 5 2 18.0827 1.04578 19
 -1 5 2 18.1792 1.60492 24
 -1 5 2 18.128 1.87631 23
 -1 5 2 17.5743 2.11524 1
 0 -5 -2 34.7699 2.45141 21
 0 -5 -2 31.8981 2.51217 1
 0 -5 -2 28.2183 2.34725 23
 0 -5 -2 29.2743 2.41808 1
 0 -5 -2 31.5752 1.76561 20
 0 5 2 27.4294 2.55392 21
 0 5 2 31.3088 2.51648 1
 0 5 2 28.8989 1.82679 24
 0 5 2 30.8766 2.22407 2
 -1 -5 -2 380.859 9.67026 20
 -1 -5 -2 382.413 10.232 1
 -1 -5 -2 375.644 9.84493 2
 -1 -5 -2 363.718 9.939 21
 -1 -5 -2 362.487 10.0583 23
 1 5 2 374.492 9.38884 18
 1 5 2 381.734 10.144 9
 1 5 2 368.449 10.1883 1
 1 5 2 383.05 10.0142 21
 1 5 2 363.137 9.57076 24
 -2 -5 -2 0.41489 1.24872 21
 -2 -5 -2 0.50595 1.03792 20
 -2 -5 -2 -0.3592 1.48529 1
 -2 -5 -2 -0.1143 1.07896 2
 2 5 2 0.30855 1.38056 21
 2 5 2 -0.0436 1.53797 1
 2 5 2 -0.1643 0.79531 18
 2 5 2 -1.02 1.19054 9
 2 5 2 -1.123 1.09454 24
 2 5 2 0.04149 1.3265 15
 -3 -5 -2 122.985 4.28591 20
 -3 -5 -2 128.391 4.86463 1
 -3 -5 -2 135.459 4.73485 21
 -3 -5 -2 130.992 4.92472 14
 -3 -5 -2 131.483 4.65216 23
 3 5 2 127.58 3.68481 18
 3 5 2 134.894 4.62724 15
 3 5 2 133.015 4.51877 9
 3 5 2 126.101 4.28216 24
 3 5 2 130.602 4.92794 1
 -4 -5 -2 19.6662 2.51954 1
 -4 -5 -2 21.3245 2.24093 20
 -4 -5 -2 27.2639 2.08514 23
 -4 -5 -2 21.6686 2.46558 14
 -4 -5 -2 23.8998 2.87889 21
 4 5 2 24.675 2.29214 24
 4 5 2 22.7532 1.62209 18
 4 5 2 19.7378 2.6506 1
 -5 -5 -2 5.4336 2.19002 14
 -5 -5 -2 4.71239 2.1697 21
 -5 -5 -2 5.83056 2.24036 1
 -5 -5 -2 2.57375 1.47745 8
 -5 -5 -2 2.87181 1.44945 20
 5 5 2 4.09509 1.26867 18
 5 5 2 3.4597 2.07981 1
 5 5 2 5.71234 1.81394 24
 5 5 2 4.81734 2.33651 1
 -6 -5 -2 64.9579 3.5997 20
 -6 -5 -2 72.7611 4.68599 1
 -6 -5 -2 72.2509 4.99597 14
 -6 -5 -2 77.3317 5.82716 21
 6 5 2 82.2404 5.03266 1
 6 5 2 74.5196 4.7174 1
 6 5 2 66.91 2.91224 18
 6 5 2 77.5419 5.0172 5
 6 5 2 76.5815 4.36907 24
 -7 -5 -2 4.5303 2.96797 20
 -7 -5 -2 6.85965 2.65362 1
 -7 -5 -2 5.17655 3.19967 14
 7 5 2 8.48398 2.84333 1
 7 5 2 4.34842 2.94568 5
 7 5 2 1.56 2.58579 1
 7 5 2 2.47293 2.71005 24
 8 -6 -2 12.6666 3.13447 1
 8 -6 -2 20.6646 3.58473 1
 8 -6 -2 14.7266 3.60964 23
 8 -6 -2 16.7843 3.862 14
 -8 6 2 20.1999 3.66817 1
 -8 6 2 15.5511 3.7016 21
 -8 6 2 6.22855 2.96341 1
 -8 6 2 15.1721 2.50857 16
 -8 6 2 19.3416 3.69493 6
 -8 6 2 15.0539 2.45787 13
 7 -6 -2 0.61756 2.30686 1
 7 -6 -2 1.23665 2.65826 14
 7 -6 -2 0.63056 2.3823 1
 7 -6 -2 -0.6394 2.82409 23
 -7 6 2 -0.1384 2.44544 6
 -7 6 2 2.55772 2.7842 21
 -7 6 2 3.45896 2.57419 1
 -7 6 2 -0.1355 1.68651 13
 -7 6 2 0.54977 1.88573 16
 -7 6 2 -2.5983 2.45579 1
 6 -6 -2 57.3912 4.21713 14
 6 -6 -2 48.6371 4.1856 23
 6 -6 -2 50.3176 3.7239 4
 6 -6 -2 63.9213 4.08639 1
 6 -6 -2 49.7956 3.99131 1
 -6 6 2 49.1491 3.58377 1
 -6 6 2 58.7806 4.3941 21
 -6 6 2 52.248 2.90046 13
 -6 6 2 46.2908 1.86383 5
 -6 6 2 56.6913 3.91219 6
 -6 6 2 45.54 2.50856 17
 -6 6 2 54.2158 2.96025 16
 -6 6 2 39.9123 4.01701 1
 5 -6 -2 53.5807 3.90707 23
 5 -6 -2 60.7258 3.85485 14
 5 -6 -2 61.1417 3.82538 1
 5 -6 -2 57.7367 3.8074 1
 5 -6 -2 56.7501 3.55092 4
 -5 6 2 57.1541 3.92587 1
 -5 6 2 58.1841 2.76522 16
 -5 6 2 55.5621 2.81148 13
 -5 6 2 56.1336 3.96913 21
 -5 6 2 56.3355 2.63519 17
 -5 6 2 46.3996 3.32155 1
 -5 6 2 56.7588 3.26602 6
 -5 6 2 58.044 3.29225 23
 4 -6 -2 9.76099 1.3185 13
 4 -6 -2 7.56129 2.14135 23
 4 -6 -2 7.40141 1.90759 1
 4 -6 -2 9.24184 1.95535 1
 4 -6 -2 7.55996 1.47227 20
 -4 6 2 7.77614 1.54649 6
 -4 6 2 8.59293 1.36218 13
 -4 6 2 11.0465 2.02004 1
 -4 6 2 6.71198 1.85554 1
 -4 6 2 9.39079 1.33052 17
 -4 6 2 9.81854 1.45517 16
 -4 6 2 7.65288 1.39974 23
 -4 6 2 9.06943 1.98634 21
 3 -6 -2 134.673 5.00076 1
 3 -6 -2 136.863 3.58058 22
 3 -6 -2 135.249 4.39969 20
 3 -6 -2 137.659 4.2671 13
 3 -6 -2 134.534 4.99295 1
 3 -6 -2 139.847 3.78336 19
 3 -6 -2 135.333 5.04486 23
 3 -6 -2 135.171 4.54204 6
 -3 6 2 132.824 5.00541 1
 -3 6 2 137.045 5.02047 1
 -3 6 2 141.005 4.85135 12
 -3 6 2 134.083 4.61443 23
 -3 6 2 130.497 3.39995 10
 -3 6 2 133.26 4.23571 17
 -3 6 2 134.948 5.07358 21
 -3 6 2 133.848 4.09797 16
 2 -6 -2 195.604 6.0676 1
 2 -6 -2 194.853 5.71563 6
 2 -6 -2 193.306 6.06658 21
 2 -6 -2 188.233 5.66363 13
 2 -6 -2 190.024 6.09347 1
 2 -6 -2 185.291 5.4805 20
 -2 6 2 188.882 5.78732 23
 -2 6 2 190.11 5.4569 24
 -2 6 2 187.147 6.05424 1
 -2 6 2 184.951 5.68241 12
 -2 6 2 177.638 6.10259 21
 -2 6 2 192.109 6.12691 1
 1 -6 -2 35.0345 2.8072 21
 1 -6 -2 40.8134 2.4247 12
 1 -6 -2 37.2251 2.6801 1
 1 -6 -2 34.2076 2.72629 1
 1 -6 -2 38.9934 2.53762 13
 1 -6 -2 36.5939 2.01415 20
 1 -6 -2 37.3784 2.58845 23
 -1 6 2 33.7656 2.76395 1
 -1 6 2 37.4278 2.03182 24
 -1 6 2 38.74 2.36271 23
 -1 6 2 39.6948 1.40087 19
 -1 6 2 37.312 2.50577 21
 -1 6 2 35.7885 2.7113 1
 0 -6 -2 32.6199 2.72516 1
 0 -6 -2 33.4429 2.67041 1
 0 -6 -2 34.7099 2.01161 20
 0 -6 -2 32.287 2.12249 12
 0 -6 -2 35.9127 2.61567 21
 0 -6 -2 31.2299 2.53373 23
 0 6 2 30.4226 2.76101 1
 0 6 2 35.8157 2.04014 24
 0 6 2 28.8715 2.77344 21
 0 6 2 34.5539 2.36405 2
 -1 -6 -2 67.7987 3.54688 23
 -1 -6 -2 71.7459 2.79011 20
 -1 -6 -2 70.443 3.19028 21
 -1 -6 -2 67.4455 3.47187 1
 1 6 2 68.4685 3.38973 21
 1 6 2 66.9855 2.76287 24
 1 6 2 64.1494 3.50905 1
 -2 -6 -2 141.567 4.83638 21
 -2 -6 -2 135.382 4.45724 20
 -2 -6 -2 138.502 5.18389 1
 -2 -6 -2 132.478 4.56027 2
 2 6 2 138.026 5.2549 1
 2 6 2 137.789 5.01361 15
 2 6 2 135.132 4.98332 21
 2 6 2 139.538 4.42905 24
 2 6 2 136.353 4.80285 9
 -3 -6 -2 70.9341 3.62077 21
 -3 -6 -2 69.382 3.249 2
 -3 -6 -2 70.6011 3.72656 14
 -3 -6 -2 68.4083 3.89739 1
 -3 -6 -2 66.813 3.14289 20
 3 6 2 76.5292 3.66608 15
 3 6 2 67.1728 3.98233 1
 3 6 2 77.1322 3.50114 9
 3 6 2 69.6089 2.51579 18
 3 6 2 69.0958 3.12525 24
 -4 -6 -2 2.70423 1.96542 1
 -4 -6 -2 3.81216 1.72713 2
 -4 -6 -2 2.63897 1.55161 20
 -4 -6 -2 8.25365 2.21429 21
 -4 -6 -2 7.87114 1.79733 23
 -4 -6 -2 2.58858 1.98443 14
 4 6 2 4.49216 1.11931 18
 4 6 2 4.25375 1.73113 24
 4 6 2 5.77016 2.36075 1
 -5 -6 -2 25.6737 2.99234 14
 -5 -6 -2 26.7636 3.52689 1
 -5 -6 -2 24.1577 3.31963 21
 -5 -6 -2 22.391 2.60476 20
 5 6 2 21.4476 1.64474 18
 5 6 2 23.8275 2.59802 24
 5 6 2 27.1648 3.32437 1
 -6 -6 -2 9.39776 3.86593 21
 -6 -6 -2 2.11174 2.94018 14
 -6 -6 -2 7.31527 1.82971 8
 -6 -6 -2 4.35589 2.571 1
 -6 -6 -2 6.63853 2.21735 20
 6 6 2 6.70191 2.86688 1
 6 6 2 8.00778 2.45645 1
 6 6 2 -1.4616 2.43857 5
 6 6 2 7.53206 2.87088 24
 -7 -6 -2 -5.8835 2.80008 20
 -7 -6 -2 -4.5561 2.83959 1
 -7 -6 -2 -2.6464 3.65411 14
 7 6 2 3.94747 2.8713 24
 7 6 2 6.36604 3.04717 1
 7 6 2 5.83591 2.68456 1
 7 6 2 -1.8104 3.38524 5
 8 -7 -2 7.39373 3.53673 14
 8 -7 -2 4.17328 3.32195 23
 8 -7 -2 4.22663 3.22348 1
 8 -7 -2 -4.5829 2.81951 1
 -8 7 2 1.50428 2.4471 16
 -8 7 2 2.70328 3.65301 21
 -8 7 2 1.54801 2.90124 1
 -8 7 2 -2.4778 2.94174 1
 -8 7 2 1.52604 3.488 6
 -8 7 2 -0.2421 2.14975 13
 7 -7 -2 15.0918 3.17675 14
 7 -7 -2 19.6518 2.75887 1
 7 -7 -2 20.6392 3.32438 23
 7 -7 -2 14.6796 2.98282 1
 7 -7 -2 14.0239 2.96798 4
 -7 7 2 20.6715 3.20654 1
 -7 7 2 14.8502 1.72689 17
 -7 7 2 19.4368 3.14574 6
 -7 7 2 19.6203 3.29143 1
 -7 7 2 16.5832 2.21639 13
 -7 7 2 21.4151 3.55363 21
 -7 7 2 19.7847 2.3789 16
 6 -7 -2 15.4977 2.71413 1
 6 -7 -2 8.71743 2.97206 23
 6 -7 -2 14.6441 2.27252 20
 6 -7 -2 11.5254 2.72557 14
 6 -7 -2 9.8887 2.63167 1
 6 -7 -2 12.4027 2.53792 4
 -6 7 2 14.4079 2.75359 1
 -6 7 2 10.1471 2.65779 1
 -6 7 2 13.1667 2.50337 6
 -6 7 2 13.2016 1.90509 13
 -6 7 2 12.8079 2.02568 16
 -6 7 2 14.3153 2.8833 21
 -6 7 2 11.7318 1.63983 17
 5 -7 -2 -1.3725 2.01921 14
 5 -7 -2 1.55549 1.94748 1
 5 -7 -2 0.64318 1.6485 20
 5 -7 -2 1.21847 2.38653 23
 5 -7 -2 0.41688 1.91618 1
 5 -7 -2 2.29213 1.82707 4
 -5 7 2 1.08691 1.84088 1
 -5 7 2 2.93983 1.56668 16
 -5 7 2 1.81335 1.41836 17
 -5 7 2 3.96326 1.47531 13
 -5 7 2 2.97683 1.73424 23
 -5 7 2 2.53224 2.13926 1
 -5 7 2 4.71211 2.32813 21
 4 -7 -2 22.2397 2.99895 1
 4 -7 -2 26.4569 2.28715 20
 4 -7 -2 26.3004 2.29816 13
 4 -7 -2 21.7523 2.87549 1
 4 -7 -2 23.0395 2.04894 19
 4 -7 -2 23.202 2.76787 23
 -4 7 2 26.5519 2.72605 21
 -4 7 2 23.5025 2.27721 23
 -4 7 2 29.7547 3.06103 1
 -4 7 2 26.3907 2.38752 13
 -4 7 2 26.0542 2.33048 17
 -4 7 2 25.5072 2.79686 12
 -4 7 2 27.242 3.06902 1
 3 -7 -2 48.3047 2.59469 20
 3 -7 -2 51.4347 3.28775 1
 3 -7 -2 48.593 2.69264 13
 3 -7 -2 45.7111 3.39597 23
 3 -7 -2 47.6988 3.33745 1
 3 -7 -2 47.7894 1.69394 19
 3 -7 -2 47.1016 2.81271 6
 3 -7 -2 46.9585 2.14005 22
 -3 7 2 47.5677 3.29422 1
 -3 7 2 47.3527 3.37618 1
 -3 7 2 47.9938 2.71468 23
 -3 7 2 47.5499 3.4339 21
 -3 7 2 48.8113 2.5795 24
 -3 7 2 51.2547 2.9299 12
 2 -7 -2 95.6348 4.19569 1
 2 -7 -2 96.3258 4.26346 23
 2 -7 -2 95.1982 4.21787 21
 2 -7 -2 93.7534 3.75787 6
 2 -7 -2 95.7264 4.16456 1
 2 -7 -2 96.5918 3.7983 13
 2 -7 -2 97.5134 3.49278 20
 -2 7 2 94.6509 3.78073 23
 -2 7 2 95.2866 4.18482 1
 -2 7 2 96.9729 4.33937 1
 -2 7 2 98.9022 3.70552 12
 -2 7 2 93.9203 4.02668 21
 -2 7 2 93.8103 3.56587 24
 1 -7 -2 172.009 5.35498 12
 1 -7 -2 173.131 5.76525 21
 1 -7 -2 180.54 6.01328 23
 1 -7 -2 171.638 5.91027 1
 1 -7 -2 171.184 5.94432 1
 1 -7 -2 173.542 5.23638 20
 1 -7 -2 167.999 5.64652 13
 -1 7 2 171.602 5.18819 24
 -1 7 2 174.185 5.57221 23
 -1 7 2 172.861 5.85113 21
 -1 7 2 172.822 4.37638 19
 -1 7 2 170.946 5.78902 2
 -1 7 2 159.606 5.90513 1
 0 -7 -2 10.7969 1.52027 20
 0 -7 -2 6.24813 1.83493 1
 0 -7 -2 9.58016 1.51719 21
 0 -7 -2 12.2724 1.93993 13
 0 -7 -2 7.87738 1.86912 1
 0 -7 -2 9.54102 1.58992 12
 0 -7 -2 11.6121 2.08016 23
 0 7 2 12.1255 1.70891 2
 0 7 2 7.00703 1.86987 21
 0 7 2 8.8049 1.95877 1
 0 7 2 12.2095 1.56278 24
 -1 -7 -2 37.6868 2.26509 20
 -1 -7 -2 33.9195 2.71335 21
 -1 -7 -2 41.6929 3.16628 23
 -1 -7 -2 32.5425 2.97565 1
 1 7 2 35.4011 3.10485 1
 1 7 2 36.4359 3.09286 21
 1 7 2 38.6848 2.28407 24
 -2 -7 -2 167.917 5.7531 21
 -2 -7 -2 165.271 6.14861 1
 -2 -7 -2 168.777 5.4174 20
 -2 -7 -2 172.862 6.05284 23
 -2 -7 -2 172.362 4.45661 11
 -2 -7 -2 166.055 5.40646 2
 2 7 2 173.604 5.86007 9
 2 7 2 177.288 6.12305 15
 2 7 2 172.853 5.99288 21
 2 7 2 173.746 6.23892 1
 2 7 2 168.399 5.34146 24
 -3 -7 -2 -0.2831 1.40286 20
 -3 -7 -2 -0.2105 1.47814 2
 -3 -7 -2 0.67818 1.6819 21
 -3 -7 -2 1.15066 1.81839 14
 -3 -7 -2 -0.0736 1.78504 1
 3 7 2 2.86862 1.65995 9
 3 7 2 0.21176 1.55783 24
 3 7 2 0.9288 1.75491 15
 3 7 2 -0.9472 2.04146 1
 -4 -7 -2 43.6917 4.05317 21
 -4 -7 -2 42.5991 3.21613 2
 -4 -7 -2 43.0824 3.73674 14
 -4 -7 -2 35.2691 3.75794 1
 -4 -7 -2 40.53 2.9964 20
 4 7 2 47.9157 3.98319 1
 4 7 2 37.8949 2.59182 24
 -5 -7 -2 7.67781 2.49078 1
 -5 -7 -2 10.6191 2.27603 2
 -5 -7 -2 12.7664 3.40845 21
 -5 -7 -2 11.8624 2.94438 14
 -5 -7 -2 12.431 2.36314 20
 5 7 2 12.2651 2.76768 1
 -6 -7 -2 -2.5467 2.90568 14
 -6 -7 -2 -0.2466 2.11998 8
 -6 -7 -2 1.68903 2.51527 2
 -6 -7 -2 -2.7196 2.46191 1
 6 7 2 1.60458 2.68822 1
 6 7 2 1.07032 2.68553 24
 6 7 2 4.30787 2.50322 1
 -7 -7 -2 5.31842 3.45347 20
 -7 -7 -2 7.2842 4.1012 14
 -7 -7 -2 -0.1812 3.08824 1
 7 7 2 7.39652 3.39926 1
 7 7 2 2.33919 2.94323 1
 7 7 2 0.98791 3.81781 5
 7 7 2 6.91209 3.27108 24
 8 -8 -2 0.17977 3.04903 20
 8 -8 -2 -3.8311 3.26022 23
 8 -8 -2 0.36867 3.80764 14
 8 -8 -2 7.15985 3.51694 1
 8 -8 -2 6.84562 3.20279 1
 -8 8 2 0.90336 3.59472 21
 -8 8 2 0.98338 3.3407 1
 -8 8 2 4.66884 3.68486 6
 -8 8 2 3.71855 2.40134 13
 -8 8 2 0.04927 2.98903 1
 7 -8 -2 47.8969 4.37999 1
 7 -8 -2 42.0255 4.3355 1
 7 -8 -2 43.3689 4.8841 23
 7 -8 -2 40.7293 4.822 4
 7 -8 -2 51.675 3.71007 20
 7 -8 -2 48.224 5.06883 14
 -7 8 2 34.4019 2.82742 17
 -7 8 2 39.1953 4.53013 1
 -7 8 2 40.728 4.55456 6
 -7 8 2 43.9822 5.16653 21
 -7 8 2 41.3429 3.76223 13
 -7 8 2 42.8114 4.55466 1
 -7 8 2 33.9438 1.99365 5
 6 -8 -2 0.36694 2.05125 1
 6 -8 -2 0.56935 2.65148 23
 6 -8 -2 2.5318 1.82082 20
 6 -8 -2 -3.5031 2.3851 14
 6 -8 -2 1.88381 2.42207 1
 6 -8 -2 -0.4704 2.29712 4
 -6 8 2 1.79664 2.65218 21
 -6 8 2 0.03678 2.20545 1
 -6 8 2 1.27813 1.83623 13
 -6 8 2 -1.002 1.62648 17
 -6 8 2 -2.2994 2.48154 1
 5 -8 -2 100.586 5.19542 1
 5 -8 -2 92.7164 4.02767 20
 5 -8 -2 109.019 4.87031 1
 5 -8 -2 105.905 5.43914 23
 5 -8 -2 90.9566 4.69703 14
 5 -8 -2 99.0496 4.14398 19
 -5 8 2 104.648 3.96781 17
 -5 8 2 99.8926 5.28845 1
 -5 8 2 107.654 5.23623 1
 -5 8 2 102.629 4.95857 12
 -5 8 2 105.279 5.44733 21
 -5 8 2 106.605 4.32678 13
 4 -8 -2 59.4617 3.3328 13
 4 -8 -2 55.0838 2.26783 19
 4 -8 -2 55.9333 3.98068 1
 4 -8 -2 59.7121 3.71996 1
 4 -8 -2 54.5583 1.72773 22
 4 -8 -2 54.1636 3.03683 20
 4 -8 -2 55.0575 4.10463 23
 -4 8 2 56.9195 3.99287 1
 -4 8 2 47.1337 3.19221 23
 -4 8 2 61.8414 3.98294 1
 -4 8 2 56.2333 4.23141 21
 -4 8 2 59.7032 3.79945 12
 -4 8 2 54.4132 3.06035 17
 3 -8 -2 56.5529 3.94972 23
 3 -8 -2 58.8224 3.29088 13
 3 -8 -2 55.3821 2.89226 20
 3 -8 -2 60.4268 3.35473 1
 3 -8 -2 62.2571 3.81982 1
 3 -8 -2 67.8148 3.35778 6
 -3 8 2 51.7133 3.07556 23
 -3 8 2 62.6505 3.30177 12
 -3 8 2 60.6571 4.07447 21
 -3 8 2 61.7252 3.07531 24
 -3 8 2 56.7963 3.79247 1
 -3 8 2 61.0966 3.73542 1
 2 -8 -2 189.208 6.5331 1
 2 -8 -2 187.69 6.14988 13
 2 -8 -2 186.043 5.76537 20
 2 -8 -2 195.555 6.59583 1
 2 -8 -2 178.317 6.53358 23
 2 -8 -2 195.535 6.28779 21
 2 -8 -2 187.713 5.98406 6
 -2 8 2 178.861 5.73793 24
 -2 8 2 188.904 6.56019 21
 -2 8 2 185.312 6.33882 1
 -2 8 2 184.144 6.60033 1
 -2 8 2 195.961 6.21181 23
 -2 8 2 183.808 5.84303 12
 1 -8 -2 3.65831 1.92445 1
 1 -8 -2 7.96997 1.88953 1
 1 -8 -2 4.14349 1.49065 21
 1 -8 -2 4.72055 1.84358 13
 1 -8 -2 7.60644 1.99159 23
 1 -8 -2 4.10542 1.43012 12
 1 -8 -2 5.54268 1.37312 20
 -1 8 2 6.61148 1.75166 2
 -1 8 2 5.1915 1.48453 23
 -1 8 2 4.8106 2.01031 1
 -1 8 2 6.15857 1.49659 24
 -1 8 2 7.27623 1.97141 21
 -1 8 2 5.67397 0.66779 19
 0 -8 -2 59.0157 3.58198 1
 0 -8 -2 63.5848 3.39166 21
 0 -8 -2 55.3685 3.60436 1
 0 -8 -2 56.9078 2.94937 12
 0 -8 -2 53.6983 3.65542 23
 0 -8 -2 55.9177 3.15708 13
 0 -8 -2 54.6645 2.8624 20
 0 8 2 56.0451 3.63805 21
 0 8 2 53.3574 2.74992 24
 0 8 2 52.4151 3.66027 1
 0 8 2 57.0763 3.35189 2
 -1 -8 -2 127.01 5.25071 1
 -1 -8 -2 131.413 4.94969 21
 -1 -8 -2 128.01 4.5058 20
 -1 -8 -2 133.263 5.3046 1
 -1 -8 -2 120.886 5.28147 23
 1 8 2 120.292 5.11134 21
 1 8 2 125.461 4.42345 24
 1 8 2 129.398 5.37073 1
 -2 -8 -2 0.59766 1.67074 21
 -2 -8 -2 -1.0809 1.82155 1
 -2 -8 -2 0.15314 1.46178 20
 -2 -8 -2 1.17346 0.8214 11
 -2 -8 -2 -2.3896 1.95583 23
 2 8 2 -0.4301 1.90384 1
 2 8 2 -1.7794 1.90153 21
 2 8 2 -0.1224 1.38806 24
 2 8 2 -0.6061 1.93747 15
 2 8 2 1.8728 1.81867 9
 -3 -8 -2 95.7075 4.97785 1
 -3 -8 -2 99.7102 4.89241 14
 -3 -8 -2 96.9026 4.17804 2
 -3 -8 -2 89.8552 4.12053 20
 -3 -8 -2 98.1366 4.83268 21
 3 8 2 103.614 4.71564 9
 3 8 2 95.4553 4.11923 24
 3 8 2 101.404 5.18175 1
 3 8 2 108.718 4.92734 21
 3 8 2 99.8775 4.92684 15
 -4 -8 -2 68.5457 3.80778 20
 -4 -8 -2 68.5864 3.94047 2
 -4 -8 -2 76.9449 5.05814 14
 -4 -8 -2 69.6148 5.01228 21
 -4 -8 -2 68.0735 4.61047 1
 4 8 2 63.9904 3.66001 24
 4 8 2 70.315 4.18601 9
 4 8 2 77.5719 4.92341 1
 -5 -8 -2 -2.836 1.87934 20
 -5 -8 -2 3.48376 2.24588 2
 -5 -8 -2 1.50472 3.09274 14
 -5 -8 -2 -3.2244 2.11877 1
 -5 -8 -2 3.18262 3.64272 21
 5 8 2 0.15372 2.44855 1
 5 8 2 2.99341 2.60249 24
 -6 -8 -2 2.16225 2.63823 2
 -6 -8 -2 2.04871 2.68618 8
 -6 -8 -2 1.92765 3.37453 14
 -6 -8 -2 2.0409 3.08655 20
 -6 -8 -2 1.29846 2.85072 1
 6 8 2 3.85036 2.89076 24
 6 8 2 6.83246 2.805 1
 6 8 2 5.10667 2.74036 1
 8 -9 -2 9.77417 3.6539 1
 8 -9 -2 20.1073 3.55883 20
 8 -9 -2 -1.6186 3.52525 1
 8 -9 -2 16.1806 4.36008 14
 8 -9 -2 17.0073 4.07742 23
 -8 9 2 10.4766 4.14739 21
 -8 9 2 11.3423 3.66228 1
 -8 9 2 10.1139 2.76868 13
 -8 9 2 11.6818 3.90477 1
 7 -9 -2 7.24723 3.26382 23
 7 -9 -2 5.62824 3.27266 4
 7 -9 -2 2.38084 2.70616 1
 7 -9 -2 8.12262 2.6212 1
 7 -9 -2 10.6208 3.42503 14
 -7 9 2 8.61842 2.99728 1
 -7 9 2 7.75333 3.44476 21
 -7 9 2 5.14828 2.00354 17
 -7 9 2 7.14627 3.12203 1
 -7 9 2 5.51142 2.40227 13
 6 -9 -2 29.2763 3.51405 1
 6 -9 -2 21.4755 2.82781 20
 6 -9 -2 31.0302 4.36115 4
 6 -9 -2 20.5771 3.35968 19
 6 -9 -2 28.3821 3.47671 14
 6 -9 -2 23.4779 3.70077 23
 6 -9 -2 20.9613 2.92364 1
 -6 9 2 18.1779 3.41865 12
 -6 9 2 28.429 3.07892 17
 -6 9 2 28.6393 3.60124 13
 -6 9 2 32.6961 4.16531 1
 -6 9 2 38.4929 4.25194 1
 -6 9 2 29.1765 3.72455 21
 5 -9 -2 107.229 4.66469 13
 5 -9 -2 106.863 4.73532 20
 5 -9 -2 100.584 3.87652 19
 5 -9 -2 119.105 5.55457 1
 5 -9 -2 111.484 5.79148 23
 5 -9 -2 110.267 5.53878 1
 -5 9 2 111.507 5.86399 21
 -5 9 2 107.548 4.40286 17
 -5 9 2 110.183 5.2449 12
 -5 9 2 112.602 5.65271 1
 -5 9 2 108.497 5.55627 1
 4 -9 -2 14.2466 1.43222 22
 4 -9 -2 13.0383 2.67792 1
 4 -9 -2 11.701 2.2012 20
 4 -9 -2 10.4862 2.80969 23
 4 -9 -2 10.7285 2.34079 1
 4 -9 -2 11.9027 2.15152 13
 -4 9 2 10.0706 2.73402 21
 -4 9 2 12.5725 2.07763 17
 -4 9 2 13.9336 2.36356 12
 -4 9 2 13.46 2.56744 1
 -4 9 2 13.4783 2.63661 1
 3 -9 -2 208.889 7.52707 23
 3 -9 -2 213.759 7.38519 1
 3 -9 -2 207.677 6.58111 20
 3 -9 -2 207.122 6.6338 6
 3 -9 -2 221.305 7.54783 1
 3 -9 -2 201.199 6.83554 13
 -3 9 2 204.119 6.89897 23
 -3 9 2 213.581 7.43717 1
 -3 9 2 220.569 7.61319 1
 -3 9 2 204.277 6.66766 12
 -3 9 2 204.768 7.18136 21
 -3 9 2 204.51 6.53931 24
 2 -9 -2 19.6689 2.10751 20
 2 -9 -2 15.4836 2.36783 21
 2 -9 -2 27.6553 3.31927 13
 2 -9 -2 19.6339 2.65031 1
 2 -9 -2 19.9899 2.69519 23
 2 -9 -2 20.0961 2.53779 1
 -2 9 2 18.8502 2.21909 24
 -2 9 2 16.7942 2.59225 21
 -2 9 2 24.8884 2.49166 23
 -2 9 2 20.5989 2.75472 1
 -2 9 2 20.1811 2.63724 1
 1 -9 -2 87.6407 4.3359 21
 1 -9 -2 97.5158 3.88342 20
 1 -9 -2 91.8855 4.34276 1
 1 -9 -2 101.427 4.70594 1
 1 -9 -2 97.707 4.79289 23
 1 -9 -2 96.2542 3.94812 12
 1 -9 -2 98.5574 4.61978 13
 -1 9 2 95.6113 3.97018 23
 -1 9 2 95.1805 4.41743 1
 -1 9 2 92.1035 2.48281 19
 -1 9 2 97.6966 4.4405 2
 -1 9 2 94.6958 4.74751 21
 -1 9 2 93.9669 3.86244 24
 0 -9 -2 102.63 4.94784 13
 0 -9 -2 110.498 4.2273 20
 0 -9 -2 106.527 4.26174 12
 0 -9 -2 109.662 5.09964 23
 0 -9 -2 109.949 4.63995 21
 0 -9 -2 109.914 5.05503 1
 0 -9 -2 108.984 5.02086 1
 0 9 2 110.232 4.17102 24
 0 9 2 107.621 5.00905 21
 0 9 2 111.293 4.55394 2
 0 9 2 110.649 5.12265 1
 -1 -9 -2 6.12426 2.15343 1
 -1 -9 -2 7.40367 2.06072 23
 -1 -9 -2 4.52791 2.00932 1
 -1 -9 -2 3.69295 1.62149 20
 -1 -9 -2 3.1046 1.62857 21
 -1 -9 -2 4.22425 2.176 13
 1 9 2 1.72922 2.10179 1
 1 9 2 8.21186 1.81027 24
 1 9 2 0.9457 2.01593 21
 -2 -9 -2 105.836 4.45947 20
 -2 -9 -2 109.148 5.10085 23
 -2 -9 -2 108.643 3.55634 11
 -2 -9 -2 111.142 4.99596 21
 -2 -9 -2 114.97 5.32249 1
 2 9 2 114.049 4.46777 24
 2 9 2 111.081 5.35031 15
 2 9 2 108.111 5.21053 21
 2 9 2 107.626 5.40615 1
 2 9 2 111.258 5.47253 9
 -3 -9 -2 92.4121 4.3452 20
 -3 -9 -2 97.9551 5.57387 23
 -3 -9 -2 105.516 5.27795 14
 -3 -9 -2 107.586 5.35668 1
 -3 -9 -2 97.0305 5.37804 21
 3 9 2 98.7024 5.38483 1
 3 9 2 93.3794 4.29614 24
 3 9 2 108.997 5.22985 21
 3 9 2 104.942 5.49941 15
 3 9 2 100.259 5.05794 9
 -4 -9 -2 2.13472 2.2329 1
 -4 -9 -2 2.25429 3.18528 21
 -4 -9 -2 0.10955 1.83651 20
 -4 -9 -2 4.74284 2.87165 14
 4 9 2 5.50368 2.51109 1
 4 9 2 3.09315 2.53114 15
 4 9 2 -0.9655 2.21419 9
 4 9 2 2.14056 2.66841 24
 -5 -9 -2 11.8644 2.5207 2
 -5 -9 -2 13.5253 3.66508 14
 -5 -9 -2 6.24193 2.72711 1
 5 9 2 14.7276 3.04134 24
 5 9 2 15.9096 3.09654 1
 -6 -9 -2 -0.6877 2.81412 2
 -6 -9 -2 -2.1419 3.31739 8
 -6 -9 -2 -2.2528 2.99527 20
 -6 -9 -2 2.02975 3.74508 14
 -6 -9 -2 -3.5432 2.99884 1
 6 9 2 -1.1732 2.8874 24
 6 9 2 9.49073 3.11026 1
 7 -10 -2 4.89752 3.2579 1
 7 -10 -2 14.3779 3.10732 1
 7 -10 -2 9.31783 3.07345 20
 7 -10 -2 21.3637 3.88201 14
 7 -10 -2 13.5107 3.46237 23
 7 -10 -2 12.4849 3.95213 4
 -7 10 2 11.1791 2.3029 17
 -7 10 2 10.4148 3.67823 1
 -7 10 2 9.61434 3.81224 12
 -7 10 2 8.01717 3.87231 21
 -7 10 2 12.8785 3.22492 1
 6 -10 -2 7.61384 3.19278 4
 6 -10 -2 7.9539 2.71678 1
 6 -10 -2 6.97564 2.3899 20
 6 -10 -2 2.08886 3.06084 23
 6 -10 -2 10.7141 2.58533 1
 6 -10 -2 5.91501 3.14421 14
 6 -10 -2 6.3215 2.56885 19
 -6 10 2 7.08637 2.75419 1
 -6 10 2 11.796 2.74548 1
 -6 10 2 9.42784 3.103 12
 -6 10 2 6.58963 2.1807 17
 -6 10 2 8.82748 3.34276 21
 5 -10 -2 5.67094 2.4077 1
 5 -10 -2 6.99433 3.10157 23
 5 -10 -2 6.36692 2.28902 13
 5 -10 -2 3.6669 2.29357 1
 5 -10 -2 8.40525 2.25526 20
 5 -10 -2 5.39459 1.05483 19
 -5 10 2 3.39128 2.4262 1
 -5 10 2 0.21705 2.69516 21
 -5 10 2 6.02433 2.58339 12
 -5 10 2 2.9234 2.25853 17
 -5 10 2 2.94312 2.35179 1
 4 -10 -2 52.0706 4.60927 23
 4 -10 -2 55.5393 3.92117 13
 4 -10 -2 49.5037 3.35714 20
 4 -10 -2 51.8899 4.43887 1
 4 -10 -2 50.3883 4.09072 1
 -4 10 2 51.518 4.69571 21
 -4 10 2 43.3274 1.63208 10
 -4 10 2 53.0707 4.08815 12
 -4 10 2 49.8794 3.60765 17
 -4 10 2 51.2514 4.34545 1
 -4 10 2 51.7354 4.44819 1
 3 -10 -2 91.3228 5.16792 23
 3 -10 -2 81.3804 3.92853 20
 3 -10 -2 81.9035 4.61368 13
 3 -10 -2 83.6727 4.89918 1
 3 -10 -2 83.1814 4.23532 6
 3 -10 -2 87.1941 4.80619 1
 -3 10 2 90.7473 5.0719 1
 -3 10 2 87.5209 4.95421 1
 -3 10 2 83.9138 3.95813 24
 -3 10 2 88.7759 5.20718 21
 -3 10 2 85.3717 4.29613 12
 2 -10 -2 65.1816 4.42188 1
 2 -10 -2 61.4382 3.32832 20
 2 -10 -2 63.463 4.2043 1
 2 -10 -2 56.691 4.06688 21
 2 -10 -2 55.0757 4.40593 23
 2 -10 -2 62.3894 4.03454 13
 -2 10 2 66.0586 4.48448 1
 -2 10 2 62.3052 4.3909 1
 -2 10 2 60.9841 4.44199 21
 -2 10 2 58.1714 3.3216 24
 -2 10 2 52.3107 3.48442 23
 1 -10 -2 127.438 5.36484 21
 1 -10 -2 120.766 4.76401 20
 1 -10 -2 124.726 5.58221 13
 1 -10 -2 131.58 5.65224 1
 1 -10 -2 126.063 5.75182 1
 1 -10 -2 132.38 5.8653 23
 -1 10 2 122.553 5.13037 23
 -1 10 2 123.059 5.70649 21
 -1 10 2 128.394 4.782 24
 -1 10 2 133.851 5.86149 1
 -1 10 2 133.469 5.44728 2
 0 -10 -2 10.2566 1.91725 12
 0 -10 -2 7.24329 2.23562 13
 0 -10 -2 5.64528 2.20963 1
 0 -10 -2 6.55858 1.91268 20
 0 -10 -2 11.3128 2.69826 23
 0 -10 -2 5.25412 1.66618 21
 0 -10 -2 8.2968 2.46973 1
 0 10 2 9.24838 2.37261 21
 0 10 2 9.05331 1.41623 19
 0 10 2 10.9525 2.64947 1
 0 10 2 9.26553 1.96971 24
 0 10 2 10.1065 2.21483 2
 -1 -10 -2 57.4483 3.43755 20
 -1 -10 -2 65.7769 4.48924 13
 -1 -10 -2 62.2464 4.67321 23
 -1 -10 -2 62.6348 3.70108 12
 -1 -10 -2 56.3968 4.26286 1
 -1 -10 -2 59.9384 4.23372 1
 -1 -10 -2 64.6739 4.28115 21
 1 10 2 70.7003 4.6127 1
 1 10 2 59.405 4.47329 21
 1 10 2 68.0231 3.49905 24
 -2 -10 -2 35.4991 3.20438 1
 -2 -10 -2 33.203 4.09224 13
 -2 -10 -2 41.52 3.91051 1
 -2 -10 -2 38.7988 2.44989 11
 -2 -10 -2 39.3505 4.28603 23
 -2 -10 -2 42.0489 4.35645 21
 -2 -10 -2 36.5069 3.00997 20
 2 10 2 39.523 3.01941 24
 2 10 2 37.9391 4.14145 1
 2 10 2 44.2314 4.17489 21
 2 10 2 35.1952 4.4954 9
 2 10 2 38.9179 4.28844 15
 -3 -10 -2 4.22992 2.87475 23
 -3 -10 -2 4.7011 1.96405 20
 -3 -10 -2 3.13959 3.02209 21
 -3 -10 -2 0.80073 2.15869 1
 3 10 2 3.82741 2.72978 15
 3 10 2 1.70472 2.49864 21
 3 10 2 3.35295 2.62671 1
 3 10 2 5.63764 2.60753 9
 -4 -10 -2 4.57975 2.18097 20
 -4 -10 -2 5.37378 2.56647 1
 -4 -10 -2 0.409 2.89731 14
 -4 -10 -2 10.6349 3.3708 23
 4 10 2 8.4679 3.02062 24
 4 10 2 10.7382 3.12741 15
 4 10 2 6.56234 2.79778 9
 4 10 2 9.24373 2.94782 1
 -5 -10 -2 17.3795 4.03953 14
 -5 -10 -2 10.8207 3.18132 20
 -5 -10 -2 14.2675 3.73527 23
 -5 -10 -2 12.2283 3.09972 1
 5 10 2 11.4248 3.16705 24
 5 10 2 18.0821 3.20954 1
 7 -11 -2 12.759 3.19436 1
 7 -11 -2 13.7641 3.43113 20
 7 -11 -2 13.163 3.928 23
 7 -11 -2 16.0215 3.9309 1
 7 -11 -2 18.4417 4.06739 14
 7 -11 -2 13.9142 2.48949 7
 7 -11 -2 15.6582 4.38855 4
 -7 11 2 8.66305 3.94848 1
 -7 11 2 9.73937 2.69009 17
 -7 11 2 16.9985 4.59974 12
 -7 11 2 10.8216 3.45409 1
 -7 11 2 16.3531 3.9212 21
 6 -11 -2 3.47352 2.68407 1
 6 -11 -2 3.75355 2.60207 1
 6 -11 -2 -1.593 3.22624 23
 6 -11 -2 0.21978 2.42863 14
 -6 11 2 3.06549 2.35189 17
 -6 11 2 4.80079 3.21292 12
 -6 11 2 -2.0988 2.56631 1
 -6 11 2 2.62008 2.79213 1
 -6 11 2 -1.983 3.05247 21
 5 -11 -2 19.0377 3.7481 23
 5 -11 -2 25.2622 3.47209 1
 5 -11 -2 17.6976 2.36584 20
 5 -11 -2 15.2435 2.76431 1
 5 -11 -2 17.6635 2.93962 13
 -5 11 2 22.1014 3.38503 12
 -5 11 2 19.1419 3.02998 17
 -5 11 2 21.2675 3.53097 1
 -5 11 2 21.4637 3.25653 1
 -5 11 2 17.0174 3.56532 21
 4 -11 -2 6.60239 3.07434 23
 4 -11 -2 9.01489 2.18021 20
 4 -11 -2 6.50874 2.7482 1
 4 -11 -2 6.36056 2.4633 13
 4 -11 -2 6.89448 2.50806 1
 -4 11 2 8.63929 2.63829 12
 -4 11 2 0.20483 2.55956 1
 -4 11 2 3.78322 2.84968 21
 -4 11 2 7.40408 2.55697 1
 3 -11 -2 -1.4861 1.62104 20
 3 -11 -2 0.89574 2.80907 23
 3 -11 -2 0.59831 2.38464 13
 3 -11 -2 0.64244 2.05936 6
 3 -11 -2 -0.8928 2.13751 1
 3 -11 -2 0.96432 2.32407 1
 -3 11 2 -0.2028 2.32018 1
 -3 11 2 -2.6943 1.97988 24
 -3 11 2 0.00759 2.22532 1
 -3 11 2 -2.9804 2.55206 21
 2 -11 -2 85.6884 5.38137 23
 2 -11 -2 97.6018 5.48218 13
 2 -11 -2 92.1047 4.93823 1
 2 -11 -2 99.3401 5.27596 1
 2 -11 -2 79.5859 4.7211 21
 2 -11 -2 82.7076 4.12096 20
 -2 11 2 96.2713 5.39024 21
 -2 11 2 90.9393 4.20084 24
 -2 11 2 94.5796 5.03953 2
 -2 11 2 95.1869 5.44492 1
 1 -11 -2 1.68491 1.76196 20
 1 -11 -2 0.98431 2.14083 1
 1 -11 -2 -0.0426 2.16646 21
 1 -11 -2 3.29728 2.66587 23
 1 -11 -2 2.19576 0.86056 3
 1 -11 -2 2.95306 2.37634 13
 1 -11 -2 4.47713 2.2254 1
 -1 11 2 -1.5792 2.39476 21
 -1 11 2 3.59238 1.85169 24
 -1 11 2 4.62673 2.27572 2
 -1 11 2 1.29848 2.24448 1
 0 -11 -2 16.1422 2.7503 1
 0 -11 -2 22.1677 2.53759 20
 0 -11 -2 20.3292 2.74992 21
 0 -11 -2 21.0116 2.82444 1
 0 -11 -2 17.119 2.8782 13
 0 -11 -2 18.2229 2.33883 12
 0 -11 -2 18.1345 3.27376 23
 0 11 2 17.8683 2.44165 24
 0 11 2 23.4952 2.86024 2
 0 11 2 21.9012 2.04403 19
 0 11 2 24.0436 3.18305 1
 0 11 2 17.9087 3.00023 21
 -1 -11 -2 40.1327 4.32706 13
 -1 -11 -2 49.703 4.37389 21
 -1 -11 -2 53.1122 4.74993 23
 -1 -11 -2 48.4711 3.74546 12
 -1 -11 -2 49.2526 4.12564 1
 -1 -11 -2 42.9662 3.24624 20
 -1 -11 -2 48.7199 4.179 1
 1 11 2 47.9304 4.4324 1
 1 11 2 47.4595 4.48923 21
 1 11 2 51.8297 3.3344 24
 -2 -11 -2 -0.6 1.63513 1
 -2 -11 -2 3.23066 2.20884 1
 -2 -11 -2 0.60697 1.50614 11
 -2 -11 -2 3.9018 3.22016 21
 -2 -11 -2 -0.5929 2.29265 13
 -2 -11 -2 0.24633 1.79825 20
 -2 -11 -2 0.35365 2.93017 23
 2 11 2 -0.251 2.71832 15
 2 11 2 -0.5446 2.36095 21
 2 11 2 -4.7558 2.14122 1
 2 11 2 -1.7615 2.86579 9
 -3 -11 -2 27.0155 3.35094 1
 -3 -11 -2 31.7928 4.03631 23
 -3 -11 -2 31.7219 3.20905 20
 -3 -11 -2 24.8208 3.56739 13
 3 11 2 31.9816 4.02647 15
 3 11 2 26.0697 3.54343 21
 3 11 2 32.5251 4.30776 9
 3 11 2 26.5744 3.64989 1
 3 11 2 27.7213 3.46523 24
 -4 -11 -2 4.83164 3.56459 23
 -4 -11 -2 7.46284 2.49402 20
 -4 -11 -2 8.48247 3.75904 14
 -4 -11 -2 2.66792 2.58289 1
 4 11 2 7.66263 3.15144 24
 4 11 2 8.36527 3.12134 1
 4 11 2 14.5841 3.71293 15
 4 11 2 13.4797 3.44765 9
 -5 -11 -2 -3.9338 3.26521 23
 -5 -11 -2 1.27658 3.9753 14
 -5 -11 -2 -6.7252 3.07826 20
 5 11 2 1.1149 3.13692 24
 5 11 2 -0.8485 3.40012 1
 6 -12 -2 7.62976 3.39659 1
 6 -12 -2 7.76481 3.12313 20
 6 -12 -2 9.77829 3.73861 14
 6 -12 -2 3.4802 3.6848 23
 6 -12 -2 1.3277 3.18402 1
 -6 12 2 9.53445 2.80112 17
 -6 12 2 14.9836 3.55011 1
 -6 12 2 10.5736 4.15661 12
 -6 12 2 5.32476 3.49604 1
 -6 12 2 10.828 3.82212 21
 5 -12 -2 9.64962 3.22023 13
 5 -12 -2 4.32304 2.49059 1
 5 -12 -2 4.75179 3.49554 23
 5 -12 -2 9.78401 3.14045 1
 -5 12 2 12.5636 3.17705 1
 -5 12 2 8.53305 3.1863 12
 -5 12 2 10.7264 3.08873 17
 -5 12 2 8.97671 3.41416 21
 -5 12 2 10.0818 3.16536 1
 4 -12 -2 -3.9069 3.06563 23
 4 -12 -2 -1.2106 1.92243 20
 4 -12 -2 7.83242 2.6065 1
 4 -12 -2 4.46022 2.78796 1
 4 -12 -2 2.82298 2.7671 13
 -4 12 2 2.68558 2.96916 24
 -4 12 2 0.6703 2.84168 21
 -4 12 2 6.83023 2.71702 12
 -4 12 2 0.58137 2.86119 1
 -4 12 2 -2.9484 2.68533 1
 3 -12 -2 6.61528 2.35325 1
 3 -12 -2 6.08704 2.81701 13
 3 -12 -2 0.42248 2.96823 23
 3 -12 -2 3.31239 2.34653 1
 3 -12 -2 5.62117 1.98999 20
 3 -12 -2 5.55596 2.3987 6
 -3 12 2 2.69476 2.52786 1
 -3 12 2 3.5125 2.40174 1
 -3 12 2 3.12212 2.58798 21
 2 -12 -2 8.16983 2.36626 1
 2 -12 -2 3.07563 2.69288 13
 2 -12 -2 0.22159 1.751 20
 2 -12 -2 -1.6085 2.56744 23
 2 -12 -2 -0.7298 2.3544 1
 -2 12 2 1.62077 2.40073 21
 -2 12 2 0.70275 2.59309 1
 -2 12 2 -1.7903 2.42655 2
 1 -12 -2 3.84961 2.04282 1
 1 -12 -2 7.52501 3.00103 23
 1 -12 -2 8.03654 2.09308 20
 1 -12 -2 6.2165 2.65093 1
 1 -12 -2 5.87991 2.64461 13
 -1 12 2 0.13923 2.47327 1
 -1 12 2 5.60762 2.49627 2
 -1 12 2 3.48808 2.66853 21
 0 -12 -2 73.6109 4.69522 1
 0 -12 -2 68.7907 3.63054 20
 0 -12 -2 75.2563 5.16957 13
 0 -12 -2 70.2433 4.14536 12
 0 -12 -2 78.7907 5.37314 23
 0 -12 -2 83.4434 5.05087 1
 0 12 2 76.17 5.03329 1
 0 12 2 73.5334 4.80727 2
 0 12 2 70.6825 2.90325 19
 0 12 2 77.4875 5.01197 21
 -1 -12 -2 -2.115 2.09551 12
 -1 -12 -2 -0.0354 1.97853 20
 -1 -12 -2 -1.0724 2.25447 13
 -1 -12 -2 0.9191 2.28434 23
 -1 -12 -2 -1.9946 1.97625 1
 -1 -12 -2 -5.5925 2.14979 1
 1 12 2 2.0167 2.57608 24
 1 12 2 -3.3841 2.28007 1
 1 12 2 -3.3589 2.59385 21
 -2 -12 -2 22.1852 2.9328 20
 -2 -12 -2 27.3965 2.9485 11
 -2 -12 -2 16.0225 3.30597 13
 -2 -12 -2 21.8752 3.26097 1
 -2 -12 -2 20.8356 3.18481 1
 -2 -12 -2 29.0385 4.03881 23
 2 12 2 20.8411 3.87143 9
 2 12 2 21.7439 3.39543 24
 2 12 2 18.8816 3.35492 21
 2 12 2 21.3926 3.84571 15
 2 12 2 18.9498 3.31772 1
 -3 -12 -2 6.56221 3.57155 23
 -3 -12 -2 3.35962 2.70165 13
 -3 -12 -2 13.6133 2.78567 1
 -3 -12 -2 9.80783 2.45498 1
 -3 -12 -2 8.72322 3.06406 20
 3 12 2 11.239 4.01388 15
 3 12 2 10.779 3.09987 24
 3 12 2 9.26786 3.2737 21
 3 12 2 15.2545 3.4494 9
 3 12 2 8.04762 3.01829 1
 -4 -12 -2 -5.3758 3.11538 13
 -4 -12 -2 2.43413 4.19231 14
 -4 -12 -2 0.83928 3.5465 23
 -4 -12 -2 -1.2828 2.96895 1
 -4 -12 -2 2.02698 3.30809 20
 4 12 2 6.67152 4.08276 15
 4 12 2 -0.5159 2.92484 24
 4 12 2 3.18844 3.65744 9
 4 12 2 -1.77 2.89812 1
 6 -13 -2 -7.8003 3.5064 14
 6 -13 -2 0.02811 3.86734 23
 6 -13 -2 -4.4898 3.80733 1
 -6 13 2 2.34126 3.61227 1
 -6 13 2 -5.1988 4.0047 1
 -6 13 2 4.45511 3.91685 12
 -6 13 2 -1.2478 3.65976 21
 5 -13 -2 -4.228 3.62053 13
 5 -13 -2 1.21046 2.88416 1
 5 -13 -2 0.84343 3.13223 1
 5 -13 -2 -0.5078 2.70873 20
 5 -13 -2 -4.2436 3.42729 23
 -5 13 2 -1.6465 3.09957 21
 -5 13 2 4.38287 3.21073 1
 -5 13 2 0.61485 3.02537 1
 -5 13 2 -1.0699 3.39901 12
 -5 13 2 -6.6724 2.95683 17
 4 -13 -2 -3.9033 3.33861 23
 4 -13 -2 4.33951 2.69259 1
 4 -13 -2 3.90757 2.72103 1
 4 -13 -2 5.27374 3.39099 13
 -4 13 2 -6.4298 2.82618 24
 -4 13 2 4.1805 2.47052 21
 -4 13 2 -5.5352 2.65476 1
 -4 13 2 2.29651 2.99159 1
 3 -13 -2 6.08228 3.37607 23
 3 -13 -2 1.54534 2.51229 1
 3 -13 -2 2.69008 2.33386 1
 3 -13 -2 2.47194 2.25221 20
 3 -13 -2 3.7535 3.24964 13
 3 -13 -2 4.70792 2.84093 6
 -3 13 2 4.86236 3.00427 21
 -3 13 2 0.45273 2.92456 24
 -3 13 2 7.49597 2.60295 1
 2 -13 -2 15.3461 3.41564 13
 2 -13 -2 16.8767 3.03047 6
 2 -13 -2 19.6634 2.71845 20
 2 -13 -2 18.4737 3.65523 23
 2 -13 -2 16.3866 2.97428 1
 2 -13 -2 22.1156 2.8115 3
 2 -13 -2 18.28 2.88265 1
 -2 13 2 12.7781 3.45532 2
 -2 13 2 16.2516 3.26772 24
 -2 13 2 15.4932 3.11166 21
 -2 13 2 15.8995 2.80006 1
 1 -13 -2 0.43942 1.95876 20
 1 -13 -2 1.97092 2.90817 13
 1 -13 -2 0.6831 2.35341 1
 1 -13 -2 0.6974 3.07248 23
 1 -13 -2 0.7759 2.35954 1
 -1 13 2 -7.2504 2.55051 21
 -1 13 2 -1.5373 2.24513 1
 -1 13 2 5.81306 2.84172 24
 -1 13 2 3.53172 2.91247 2
 0 -13 -2 3.66685 2.33674 12
 0 -13 -2 8.98896 3.37537 23
 0 -13 -2 2.56708 2.33408 1
 0 -13 -2 6.33962 2.67062 1
 0 -13 -2 2.11492 2.91888 13
 0 -13 -2 7.37108 2.26352 20
 0 13 2 11.6535 2.87294 1
 0 13 2 6.20988 2.88262 2
 0 13 2 6.18224 2.96435 21
 0 13 2 5.63517 1.36323 19
 0 13 2 2.69774 2.73577 24
 -1 -13 -2 1.32051 2.94708 13
 -1 -13 -2 3.75832 2.29139 20
 -1 -13 -2 6.86904 2.36087 1
 -1 -13 -2 9.81739 3.44731 23
 -1 -13 -2 0.51021 2.51845 1
 -1 -13 -2 1.62596 2.47308 12
 1 13 2 8.0526 2.33232 1
 1 13 2 4.47442 2.72752 24
 1 13 2 -0.2015 2.92049 21
 -2 -13 -2 5.15497 2.96898 13
 -2 -13 -2 10.0964 3.02176 1
 -2 -13 -2 15.2508 3.88801 23
 -2 -13 -2 9.60899 2.28981 11
 -2 -13 -2 0.18765 2.85567 1
 -2 -13 -2 11.4931 3.0219 12
 -2 -13 -2 11.9581 3.32453 20
 2 13 2 9.76362 3.04884 1
 2 13 2 8.76337 3.14044 24
 2 13 2 7.67134 4.12008 15
 2 13 2 8.43791 3.68942 9
 2 13 2 10.8553 3.38263 21
 -3 -13 -2 -5.8305 3.00908 13
 -3 -13 -2 -1.0328 3.44155 23
 -3 -13 -2 0.60821 3.03645 1
 -3 -13 -2 -2.2526 2.7238 1
 -3 -13 -2 -1.0681 3.00624 20
 3 13 2 5.02639 3.32819 24
 3 13 2 -3.1864 4.29651 15
 3 13 2 1.41038 3.74765 9
 3 13 2 1.21582 3.34442 21
 5 -14 -2 -0.9517 4.27338 13
 5 -14 -2 5.31091 4.05663 1
 5 -14 -2 7.21306 3.83386 1
 5 -14 -2 11.1311 3.32834 20
 5 -14 -2 2.42706 3.91254 23
 -5 14 2 7.41973 3.88761 21
 -5 14 2 7.45303 4.03476 1
 4 -14 -2 11.6101 3.21056 1
 4 -14 -2 2.50849 3.09665 20
 4 -14 -2 6.17524 4.13692 13
 4 -14 -2 -0.9849 3.66335 23
 4 -14 -2 3.53653 3.28028 1
 -4 14 2 6.7211 3.26298 21
 -4 14 2 -1.3919 3.27794 1
 -4 14 2 3.98801 3.02025 1
 -4 14 2 -0.2721 3.00505 24
 3 -14 -2 -2.8223 3.70392 13
 3 -14 -2 0.43072 3.08083 1
 3 -14 -2 0.26201 2.99162 6
 3 -14 -2 0.55995 2.52191 1
 3 -14 -2 -0.2749 3.47605 23
 3 -14 -2 -1.6215 2.80716 20
 -3 14 2 4.03372 3.232 21
 -3 14 2 1.36778 2.92965 1
 -3 14 2 5.9156 3.2418 24
 -3 14 2 -5.015 3.26432 2
 2 -14 -2 3.00862 3.46252 23
 2 -14 -2 4.45237 3.82887 13
 2 -14 -2 10.6871 3.13549 1
 2 -14 -2 3.16869 1.54556 3
 2 -14 -2 5.83112 2.79575 1
 2 -14 -2 5.75492 3.15243 6
 -2 14 2 4.81664 3.26814 2
 -2 14 2 2.90162 3.23243 24
 -2 14 2 -0.4638 2.89352 21
 -2 14 2 2.4579 3.2181 1
 1 -14 -2 5.02191 2.56813 1
 1 -14 -2 0.70947 2.83103 1
 1 -14 -2 4.97217 3.45498 13
 1 -14 -2 3.17951 3.1835 23
 -1 14 2 3.53198 2.99866 21
 -1 14 2 4.94076 3.17863 2
 -1 14 2 1.36081 2.96527 24
 -1 14 2 0.96624 2.83191 1
 0 -14 -2 0.148 2.80692 20
 0 -14 -2 -3.9345 3.19449 13
 0 -14 -2 7.87283 3.45212 23
 0 -14 -2 1.12371 2.50032 1
 0 -14 -2 1.20602 2.92003 1
 0 14 2 1.12482 3.04915 2
 0 14 2 1.76032 3.27533 21
 0 14 2 4.8274 2.99965 24
 0 14 2 2.36936 2.8294 1
 -1 -14 -2 11.1904 2.99792 1
 -1 -14 -2 9.45168 3.22588 1
 -1 -14 -2 5.20811 3.28928 13
 -1 -14 -2 9.81327 3.03487 12
 -1 -14 -2 13.6362 3.88533 23
 -1 -14 -2 4.75542 3.12115 20
 1 14 2 7.5385 3.34079 21
 1 14 2 18.2631 3.42403 24
 1 14 2 8.59766 2.52745 19
 1 14 2 17.3343 3.40855 1
 -2 -14 -2 -2.7209 3.07193 1
 -2 -14 -2 0.33262 2.96305 20
 -2 -14 -2 6.37645 3.34529 12
 -2 -14 -2 4.70461 2.39721 11
 -2 -14 -2 -0.8016 3.091 1
 -2 -14 -2 4.74474 3.64912 23
 -2 -14 -2 7.04591 3.44792 13
 2 14 2 7.60026 3.5187 21
 2 14 2 6.52669 3.5214 1
 2 14 2 -0.0152 4.46207 15
 2 14 2 6.41995 4.60497 9
 2 14 2 1.24787 3.26043 24
 3 -15 -2 18.9251 4.16522 1
 3 -15 -2 24.7968 4.03448 6
 3 -15 -2 19.4103 4.68654 13
 3 -15 -2 19.6914 3.91124 1
 3 -15 -2 24.625 4.36474 23
 3 -15 -2 35.3071 4.48047 3
 3 -15 -2 27.0131 3.83967 20
 -3 15 2 21.1861 4.74621 2
 -3 15 2 23.2776 4.11129 21
 -3 15 2 21.3971 4.20822 1
 -3 15 2 23.3748 4.16803 24
 2 -15 -2 7.17451 3.70194 23
 2 -15 -2 9.79461 3.48649 1
 2 -15 -2 8.7472 4.60852 13
 2 -15 -2 4.31141 3.05523 20
 2 -15 -2 -0.8612 2.95462 1
 2 -15 -2 3.86979 3.68739 6
 -2 15 2 10.3683 4.25826 2
 -2 15 2 4.00994 3.48441 1
 -2 15 2 9.47234 3.26757 21
 -2 15 2 5.1755 3.45815 24
 1 -15 -2 -2.9523 3.03126 1
 1 -15 -2 1.1618 3.61037 23
 1 -15 -2 -1.2794 4.00978 13
 1 -15 -2 0.41233 2.87934 1
 1 -15 -2 -1.6574 2.68759 20
 -1 15 2 5.38353 3.21026 24
 -1 15 2 5.18863 3.78254 2
 -1 15 2 8.32834 3.44878 1
 -1 15 2 -1.2618 2.95039 21
 0 -15 -2 17.4155 4.21332 13
 0 -15 -2 19.3147 3.4552 1
 0 -15 -2 10.9838 3.58274 1
 0 -15 -2 12.7744 3.64772 20
 0 -15 -2 26.1511 4.41661 23
 0 15 2 20.3798 3.67117 24
 0 15 2 14.0677 3.94461 21
 0 15 2 22.0351 3.97587 1
 0 15 2 17.0932 4.05298 2
 1 15 2 0.67624 2.45701 19
 0 16 -3 14.7329 3.79394 21
 0 16 -3 19.9766 3.65459 24
 0 16 -3 16.0565 3.32511 2
 0 16 -3 11.7447 2.79498 7
 0 -16 3 20.1677 4.01805 13
 0 -16 3 19.9427 3.13439 1
 0 -16 3 12.8125 3.52026 20
 0 -16 3 22.4097 4.32277 23
 -1 16 -3 -1.3723 3.50201 2
 -1 16 -3 -0.0045 3.22938 24
 -1 16 -3 1.2027 3.33691 21
 -1 16 -3 7.72635 3.43876 1
 1 -16 3 1.66191 3.63232 23
 1 -16 3 -1.3504 3.35024 13
 1 -16 3 6.32282 3.01934 1
 1 -16 3 2.45494 3.15401 20
 1 -16 3 6.01671 3.17826 1
 -2 16 -3 15.7302 4.0144 21
 -2 16 -3 8.2143 3.40379 1
 2 -16 3 15.1889 3.95704 3
 2 -16 3 15.4407 3.91928 23
 2 -16 3 14.6589 3.73918 20
 2 -16 3 13.4364 3.21933 1
 2 -16 3 15.5559 4.4064 13
 2 -16 3 16.6579 3.61499 1
 2 15 -3 7.57927 3.39892 24
 2 15 -3 2.87347 3.54287 21
 2 15 -3 10.9222 3.3932 1
 -2 -15 3 3.92739 3.32331 20
 -2 -15 3 9.05528 3.60326 23
 -2 -15 3 -1.5665 2.84715 1
 -2 -15 3 10.6406 3.27381 1
 -2 -15 3 4.14087 4.23401 11
 1 15 -3 14.4051 3.41736 24
 1 15 -3 16.1526 3.55579 21
 1 15 -3 16.8236 3.38925 1
 -1 -15 3 17.6457 3.26188 1
 -1 -15 3 20.8349 3.50202 13
 -1 -15 3 17.837 3.12517 1
 -1 -15 3 17.123 4.32655 11
 -1 -15 3 16.9393 3.93372 23
 -1 -15 3 12.8303 3.5332 20
 0 15 -3 5.5872 2.81471 2
 0 15 -3 -6.3372 2.68707 1
 0 15 -3 0.93697 3.01264 24
 0 15 -3 1.16107 2.48805 7
 0 15 -3 7.25296 3.3252 21
 0 -15 3 3.9782 3.01229 20
 0 -15 3 3.13096 2.81025 1
 0 -15 3 0.73864 3.22354 23
 0 -15 3 7.75299 3.00288 13
 0 -15 3 -0.187 2.44929 1
 -1 15 -3 19.6322 3.58703 24
 -1 15 -3 23.6844 3.82542 21
 -1 15 -3 26.471 3.57602 1
 1 -15 3 22.5208 3.10137 1
 1 -15 3 21.9823 3.34947 1
 1 -15 3 23.6371 3.74916 20
 1 -15 3 19.0143 3.82932 23
 1 -15 3 18.9962 3.86052 13
 -2 15 -3 15.6945 3.29881 1
 -2 15 -3 15.9113 3.5552 24
 -2 15 -3 19.5157 3.74635 21
 2 -15 3 8.18912 3.33788 20
 2 -15 3 18.0662 3.64206 3
 2 -15 3 22.8632 3.18178 1
 2 -15 3 14.0624 3.33105 1
 2 -15 3 12.7376 3.88081 23
 2 -15 3 14.1817 3.96125 13
 -3 15 -3 2.05567 3.55465 21
 -3 15 -3 0.37224 2.97764 1
 -3 15 -3 -6.646 3.08487 24
 3 -15 3 -0.3969 2.74654 22
 3 -15 3 2.67957 2.73311 1
 3 -15 3 5.79948 3.94388 3
 3 -15 3 2.25561 3.22129 20
 3 -15 3 2.44361 3.64793 14
 3 -15 3 3.87748 3.14524 1
 3 -15 3 -7.8008 3.0922 23
 3 -15 3 -1.8617 3.94508 13
 -4 15 -3 16.2653 3.6493 1
 -4 15 -3 13.5163 4.85408 13
 -4 15 -3 22.3033 3.58718 1
 -4 15 -3 17.0667 4.19834 21
 4 -15 3 8.17749 3.64085 1
 4 -15 3 19.8668 3.80348 20
 4 -15 3 21.4957 3.44286 1
 4 -15 3 15.2648 3.23791 22
 4 -15 3 9.09676 3.59169 14
 4 -15 3 7.55616 4.83497 13
 4 -15 3 15.8811 4.46804 23
 3 14 -3 13.9533 2.65388 1
 3 14 -3 8.81136 3.3337 21
 3 14 -3 4.52613 3.4325 24
 -3 -14 3 17.3209 4.03137 23
 -3 -14 3 10.1429 3.18109 13
 -3 -14 3 6.55866 2.9144 1
 -3 -14 3 -1.8338 3.0896 1
 -3 -14 3 9.05478 3.61742 11
 -3 -14 3 4.32936 3.36574 20
 2 14 -3 18.9123 3.57051 24
 2 14 -3 22.445 3.6745 21
 -2 -14 3 24.0856 4.05806 23
 -2 -14 3 15.0688 3.4479 20
 -2 -14 3 33.5806 3.84671 13
 -2 -14 3 21.6358 5.74785 21
 -2 -14 3 23.3338 4.04348 11
 -2 -14 3 24.6639 3.46989 1
 -2 -14 3 11.1322 3.25939 1
 1 14 -3 8.09714 3.05755 21
 1 14 -3 7.91487 3.09965 24
 1 14 -3 6.80085 1.90176 2
 1 14 -3 15.5332 3.12995 1
 -1 -14 3 8.70813 2.60521 13
 -1 -14 3 9.54761 3.60751 23
 -1 -14 3 9.36745 2.84033 1
 -1 -14 3 12.4309 3.70305 11
 -1 -14 3 10.4581 2.34629 1
 0 14 -3 4.60499 1.80143 19
 0 14 -3 5.32846 2.73131 1
 0 14 -3 5.78357 2.86025 21
 0 14 -3 1.09328 2.92989 24
 0 14 -3 5.32649 2.38281 7
 0 14 -3 6.37576 2.42271 2
 0 -14 3 4.27688 2.73041 1
 0 -14 3 7.58966 2.84185 13
 0 -14 3 5.46035 2.40503 1
 0 -14 3 12.6015 3.2055 23
 -1 14 -3 40.4727 4.15127 24
 -1 14 -3 47.0947 4.49594 1
 -1 14 -3 47.3077 4.79405 21
 1 -14 3 49.1792 4.3533 1
 1 -14 3 37.9537 4.71018 13
 1 -14 3 41.0505 4.44807 1
 1 -14 3 42.9411 4.40382 3
 1 -14 3 40.9736 5.20703 23
 -2 14 -3 -1.294 1.92915 1
 -2 14 -3 10.3937 3.20096 24
 -2 14 -3 11.2451 3.28151 21
 2 -14 3 5.83098 3.44801 23
 2 -14 3 10.3396 2.44894 1
 2 -14 3 4.284 2.08926 1
 2 -14 3 4.85844 3.101 13
 2 -14 3 7.94495 3.22996 3
 -3 14 -3 80.3925 5.3974 1
 -3 14 -3 93.9417 6.21281 21
 -3 14 -3 83.0249 5.6629 1
 -3 14 -3 74.6674 6.36027 13
 3 -14 3 80.4301 5.61838 1
 3 -14 3 87.2215 6.4287 3
 3 -14 3 88.918 5.43388 1
 3 -14 3 71.5984 6.17159 14
 3 -14 3 77.941 5.12286 20
 3 -14 3 86.7294 6.74524 13
 3 -14 3 88.3743 4.61517 22
 3 -14 3 77.0208 6.20084 23
 -4 14 -3 28.3939 3.50451 1
 -4 14 -3 23.9314 3.69127 1
 -4 14 -3 32.4015 4.14204 21
 -4 14 -3 22.5829 4.34203 13
 4 -14 3 28.4522 3.70967 20
 4 -14 3 24.1567 2.96531 22
 4 -14 3 21.7272 2.90475 1
 4 -14 3 27.417 4.39386 23
 4 -14 3 25.5318 3.96011 14
 4 -14 3 20.3225 3.58919 1
 4 -14 3 23.4994 4.66625 13
 -5 14 -3 -2.1741 3.03969 1
 -5 14 -3 -0.1537 2.50554 10
 -5 14 -3 -3.0689 3.23259 21
 -5 14 -3 3.12749 4.25492 13
 -5 14 -3 -0.7449 2.93463 12
 5 -14 3 7.64102 3.09225 1
 5 -14 3 1.20128 2.52464 22
 5 -14 3 1.5468 3.38989 20
 5 -14 3 -3.4801 3.71328 23
 5 -14 3 2.2501 3.32455 1
 5 -14 3 -1.0528 4.27881 13
 5 -14 3 2.30606 3.40742 14
 4 13 -3 4.06845 3.02635 24
 4 13 -3 -1.6763 3.17746 9
 4 13 -3 0.89351 3.2557 1
 -4 -13 3 0.31237 3.65665 23
 -4 -13 3 5.56062 3.48729 14
 -4 -13 3 -2.538 5.28418 21
 -4 -13 3 4.12458 3.08276 20
 -4 -13 3 0.69391 3.32959 13
 -4 -13 3 -1.779 2.58913 1
 -4 -13 3 5.92553 3.03023 1
 3 13 -3 48.722 4.54255 24
 3 13 -3 54.0584 5.29356 21
 3 13 -3 65.3048 5.19918 1
 -3 -13 3 50.1191 4.80544 20
 -3 -13 3 56.0369 5.69982 23
 -3 -13 3 51.4093 5.63216 21
 -3 -13 3 49.3597 4.66181 1
 -3 -13 3 50.4419 5.26184 11
 -3 -13 3 50.3765 4.97157 13
 -3 -13 3 49.1508 4.80056 1
 2 13 -3 4.6658 2.7675 24
 2 13 -3 9.34433 2.75719 1
 2 13 -3 7.41945 2.81472 21
 -2 -13 3 6.85241 3.49837 23
 -2 -13 3 2.04616 2.54259 1
 -2 -13 3 8.32411 2.58664 1
 -2 -13 3 3.44207 2.45324 20
 -2 -13 3 4.56376 2.74668 13
 -2 -13 3 8.58647 3.1932 11
 -2 -13 3 5.90824 4.04913 21
 1 13 -3 12.819 2.94697 1
 1 13 -3 7.04809 1.72668 2
 1 13 -3 4.67125 2.76411 21
 1 13 -3 6.56873 3.36317 19
 1 13 -3 12.1697 2.94095 24
 -1 -13 3 8.15425 2.65012 13
 -1 -13 3 7.20628 2.33787 20
 -1 -13 3 8.79469 3.10603 11
 -1 -13 3 5.91931 2.49243 1
 -1 -13 3 9.13128 2.77575 1
 -1 -13 3 7.63202 3.26943 23
 0 13 -3 76.3231 3.72088 19
 0 13 -3 85.9557 4.40259 7
 0 13 -3 84.7594 5.20776 21
 0 13 -3 86.0038 4.85894 1
 0 13 -3 88.7644 4.83126 24
 0 -13 3 80.3932 4.38475 20
 0 -13 3 87.599 5.47404 13
 0 -13 3 91.2196 5.67486 23
 0 -13 3 83.3762 5.09186 1
 0 -13 3 78.4636 4.73246 1
 -1 13 -3 0.40956 1.81448 7
 -1 13 -3 0.17369 2.27098 1
 -1 13 -3 0.56657 2.54575 21
 -1 13 -3 5.01293 2.77574 24
 1 -13 3 -2.6948 2.63773 23
 1 -13 3 0.77269 1.99064 20
 1 -13 3 -2.5836 2.28032 13
 1 -13 3 3.66489 2.22209 1
 1 -13 3 0.00965 2.35008 3
 -2 13 -3 55.0771 4.9834 21
 -2 13 -3 42.0893 4.41852 1
 -2 13 -3 57.4589 5.12133 13
 -2 13 -3 47.1623 4.23959 24
 2 -13 3 58.5187 3.76315 20
 2 -13 3 49.966 4.80002 13
 2 -13 3 52.8855 2.02339 6
 2 -13 3 50.7924 5.0742 23
 2 -13 3 57.7913 4.58976 1
 2 -13 3 57.2115 4.39108 1
 2 -13 3 61.3006 4.81519 3
 -3 13 -3 56.9331 4.4552 1
 -3 13 -3 47.5594 4.55892 1
 -3 13 -3 56.5894 5.37129 13
 -3 13 -3 43.3804 4.31341 24
 -3 13 -3 50.3473 5.01867 21
 3 -13 3 50.6867 5.17825 13
 3 -13 3 46.5934 5.22746 23
 3 -13 3 40.136 4.26161 14
 3 -13 3 41.8525 3.52335 20
 3 -13 3 39.8705 4.37759 1
 3 -13 3 48.8701 3.7325 22
 3 -13 3 46.8943 4.26119 1
 -4 13 -3 16.0066 3.36117 21
 -4 13 -3 14.7374 3.60039 13
 -4 13 -3 10.7334 2.92539 1
 -4 13 -3 10.5613 2.23758 12
 -4 13 -3 19.0313 2.98782 1
 4 -13 3 15.0399 3.82769 13
 4 -13 3 15.678 2.852 1
 4 -13 3 11.6972 3.78664 23
 4 -13 3 11.1185 3.20966 1
 4 -13 3 10.969 3.21805 14
 4 -13 3 13.5178 2.35505 22
 -5 13 -3 40.9713 4.75037 1
 -5 13 -3 37.0083 3.77212 10
 -5 13 -3 39.0946 4.45905 21
 -5 13 -3 52.9462 4.75385 1
 -5 13 -3 40.7896 4.73152 12
 -5 13 -3 37.6775 4.71481 13
 5 -13 3 46.6171 4.9738 1
 5 -13 3 28.3675 3.63701 1
 5 -13 3 35.9877 3.77164 20
 5 -13 3 40.6389 5.08506 13
 5 -13 3 56.978 5.24629 14
 5 -13 3 37.9799 3.36188 22
 5 -13 3 42.5932 5.39335 23
 -6 13 -3 5.13478 3.49078 21
 -6 13 -3 3.00401 2.87168 1
 -6 13 -3 -0.2296 3.67712 12
 -6 13 -3 -6.2039 3.1984 1
 -6 13 -3 -2.1153 4.53379 13
 6 -13 3 -5.8768 2.24397 1
 6 -13 3 2.22093 3.14678 14
 6 -13 3 -0.9331 3.73814 23
 6 -13 3 4.13744 3.25709 1
 6 -13 3 -2.0777 2.96212 20
 5 12 -3 -1.1929 2.20539 9
 5 12 -3 2.34939 2.45486 15
 5 12 -3 -0.5983 3.20362 24
 5 12 -3 -4.0259 2.97842 1
 5 12 -3 -0.7475 3.14124 3
 -5 -12 3 1.16477 3.21936 14
 -5 -12 3 5.09461 5.20296 21
 -5 -12 3 -3.7597 3.17757 1
 -5 -12 3 -4.5004 3.3642 13
 -5 -12 3 3.96621 3.67886 23
 -5 -12 3 -2.9224 2.91927 20
 4 12 -3 25.9486 3.74826 1
 4 12 -3 24.8388 3.554 24
 4 12 -3 25.569 3.26389 3
 -4 -12 3 26.5052 3.79693 13
 -4 -12 3 26.1398 3.65582 20
 -4 -12 3 25.5294 3.60727 1
 -4 -12 3 34.6563 4.73674 21
 -4 -12 3 30.5602 4.11085 23
 -4 -12 3 32.6911 3.59737 14
 3 12 -3 18.3601 3.20518 24
 3 12 -3 17.009 2.94658 21
 3 12 -3 20.9704 3.2312 1
 -3 -12 3 21.9957 3.44469 13
 -3 -12 3 17.2426 2.70499 20
 -3 -12 3 19.6471 3.09976 11
 -3 -12 3 14.7457 2.88625 1
 -3 -12 3 17.7498 3.68622 23
 -3 -12 3 18.4617 3.98435 21
 -3 -12 3 19.982 3.00987 1
 2 12 -3 35.5706 3.52322 1
 2 12 -3 28.5538 3.43255 24
 2 12 -3 26.184 3.15406 21
 -2 -12 3 27.1674 3.13405 1
 -2 -12 3 27.6581 3.50607 13
 -2 -12 3 31.8416 4.14898 11
 -2 -12 3 30.6986 3.81368 21
 -2 -12 3 23.8723 2.78969 20
 -2 -12 3 30.2524 3.89214 23
 -2 -12 3 26.6745 3.07647 1
 1 12 -3 22.5767 3.07575 1
 1 12 -3 11.8505 1.70605 2
 1 12 -3 15.3968 3.04968 19
 1 12 -3 10.3408 2.66253 21
 -1 -12 3 11.6603 2.23389 20
 -1 -12 3 15.2637 2.86595 11
 -1 -12 3 15.4724 2.86453 13
 -1 -12 3 16.5348 2.83221 1
 -1 -12 3 15.8639 3.32068 23
 -1 -12 3 14.1036 2.70276 1
 -1 -12 3 11.506 3.45788 21
 0 12 -3 0.32001 1.8621 7
 0 12 -3 0.23294 1.79834 19
 0 12 -3 2.4591 1.7197 24
 0 12 -3 -2.742 2.2443 21
 0 12 -3 0.48783 2.21342 1
 0 -12 3 -4.4622 2.138 1
 0 -12 3 0.04283 2.3933 13
 0 -12 3 1.65527 2.7701 23
 0 -12 3 -3.0194 1.95153 1
 0 -12 3 1.10044 1.76565 20
 -1 12 -3 -1.8274 2.30497 21
 -1 12 -3 1.34897 1.68475 7
 -1 12 -3 -2.8183 1.61491 24
 -1 12 -3 5.16145 2.31643 1
 1 -12 3 -0.0903 2.24977 13
 1 -12 3 -0.349 2.68173 23
 1 -12 3 -0.2171 1.49425 1
 1 -12 3 0.51364 2.03048 3
 1 -12 3 -0.3805 1.26333 20
 1 -12 3 -3.4886 2.13357 1
 -2 12 -3 59.7499 4.6962 13
 -2 12 -3 47.1315 4.32808 1
 -2 12 -3 51.3716 4.14843 1
 -2 12 -3 54.7945 4.8648 21
 2 -12 3 53.5539 4.88456 23
 2 -12 3 53.9209 3.12289 20
 2 -12 3 58.4299 4.62706 13
 2 -12 3 61.039 4.45289 1
 2 -12 3 59.979 4.28877 1
 2 -12 3 60.0644 4.45126 3
 -3 12 -3 2.48179 2.68285 21
 -3 12 -3 2.13348 1.39694 12
 -3 12 -3 2.70092 2.68737 13
 -3 12 -3 -0.6864 2.25252 1
 -3 12 -3 6.26433 2.38666 1
 -3 12 -3 1.67987 2.18911 24
 3 -12 3 2.89775 2.73158 13
 3 -12 3 -1.6077 2.21863 1
 3 -12 3 -1.5657 2.9997 23
 3 -12 3 3.50058 2.003 22
 3 -12 3 1.94295 2.51368 14
 3 -12 3 -2.413 2.17893 1
 3 -12 3 4.29748 1.96981 20
 -4 12 -3 19.7786 3.23957 21
 -4 12 -3 17.1446 3.12803 1
 -4 12 -3 19.5704 2.61678 10
 -4 12 -3 16.4645 3.42959 13
 -4 12 -3 20.1945 2.35923 12
 -4 12 -3 21.0374 2.98491 1
 4 -12 3 20.481 3.33261 14
 4 -12 3 15.515 3.6752 23
 4 -12 3 13.3059 3.15579 1
 4 -12 3 15.7455 2.75205 1
 4 -12 3 17.9758 2.20599 22
 4 -12 3 20.9106 2.86229 20
 4 -12 3 22.2145 3.46452 13
 -5 12 -3 5.31195 2.78526 1
 -5 12 -3 10.8217 3.40099 21
 -5 12 -3 6.69349 2.07004 10
 -5 12 -3 8.64884 2.69914 1
 -5 12 -3 4.91302 3.56113 13
 5 -12 3 5.01969 2.94587 1
 5 -12 3 0.06815 2.27276 1
 5 -12 3 8.60795 1.92762 22
 5 -12 3 9.04753 3.58216 13
 5 -12 3 12.0423 3.73701 23
 5 -12 3 6.53496 2.73986 14
 -6 12 -3 18.4357 4.32717 13
 -6 12 -3 21.0166 4.0158 21
 -6 12 -3 19.9188 2.96409 1
 -6 12 -3 16.8871 3.19879 1
 6 -12 3 20.8081 3.42416 14
 6 -12 3 25.0932 3.65073 1
 6 -12 3 13.9205 2.76082 1
 6 -12 3 16.9261 2.63862 4
 6 -12 3 14.2846 3.35015 7
 6 -12 3 17.0847 3.5348 20
 6 -12 3 13.6941 4.01865 23
 6 -12 3 15.4711 2.242 19
 6 11 -3 2.15493 4.02899 3
 6 11 -3 -0.7553 3.1672 1
 -6 -11 3 -5.0689 4.59321 8
 -6 -11 3 -0.9729 3.84935 23
 -6 -11 3 -6.9491 4.34835 13
 -6 -11 3 -1.697 3.19706 14
 -6 -11 3 -7.9988 3.23626 1
 5 11 -3 13.6726 3.36024 3
 5 11 -3 12.608 1.9358 9
 5 11 -3 14.6486 3.30786 24
 5 11 -3 18.5967 3.61417 1
 -5 -11 3 12.1793 3.95731 23
 -5 -11 3 15.7783 3.48508 20
 -5 -11 3 15.4121 4.2678 8
 -5 -11 3 14.4757 4.23871 21
 -5 -11 3 15.1697 3.07056 14
 -5 -11 3 7.60242 3.60627 13
 -5 -11 3 11.1345 2.89813 1
 4 11 -3 16.159 3.13006 24
 4 11 -3 12.503 3.00893 1
 4 11 -3 16.775 2.83046 3
 -4 -11 3 15.8611 3.53269 21
 -4 -11 3 15.0798 2.99934 1
 -4 -11 3 16.6866 2.61478 20
 -4 -11 3 15.4654 2.76061 14
 -4 -11 3 14.9454 3.54255 23
 -4 -11 3 12.4924 3.11788 13
 3 11 -3 2.49111 2.30085 21
 3 11 -3 0.54777 2.49312 1
 -3 -11 3 5.79035 2.30734 13
 -3 -11 3 5.65325 2.39592 11
 -3 -11 3 3.28758 2.35442 1
 -3 -11 3 1.10964 2.27944 1
 -3 -11 3 7.15122 2.06243 20
 -3 -11 3 9.87331 3.14303 23
 -3 -11 3 8.17817 2.97626 21
 2 11 -3 29.624 2.75003 24
 2 11 -3 25.3987 2.75281 21
 2 11 -3 32.1234 3.89341 1
 -2 -11 3 33.7535 3.50156 11
 -2 -11 3 33.7849 4.31856 23
 -2 -11 3 27.12 3.31194 1
 -2 -11 3 27.8786 3.3053 13
 -2 -11 3 25.5401 2.63268 20
 -2 -11 3 26.4808 3.19003 1
 -2 -11 3 29.5699 3.29156 21
 1 11 -3 -2.2336 1.99596 21
 1 11 -3 1.34386 1.55447 24
 1 11 -3 3.36812 2.23814 1
 1 11 -3 -0.9693 2.38871 19
 1 11 -3 0.58062 1.26127 2
 -1 -11 3 0.2669 2.5589 23
 -1 -11 3 1.677 2.11613 1
 -1 -11 3 -0.053 2.42935 21
 -1 -11 3 -0.5433 2.07302 13
 -1 -11 3 -1.4893 1.42895 20
 -1 -11 3 -3.0522 1.73861 1
 0 11 -3 10.5082 1.82946 19
 0 11 -3 8.68676 2.59626 1
 0 11 -3 11.8799 1.94862 24
 0 11 -3 9.20632 2.26043 21
 0 11 -3 9.4622 2.0063 7
 0 -11 3 13.0981 2.79021 23
 0 -11 3 7.60381 2.3085 1
 0 -11 3 11.9436 2.13676 20
 0 -11 3 9.77666 2.5259 13
 0 -11 3 7.26232 2.5161 1
 -1 11 -3 2.58878 2.31034 1
 -1 11 -3 5.38277 1.66654 7
 -1 11 -3 5.00435 2.45954 13
 -1 11 -3 3.62115 1.36818 24
 -1 11 -3 3.75701 2.25145 21
 1 -11 3 3.57303 1.9075 20
 1 -11 3 6.14788 2.15677 3
 1 -11 3 2.09719 2.70763 23
 1 -11 3 2.24674 2.15058 13
 1 -11 3 2.09286 2.24371 1
 1 -11 3 4.09904 2.11766 1
 -2 11 -3 48.4675 4.07239 1
 -2 11 -3 47.4025 3.60502 1
 -2 11 -3 49.5484 3.14306 24
 -2 11 -3 50.228 4.16681 21
 -2 11 -3 59.9717 4.31451 13
 2 -11 3 61.1865 3.81126 1
 2 -11 3 57.2471 4.17466 1
 2 -11 3 47.2023 3.1608 20
 2 -11 3 58.2113 4.21633 13
 2 -11 3 56.6262 4.21088 3
 2 -11 3 48.8675 4.48769 23
 -3 11 -3 7.80405 1.54721 12
 -3 11 -3 10.55 2.20155 24
 -3 11 -3 6.06561 2.61827 21
 -3 11 -3 7.25124 2.58957 13
 -3 11 -3 6.21382 2.34105 1
 -3 11 -3 7.05763 2.55767 1
 3 -11 3 9.76014 2.60678 1
 3 -11 3 5.42403 1.92086 20
 3 -11 3 8.59095 1.84455 22
 3 -11 3 3.99289 2.68693 23
 3 -11 3 10.8724 2.68941 13
 3 -11 3 9.49024 2.38853 1
 3 -11 3 9.68662 2.61989 14
 -4 11 -3 -2.7726 2.47792 13
 -4 11 -3 4.30601 2.29868 21
 -4 11 -3 5.76046 2.29999 1
 -4 11 -3 1.97171 1.88626 10
 -4 11 -3 -1.0619 1.70221 1
 4 -11 3 -1.4268 2.87257 23
 4 -11 3 0.49967 1.63592 22
 4 -11 3 1.36415 0.94524 19
 4 -11 3 2.85943 1.89497 1
 4 -11 3 5.62448 2.03832 20
 4 -11 3 1.28165 2.22981 1
 4 -11 3 5.04508 2.3173 14
 4 -11 3 -1.9199 2.57077 13
 -5 11 -3 -1.4478 2.91226 21
 -5 11 -3 2.64221 2.36978 1
 -5 11 -3 1.38927 2.75544 13
 -5 11 -3 2.30395 2.27461 1
 5 -11 3 0.50808 2.10373 1
 5 -11 3 2.04599 2.60005 14
 5 -11 3 6.10729 3.18759 23
 5 -11 3 3.00337 1.83791 20
 5 -11 3 2.25246 1.57338 19
 5 -11 3 4.11415 1.63566 22
 5 -11 3 -0.3551 2.22792 7
 5 -11 3 -1.7296 2.2376 1
 -6 11 -3 14.0756 3.51567 21
 -6 11 -3 4.40875 2.09901 1
 -6 11 -3 13.9093 2.91994 1
 -6 11 -3 5.6764 3.55248 13
 6 -11 3 7.79121 3.00692 14
 6 -11 3 14.4633 2.4028 1
 6 -11 3 6.80233 3.09251 20
 6 -11 3 14.6287 3.13401 1
 6 -11 3 11.7647 3.19134 7
 6 -11 3 8.1044 2.37756 19
 6 -11 3 9.09858 3.44148 23
 6 -11 3 10.1639 1.95796 4
 -7 11 -3 0.11716 3.17774 1
 -7 11 -3 6.70521 3.47645 21
 -7 11 -3 10.1337 3.17255 1
 -7 11 -3 -2.1506 3.88663 13
 7 -11 3 1.38059 3.43462 20
 7 -11 3 0.74862 3.75598 23
 7 -11 3 4.87173 3.26772 14
 7 -11 3 1.24407 3.32953 1
 7 -11 3 4.61024 3.91482 7
 7 -11 3 11.5285 3.12301 1
 7 -11 3 8.52704 3.20357 19
 6 10 -3 0.58729 2.90989 24
 6 10 -3 -1.4687 2.944 1
 -6 -10 3 -2.6026 2.68864 14
 -6 -10 3 2.95902 3.09746 20
 -6 -10 3 2.22903 3.86724 13
 -6 -10 3 0.1122 4.2168 21
 -6 -10 3 -2.6921 3.79173 8
 5 10 -3 12.9881 3.13447 1
 5 10 -3 16.5919 3.23089 24
 5 10 -3 17.1426 3.30877 3
 -5 -10 3 15.6093 3.67865 23
 -5 -10 3 14.0827 2.59819 14
 -5 -10 3 15.2867 2.60873 20
 -5 -10 3 12.2985 3.07351 1
 -5 -10 3 13.2224 3.86904 8
 -5 -10 3 9.38907 3.3521 13
 -5 -10 3 15.8241 3.524 21
 4 10 -3 -0.5865 2.44188 1
 4 10 -3 2.55383 2.52223 24
 4 10 -3 1.05649 2.27144 3
 -4 -10 3 -1.1045 1.75614 20
 -4 -10 3 5.05534 2.7123 13
 -4 -10 3 3.35747 2.10978 14
 -4 -10 3 -3.54 2.10454 1
 -4 -10 3 0.6137 2.93408 23
 -4 -10 3 3.18363 2.73868 21
 3 10 -3 50.2571 3.66234 1
 3 10 -3 49.4858 3.59374 3
 3 10 -3 54.909 3.24895 24
 3 10 -3 50.851 3.77461 21
 -3 -10 3 58.1691 3.45274 20
 -3 -10 3 54.9275 3.87126 13
 -3 -10 3 55.8589 4.29894 21
 -3 -10 3 55.5434 3.78248 11
 -3 -10 3 53.2796 4.27783 1
 -3 -10 3 58.9851 4.65484 23
 2 10 -3 52.5655 4.13052 1
 2 10 -3 49.6751 3.75587 21
 2 10 -3 48.7267 2.95942 24
 -2 -10 3 55.7132 4.06106 1
 -2 -10 3 45.1696 3.92435 1
 -2 -10 3 50.0907 3.61823 13
 -2 -10 3 48.2295 3.70972 11
 -2 -10 3 46.0333 3.13802 20
 -2 -10 3 47.3133 4.32773 23
 -2 -10 3 52.7957 4.14693 21
 1 10 -3 8.40004 2.38159 1
 1 10 -3 6.23502 2.06217 21
 1 10 -3 10.4859 2.28267 19
 1 10 -3 10.3678 1.35523 2
 1 10 -3 9.17019 1.58673 24
 -1 -10 3 6.78925 2.22955 1
 -1 -10 3 6.22625 2.38598 13
 -1 -10 3 9.55292 2.45032 21
 -1 -10 3 7.37297 1.83681 20
 -1 -10 3 8.13579 2.3039 1
 -1 -10 3 11.1683 2.71661 23
 0 10 -3 54.9815 3.05488 24
 0 10 -3 62.767 2.89107 19
 0 10 -3 59.5804 3.96843 21
 0 10 -3 63.885 3.2807 23
 0 10 -3 62.5511 4.0977 1
 0 -10 3 65.4994 4.06532 1
 0 -10 3 59.2882 3.43474 3
 0 -10 3 56.4019 3.64841 13
 0 -10 3 57.7954 3.97696 1
 0 -10 3 54.3684 3.19072 20
 0 -10 3 56.0414 4.25211 23
 -1 10 -3 14.4485 1.76546 23
 -1 10 -3 14.1374 2.26688 21
 -1 10 -3 18.316 2.46387 13
 -1 10 -3 15.9938 2.60325 1
 -1 10 -3 15.4146 2.01243 24
 -1 10 -3 17.7173 2.38949 7
 1 -10 3 12.6157 2.36851 13
 1 -10 3 18.1597 2.36094 3
 1 -10 3 9.85238 2.72577 23
 1 -10 3 17.4622 2.52918 1
 1 -10 3 13.5446 2.52566 1
 1 -10 3 16.4812 2.12941 20
 -2 10 -3 -0.1969 2.06342 1
 -2 10 -3 -0.7655 1.97852 21
 -2 10 -3 -2.8407 1.95239 13
 -2 10 -3 -1.6104 1.99142 1
 -2 10 -3 -1.2512 1.30888 24
 -2 10 -3 -0.1101 1.46639 23
 -2 10 -3 1.37723 0.84442 12
 2 -10 3 -1.3456 1.43058 20
 2 -10 3 -1.6995 1.75751 14
 2 -10 3 -1.4875 2.3696 23
 2 -10 3 -0.2849 2.01028 1
 2 -10 3 0.30157 1.98613 13
 2 -10 3 0.68162 1.9151 1
 -3 10 -3 25.4552 3.1088 1
 -3 10 -3 33.0408 3.17909 21
 -3 10 -3 29.0552 2.52995 24
 -3 10 -3 29.1457 3.47552 13
 -3 10 -3 30.2757 3.47423 1
 3 -10 3 26.2671 3.33799 1
 3 -10 3 26.255 3.0058 14
 3 -10 3 18.0176 3.22362 23
 3 -10 3 26.0675 2.38258 22
 3 -10 3 28.3695 3.53404 1
 3 -10 3 28.8492 3.51949 13
 3 -10 3 23.2206 2.49899 20
 -4 10 -3 13.5584 2.54882 1
 -4 10 -3 9.92322 1.92124 10
 -4 10 -3 8.2662 2.35604 1
 -4 10 -3 13.787 2.78604 21
 -4 10 -3 11.7382 2.54547 13
 4 -10 3 9.94045 2.99112 23
 4 -10 3 13.1743 2.64936 14
 4 -10 3 11.6951 2.20372 20
 4 -10 3 13.4695 2.66996 13
 4 -10 3 9.79452 1.57848 22
 4 -10 3 13.4454 2.58399 1
 4 -10 3 12.1829 2.41542 1
 4 -10 3 9.16244 2.06991 7
 4 -10 3 9.52111 1.41118 19
 -5 10 -3 20.7037 3.07973 1
 -5 10 -3 17.2955 3.38222 21
 -5 10 -3 15.8845 2.6625 1
 -5 10 -3 15.035 3.1418 13
 5 -10 3 20.6296 2.1755 22
 5 -10 3 19.1743 2.67637 20
 5 -10 3 12.2449 2.79259 14
 5 -10 3 16.5281 2.13251 19
 5 -10 3 28.6725 3.47275 1
 5 -10 3 18.6543 2.89554 1
 5 -10 3 16.4672 3.47296 23
 5 -10 3 21.1637 2.84366 7
 -6 10 -3 9.28824 3.27765 21
 -6 10 -3 6.35249 2.62967 1
 -6 10 -3 8.57602 3.21338 13
 -6 10 -3 12.7233 2.69534 1
 6 -10 3 6.87933 2.49136 1
 6 -10 3 8.62299 2.52519 14
 6 -10 3 6.74921 2.48258 19
 6 -10 3 10.4498 3.09477 7
 6 -10 3 11.834 2.83298 1
 6 -10 3 13.8134 3.37038 23
 -7 10 -3 -0.874 3.74425 13
 -7 10 -3 -3.0141 2.61266 1
 -7 10 -3 -1.9046 2.85612 1
 -7 10 -3 8.45768 3.46739 21
 7 -10 3 -1.3298 2.81414 14
 7 -10 3 -1.2999 2.67873 1
 7 -10 3 -2.8321 2.86541 1
 7 -10 3 1.08346 3.06639 20
 7 -10 3 -5.3681 3.26675 23
 7 -10 3 0.89453 3.72987 7
 7 9 -3 6.10182 3.665 1
 7 9 -3 6.3202 3.24839 24
 7 9 -3 9.20365 3.28992 1
 -7 -9 3 -0.7029 3.07355 20
 -7 -9 3 5.43037 2.97007 14
 -7 -9 3 10.1519 4.43784 8
 -7 -9 3 -4.2624 4.65201 13
 6 9 -3 2.01919 2.68071 24
 6 9 -3 7.7633 3.10526 1
 -6 -9 3 2.67948 3.49055 21
 -6 -9 3 2.98371 3.39038 8
 -6 -9 3 1.14703 3.52163 13
 -6 -9 3 4.15413 2.35237 20
 -6 -9 3 -4.0691 2.41131 1
 -6 -9 3 0.56041 2.41768 14
 5 9 -3 4.72735 2.65156 24
 5 9 -3 1.21445 2.63866 1
 -5 -9 3 0.23131 1.84216 20
 -5 -9 3 2.69847 1.90543 14
 -5 -9 3 -0.6821 2.36663 1
 -5 -9 3 -4.7077 2.75826 8
 -5 -9 3 1.29674 2.75355 21
 -5 -9 3 -3.2787 2.64998 13
 4 9 -3 30.4544 3.604 3
 4 9 -3 30.187 3.88159 1
 4 9 -3 29.933 2.74685 24
 -4 -9 3 25.3043 3.16835 1
 -4 -9 3 26.3013 2.80548 21
 -4 -9 3 34.0849 2.87126 20
 -4 -9 3 24.0137 3.20703 13
 -4 -9 3 33.0096 4.2388 23
 -4 -9 3 31.9211 3.11156 14
 3 9 -3 118.454 5.61307 1
 3 9 -3 126.553 4.64933 24
 3 9 -3 123.32 4.73186 21
 3 9 -3 114.819 4.83107 3
 -3 -9 3 117.754 5.70064 23
 -3 -9 3 123.002 4.71283 20
 -3 -9 3 123.198 5.63003 1
 -3 -9 3 119.073 4.97174 21
 -3 -9 3 126.819 5.81922 13
 -3 -9 3 125.982 4.98694 11
 2 9 -3 9.89916 1.83768 24
 2 9 -3 7.24364 1.79721 21
 2 9 -3 9.25472 1.87937 3
 2 9 -3 12.2479 2.45426 1
 -2 -9 3 11.7692 2.26799 1
 -2 -9 3 10.8572 2.14826 23
 -2 -9 3 12.2376 1.94693 20
 -2 -9 3 4.70036 2.09233 1
 -2 -9 3 13.6858 2.1367 21
 -2 -9 3 11.2453 2.2043 11
 -2 -9 3 7.72778 2.40746 13
 1 9 -3 150.852 5.20973 21
 1 9 -3 145.782 4.85645 24
 1 9 -3 132.988 4.78461 19
 1 9 -3 138.201 5.7456 1
 -1 -9 3 139.079 5.6726 1
 -1 -9 3 137.501 5.06278 21
 -1 -9 3 143.035 5.86263 13
 -1 -9 3 142.456 5.82873 23
 -1 -9 3 138.1 4.88915 20
 -1 -9 3 139.371 5.69553 1
 0 9 -3 29.1037 2.34082 23
 0 9 -3 27.124 2.11184 19
 0 9 -3 22.594 2.78001 21
 0 9 -3 23.6569 2.15056 24
 0 9 -3 24.7627 3.20466 13
 0 9 -3 26.9036 3.28751 1
 0 -9 3 23.3769 3.03297 13
 0 -9 3 25.3707 3.15909 1
 0 -9 3 27.809 3.30563 23
 0 -9 3 25.2474 2.30722 20
 0 -9 3 25.9071 2.53796 3
 0 -9 3 28.3738 3.10097 1
 -1 9 -3 4.19256 1.99664 1
 -1 9 -3 11.273 1.66329 7
 -1 9 -3 11.5431 1.24586 19
 -1 9 -3 9.19134 2.30656 1
 -1 9 -3 15.68 1.98566 23
 -1 9 -3 9.7012 1.63819 24
 -1 9 -3 12.3522 2.12272 13
 -1 9 -3 13.6074 2.09716 21
 1 -9 3 11.3716 1.77009 20
 1 -9 3 11.9081 2.05489 3
 1 -9 3 8.73264 2.18643 1
 1 -9 3 6.57721 2.07723 1
 1 -9 3 10.4424 2.14001 13
 1 -9 3 6.68797 2.32542 23
 -2 9 -3 229.518 7.5846 13
 -2 9 -3 222.356 7.33837 21
 -2 9 -3 220.886 7.4837 1
 -2 9 -3 234.219 7.16909 23
 -2 9 -3 226.987 6.01653 12
 -2 9 -3 224.605 6.81546 24
 -2 9 -3 228.177 7.6699 1
 2 -9 3 228.316 7.70975 1
 2 -9 3 236.859 7.54874 13
 2 -9 3 234.321 7.75307 1
 2 -9 3 220.607 7.47679 14
 2 -9 3 218.14 6.86417 20
 2 -9 3 230.356 7.79074 23
 -3 9 -3 13.4967 1.72279 24
 -3 9 -3 8.18342 2.06498 13
 -3 9 -3 8.91405 2.25988 1
 -3 9 -3 10.6719 1.41689 23
 -3 9 -3 6.92472 2.22692 1
 -3 9 -3 9.73501 2.43536 21
 3 -9 3 9.27733 1.17212 19
 3 -9 3 9.72865 1.50812 22
 3 -9 3 5.97662 2.01242 1
 3 -9 3 7.88709 2.15077 13
 3 -9 3 7.31558 2.55018 23
 3 -9 3 10.5146 2.32175 1
 3 -9 3 9.82587 1.90293 20
 3 -9 3 5.74021 2.26292 14
 -4 9 -3 24.3888 2.64068 10
 -4 9 -3 25.0637 3.03848 21
 -4 9 -3 24.1098 2.81241 13
 -4 9 -3 28.3151 3.35531 1
 -4 9 -3 23.5029 2.72892 1
 4 -9 3 30.2029 3.28343 1
 4 -9 3 22.3433 2.02299 22
 4 -9 3 23.7387 2.24178 19
 4 -9 3 25.8636 3.00647 7
 4 -9 3 28.9443 3.49194 13
 4 -9 3 20.3764 2.85633 14
 4 -9 3 22.8939 2.80812 1
 4 -9 3 27.4409 2.30229 20
 4 -9 3 23.6588 3.28118 23
 -5 9 -3 1.97752 2.16491 1
 -5 9 -3 -2.2776 2.66697 21
 -5 9 -3 -0.5241 2.43269 13
 -5 9 -3 -0.941 2.11281 1
 5 -9 3 -0.7708 1.75978 19
 5 -9 3 0.98525 2.18575 7
 5 -9 3 1.05837 2.26205 1
 5 -9 3 2.86157 2.80694 23
 5 -9 3 2.70749 1.93862 20
 5 -9 3 0.88201 2.2168 14
 5 -9 3 -0.4022 1.96664 1
 5 -9 3 0.36669 1.25905 22
 -6 9 -3 5.9899 2.42843 1
 -6 9 -3 3.38314 2.47186 1
 -6 9 -3 4.62807 2.75621 13
 6 -9 3 3.12761 2.3476 14
 6 -9 3 10.2047 2.45403 20
 6 -9 3 3.7182 2.38146 1
 6 -9 3 3.7597 2.99534 23
 6 -9 3 2.60669 2.41022 1
 6 -9 3 3.86366 2.73427 7
 -7 9 -3 12.7075 2.90483 1
 -7 9 -3 14.3204 2.3113 6
 -7 9 -3 10.5588 3.80179 13
 -7 9 -3 12.0693 3.0756 1
 7 -9 3 16.1074 3.00481 1
 7 -9 3 10.1555 2.95851 1
 7 -9 3 13.6928 4.00242 7
 7 -9 3 10.6778 3.34546 20
 7 -9 3 5.23697 2.9525 14
 7 -9 3 9.84672 3.32835 23
 7 8 -3 9.31375 2.87151 1
 7 8 -3 4.86304 3.07389 24
 7 8 -3 10.3927 3.38281 1
 -7 -8 3 10.3428 4.15113 8
 -7 -8 3 1.71306 4.21946 13
 -7 -8 3 11.583 3.18321 1
 -7 -8 3 4.96222 2.72385 14
 -7 -8 3 7.9815 3.21455 20
 -7 -8 3 8.05788 4.12051 21
 6 8 -3 3.86886 2.66014 24
 6 8 -3 -2.3396 2.48788 1
 -6 -8 3 -5.2396 3.06291 13
 -6 -8 3 -1.3121 2.84395 21
 -6 -8 3 0.54706 3.22843 8
 -6 -8 3 -2.4655 2.33562 1
 -6 -8 3 -1.1299 2.06899 14
 -6 -8 3 0.81561 2.03521 20
 5 8 -3 41.022 4.20692 1
 -5 -8 3 40.9832 3.10382 20
 -5 -8 3 39.0454 4.30381 8
 -5 -8 3 36.9266 3.16863 14
 -5 -8 3 38.5318 4.02127 21
 -5 -8 3 33.5762 3.73355 13
 -5 -8 3 34.1173 3.94339 1
 4 8 -3 10.7027 1.8132 24
 4 8 -3 6.81634 2.54893 1
 4 8 -3 8.08841 1.32913 9
 -4 -8 3 9.58163 2.34681 1
 -4 -8 3 8.35853 1.91649 20
 -4 -8 3 6.81829 1.64685 14
 -4 -8 3 5.91688 2.50665 13
 -4 -8 3 9.71496 2.00839 21
 3 8 -3 7.84768 1.90477 3
 3 8 -3 7.23083 2.22419 1
 3 8 -3 4.96155 1.51439 21
 3 8 -3 6.47073 1.60389 24
 -3 -8 3 2.08576 2.0193 1
 -3 -8 3 7.21659 2.36111 13
 -3 -8 3 8.64604 1.72048 20
 -3 -8 3 3.86938 2.35141 23
 -3 -8 3 7.62604 1.74749 21
 2 8 -3 265.3 7.87671 3
 2 8 -3 275.334 7.77136 21
 2 8 -3 267.595 7.72696 24
 2 8 -3 270.231 8.59671 1
 -2 -8 3 282.63 8.82185 13
 -2 -8 3 269.052 8.45238 1
 -2 -8 3 271.327 7.7703 20
 -2 -8 3 282.45 7.8597 21
 -2 -8 3 285.224 8.18811 11
 -2 -8 3 263.969 8.53999 23
 1 8 -3 6.03623 1.60073 21
 1 8 -3 6.63596 1.51468 24
 1 8 -3 6.72196 1.70481 19
 1 8 -3 4.86988 1.99665 1
 -1 -8 3 4.60498 2.07864 23
 -1 -8 3 3.58233 1.80718 1
 -1 -8 3 5.37092 1.68567 21
 -1 -8 3 9.14743 1.97546 1
 -1 -8 3 6.33031 1.74828 11
 -1 -8 3 7.01404 1.43162 20
 -1 -8 3 4.35121 1.61131 13
 0 8 -3 61.6313 2.55845 19
 0 8 -3 60.9512 2.81447 24
 0 8 -3 61.9234 3.68459 1
 0 8 -3 54.75 3.12935 21
 0 8 -3 64.732 3.0503 23
 0 8 -3 55.6763 3.22513 13
 0 -8 3 62.2167 3.21834 3
 0 -8 3 57.031 3.22719 13
 0 -8 3 64.2443 3.65004 1
 0 -8 3 59.7827 2.83834 20
 0 -8 3 62.3724 3.79359 23
 0 -8 3 60.4107 3.56834 1
 -1 8 -3 161.486 4.38174 19
 -1 8 -3 154.117 5.68245 13
 -1 8 -3 153.147 4.9956 7
 -1 8 -3 157.709 5.77075 1
 -1 8 -3 155.797 4.96159 24
 -1 8 -3 154.295 5.80443 1
 -1 8 -3 156.541 5.26953 23
 -1 8 -3 154.449 5.34005 21
 1 -8 3 156.462 5.55649 1
 1 -8 3 160.842 5.59461 3
 1 -8 3 156.098 4.91969 20
 1 -8 3 151.776 5.66345 13
 1 -8 3 153.208 5.77266 23
 1 -8 3 160.076 5.80757 1
 -2 8 -3 11.7043 2.09798 1
 -2 8 -3 12.4844 1.78611 21
 -2 8 -3 10.6651 1.70219 24
 -2 8 -3 10.6304 1.96451 13
 -2 8 -3 14.5428 1.57396 23
 -2 8 -3 8.63841 2.01109 1
 2 -8 3 11.0375 1.94964 13
 2 -8 3 10.267 1.59378 20
 2 -8 3 12.1203 2.07824 14
 2 -8 3 10.7432 2.06696 1
 2 -8 3 11.3987 1.95052 23
 2 -8 3 10.9945 2.02894 1
 2 -8 3 11.5629 1.38884 22
 2 -8 3 11.7195 1.12097 19
 -3 8 -3 1.86497 1.71209 13
 -3 8 -3 -1.4412 1.25326 23
 -3 8 -3 0.02118 1.71653 1
 -3 8 -3 1.68785 1.89468 1
 -3 8 -3 2.9727 1.88907 21
 3 -8 3 1.20491 1.46161 7
 3 -8 3 1.03857 2.09037 23
 3 -8 3 2.21326 1.11593 19
 3 -8 3 3.75435 1.43083 20
 3 -8 3 2.58602 1.97446 1
 3 -8 3 3.88062 1.84572 14
 3 -8 3 2.08997 1.75402 1
 3 -8 3 -0.0105 1.68172 13
 3 -8 3 2.1327 1.14535 22
 -4 8 -3 56.5494 4.01691 1
 -4 8 -3 51.9237 3.67773 13
 -4 8 -3 54.275 3.86632 1
 -4 8 -3 49.4474 2.88014 10
 -4 8 -3 58.852 3.10016 23
 4 -8 3 57.3956 3.87398 1
 4 -8 3 50.6483 2.75455 19
 4 -8 3 53.8004 3.7123 13
 4 -8 3 52.2654 3.53086 7
 4 -8 3 52.9652 4.15632 23
 4 -8 3 55.9727 3.15238 20
 4 -8 3 51.7409 3.94742 14
 4 -8 3 50.6219 3.91672 1
 4 -8 3 51.8773 2.35357 22
 -5 8 -3 70.0615 4.60612 13
 -5 8 -3 59.1743 3.77312 1
 -5 8 -3 63.9605 4.32697 1
 5 -8 3 59.9614 2.24875 4
 5 -8 3 58.3734 3.15971 20
 5 -8 3 61.7896 4.59595 23
 5 -8 3 68.1794 4.45118 1
 5 -8 3 63.576 4.35135 7
 5 -8 3 63.3126 3.91636 1
 5 -8 3 66.2331 4.56823 14
 -6 8 -3 20.8412 2.89925 1
 -6 8 -3 24.3972 2.59546 6
 -6 8 -3 26.3164 3.21527 13
 -6 8 -3 22.1831 3.22088 1
 6 -8 3 21.6902 2.63283 20
 6 -8 3 25.2402 3.20367 14
 6 -8 3 27.1063 3.65348 1
 6 -8 3 21.2901 3.07692 1
 6 -8 3 17.1926 3.40243 23
 -7 8 -3 11.8243 2.40482 1
 -7 8 -3 7.13851 3.35939 13
 -7 8 -3 7.39841 2.23657 5
 -7 8 -3 5.878 2.2394 6
 -7 8 -3 5.63848 2.76168 1
 7 -8 3 7.89949 3.34254 23
 7 -8 3 0.17766 2.62869 14
 7 -8 3 3.78845 2.12401 1
 7 -8 3 4.9385 2.47456 1
 -8 8 -3 -3.4703 2.80686 1
 -8 8 -3 2.9586 2.1404 5
 -8 8 -3 3.95893 2.48667 1
 -8 8 -3 2.37574 4.22034 13
 -8 8 -3 3.37508 2.99742 6
 8 -8 3 2.41662 3.36693 23
 8 -8 3 2.89068 3.3757 14
 8 -8 3 -0.701 2.72318 1
 8 -8 3 2.14582 2.52154 1
 7 7 -3 2.78402 2.88514 24
 7 7 -3 0.22151 2.48627 1
 7 7 -3 -3.212 3.06632 1
 -7 -7 3 -1.4625 2.83039 20
 -7 -7 3 -3.7489 3.7709 13
 -7 -7 3 -2.59 2.71496 1
 -7 -7 3 -0.5809 2.39041 14
 -7 -7 3 -1.3795 3.59057 21
 -7 -7 3 2.00128 3.3179 8
 6 7 -3 1.80571 2.33233 1
 6 7 -3 4.33097 2.66115 24
 -6 -7 3 -2.6292 1.38249 20
 -6 -7 3 1.59224 2.24782 1
 -6 -7 3 -0.3087 1.80805 14
 -6 -7 3 -0.587 2.92153 13
 -6 -7 3 2.11826 2.59657 21
 -6 -7 3 1.77095 2.84078 8
 5 7 -3 4.6146 1.76281 24
 5 7 -3 5.01122 2.47617 1
 -5 -7 3 0.67727 2.41328 13
 -5 -7 3 8.81309 2.03361 20
 -5 -7 3 4.82062 2.28857 1
 -5 -7 3 5.35004 2.66518 8
 -5 -7 3 5.24563 1.64588 14
 -5 -7 3 4.23237 2.03095 21
 4 7 -3 0.34019 1.98573 1
 4 7 -3 0.58963 0.88471 15
 4 7 -3 1.09501 0.81609 9
 4 7 -3 5.35748 1.64215 24
 -4 -7 3 1.64494 1.29027 14
 -4 -7 3 -0.3544 2.05309 13
 -4 -7 3 0.95815 1.50588 20
 -4 -7 3 3.44947 2.05786 1
 -4 -7 3 1.61204 1.53022 21
 -4 -7 3 -1.5978 1.97971 8
 3 7 -3 127.09 5.17182 1
 3 7 -3 119.141 4.25017 24
 3 7 -3 127.724 4.20445 21
 -3 -7 3 124.954 4.36222 20
 -3 -7 3 120.433 4.2717 21
 -3 -7 3 126.944 5.14518 1
 -3 -7 3 119.068 5.26986 13
 2 7 -3 179.434 5.4323 21
 2 7 -3 181.095 6.24758 1
 2 7 -3 179.169 5.69602 3
 2 7 -3 180.104 5.44064 24
 -2 -7 3 185.077 6.27112 1
 -2 -7 3 173.604 5.40419 21
 -2 -7 3 181.479 5.53785 20
 -2 -7 3 170.221 6.13433 23
 -2 -7 3 185.694 6.39176 13
 -2 -7 3 185.943 5.8698 11
 1 7 -3 30.6589 2.3378 3
 1 7 -3 30.4434 2.43481 1
 1 7 -3 26.7417 2.06929 24
 1 7 -3 30.9188 2.39232 21
 1 7 -3 28.3741 2.08283 19
 -1 -7 3 32.0625 2.90009 13
 -1 -7 3 28.4657 2.81072 1
 -1 -7 3 34.5127 2.77606 11
 -1 -7 3 32.2847 2.11469 20
 -1 -7 3 30.145 2.73056 1
 -1 -7 3 29.1841 2.95675 23
 -1 -7 3 28.004 2.42095 21
 0 7 -3 87.8025 3.33777 24
 0 7 -3 99.1782 3.62368 23
 0 7 -3 90.9401 3.82339 13
 0 7 -3 91.2261 3.72013 21
 0 7 -3 99.7087 4.21664 1
 0 7 -3 94.8337 3.07628 19
 0 -7 3 91.212 4.09931 1
 0 -7 3 90.1788 3.41204 20
 0 -7 3 89.9316 4.16791 13
 0 -7 3 90.6255 3.7531 3
 0 -7 3 86.3131 4.02436 1
 -1 7 -3 118.921 4.1649 7
 -1 7 -3 124.908 3.5799 19
 -1 7 -3 118.945 3.96993 24
 -1 7 -3 120.833 4.49358 1
 -1 7 -3 118.54 4.33818 21
 -1 7 -3 118.938 3.09034 12
 -1 7 -3 116.43 4.66772 1
 -1 7 -3 121.179 4.309 23
 -1 7 -3 120.391 4.63038 13
 1 -7 3 109.43 4.66296 23
 1 -7 3 122.435 4.55418 3
 1 -7 3 122.962 4.51317 1
 1 -7 3 121.117 4.67851 1
 1 -7 3 121.618 3.92945 20
 1 -7 3 121.986 4.65649 13
 -2 7 -3 95.5078 3.65035 23
 -2 7 -3 92.3525 4.13562 1
 -2 7 -3 91.7865 3.4086 24
 -2 7 -3 92.5056 3.97026 21
 -2 7 -3 90.8365 4.07622 13
 -2 7 -3 96.9205 4.17859 1
 2 -7 3 98.8286 3.11972 22
 2 -7 3 89.0899 3.85512 1
 2 -7 3 89.2531 4.04834 13
 2 -7 3 92.6704 2.88958 19
 2 -7 3 88.0446 4.01573 14
 2 -7 3 90.9603 4.13205 1
 2 -7 3 90.3279 4.22678 23
 2 -7 3 95.7879 3.49172 20
 -3 7 -3 47.0051 3.21099 1
 -3 7 -3 46.2377 2.58215 23
 -3 7 -3 43.6206 2.84321 1
 -3 7 -3 43.2659 3.129 13
 -3 7 -3 41.4344 2.49511 10
 3 -7 3 46.2253 2.21003 19
 3 -7 3 47.6485 2.81579 7
 3 -7 3 44.729 3.32499 14
 3 -7 3 47.686 2.03656 22
 3 -7 3 47.5297 2.33161 20
 3 -7 3 43.0493 1.86032 16
 3 -7 3 40.3516 3.39318 23
 3 -7 3 46.6883 3.14648 13
 3 -7 3 42.366 2.83996 1
 3 -7 3 45.0117 3.23821 1
 -4 7 -3 2.95611 1.92156 1
 -4 7 -3 1.41813 1.90806 1
 -4 7 -3 6.137 1.88296 13
 -4 7 -3 5.38217 1.45201 10
 -4 7 -3 2.78526 1.4477 23
 -4 7 -3 5.31448 0.82379 6
 4 -7 3 5.30352 1.84199 7
 4 -7 3 5.75343 1.96878 1
 4 -7 3 3.15985 1.96121 14
 4 -7 3 6.16491 1.64086 20
 4 -7 3 5.87701 1.16186 22
 4 -7 3 3.25557 2.29063 23
 4 -7 3 5.79602 2.11244 1
 -5 7 -3 54.8831 3.89718 13
 -5 7 -3 56.4917 2.65458 6
 -5 7 -3 45.8926 4.04087 1
 -5 7 -3 58.5698 4.07015 1
 5 -7 3 58.2569 4.15552 1
 5 -7 3 44.5572 3.44523 14
 5 -7 3 67.2165 4.17441 1
 5 -7 3 54.588 4.30596 23
 -6 7 -3 12.939 2.25668 1
 -6 7 -3 8.93154 2.54823 13
 -6 7 -3 10.3863 2.59371 1
 -6 7 -3 8.98295 1.85948 6
 6 -7 3 11.6462 3.07766 23
 6 -7 3 7.07092 2.54766 14
 6 -7 3 8.93002 2.12597 1
 6 -7 3 13.7092 2.60959 1
 -7 7 -3 1.21525 3.02339 13
 -7 7 -3 -5.0227 2.43091 1
 -7 7 -3 -1.0853 2.21071 1
 -7 7 -3 1.2549 2.30306 6
 -7 7 -3 0.57276 1.93658 5
 7 -7 3 -0.2597 2.27047 1
 7 -7 3 0.72917 2.48731 14
 7 -7 3 -1.8732 2.5174 1
 7 -7 3 0.71703 3.01833 23
 -8 7 -3 0.13708 3.01568 1
 -8 7 -3 0.69724 3.09718 6
 -8 7 -3 -1.4942 3.78668 13
 8 -7 3 -3.5229 2.57061 1
 8 -7 3 -2.3923 3.24334 23
 8 -7 3 3.74035 3.06457 1
 8 -7 3 -0.2454 3.40763 14
 8 6 -3 -1.5027 3.3834 11
 8 6 -3 7.47177 3.11553 24
 8 6 -3 6.22555 3.72646 1
 8 6 -3 -6.5183 2.90365 1
 -8 -6 3 3.53544 4.71127 4
 -8 -6 3 -1.5767 4.67684 13
 -8 -6 3 -3.3127 3.14264 1
 -8 -6 3 1.72209 3.1378 20
 -8 -6 3 0.3676 3.08452 14
 7 6 -3 1.24218 2.76151 11
 7 6 -3 2.17762 3.05155 1
 7 6 -3 3.42822 2.74397 24
 7 6 -3 -3.2925 2.35538 1
 -7 -6 3 -1.5016 2.26165 14
 -7 -6 3 -0.9284 3.32111 13
 -7 -6 3 0.62182 3.23591 21
 -7 -6 3 -2.4994 2.63455 1
 6 6 -3 27.095 3.557 1
 6 6 -3 26.3432 3.33935 1
 6 6 -3 18.3275 2.62452 11
 -6 -6 3 18.3474 2.43296 20
 -6 -6 3 18.9589 3.24451 13
 -6 -6 3 20.8687 3.19983 1
 -6 -6 3 22.5802 3.22251 8
 -6 -6 3 18.1055 2.60692 21
 -6 -6 3 22.382 2.91805 14
 5 6 -3 -1.1758 1.55837 24
 5 6 -3 -2.7323 2.07478 1
 5 6 -3 0.46279 1.83033 11
 -5 -6 3 -0.3762 2.13104 1
 -5 -6 3 -1.8461 2.19327 13
 -5 -6 3 -0.5332 1.69062 21
 -5 -6 3 1.7571 1.64383 20
 -5 -6 3 0.579 1.33302 14
 -5 -6 3 -1.7387 2.06609 8
 4 6 -3 16.2194 2.46601 1
 4 6 -3 14.4796 1.98296 11
 4 6 -3 14.6109 1.86068 24
 -4 -6 3 12.8255 2.29968 1
 -4 -6 3 15.2444 2.38437 8
 -4 -6 3 14.4569 1.90502 14
 -4 -6 3 12.2353 1.60809 21
 -4 -6 3 13.728 1.82873 20
 -4 -6 3 13.5677 2.39488 13
 -4 -6 3 15.719 1.97525 23
 3 6 -3 286.383 8.72485 1
 3 6 -3 287.828 7.91423 24
 -3 -6 3 292.287 7.60607 14
 -3 -6 3 290.208 7.72643 21
 -3 -6 3 289.215 8.78412 13
 -3 -6 3 286.835 8.00949 20
 -3 -6 3 292.057 8.73613 1
 2 6 -3 11.287 1.45507 24
 2 6 -3 10.1305 1.56535 3
 2 6 -3 8.17392 1.21244 21
 2 6 -3 10.8433 1.88582 1
 -2 -6 3 11.2361 0.9984 18
 -2 -6 3 7.32125 1.81951 1
 -2 -6 3 11.2085 1.28725 21
 -2 -6 3 8.28089 1.89597 13
 -2 -6 3 10.2601 1.39496 20
 -2 -6 3 10.3449 1.55951 11
 -2 -6 3 9.30918 1.95474 23
 1 6 -3 198.562 6.42273 13
 1 6 -3 187.522 5.90346 3
 1 6 -3 205.415 5.63705 24
 1 6 -3 200.342 6.33223 1
 1 6 -3 193.403 5.58843 19
 1 6 -3 192.865 5.60571 21
 -1 -6 3 205.311 5.70766 20
 -1 -6 3 196.805 5.59488 21
 -1 -6 3 206.001 6.17913 11
 -1 -6 3 189.899 6.15815 13
 -1 -6 3 200.6 6.21642 23
 -1 -6 3 194.967 6.27218 1
 -1 -6 3 194.721 6.27961 1
 0 6 -3 232.28 7.27343 13
 0 6 -3 248.187 6.45547 19
 0 6 -3 254.068 7.09418 23
 0 6 -3 245.476 6.67941 24
 0 6 -3 240.566 7.32639 1
 0 -6 3 237.977 7.29407 1
 0 -6 3 243.777 7.30289 1
 0 -6 3 251.495 6.75226 20
 0 -6 3 242.145 7.35655 13
 0 -6 3 245.298 7.15671 3
 0 -6 3 249.97 7.25631 23
 -1 6 -3 15.7863 1.90986 7
 -1 6 -3 13.6488 1.79839 13
 -1 6 -3 12.4922 1.85963 1
 -1 6 -3 12.7097 1.39373 19
 -1 6 -3 14.0672 1.78942 23
 -1 6 -3 16.3807 1.59029 24
 -1 6 -3 14.408 1.66062 21
 -1 6 -3 10.8597 1.77822 1
 1 -6 3 9.5373 1.78729 13
 1 -6 3 11.7892 1.82114 23
 1 -6 3 10.8993 1.66762 14
 1 -6 3 14.4863 1.82975 1
 1 -6 3 14.027 1.48878 20
 1 -6 3 12.6408 1.84362 1
 1 -6 3 14.3147 1.28485 19
 -2 6 -3 331.197 9.37537 1
 -2 6 -3 332.162 9.28563 13
 -2 6 -3 332.2 9.3643 1
 -2 6 -3 323.446 8.71299 24
 -2 6 -3 331.239 9.0844 23
 2 -6 3 330.355 9.36866 1
 2 -6 3 324.686 8.36197 22
 2 -6 3 339.175 8.42003 19
 2 -6 3 339.19 9.40008 1
 2 -6 3 332.725 8.94397 7
 2 -6 3 328.769 8.75908 20
 2 -6 3 327.003 9.26173 13
 2 -6 3 322.222 9.15254 14
 -3 6 -3 202.717 6.64369 1
 -3 6 -3 208.891 6.31546 23
 -3 6 -3 199.481 5.96028 10
 -3 6 -3 207.17 6.71504 1
 -3 6 -3 204.027 6.53079 13
 3 -6 3 199.645 6.68554 23
 3 -6 3 208.363 6.70707 1
 3 -6 3 200.524 5.72031 19
 3 -6 3 203.501 6.6629 14
 3 -6 3 197.32 5.9174 20
 3 -6 3 215.197 6.81989 1
 3 -6 3 209.927 6.30171 7
 3 -6 3 203.713 5.43494 22
 3 -6 3 206.512 6.48304 13
 -4 6 -3 184.555 6.531 1
 -4 6 -3 179.132 6.1171 13
 -4 6 -3 186.53 6.50049 1
 -4 6 -3 177.545 5.86857 23
 -4 6 -3 171.603 4.48241 17
 4 -6 3 183.192 6.49453 1
 4 -6 3 176.949 6.473 23
 4 -6 3 183.874 4.89202 22
 4 -6 3 184.669 6.52956 1
 4 -6 3 177.359 6.16184 14
 -5 6 -3 46.4091 3.76227 13
 -5 6 -3 43.3204 3.65524 1
 -5 6 -3 42.4232 3.76872 1
 5 -6 3 36.2414 3.82542 23
 5 -6 3 43.9295 3.76798 1
 5 -6 3 44.5144 3.72715 1
 5 -6 3 44.3747 3.76857 14
 -6 6 -3 6.39311 2.47954 13
 -6 6 -3 3.70319 2.12888 1
 -6 6 -3 7.86363 2.32239 1
 -6 6 -3 3.31217 1.65865 5
 6 -6 3 4.29963 2.28403 1
 6 -6 3 0.58229 2.17192 14
 6 -6 3 5.48214 2.76189 23
 6 -6 3 1.09641 2.18316 1
 -7 6 -3 15.3185 3.25577 13
 -7 6 -3 9.95609 2.46452 1
 -7 6 -3 15.2262 2.94152 1
 -7 6 -3 9.94465 1.89132 5
 7 -6 3 9.2717 2.71725 1
 7 -6 3 14.8549 2.65673 1
 7 -6 3 11.8612 3.41465 23
 7 -6 3 7.95281 2.88945 14
 -8 6 -3 13.5621 3.9119 13
 -8 6 -3 11.6315 3.03844 1
 -8 6 -3 2.33337 2.7481 1
 8 -6 3 3.19842 2.79682 1
 8 -6 3 12.8329 3.34512 14
 8 -6 3 13.1956 2.87166 1
 8 -6 3 10.1221 3.54407 23
 8 5 -3 12.0527 2.47465 5
 8 5 -3 14.708 3.92998 11
 8 5 -3 9.77031 3.10973 1
 8 5 -3 15.7808 3.26819 24
 -8 -5 3 13.9406 4.36893 4
 -8 -5 3 9.02126 4.51071 13
 -8 -5 3 8.47186 3.55553 1
 -8 -5 3 14.6449 4.47043 21
 -8 -5 3 11.4267 3.291 20
 7 5 -3 8.1046 2.68781 24
 7 5 -3 10.722 2.97786 11
 7 5 -3 11.1634 2.86973 1
 -7 -5 3 7.94781 2.96285 1
 -7 -5 3 5.85075 2.23859 20
 -7 -5 3 6.24867 2.22711 14
 -7 -5 3 9.89563 3.01058 21
 6 5 -3 8.14194 2.58344 1
 6 5 -3 0.64624 2.22218 11
 6 5 -3 0.70022 2.01423 1
 6 5 -3 0.39196 1.68046 24
 -6 -5 3 0.60527 2.04484 21
 -6 -5 3 0.50923 1.74819 20
 -6 -5 3 0.56949 1.61378 14
 -6 -5 3 2.51582 2.26935 8
 -6 -5 3 -1.4099 2.16804 1
 5 5 -3 42.5655 2.69466 24
 5 5 -3 43.2459 3.79892 1
 5 5 -3 37.9599 3.32285 11
 -5 -5 3 37.8682 3.71326 1
 -5 -5 3 39.9619 2.51807 14
 -5 -5 3 42.1203 3.77848 13
 -5 -5 3 42.3201 3.03662 21
 -5 -5 3 39.4077 3.67654 8
 -5 -5 3 39.9302 3.09549 23
 -5 -5 3 44.0391 2.87215 20
 4 5 -3 29.5757 3.04741 1
 4 5 -3 30.5121 2.18124 24
 4 5 -3 31.1016 2.63343 11
 -4 -5 3 31.3818 3.24257 8
 -4 -5 3 26.1767 3.02905 1
 -4 -5 3 30.4765 2.25697 21
 -4 -5 3 31.4328 3.08673 13
 -4 -5 3 34.901 2.57273 23
 -4 -5 3 32.5825 2.30264 20
 -4 -5 3 30.4627 1.95705 14
 3 5 -3 -0.9828 1.37862 11
 3 5 -3 -0.2435 1.11215 24
 3 5 -3 -1.3049 1.50404 1
 -3 -5 3 -1.6214 1.55371 13
 -3 -5 3 -0.6522 1.01298 20
 -3 -5 3 0.72713 0.7746 14
 -3 -5 3 -3.7858 1.40957 1
 -3 -5 3 0.19274 0.88003 21
 -3 -5 3 -0.7959 1.49764 8
 2 5 -3 747.263 18.7851 1
 2 5 -3 735.551 17.965 21
 2 5 -3 744.458 18.2124 24
 -2 -5 3 759.291 18.8006 1
 -2 -5 3 746.025 18.5628 11
 -2 -5 3 740.339 18.0056 21
 -2 -5 3 719.811 18.8584 13
 -2 -5 3 746.162 18.2726 20
 -2 -5 3 749.812 17.6795 18
 1 5 -3 108.173 3.93785 3
 1 5 -3 110.395 3.47971 24
 1 5 -3 110.966 3.48023 21
 1 5 -3 110.362 3.98349 13
 1 5 -3 107.928 3.52579 19
 1 5 -3 111.27 4.08028 1
 -1 -5 3 107.055 4.01582 1
 -1 -5 3 110.261 3.96778 11
 -1 -5 3 117.575 3.52632 20
 -1 -5 3 114.589 4.0823 1
 -1 -5 3 110.689 3.4388 21
 -1 -5 3 105.326 3.95003 23
 -1 -5 3 108.669 4.2209 13
 0 5 -3 73.4133 3.28346 1
 0 5 -3 74.2159 2.97445 23
 0 5 -3 74.7855 2.64994 24
 0 5 -3 75.9427 3.05647 13
 0 5 -3 75.1149 2.75863 21
 0 5 -3 80.6888 2.56059 19
 0 5 -3 72.6169 3.26299 1
 0 -5 3 72.8831 3.26162 1
 0 -5 3 71.8287 3.12133 23
 0 -5 3 76.7371 2.72433 20
 0 -5 3 73.6866 3.3496 13
 0 -5 3 72.984 3.29097 3
 0 -5 3 68.8336 3.20616 1
 -1 5 -3 496.673 12.1632 19
 -1 5 -3 490.628 12.7789 1
 -1 5 -3 502.77 12.3207 24
 -1 5 -3 495.334 12.8292 1
 -1 5 -3 485.937 12.6139 7
 -1 5 -3 479.965 12.8055 13
 -1 5 -3 495.025 12.6367 23
 1 -5 3 488.862 12.7763 1
 1 -5 3 484.156 12.6415 14
 1 -5 3 512.658 12.7823 23
 1 -5 3 504.915 12.1741 22
 1 -5 3 483.258 12.7934 1
 1 -5 3 504.845 12.1312 19
 1 -5 3 486.245 12.8265 13
 1 -5 3 494.9 12.3361 20
 -2 5 -3 3.41925 1.11624 23
 -2 5 -3 2.92767 1.43146 1
 -2 5 -3 1.20847 1.41586 13
 -2 5 -3 1.31226 1.44537 1
 -2 5 -3 3.4675 1.05007 24
 2 -5 3 2.621 1.49308 23
 2 -5 3 1.1099 0.79209 22
 2 -5 3 1.468 0.99402 19
 2 -5 3 1.75121 1.44024 13
 2 -5 3 1.848 1.3098 7
 2 -5 3 3.55911 1.48233 1
 2 -5 3 3.66668 1.11534 20
 2 -5 3 1.22641 1.44623 1
 2 -5 3 1.36459 1.4049 14
 -3 5 -3 34.4583 2.24125 10
 -3 5 -3 33.8276 2.74921 13
 -3 5 -3 34.6033 2.87666 1
 -3 5 -3 34.2007 2.23452 23
 -3 5 -3 37.1469 2.88214 1
 3 -5 3 39.6656 2.98263 14
 3 -5 3 39.0303 2.98738 23
 3 -5 3 37.841 1.74237 22
 3 -5 3 32.1311 2.88473 1
 3 -5 3 39.4127 2.88392 1
 -4 5 -3 463.533 12.9879 1
 -4 5 -3 473.211 13.0759 1
 -4 5 -3 470.286 12.7285 13
 -4 5 -3 470.108 12.6867 23
 4 -5 3 476.1 11.5866 22
 4 -5 3 457.237 12.9571 23
 4 -5 3 474.294 12.9843 14
 4 -5 3 475.782 13.0435 1
 4 -5 3 477.09 13.1287 1
 -5 5 -3 27.4506 3.28977 1
 -5 5 -3 21.8395 2.37641 23
 -5 5 -3 27.126 3.26429 1
 -5 5 -3 27.4928 3.10477 13
 5 -5 3 26.7221 3.15872 1
 5 -5 3 28.5758 3.4652 23
 5 -5 3 26.0795 3.32808 14
 5 -5 3 25.4609 3.22269 1
 -6 5 -3 37.4337 3.76874 1
 -6 5 -3 28.8657 2.87524 5
 -6 5 -3 42.4478 3.85908 1
 -6 5 -3 35.7821 3.7573 13
 6 -5 3 35.6224 3.78695 14
 6 -5 3 37.9408 3.66019 1
 6 -5 3 33.4928 4.19283 23
 6 -5 3 36.8949 3.80343 1
 -7 5 -3 33.4928 3.98145 1
 -7 5 -3 31.5643 3.96267 1
 -7 5 -3 22.3721 3.27093 13
 7 -5 3 25.2571 3.71694 23
 7 -5 3 33.8417 3.95056 1
 7 -5 3 29.4499 3.8944 1
 7 -5 3 29.7675 3.64255 14
 -8 5 -3 1.27395 2.65999 1
 -8 5 -3 4.85645 2.87236 1
 -8 5 -3 3.59379 3.74731 13
 8 -5 3 1.41852 1.75735 8
 8 -5 3 3.09821 2.93885 23
 8 -5 3 2.77287 2.72866 1
 8 -5 3 0.97754 2.86204 1
 8 -5 3 -2.2743 3.24739 14
 8 4 -3 22.409 3.60739 1
 8 4 -3 26.4629 4.10003 11
 8 4 -3 20.1812 3.40358 24
 8 4 -3 18.5045 3.35071 1
 8 4 -3 21.7792 2.79833 5
 -8 -4 3 19.9476 3.26844 20
 -8 -4 3 27.1312 4.65129 4
 -8 -4 3 13.5774 3.15116 1
 -8 -4 3 21.7686 4.27141 21
 7 4 -3 0.69829 2.61864 24
 7 4 -3 4.53787 2.46567 1
 7 4 -3 -2.7195 2.68403 11
 7 4 -3 -2.6645 2.23012 1
 -7 -4 3 1.10973 2.07241 20
 -7 -4 3 2.52661 2.05666 14
 -7 -4 3 0.36725 2.44496 1
 -7 -4 3 0.86449 3.00256 4
 -7 -4 3 0.92198 2.72734 21
 6 4 -3 89.1995 3.89901 24
 6 4 -3 83.5032 4.64863 11
 6 4 -3 94.7722 5.00071 1
 6 4 -3 77.8771 4.6656 1
 -6 -4 3 89.203 4.13246 20
 -6 -4 3 82.2409 4.85429 1
 -6 -4 3 90.6817 3.89379 14
 -6 -4 3 93.4012 4.43071 21
 5 4 -3 0.16834 1.34778 24
 5 4 -3 1.23608 1.9541 1
 5 4 -3 4.8684 2.21325 1
 5 4 -3 1.61885 1.81345 11
 -5 -4 3 1.16485 1.82769 8
 -5 -4 3 0.33496 1.15199 14
 -5 -4 3 1.821 2.03221 1
 -5 -4 3 0.54102 1.38448 21
 -5 -4 3 -1.1446 1.60592 23
 -5 -4 3 1.03178 1.55264 20
 4 4 -3 10.6316 1.56645 24
 4 4 -3 12.1971 1.77693 11
 4 4 -3 12.3976 0.89712 18
 4 4 -3 12.8551 2.09623 1
 -4 -4 3 12.2558 1.92725 13
 -4 -4 3 13.0768 1.31308 21
 -4 -4 3 12.5123 1.52286 14
 -4 -4 3 12.8382 2.05256 8
 -4 -4 3 14.3434 1.76726 23
 -4 -4 3 11.9805 2.04961 1
 -4 -4 3 10.3982 1.58457 20
 3 4 -3 184.918 5.17955 24
 3 4 -3 178.284 5.83457 1
 3 4 -3 182.31 5.60947 11
 -3 -4 3 178.159 4.59731 2
 -3 -4 3 182.536 5.24645 20
 -3 -4 3 177.745 5.79504 13
 -3 -4 3 179.295 5.61135 23
 -3 -4 3 179.133 4.73193 14
 -3 -4 3 188.577 5.95473 8
 -3 -4 3 185.194 5.84942 1
 -3 -4 3 174.89 4.84471 21
 2 4 -3 150.767 3.98721 21
 2 4 -3 150.271 4.73364 11
 2 4 -3 146.662 4.27498 24
 2 4 -3 148.441 4.84107 1
 -2 -4 3 151.045 4.89799 1
 -2 -4 3 151.309 4.31935 20
 -2 -4 3 153.575 4.72577 11
 -2 -4 3 145.088 4.0284 21
 -2 -4 3 147.762 4.95943 13
 -2 -4 3 152.059 3.86083 18
 1 4 -3 178.022 4.79406 24
 1 4 -3 171.37 4.67612 21
 1 4 -3 171.313 5.33749 3
 1 4 -3 172.525 5.23465 13
 1 4 -3 179.04 4.9328 19
 1 4 -3 171.492 5.25425 1
 -1 -4 3 180.696 5.24999 1
 -1 -4 3 184.593 4.86701 20
 -1 -4 3 170.544 4.67693 24
 -1 -4 3 178.208 5.18693 23
 -1 -4 3 177.584 5.27304 11
 -1 -4 3 173.917 5.38771 13
 0 4 -3 426.579 10.2226 12
 0 4 -3 429.885 10.6012 24
 0 4 -3 433.757 11.0406 1
 0 4 -3 405.011 10.5777 21
 0 4 -3 412.126 11.0618 13
 0 4 -3 417.984 11.0013 1
 0 4 -3 447.632 10.6497 19
 0 4 -3 445.823 10.9501 23
 0 -4 3 419.329 11.164 3
 0 -4 3 433.16 10.7367 14
 0 -4 3 415.984 10.9891 1
 0 -4 3 431.366 11.0515 1
 0 -4 3 436.488 10.5863 24
 0 -4 3 425.047 11.0834 13
 0 -4 3 450.066 10.6927 20
 0 -4 3 419.357 10.5922 19
 0 -4 3 422.341 10.9226 23
 -1 4 -3 1.13009 1.11261 1
 -1 4 -3 1.6368 0.92281 24
 -1 4 -3 0.91535 0.997 13
 -1 4 -3 0.18793 1.16896 7
 -1 4 -3 -0.3725 0.93814 23
 -1 4 -3 0.70994 1.15732 1
 1 -4 3 0.93903 1.21137 13
 1 -4 3 1.18278 0.80327 19
 1 -4 3 1.64577 0.89699 20
 1 -4 3 -0.3235 1.06219 7
 1 -4 3 0.10777 0.71612 22
 1 -4 3 0.80231 1.12888 23
 1 -4 3 -0.0179 1.12933 1
 1 -4 3 1.05066 1.18248 1
 1 -4 3 0.07748 1.12965 14
 1 -4 3 3.05921 0.63411 24
 -2 4 -3 433.862 11.3133 10
 -2 4 -3 439.542 11.6444 1
 -2 4 -3 436.402 11.6083 1
 -2 4 -3 466.142 11.5317 23
 -2 4 -3 439.179 11.6386 13
 -2 4 -3 445.381 11.6462 14
 2 -4 3 461.821 10.9232 22
 2 -4 3 439.705 11.6478 14
 2 -4 3 453.118 11.5883 23
 2 -4 3 439.348 11.6312 13
 2 -4 3 443.107 11.5856 7
 2 -4 3 442.764 11.6427 1
 2 -4 3 443.316 11.6603 1
 2 -4 3 440.974 11.1458 19
 -3 4 -3 641.138 16.236 14
 -3 4 -3 625.169 16.0724 13
 -3 4 -3 623.793 14.8715 17
 -3 4 -3 642.217 16.0353 23
 -3 4 -3 626.643 16.2357 1
 -3 4 -3 616.141 16.1907 1
 -3 4 -3 612.165 15.6718 10
 3 -4 3 633.922 16.2795 1
 3 -4 3 629.234 16.2073 1
 3 -4 3 635.624 15.2035 22
 3 -4 3 615.565 16.1676 14
 -4 4 -3 1.8353 1.75369 1
 -4 4 -3 4.64843 1.807 14
 -4 4 -3 4.01759 1.55916 1
 -4 4 -3 2.38106 1.66412 13
 -4 4 -3 3.7929 1.26307 23
 4 -4 3 2.02084 1.43597 1
 4 -4 3 6.40035 1.87051 14
 4 -4 3 1.07111 1.32834 10
 4 -4 3 0.59335 1.72839 1
 4 -4 3 0.96873 1.55576 23
 -5 4 -3 52.2783 3.75889 14
 -5 4 -3 40.0733 2.73428 5
 -5 4 -3 48.285 3.60953 1
 -5 4 -3 51.3961 2.8227 23
 -5 4 -3 43.1301 3.37382 13
 -5 4 -3 45.4782 3.68064 1
 5 -4 3 44.1105 2.91721 10
 5 -4 3 44.5403 3.57942 1
 5 -4 3 41.8365 3.02936 14
 5 -4 3 48.1336 3.6893 1
 5 -4 3 39.0972 3.70852 23
 -6 4 -3 32.7365 1.22823 16
 -6 4 -3 33.9865 3.68614 1
 -6 4 -3 38.8372 3.94917 1
 -6 4 -3 33.1146 3.64529 13
 -6 4 -3 32.4 2.65029 5
 -6 4 -3 42.5637 3.88027 14
 6 -4 3 36.8319 4.12735 23
 6 -4 3 48.7741 4.0117 1
 6 -4 3 39.8338 3.23107 10
 6 -4 3 29.0901 3.72228 14
 6 -4 3 34.1988 3.64952 1
 -7 4 -3 0.50267 0.91827 16
 -7 4 -3 -1.1879 2.23199 1
 -7 4 -3 -0.4787 2.64524 13
 -7 4 -3 1.99157 2.22308 1
 7 -4 3 -0.1435 1.30196 8
 7 -4 3 3.8532 2.81613 23
 7 -4 3 1.27105 2.34285 10
 7 -4 3 2.20594 2.39939 1
 7 -4 3 -2.7072 2.05311 1
 7 -4 3 -1.2681 2.42393 14
 -8 4 -3 16.7086 3.25929 1
 -8 4 -3 20.0631 3.35149 1
 -8 4 -3 12.4486 3.76032 13
 8 -4 3 12.9216 3.12692 1
 8 -4 3 12.0178 3.28513 10
 8 -4 3 18.5552 3.75868 23
 8 -4 3 6.91441 2.79371 1
 8 -4 3 10.8618 3.75789 14
 8 3 -3 5.09414 2.82611 24
 8 3 -3 4.84366 3.09323 1
 8 3 -3 12.9104 2.9443 1
 -8 -3 3 6.30407 2.84481 16
 -8 -3 3 2.44459 2.77466 1
 -8 -3 3 2.87076 3.86535 21
 -8 -3 3 8.02923 3.93017 4
 7 3 -3 3.39045 2.55421 1
 7 3 -3 4.61035 1.31838 5
 7 3 -3 2.05472 2.28268 1
 -7 -3 3 0.63481 2.36054 1
 -7 -3 3 5.31212 2.60504 21
 -7 -3 3 7.79715 2.29021 20
 -7 -3 3 3.8232 2.85509 4
 6 3 -3 238.026 7.40897 24
 6 3 -3 259.112 8.55462 1
 6 3 -3 260.596 8.52952 1
 -6 -3 3 236.763 7.56505 20
 -6 -3 3 253.008 7.37549 14
 -6 -3 3 252.94 8.6337 4
 -6 -3 3 251.133 8.50174 1
 5 3 -3 13.0351 2.12068 1
 5 3 -3 17.6666 1.86933 24
 5 3 -3 14.1565 2.44993 1
 -5 -3 3 15.6756 1.69519 21
 -5 -3 3 18.2879 2.03841 14
 -5 -3 3 14.7653 1.7127 20
 -5 -3 3 14.3865 2.21705 1
 -5 -3 3 16.2732 1.95695 23
 4 3 -3 50.0197 3.19118 1
 4 3 -3 51.0385 2.38839 24
 4 3 -3 45.5262 3.16279 1
 -4 -3 3 51.283 2.28989 21
 -4 -3 3 46.3322 2.71638 23
 -4 -3 3 48.05 2.47298 20
 -4 -3 3 47.2883 2.10775 14
 -4 -3 3 48.6621 3.20654 8
 -4 -3 3 51.4663 3.2355 1
 3 3 -3 21.2192 2.12648 11
 3 3 -3 23.2452 2.27408 1
 3 3 -3 19.6106 1.55552 24
 -3 -3 3 21.8437 2.32416 8
 -3 -3 3 21.076 1.15144 14
 -3 -3 3 22.696 1.90164 23
 -3 -3 3 19.5617 1.33326 21
 -3 -3 3 20.4461 2.19152 1
 -3 -3 3 20.6974 1.56464 20
 -3 -3 3 21.7887 2.18746 13
 2 3 -3 57.3742 2.67301 11
 2 3 -3 57.1823 2.63493 1
 2 3 -3 60.0298 2.10097 24
 -2 -3 3 55.4094 2.96428 8
 -2 -3 3 60.894 1.8218 18
 -2 -3 3 57.1335 1.73138 21
 -2 -3 3 57.2245 2.6977 13
 -2 -3 3 57.7101 2.61589 1
 -2 -3 3 50.109 1.50098 14
 -2 -3 3 56.232 1.80407 2
 -2 -3 3 59.352 2.10339 20
 1 3 -3 46.0422 2.21471 1
 1 3 -3 46.2869 2.45076 3
 1 3 -3 49.6805 2.07618 19
 1 3 -3 52.2194 1.85871 24
 1 3 -3 47.1627 1.61951 21
 1 3 -3 48.9146 2.43866 13
 1 3 -3 45.6372 2.47774 11
 -1 -3 3 47.3705 1.64602 24
 -1 -3 3 46.7016 1.66467 18
 -1 -3 3 46.5221 2.29352 1
 -1 -3 3 50.4539 2.26932 23
 -1 -3 3 48.7087 2.1783 11
 -1 -3 3 43.6557 1.80338 20
 -1 -3 3 48.8371 1.59257 14
 -1 -3 3 49.8698 2.39967 13
 -1 -3 3 45.9039 1.87399 12
 0 3 -3 232.154 6.39612 13
 0 3 -3 237.671 6.34377 1
 0 3 -3 226.599 6.44228 7
 0 3 -3 247.517 6.30386 23
 0 3 -3 233.644 6.68161 3
 0 3 -3 241.984 6.37172 1
 0 3 -3 245.589 6.02571 24
 0 3 -3 248.281 6.17328 19
 0 -3 3 236.74 5.99263 24
 0 -3 3 237.758 6.70691 3
 0 -3 3 228.226 5.96495 6
 0 -3 3 226.904 6.11594 14
 0 -3 3 232.526 6.34379 1
 0 -3 3 247.318 6.06613 20
 0 -3 3 235.257 6.1574 19
 0 -3 3 235.451 6.35915 1
 0 -3 3 229.002 6.48744 13
 0 -3 3 239.762 6.09563 22
 0 -3 3 236.675 6.25207 23
 -1 3 -3 9.32499 1.21744 1
 -1 3 -3 10.5546 1.1158 24
 -1 3 -3 10.2723 1.48011 7
 -1 3 -3 9.26585 1.28112 1
 -1 3 -3 10.3102 1.33191 14
 -1 3 -3 14.2999 1.49083 23
 -1 3 -3 9.70625 1.45782 13
 1 -3 3 10.8645 0.75192 16
 1 -3 3 10.499 1.2933 1
 1 -3 3 10.8415 0.96198 24
 1 -3 3 12.9502 1.11227 22
 1 -3 3 11.3608 1.3179 14
 1 -3 3 11.7245 1.13894 20
 1 -3 3 10.0363 1.47763 13
 1 -3 3 10.5159 1.46027 7
 1 -3 3 11.6144 1.2752 19
 1 -3 3 10.8106 1.30125 1
 1 -3 3 10.1239 1.23637 23
 -2 3 -3 236.637 6.6922 10
 -2 3 -3 247.65 6.86869 1
 -2 3 -3 240.303 6.82455 14
 -2 3 -3 245.566 6.92183 1
 -2 3 -3 246.347 6.72802 23
 -2 3 -3 247.653 6.94769 13
 2 -3 3 256.431 6.25874 22
 2 -3 3 246.255 6.89599 1
 2 -3 3 245.208 6.89768 1
 2 -3 3 247.078 6.8321 23
 2 -3 3 228.209 6.89836 14
 -3 3 -3 223.469 6.65787 13
 -3 3 -3 232.072 6.56275 23
 -3 3 -3 220.35 6.62868 1
 -3 3 -3 222.411 6.63312 14
 -3 3 -3 231.398 6.77398 1
 3 -3 3 222.102 5.81803 22
 3 -3 3 216.616 6.68389 23
 3 -3 3 220.808 6.32915 10
 3 -3 3 217.345 6.58741 1
 3 -3 3 226.249 6.82207 14
 3 -3 3 222.956 6.78545 1
 -4 3 -3 579.066 13.9561 16
 -4 3 -3 601.215 15.6128 14
 -4 3 -3 617.773 15.453 23
 -4 3 -3 570.239 14.8452 5
 -4 3 -3 588.959 15.384 13
 -4 3 -3 599.17 15.6825 1
 -4 3 -3 598.973 15.6597 1
 4 -3 3 594.632 15.7048 1
 4 -3 3 569.111 15.5261 23
 4 -3 3 594.405 15.0959 10
 4 -3 3 584.276 15.5536 14
 4 -3 3 582.815 15.5927 1
 -5 3 -3 92.8451 2.78387 16
 -5 3 -3 98.0263 4.73926 1
 -5 3 -3 103.651 4.7763 1
 -5 3 -3 105.648 4.77729 14
 -5 3 -3 98.0078 4.42506 13
 -5 3 -3 90.5313 3.97023 23
 -5 3 -3 96.1983 3.74066 5
 5 -3 3 101.685 4.84038 1
 5 -3 3 96.1117 4.81716 23
 5 -3 3 101.437 4.72488 14
 5 -3 3 101.162 4.18646 10
 5 -3 3 101.284 4.74319 1
 -6 3 -3 9.12372 2.4594 1
 -6 3 -3 15.2347 2.5332 14
 -6 3 -3 10.862 2.57494 13
 -6 3 -3 15.8541 2.65265 1
 -6 3 -3 12.4339 1.28944 16
 6 -3 3 14.0945 2.82035 23
 6 -3 3 9.78086 2.52511 1
 6 -3 3 14.0705 2.37229 10
 6 -3 3 10.506 1.49107 8
 6 -3 3 13.4043 2.56052 1
 6 -3 3 11.3865 2.56764 14
 -7 3 -3 17.1147 1.66726 16
 -7 3 -3 17.5939 3.17131 14
 -7 3 -3 19.7077 3.07514 1
 -7 3 -3 10.7643 2.96555 13
 -7 3 -3 15.6188 2.51709 1
 7 -3 3 14.2625 3.32929 23
 7 -3 3 12.0339 2.97427 14
 7 -3 3 11.5244 2.34572 1
 7 -3 3 16.8241 2.84138 10
 7 -3 3 15.0916 3.03786 1
 -8 3 -3 -0.9257 2.62453 1
 -8 3 -3 1.72317 3.22386 14
 -8 3 -3 2.44808 1.80268 16
 -8 3 -3 2.69972 3.38701 13
 8 -3 3 4.53709 2.95153 1
 8 -3 3 3.7114 3.36557 23
 8 -3 3 -1.3536 2.65886 1
 8 -3 3 0.82007 3.53467 14
 8 -3 3 5.70478 3.38176 10
 9 2 -3 11.9516 3.74105 1
 8 2 -3 2.17189 2.79524 1
 8 2 -3 2.92058 2.77351 14
 8 2 -3 -1.0515 2.58237 1
 -8 -2 3 4.72253 2.99034 1
 -8 -2 3 4.48256 3.69062 4
 -8 -2 3 2.07957 2.70832 16
 7 2 -3 37.4679 4.06243 1
 7 2 -3 41.2017 3.95348 1
 7 2 -3 42.3074 3.70676 14
 -7 -2 3 30.7798 3.33559 16
 -7 -2 3 37.455 4.72024 4
 -7 -2 3 37.7325 3.27567 20
 -7 -2 3 37.1487 3.9265 1
 6 2 -3 38.5434 3.6308 1
 6 2 -3 43.9807 3.10387 14
 6 2 -3 44.0611 3.83041 1
 -6 -2 3 45.4283 4.17474 4
 -6 -2 3 41.9037 3.7359 1
 -6 -2 3 39.2978 2.93171 20
 -6 -2 3 37.7758 3.43902 23
 5 2 -3 63.9515 3.69771 1
 5 2 -3 55.8084 2.77967 14
 5 2 -3 61.1889 3.66648 1
 -5 -2 3 57.6439 3.15531 23
 -5 -2 3 56.7093 2.91463 20
 -5 -2 3 61.537 3.69603 1
 -5 -2 3 60.0662 3.97107 4
 4 2 -3 792.667 20.1431 1
 4 2 -3 772.335 19.22 14
 4 2 -3 777.49 20.1057 1
 -4 -2 3 808.406 20.1744 1
 -4 -2 3 796.491 20.3688 4
 -4 -2 3 798.906 19.5852 20
 -4 -2 3 814.879 20.0438 23
 3 2 -3 12.1214 1.60236 1
 3 2 -3 11.309 1.02673 14
 3 2 -3 14.2577 1.93929 1
 -3 -2 3 11.5754 1.60025 1
 -3 -2 3 12.1972 1.75289 8
 -3 -2 3 13.464 1.37546 20
 -3 -2 3 14.971 1.82229 23
 -3 -2 3 11.3115 1.46014 13
 2 2 -3 255.818 6.5296 24
 2 2 -3 248.074 7.07105 11
 2 2 -3 257.653 6.46792 9
 2 2 -3 248.382 6.87445 1
 -2 -2 3 273.415 6.59339 20
 -2 -2 3 251.644 6.5923 2
 -2 -2 3 264.435 6.46886 18
 -2 -2 3 270.639 6.88884 23
 -2 -2 3 257.091 6.17318 21
 -2 -2 3 259.386 7.27332 8
 -2 -2 3 255.673 6.85825 13
 -2 -2 3 250.335 6.90561 1
 1 2 -3 38.2455 1.9108 13
 1 2 -3 37.9732 1.78846 1
 1 2 -3 40.7489 1.8736 19
 1 2 -3 38.2912 1.40591 24
 1 2 -3 33.2527 2.21639 11
 1 2 -3 38.8791 1.38778 20
 1 2 -3 34.5115 1.64876 2
 1 2 -3 37.4834 1.10051 21
 -1 -2 3 37.3241 1.82463 12
 -1 -2 3 36.8298 2.05784 8
 -1 -2 3 40.3545 1.40464 20
 -1 -2 3 38.5523 1.53031 18
 -1 -2 3 36.524 1.90745 13
 -1 -2 3 36.6688 2.19763 11
 -1 -2 3 35.8743 1.64881 1
 -1 -2 3 42.2895 1.67799 17
 -1 -2 3 36.9868 1.32021 24
 -1 -2 3 37.2668 1.18226 14
 0 2 -3 479.299 11.5438 23
 0 2 -3 500.296 11.4094 20
 0 2 -3 464.996 11.8356 13
 0 2 -3 483.278 11.3789 24
 0 2 -3 458.936 11.5613 1
 0 2 -3 465.65 12.0282 3
 0 2 -3 459.042 11.5208 6
 0 2 -3 464.146 11.9947 7
 0 2 -3 467.492 11.5904 1
 0 2 -3 470.181 11.5877 14
 0 2 -3 496.216 11.7113 19
 0 -2 3 457.936 11.9447 11
 0 -2 3 467.893 11.6024 1
 0 -2 3 483.95 11.5753 18
 0 -2 3 481.402 11.3892 24
 0 -2 3 468.719 12.1009 3
 0 -2 3 473.236 11.5748 1
 0 -2 3 470.808 11.6058 14
 0 -2 3 470.782 11.802 4
 0 -2 3 465.824 11.8335 13
 0 -2 3 473.783 11.5658 22
 0 -2 3 467.899 11.5423 6
 0 -2 3 478.831 11.5387 23
 0 -2 3 478.294 11.6874 19
 0 -2 3 471.026 11.5903 17
 0 -2 3 509.679 11.4461 20
 0 -2 3 489.974 11.4858 16
 -1 2 -3 3.42447 1.04589 1
 -1 2 -3 4.55711 0.95471 23
 -1 2 -3 4.97135 0.51066 16
 -1 2 -3 4.51813 1.0574 13
 -1 2 -3 5.40146 1.04432 1
 -1 2 -3 5.22792 1.18244 14
 -1 2 -3 5.87745 1.21793 10
 1 -2 3 4.86551 1.36271 7
 1 -2 3 3.93416 1.0652 1
 1 -2 3 6.21863 0.76317 24
 1 -2 3 5.43198 0.54954 16
 1 -2 3 5.06451 0.82646 22
 1 -2 3 5.69511 1.01845 23
 1 -2 3 5.95322 0.76142 17
 1 -2 3 6.15636 1.11034 19
 1 -2 3 3.84753 0.74221 4
 1 -2 3 4.83738 1.0858 1
 1 -2 3 4.77239 1.19047 14
 -2 2 -3 5.2247 1.38734 13
 -2 2 -3 7.23152 1.28984 10
 -2 2 -3 7.58643 0.56063 16
 -2 2 -3 6.65147 1.23663 1
 -2 2 -3 6.15929 1.23322 1
 -2 2 -3 5.66009 1.12023 23
 -2 2 -3 7.29722 1.40039 14
 2 -2 3 8.12028 1.3314 23
 2 -2 3 7.08999 1.31027 10
 2 -2 3 7.47313 0.64308 17
 2 -2 3 7.39462 1.22333 14
 2 -2 3 6.04763 1.23863 1
 2 -2 3 6.9056 1.345 1
 2 -2 3 7.40511 0.88301 22
 -3 2 -3 1.51335 1.06028 5
 -3 2 -3 1.16556 1.08809 23
 -3 2 -3 -0.9481 1.44319 1
 -3 2 -3 -0.2103 1.08362 14
 -3 2 -3 -0.8955 1.40186 1
 3 -2 3 -0.6711 1.18018 10
 3 -2 3 0.04017 1.39824 14
 3 -2 3 -2.5584 1.40675 1
 3 -2 3 -0.7076 1.38357 23
 3 -2 3 0.71446 0.45478 17
 3 -2 3 0.36268 1.49098 1
 -4 2 -3 276.673 8.32972 1
 -4 2 -3 278.073 7.9776 23
 -4 2 -3 273.47 8.33017 1
 -4 2 -3 289.997 8.35633 14
 -4 2 -3 258.801 7.51683 5
 4 -2 3 277.085 8.30958 23
 4 -2 3 269.492 8.23866 14
 4 -2 3 270.032 8.2842 1
 4 -2 3 277.541 7.87985 10
 4 -2 3 282.387 8.42181 1
 -5 2 -3 30.9544 2.66408 14
 -5 2 -3 23.0044 2.33405 23
 -5 2 -3 30.0992 3.23791 1
 -5 2 -3 31.9384 3.26044 1
 5 -2 3 35.3334 3.32273 1
 5 -2 3 30.0595 2.74683 10
 5 -2 3 36.1517 3.41754 23
 5 -2 3 29.8396 3.26791 1
 5 -2 3 28.5243 3.17508 14
 -6 2 -3 57.672 4.31967 14
 -6 2 -3 44.866 3.39663 1
 -6 2 -3 53.7343 4.20046 1
 6 -2 3 44.2567 3.37252 1
 6 -2 3 59.2552 4.00664 14
 6 -2 3 59.7121 4.33746 1
 6 -2 3 54.4615 3.86701 10
 6 -2 3 55.2144 4.42498 23
 -7 2 -3 3.46029 2.33602 1
 -7 2 -3 4.82501 1.69997 16
 -7 2 -3 3.52705 2.74326 14
 7 -2 3 1.25286 2.82228 23
 7 -2 3 7.9207 2.73586 1
 7 -2 3 2.6027 2.44284 1
 7 -2 3 6.33713 2.68201 14
 7 -2 3 7.47749 2.7764 10
 -8 2 -3 -2.6825 2.50816 1
 -8 2 -3 3.28587 3.43843 14
 -8 2 -3 1.5182 2.02224 16
 8 -2 3 9.4465 2.98947 1
 8 -2 3 -2.8492 3.27643 10
 8 -2 3 -2.1961 3.39163 14
 8 -2 3 2.53193 3.34892 23
 9 1 -3 6.59168 3.59478 1
 9 1 -3 -2.0804 3.26954 1
 9 1 -3 2.35559 3.7887 14
 -9 -1 3 -0.8986 2.87796 16
 -9 -1 3 5.00158 3.70096 1
 -9 -1 3 -0.4286 4.42644 4
 8 1 -3 8.74987 2.93575 14
 8 1 -3 11.0638 3.04958 1
 8 1 -3 10.798 2.81652 1
 -8 -1 3 4.02803 3.36752 4
 -8 -1 3 5.79536 2.96364 1
 -8 -1 3 5.64055 2.53211 16
 7 1 -3 8.80456 2.29332 14
 7 1 -3 13.1743 2.75892 1
 7 1 -3 7.6686 2.76317 23
 7 1 -3 12.5859 2.65818 1
 -7 -1 3 10.3835 2.29914 16
 -7 -1 3 12.0546 2.80931 1
 -7 -1 3 11.1626 2.80556 4
 6 1 -3 68.2551 4.25965 1
 6 1 -3 60.0868 4.1152 23
 6 1 -3 61.3676 4.00387 1
 6 1 -3 51.6541 3.26517 14
 -6 -1 3 51.8868 3.16773 20
 -6 -1 3 56.8413 4.33625 4
 -6 -1 3 66.1017 3.75311 23
 -6 -1 3 56.2117 3.92649 1
 -6 -1 3 52.2589 3.17749 16
 5 1 -3 192.787 6.56248 23
 5 1 -3 207.398 6.77323 1
 5 1 -3 199.244 6.56449 8
 5 1 -3 200.846 5.87166 14
 5 1 -3 210.565 6.70473 1
 -5 -1 3 207.082 6.77814 4
 -5 -1 3 203.323 6.67288 1
 -5 -1 3 186.756 4.98 15
 -5 -1 3 197.566 5.95512 20
 -5 -1 3 184.23 4.95162 9
 -5 -1 3 199.669 6.35851 23
 -5 -1 3 198.778 5.98223 16
 4 1 -3 873.602 21.2717 1
 4 1 -3 837.992 21.1522 8
 4 1 -3 819.885 20.4083 14
 4 1 -3 869.666 21.215 1
 -4 -1 3 859.153 21.0659 23
 -4 -1 3 859.409 21.3591 4
 -4 -1 3 803.626 20.0251 9
 -4 -1 3 833.055 20.6174 20
 -4 -1 3 814.686 20.0536 15
 -4 -1 3 852.517 21.1883 1
 3 1 -3 48.4908 2.73894 8
 3 1 -3 47.8207 2.57394 1
 3 1 -3 49.6024 1.88559 14
 3 1 -3 50.424 2.55859 23
 3 1 -3 54.152 2.64128 1
 -3 -1 3 56.2323 2.42431 23
 -3 -1 3 52.6336 2.88557 4
 -3 -1 3 50.2881 1.77191 9
 -3 -1 3 52.5236 2.0871 20
 -3 -1 3 53.5945 2.08894 17
 -3 -1 3 51.9806 2.62222 1
 -3 -1 3 50.0104 2.25688 13
 2 1 -3 177.805 5.54938 8
 2 1 -3 190.282 5.19518 1
 2 1 -3 185.049 5.17069 1
 2 1 -3 181.129 4.59579 14
 2 1 -3 184.844 4.8877 9
 2 1 -3 185.749 4.91873 15
 -2 -1 3 192.844 4.85424 20
 -2 -1 3 188.442 5.08428 23
 -2 -1 3 184.386 5.58652 8
 -2 -1 3 185.678 4.58768 21
 -2 -1 3 185.139 5.03675 17
 -2 -1 3 180.746 5.108 2
 -2 -1 3 190.685 5.19855 1
 -2 -1 3 190.976 5.08351 16
 -2 -1 3 188.92 4.87571 18
 -2 -1 3 184.336 5.60667 4
 -2 -1 3 183.74 4.93953 13
 1 1 -3 316.661 8.18333 2
 1 1 -3 313.302 8.46807 4
 1 1 -3 320.682 8.21248 12
 1 1 -3 333.457 7.81239 14
 1 1 -3 325.905 7.76867 24
 1 1 -3 319.544 7.90849 1
 1 1 -3 302.203 8.40249 11
 1 1 -3 328.124 8.23043 19
 1 1 -3 336.01 7.77715 20
 1 1 -3 321.055 7.71717 21
 1 1 -3 310.543 8.48795 8
 1 1 -3 308.638 8.02938 13
 -1 -1 3 343.458 8.16382 17
 -1 -1 3 313.941 8.05732 13
 -1 -1 3 335.164 8.03084 18
 -1 -1 3 322.482 8.18484 2
 -1 -1 3 330.77 7.99284 22
 -1 -1 3 329.748 7.77814 20
 -1 -1 3 319.682 8.24884 12
 -1 -1 3 331.955 8.26688 19
 -1 -1 3 333.672 8.07083 16
 -1 -1 3 324.633 8.5013 4
 -1 -1 3 326.634 7.91803 1
 -1 -1 3 313.397 8.26121 6
 -1 -1 3 318.726 8.52373 8
 0 1 -3 1054.24 24.0696 19
 0 1 -3 1076.78 23.8661 16
 0 1 -3 1013.35 23.9754 14
 0 1 -3 992.805 24.2978 7
 0 1 -3 987.617 24.1801 8
 0 1 -3 986.511 23.7661 23
 0 1 -3 988.579 24.3491 3
 0 1 -3 975.23 24.2019 10
 0 1 -3 977.35 23.9681 6
 0 1 -3 952.962 23.9092 1
 0 1 -3 980.271 24.044 1
 0 1 -3 1006.96 24.1058 4
 0 1 -3 1021.77 24.1103 13
 0 1 -3 1009.59 23.8959 22
 0 1 -3 984.93 24.1808 11
 0 -1 3 1024.3 23.9027 22
 0 -1 3 1001.01 24.2956 7
 0 -1 3 1020.23 24.1261 4
 0 -1 3 1012.5 23.7126 23
 0 -1 3 972.159 24.1775 8
 0 -1 3 962.95 23.7906 1
 0 -1 3 1041.66 23.6421 24
 0 -1 3 1020.62 23.9953 14
 0 -1 3 989.812 24.3439 3
 0 -1 3 969.76 24.127 1
 0 -1 3 1031.17 23.9493 17
 0 -1 3 1022.49 24.07 19
 0 -1 3 1051.59 23.6612 20
 0 -1 3 1020.22 23.9591 18
 0 -1 3 1046.5 23.8644 16
 0 -1 3 972.68 24.1746 11
 -1 1 -3 163.129 4.83692 5
 -1 1 -3 169.486 4.86713 14
 -1 1 -3 175.539 4.54243 23
 -1 1 -3 168.695 4.41651 4
 -1 1 -3 162.088 4.8911 10
 -1 1 -3 166.193 4.21669 16
 -1 1 -3 170.943 4.61685 1
 -1 1 -3 167.545 4.57287 1
 1 -1 3 165.966 4.5105 23
 1 -1 3 163.966 4.89845 10
 1 -1 3 172.108 4.6579 19
 1 -1 3 171.79 4.65529 1
 1 -1 3 164.252 4.85428 14
 1 -1 3 166.605 4.59675 1
 1 -1 3 166.458 5.04475 7
 1 -1 3 162.91 4.31525 20
 1 -1 3 173.961 4.37454 17
 1 -1 3 171.09 4.25254 16
 1 -1 3 164.55 4.54263 8
 1 -1 3 170.738 4.46023 22
 -2 1 -3 0.54287 1.14138 1
 -2 1 -3 0.84688 1.12037 1
 -2 1 -3 0.58882 1.02501 5
 -2 1 -3 -0.2214 0.89367 23
 -2 1 -3 0.17698 1.27324 14
 -2 1 -3 -0.3465 0.55112 16
 2 -1 3 -0.7907 1.23105 14
 2 -1 3 0.0232 1.14354 1
 2 -1 3 -0.381 0.71127 22
 2 -1 3 -0.024 1.13904 1
 2 -1 3 0.56265 0.57515 17
 2 -1 3 1.45787 1.21347 10
 2 -1 3 0.42079 0.52481 8
 2 -1 3 -0.51 0.99005 23
 -3 1 -3 12.3681 1.43231 5
 -3 1 -3 12.8764 1.64888 23
 -3 1 -3 12.2207 1.75581 1
 -3 1 -3 13.1261 1.82901 1
 -3 1 -3 14.7764 1.64882 14
 3 -1 3 12.9779 1.81345 14
 3 -1 3 13.1456 1.6728 10
 3 -1 3 11.5663 1.71983 23
 3 -1 3 14.6597 1.04825 17
 3 -1 3 11.9181 1.7918 1
 3 -1 3 12.2066 1.84021 1
 -4 1 -3 17.0269 1.76563 23
 -4 1 -3 20.0665 2.15758 14
 -4 1 -3 19.2852 2.21232 1
 -4 1 -3 15.9742 2.27823 1
 4 -1 3 25.4693 2.45151 10
 4 -1 3 18.5508 2.17584 14
 4 -1 3 14.4667 2.25277 23
 4 -1 3 21.7069 2.72093 1
 4 -1 3 20.727 1.26391 17
 4 -1 3 18.5051 2.33904 1
 -5 1 -3 -0.7965 1.85488 1
 -5 1 -3 -1.7434 1.75127 14
 5 -1 3 -0.0189 0.85396 17
 5 -1 3 -1.8462 1.99638 23
 5 -1 3 1.1884 1.94709 1
 5 -1 3 0.26821 1.84639 1
 5 -1 3 0.72696 1.84451 14
 -6 1 -3 29.1939 2.31309 4
 -6 1 -3 30.6365 3.57279 1
 -6 1 -3 35.2034 3.77889 14
 6 -1 3 28.4869 1.69099 17
 6 -1 3 35.0876 3.49132 10
 6 -1 3 28.9608 3.78871 14
 6 -1 3 24.5861 3.32434 23
 6 -1 3 35.8867 3.68029 1
 6 -1 3 30.1952 3.48229 1
 -7 1 -3 0.24799 1.47917 4
 -7 1 -3 6.26098 2.40442 1
 -7 1 -3 4.43127 2.70346 14
 7 -1 3 4.90188 2.70096 14
 7 -1 3 3.03189 2.67653 10
 7 -1 3 -0.5685 2.24496 1
 7 -1 3 2.70371 2.31407 23
 7 -1 3 5.79129 2.46463 1
 -8 1 -3 -0.9091 3.52792 14
 -8 1 -3 3.13283 2.33328 16
 -8 1 -3 3.40523 2.66773 1
 8 -1 3 8.71989 3.91505 10
 8 -1 3 5.16581 3.41658 23
 8 -1 3 11.489 3.16395 1
 8 -1 3 6.02366 3.4962 14
 9 0 -3 12.5574 3.79517 1
 9 0 -3 4.2137 3.3559 1
 9 0 -3 10.3543 3.99754 14
 -9 0 3 4.52699 3.54614 1
 -9 0 3 3.92921 2.87631 16
 8 0 -3 10.1378 3.14643 1
 8 0 -3 1.92346 2.94699 23
 8 0 -3 3.30399 2.91929 14
 8 0 -3 6.44854 2.68364 1
 -8 0 3 4.39805 2.62523 16
 -8 0 3 0.21792 2.73795 1
 -8 0 3 0.16933 2.96211 4
 7 0 -3 17.6935 3.12938 23
 7 0 -3 26.8584 3.79971 8
 7 0 -3 25.4572 3.11 1
 7 0 -3 27.0195 3.53847 1
 7 0 -3 21.5492 2.66272 14
 -7 0 3 22.993 3.24499 4
 -7 0 3 25.5645 2.87265 16
 -7 0 3 22.1899 1.92856 15
 -7 0 3 21.1286 1.74669 9
 -7 0 3 22.2625 3.10146 1
 6 0 -3 100.159 4.89728 1
 6 0 -3 99.106 4.76147 8
 6 0 -3 94.429 4.84586 23
 6 0 -3 102.118 4.90887 1
 6 0 -3 97.8452 4.21002 14
 -6 0 3 93.6074 4.61807 4
 -6 0 3 94.6591 4.45286 23
 -6 0 3 89.1408 3.86794 16
 -6 0 3 97.552 4.84027 1
 5 0 -3 7.97566 1.45337 14
 5 0 -3 10.609 1.99497 1
 5 0 -3 10.691 2.17171 23
 5 0 -3 7.71462 1.9817 8
 5 0 -3 14.8364 2.10548 1
 -5 0 3 9.93632 1.56059 16
 -5 0 3 10.9101 1.71723 23
 -5 0 3 12.6103 2.11617 1
 -5 0 3 10.0849 2.02019 4
 4 0 -3 5.88051 1.56851 1
 4 0 -3 2.72207 1.14583 14
 4 0 -3 7.74708 1.6425 1
 4 0 -3 1.11385 1.53165 8
 4 0 -3 4.89526 0.4992 5
 -4 0 3 5.66429 1.34331 23
 -4 0 3 4.32936 1.57475 1
 -4 0 3 6.89226 1.14644 17
 -4 0 3 5.31556 1.1886 16
 -4 0 3 6.23815 1.2761 20
 -4 0 3 2.17794 1.63723 4
 3 0 -3 1.87059 1.07459 23
 3 0 -3 0.25025 0.79788 14
 3 0 -3 1.16521 1.14097 1
 3 0 -3 1.55485 1.17865 1
 3 0 -3 0.71183 1.35701 8
 -3 0 3 0.1032 0.87908 20
 -3 0 3 0.53618 1.36558 4
 -3 0 3 1.43181 1.21281 1
 -3 0 3 3.05801 0.93344 16
 -3 0 3 0.64005 1.15647 1
 -3 0 3 0.51618 0.85654 15
 -3 0 3 0.78876 0.84959 9
 -3 0 3 0.75747 1.00075 23
 -3 0 3 0.88801 0.81449 17
 2 0 -3 186.38 5.03922 1
 2 0 -3 178.345 4.96336 1
 2 0 -3 176.522 5.46084 4
 2 0 -3 185.598 4.96894 23
 2 0 -3 175.46 5.45965 8
 2 0 -3 180.4 4.83065 5
 -2 0 3 179.9 4.99769 1
 -2 0 3 179.632 5.02395 15
 -2 0 3 192.051 4.95392 18
 -2 0 3 180.836 5.35368 4
 -2 0 3 181.097 4.58588 13
 -2 0 3 177.511 4.98178 1
 -2 0 3 192.231 4.75915 22
 -2 0 3 180.838 4.98685 9
 -2 0 3 184.293 5.32726 6
 -2 0 3 183.034 4.70153 20
 -2 0 3 183.302 4.89813 23
[truncated: 1,420,049 more chars]
